# Supplementary material
Source: PubMed Central journal article supplement (PMC8384659)
Supplement: NIHMS1686423-supplement-14.pdf [file NIHMS1686423-supplement-14.pdf]

**Table S3: The panel of mAbs and fluorescent-tagged dyes used for the detection of immune cell populations**

| Antigen            | Clone     | Fluorophore | Catalog  | Company   |
|--------------------|-----------|-------------|----------|-----------|
| CD3                | UCHT1     | PerCP-Cy5.5 | 560835   | BD        |
| CD4                | L120      | BUV805      | 748596   | BD        |
| CD8                | SK1       | BV650       | 565289   | BD        |
| CD45RA             | 5H9       | BUV395      | 740315   | BD        |
| CD45RO             | UCHL1     | BV711       | 563722   | BD        |
| CD56               | B159      | AF700       | 557919   | BD        |
| TCR $\gamma\delta$ | B1        | PE-CF594    | 562511   | BD        |
| V $\delta$ 1       | TS8.2     | FITC        | ab171097 | abcam     |
| V $\delta$ 2       | B6        | BUV563      | 748582   | BD        |
| IFN- $\gamma$      | B27       | BV605       | 562974   | BD        |
| TNF                | Mab11     | APC-Cy7     | 502944   | Biolegend |
| IL-13              | JES10-5A2 | BV421       | 563580   | BD        |
| IL-4               | MP4-25D2  | BV786       | 564113   | BD        |
| IL-17              | N49-643   | BV510       | 563295   | BD        |
| IL-22              | 2G12A41   | PE-Cy7      | 366708   | Biolegend |
| TGF- $\beta$       | TW4-9E7   | PE          | 562339   | BD        |
| IL-10              | JES3-19F1 | APC         | 554707   | BD        |
| Live/ Dead         | -         | Zombie- UV  | 423107   | Biolegend |



Table S4: Full list of DEGs (adjusted P&lt;0.05) in lesional (n=13) vs. non-lesional PN (n=13)

| GeneID          | GeneName   | logFC (PN_Lesional / PN_Nonlesional) | padj   |
|-----------------|------------|--------------------------------------|--------|
| ENSG00000175899 | A2M        | -1.271769795                         | 3E-09  |
| ENSG00000166535 | A2ML1      | 2.549997048                          | 9E-21  |
| ENSG00000128274 | A4GALT     | -1.780791346                         | 3E-15  |
| ENSG00000197953 | AADA2L2    | 2.292296206                          | 2E-11  |
| ENSG00000188984 | AADA2L3    | -2.005649192                         | 0.039  |
| ENSG00000087884 | AAMDC      | -1.213233074                         | 6E-29  |
| ENSG00000205002 | AARD       | -1.839783303                         | 3E-08  |
| ENSG00000183044 | ABAT       | -1.304338357                         | 9E-06  |
| ENSG00000154263 | ABCA10     | -1.597229866                         | 3E-09  |
| ENSG00000144452 | ABCA12     | 2.291110785                          | 7E-26  |
| ENSG00000107331 | ABCA2      | -1.469736861                         | 5E-07  |
| ENSG00000167972 | ABCA3      | -1.81483011                          | 1E-11  |
| ENSG00000154262 | ABCA6      | -1.985860705                         | 3E-12  |
| ENSG00000141338 | ABCA8      | -2.716644796                         | 7E-15  |
| ENSG00000154258 | ABCA9      | -2.798650824                         | 2E-14  |
| ENSG00000073734 | ABCB11     | -1.718382192                         | 0.0083 |
| ENSG00000004846 | ABCB5      | -2.416408116                         | 0.0007 |
| ENSG00000091262 | ABCC6      | -3.763752744                         | 3E-15  |
| ENSG00000069431 | ABCC9      | -1.60213135                          | 4E-07  |
| ENSG00000173208 | ABCD2      | -3.754531039                         | 8E-16  |
| ENSG00000160179 | ABCG1      | 1.03088825                           | 0.0002 |
| ENSG00000172350 | ABCG4      | 5.465386999                          | 8E-28  |
| ENSG00000143994 | ABHD1      | -2.373464686                         | 0.0007 |
| ENSG00000136379 | ABHD17C    | 1.093538288                          | 2E-10  |
| ENSG00000154175 | ABI3BP     | -2.200513132                         | 2E-08  |
| ENSG00000173210 | ABLIM3     | -1.666870688                         | 3E-09  |
| ENSG00000175164 | ABO        | -1.434951459                         | 3E-08  |
| ENSG00000258881 | AC007040.2 | -3.236258926                         | 0.0004 |
| ENSG00000277196 | AC007325.2 | -1.501126307                         | 2E-05  |
| ENSG00000277639 | AC007906.2 | -1.92375876                          | 5E-10  |
| ENSG00000268744 | AC008758.4 | -2.023640543                         | 0.0097 |
| ENSG00000260300 | AC009119.2 | -1.757494308                         | 0.0214 |
| ENSG00000260729 | AC009690.1 | -2.606395699                         | 0.0015 |
| ENSG00000258311 | AC009779.3 | -1.461848476                         | 0.0493 |
| ENSG00000269741 | AC011473.4 | 5.290475884                          | 8E-13  |
| ENSG00000267385 | AC011498.4 | -1.898006109                         | 0.006  |
| ENSG00000258461 | AC012651.1 | -1.192939551                         | 0.0056 |
| ENSG00000279765 | AC013394.1 | -1.166810937                         | 0.0034 |
| ENSG00000262304 | AC027796.3 | -1.403758263                         | 0.0474 |
| ENSG00000241962 | AC079447.1 | -1.554973524                         | 0.0295 |
| ENSG00000267127 | AC090360.1 | -2.946632316                         | 3E-06  |
| ENSG00000272305 | AC096887.1 | -1.372523487                         | 0.0335 |
| ENSG00000260007 | AC107871.1 | -1.075204022                         | 0.0337 |
| ENSG00000273238 | AC116565.1 | -1.038871705                         | 0.0161 |
| ENSG00000271254 | AC240274.1 | -1.155089406                         | 0.0003 |
| ENSG00000076555 | ACACB      | -2.941483755                         | 4E-22  |
| ENSG00000115361 | ACADL      | -2.430000922                         | 8E-11  |

|                 |          |              |        |
|-----------------|----------|--------------|--------|
| ENSG00000122971 | ACADS    | -1.017344348 | 3E-11  |
| ENSG00000196177 | ACADSB   | -1.240293644 | 1E-13  |
| ENSG00000181513 | ACBD4    | -1.19075189  | 4E-12  |
| ENSG00000110455 | ACCS     | -1.035785085 | 2E-05  |
| ENSG00000159640 | ACE      | -1.372130226 | 0.0002 |
| ENSG00000167769 | ACER1    | 2.522035157  | 1E-10  |
| ENSG00000087085 | ACHE     | -1.991494699 | 0.0008 |
| ENSG00000213088 | ACKR1    | -1.67586396  | 9E-10  |
| ENSG00000144476 | ACKR3    | -1.138039335 | 3E-06  |
| ENSG00000122729 | ACO1     | -1.534490463 | 1E-09  |
| ENSG00000184227 | ACOT1    | -1.564879729 | 8E-06  |
| ENSG00000119673 | ACOT2    | -1.451869914 | 2E-07  |
| ENSG00000097021 | ACOT7    | 1.437497028  | 2E-06  |
| ENSG00000168306 | ACOX2    | -1.831080366 | 8E-08  |
| ENSG00000087008 | ACOX3    | 1.107205836  | 1E-08  |
| ENSG00000102575 | ACP5     | 1.227111702  | 5E-07  |
| ENSG00000183760 | ACP7     | 3.27714314   | 6E-22  |
| ENSG00000014257 | ACPP     | 2.106117464  | 3E-13  |
| ENSG00000100312 | ACR      | -1.720102449 | 0.0076 |
| ENSG00000111644 | ACRBP    | -1.573180043 | 0.0081 |
| ENSG00000134940 | ACRV1    | 3.667153921  | 1E-06  |
| ENSG00000130377 | ACSBG2   | -2.494012541 | 0.0381 |
| ENSG00000167107 | ACSF2    | -1.075579606 | 2E-06  |
| ENSG00000197142 | ACSL5    | -1.028450408 | 0.0002 |
| ENSG00000166743 | ACSM1    | -1.680821775 | 4E-06  |
| ENSG00000066813 | ACSM2B   | -3.175483649 | 0.0061 |
| ENSG00000005187 | ACSM3    | -1.141545825 | 0.0229 |
| ENSG00000183549 | ACSM5    | -3.471268172 | 4E-15  |
| ENSG00000111058 | ACSS3    | -2.964670321 | 8E-22  |
| ENSG00000107796 | ACTA2    | -2.11878485  | 2E-19  |
| ENSG00000163017 | ACTG2    | -1.907179027 | 2E-07  |
| ENSG00000182584 | ACTL10   | 1.076086304  | 0.0046 |
| ENSG00000115091 | ACTR3    | 1.237645049  | 1E-07  |
| ENSG00000133627 | ACTR3B   | -1.001303614 | 3E-08  |
| ENSG00000106526 | ACTR3C   | 1.17598181   | 3E-05  |
| ENSG00000184378 | ACTRT3   | 1.56523767   | 0.0001 |
| ENSG00000123612 | ACVR1C   | -2.435958626 | 1E-08  |
| ENSG00000114739 | ACVR2B   | -1.067536244 | 2E-05  |
| ENSG00000139567 | ACVRL1   | -1.290767404 | 7E-07  |
| ENSG00000132744 | ACY3     | 3.244488829  | 0.0104 |
| ENSG00000093072 | ADA2     | -1.337075291 | 4E-06  |
| ENSG00000008277 | ADAM22   | -2.671783727 | 2E-11  |
| ENSG00000114948 | ADAM23   | 3.35138705   | 2E-19  |
| ENSG00000042980 | ADAM28   | -1.066856565 | 0.0094 |
| ENSG00000149451 | ADAM33   | -1.648356098 | 1E-07  |
| ENSG00000142303 | ADAMTS10 | -1.476255474 | 2E-07  |
| ENSG00000138316 | ADAMTS14 | 1.210510713  | 0.0033 |
| ENSG00000145536 | ADAMTS16 | -3.033560617 | 0.0001 |

|                 |           |              |        |
|-----------------|-----------|--------------|--------|
| ENSG00000140873 | ADAMTS18  | -1.699781252 | 0.0037 |
| ENSG00000145808 | ADAMTS19  | -2.009521887 | 0.038  |
| ENSG00000154736 | ADAMTS5   | -2.083149416 | 1E-09  |
| ENSG00000178031 | ADAMTSL1  | -1.370958693 | 2E-05  |
| ENSG00000156218 | ADAMTSL3  | -2.254833942 | 4E-14  |
| ENSG00000184060 | ADAP2     | 2.513229448  | 2E-29  |
| ENSG00000185736 | ADARB2    | -2.608463089 | 7E-07  |
| ENSG00000078295 | ADCY2     | -1.61061667  | 2E-06  |
| ENSG00000129467 | ADCY4     | -1.001799092 | 3E-05  |
| ENSG00000173175 | ADCY5     | -3.020227677 | 9E-28  |
| ENSG00000174233 | ADCY6     | -1.529482997 | 8E-12  |
| ENSG00000121281 | ADCY7     | 1.024120795  | 4E-08  |
| ENSG00000155897 | ADCY8     | -3.955621857 | 8E-10  |
| ENSG00000078549 | ADCYAP1R1 | -1.380410066 | 0.0042 |
| ENSG00000075340 | ADD2      | -1.570730645 | 0.0002 |
| ENSG00000148700 | ADD3      | -1.486574624 | 2E-11  |
| ENSG00000020181 | ADGRA2    | -1.624607122 | 5E-06  |
| ENSG00000111452 | ADGRD1    | -3.328755019 | 9E-13  |
| ENSG00000123146 | ADGRE5    | -1.044149209 | 0.0003 |
| ENSG00000153292 | ADGRF1    | 3.213204049  | 6E-07  |
| ENSG00000164393 | ADGRF2    | 1.164649911  | 0.0016 |
| ENSG00000153294 | ADGRF4    | 1.818879352  | 7E-10  |
| ENSG00000173698 | ADGRG2    | -2.459939674 | 1E-06  |
| ENSG00000164199 | ADGRV1    | -1.597037597 | 7E-08  |
| ENSG00000187758 | ADH1A     | -3.358025568 | 0.002  |
| ENSG00000196616 | ADH1B     | -4.94279557  | 5E-15  |
| ENSG00000248144 | ADH1C     | -4.444824103 | 3E-09  |
| ENSG00000196344 | ADH7      | 2.935383328  | 6E-09  |
| ENSG00000147576 | ADHFE1    | -1.281203148 | 1E-07  |
| ENSG00000181092 | ADIPOQ    | -4.793226796 | 2E-11  |
| ENSG00000148671 | ADIRF     | -1.648646776 | 3E-09  |
| ENSG00000128165 | ADM2      | 2.49342584   | 2E-13  |
| ENSG00000163485 | ADORA1    | -3.077077502 | 2E-18  |
| ENSG00000120907 | ADRA1A    | -2.854859523 | 1E-07  |
| ENSG00000170214 | ADRA1B    | -2.623041459 | 3E-06  |
| ENSG00000150594 | ADRA2A    | -2.41857952  | 9E-20  |
| ENSG00000274286 | ADRA2B    | -1.630367082 | 0.0143 |
| ENSG00000184160 | ADRA2C    | -1.256242955 | 9E-05  |
| ENSG00000043591 | ADRB1     | -2.628854659 | 2E-14  |
| ENSG00000106624 | AEBP1     | -1.038696335 | 0.0003 |
| ENSG00000181026 | AEN       | 1.349100288  | 4E-09  |
| ENSG00000196526 | AFAP1     | -1.1235926   | 5E-11  |
| ENSG00000169129 | AFAP1L2   | 1.229373743  | 1E-14  |
| ENSG00000155966 | AFF2      | -1.9499438   | 7E-09  |
| ENSG00000144218 | AFF3      | -2.227499668 | 3E-11  |
| ENSG00000187546 | AGMO      | -1.661899422 | 0.0036 |
| ENSG00000155189 | AGPAT5    | 1.222263411  | 1E-11  |
| ENSG00000135744 | AGT       | -3.014008072 | 1E-07  |

|                 |            |              |        |
|-----------------|------------|--------------|--------|
| ENSG00000144891 | AGTR1      | -3.809990402 | 6E-17  |
| ENSG00000172482 | AGXT       | -2.490248386 | 0.0442 |
| ENSG00000111732 | AICDA      | -2.906441772 | 0.0017 |
| ENSG00000042286 | AIFM2      | -2.289661377 | 5E-16  |
| ENSG00000183773 | AIFM3      | -2.277744033 | 0.0013 |
| ENSG00000163568 | AIM2       | 2.273691806  | 3E-07  |
| ENSG00000196581 | AJAP1      | 2.137791421  | 1E-08  |
| ENSG00000131016 | AKAP12     | -2.341722368 | 2E-20  |
| ENSG00000151320 | AKAP6      | -1.23526186  | 4E-07  |
| ENSG00000198074 | AKR1B10    | 5.561614033  | 4E-57  |
| ENSG00000227471 | AKR1B15    | 4.656076738  | 4E-24  |
| ENSG00000196139 | AKR1C3     | -1.572337179 | 5E-07  |
| ENSG00000117020 | AKT3       | -1.434188011 | 2E-07  |
| ENSG00000282988 | AL031777.3 | 1.652877817  | 0.0099 |
| ENSG00000273259 | AL049839.2 | -2.948980548 | 0.035  |
| ENSG00000274322 | AL136531.2 | 1.711134416  | 0.0379 |
| ENSG00000285130 | AL358113.1 | 1.202171677  | 0.0114 |
| ENSG00000236782 | AL391650.1 | 2.163771198  | 0.0472 |
| ENSG00000256029 | AL590560.1 | -1.346542196 | 0.0069 |
| ENSG00000273748 | AL592183.1 | -1.095276204 | 0.0004 |
| ENSG00000259916 | AL845331.2 | -6.244341532 | 6E-11  |
| ENSG00000158578 | ALAS2      | -2.654881497 | 0.0075 |
| ENSG00000170017 | ALCAM      | -1.500962118 | 1E-11  |
| ENSG00000165092 | ALDH1A1    | -1.475022778 | 4E-12  |
| ENSG00000128918 | ALDH1A2    | -2.025107666 | 3E-18  |
| ENSG00000137124 | ALDH1B1    | -1.629425038 | 6E-10  |
| ENSG00000144908 | ALDH1L1    | -3.576097836 | 9E-17  |
| ENSG00000108602 | ALDH3A1    | 1.46280496   | 7E-08  |
| ENSG00000132746 | ALDH3B2    | 1.575850236  | 3E-09  |
| ENSG00000159423 | ALDH4A1    | 1.255671215  | 1E-11  |
| ENSG00000119711 | ALDH6A1    | -1.425770045 | 1E-08  |
| ENSG00000118514 | ALDH8A1    | -1.335009073 | 0.0083 |
| ENSG00000171094 | ALK        | -2.865350602 | 0.001  |
| ENSG00000189292 | ALKAL2     | -3.056263555 | 1E-09  |
| ENSG00000151360 | ALLC       | -3.060402336 | 0.0272 |
| ENSG00000108839 | ALOX12     | 2.429659292  | 2E-10  |
| ENSG00000179477 | ALOX12B    | 3.147776339  | 8E-19  |
| ENSG00000179148 | ALOXE3     | 2.428757464  | 5E-10  |
| ENSG00000052850 | ALX4       | -2.2500514   | 6E-07  |
| ENSG00000183684 | ALYREF     | 1.154837439  | 3E-07  |
| ENSG00000123505 | AMD1       | 1.164353834  | 5E-11  |
| ENSG00000139344 | AMDHD1     | 1.061188242  | 0.0016 |
| ENSG00000181754 | AMIGO1     | -1.441467778 | 1E-22  |
| ENSG00000101935 | AMMECR1    | 2.151901192  | 6E-31  |
| ENSG00000126016 | AMOT       | -2.597401637 | 2E-18  |
| ENSG00000114019 | AMOTL2     | -1.23401603  | 9E-10  |
| ENSG00000133805 | AMPD3      | 1.18577386   | 5E-07  |
| ENSG00000078053 | AMPH       | -1.034694676 | 0.005  |

|                 |            |              |        |
|-----------------|------------|--------------|--------|
| ENSG00000240038 | AMY2B      | -2.061806266 | 7E-09  |
| ENSG00000214274 | ANG        | -1.145976248 | 1E-07  |
| ENSG00000154188 | ANGPT1     | -2.232067012 | 2E-13  |
| ENSG00000101280 | ANGPT4     | -3.586648664 | 3E-08  |
| ENSG00000116194 | ANGPTL1    | -3.417995034 | 2E-08  |
| ENSG00000136859 | ANGPTL2    | -1.240203934 | 4E-08  |
| ENSG00000187151 | ANGPTL5    | -5.49919603  | 6E-10  |
| ENSG00000171819 | ANGPTL7    | -2.492397541 | 0.0027 |
| ENSG00000130173 | ANGPTL8    | -4.05353374  | 6E-12  |
| ENSG00000145362 | ANK2       | -2.308108561 | 3E-13  |
| ENSG00000166839 | ANKDD1A    | -1.653441374 | 1E-06  |
| ENSG00000180071 | ANKRD18A   | -3.197322329 | 5E-13  |
| ENSG00000260691 | ANKRD20A1  | -3.609599877 | 0.0011 |
| ENSG00000172014 | ANKRD20A4  | -2.245441225 | 0.0009 |
| ENSG00000152766 | ANKRD22    | 1.485061788  | 2E-07  |
| ENSG00000163126 | ANKRD23    | -1.02411248  | 0.0201 |
| ENSG00000089847 | ANKRD24    | -1.873814926 | 4E-06  |
| ENSG00000148513 | ANKRD30A   | -4.079361518 | 4E-05  |
| ENSG00000145700 | ANKRD31    | 4.188300651  | 6E-18  |
| ENSG00000164236 | ANKRD33B   | -1.504806641 | 4E-05  |
| ENSG00000135976 | ANKRD36    | -1.524253899 | 9E-05  |
| ENSG00000196912 | ANKRD36B   | -1.456971939 | 5E-05  |
| ENSG00000174501 | ANKRD36C   | -1.922753174 | 3E-07  |
| ENSG00000144031 | ANKRD53    | -1.807346399 | 8E-05  |
| ENSG00000135299 | ANKRD6     | -1.153582439 | 6E-06  |
| ENSG00000185046 | ANKS1B     | -1.518984751 | 5E-05  |
| ENSG00000011426 | ANLN       | 1.476200596  | 1E-05  |
| ENSG00000047617 | ANO2       | -1.459721459 | 9E-05  |
| ENSG00000134343 | ANO3       | -3.207430082 | 3E-14  |
| ENSG00000171714 | ANO5       | -2.897626628 | 1E-12  |
| ENSG00000146205 | ANO7       | -1.201007487 | 0.0082 |
| ENSG00000163297 | ANTXR2     | -1.319973222 | 3E-06  |
| ENSG00000197043 | ANXA6      | -1.911585225 | 5E-20  |
| ENSG00000265190 | ANXA8      | 1.306767207  | 2E-06  |
| ENSG00000143412 | ANXA9      | 3.497368816  | 1E-09  |
| ENSG00000002726 | AOC1       | -2.088209319 | 3E-16  |
| ENSG00000131471 | AOC3       | -3.177863376 | 7E-28  |
| ENSG00000138356 | AOX1       | -2.657768233 | 2E-14  |
| ENSG00000254469 | AP002495.2 | -1.390552823 | 0.0001 |
| ENSG00000106367 | AP1S1      | 1.287922002  | 3E-11  |
| ENSG00000152056 | AP1S3      | 1.3613726    | 2E-07  |
| ENSG00000042753 | AP2S1      | 1.299392287  | 4E-08  |
| ENSG00000107282 | APBA1      | -2.003120921 | 1E-10  |
| ENSG00000166313 | APBB1      | -1.284258815 | 4E-10  |
| ENSG00000077420 | APBB1IP    | -2.161844373 | 9E-17  |
| ENSG00000128383 | APOBEC3A   | 5.391413433  | 2E-08  |
| ENSG00000179750 | APOBEC3B   | 2.067452962  | 6E-05  |
| ENSG00000130208 | APOC1      | -1.860559036 | 4E-05  |

|                 |          |              |        |
|-----------------|----------|--------------|--------|
| ENSG00000189058 | APOD     | -3.696587147 | 7E-44  |
| ENSG00000130203 | APOE     | -1.769905698 | 3E-11  |
| ENSG00000128284 | APOL3    | -1.106359551 | 3E-06  |
| ENSG00000198931 | APRT     | 1.036465301  | 1E-06  |
| ENSG00000240583 | AQP1     | -1.351366273 | 2E-06  |
| ENSG00000165272 | AQP3     | 2.331903068  | 1E-17  |
| ENSG00000086159 | AQP6     | -2.054432552 | 0.0213 |
| ENSG00000165269 | AQP7     | -4.231562777 | 4E-14  |
| ENSG00000169083 | AR       | -2.254199092 | 1E-08  |
| ENSG00000198576 | ARC      | 1.868394943  | 0.0002 |
| ENSG00000109321 | AREG     | 1.788432017  | 2E-07  |
| ENSG00000165527 | ARF6     | 1.034767331  | 4E-12  |
| ENSG00000112379 | ARFGEF3  | -2.429197369 | 4E-20  |
| ENSG00000118520 | ARG1     | 4.119174989  | 5E-25  |
| ENSG00000081181 | ARG2     | 1.698523067  | 6E-05  |
| ENSG00000137727 | ARHGAP20 | -3.044449221 | 7E-30  |
| ENSG00000006740 | ARHGAP44 | -1.737878402 | 6E-10  |
| ENSG00000047648 | ARHGAP6  | -2.037694365 | 2E-11  |
| ENSG00000242173 | ARHGDIG  | -2.897062419 | 0.0035 |
| ENSG00000104728 | ARHGEF10 | -1.385081166 | 0.0001 |
| ENSG00000198844 | ARHGEF15 | -1.025422574 | 4E-05  |
| ENSG00000110237 | ARHGEF17 | -1.077611323 | 1E-07  |
| ENSG00000116584 | ARHGEF2  | -1.026785131 | 5E-09  |
| ENSG00000240771 | ARHGEF25 | -1.535526895 | 1E-13  |
| ENSG00000114790 | ARHGEF26 | -1.206870739 | 0.0001 |
| ENSG00000236699 | ARHGEF38 | -2.938177182 | 7E-09  |
| ENSG00000136002 | ARHGEF4  | 1.029246016  | 5E-12  |
| ENSG00000165801 | ARHGEF40 | -1.891415749 | 3E-12  |
| ENSG00000129675 | ARHGEF6  | -2.179990964 | 4E-17  |
| ENSG00000032219 | ARID4A   | -1.110136656 | 0.0009 |
| ENSG00000179674 | ARL14    | 3.501320484  | 3E-08  |
| ENSG00000228696 | ARL17B   | -1.643171977 | 2E-05  |
| ENSG00000175906 | ARL4D    | 1.618878822  | 3E-10  |
| ENSG00000162980 | ARL5A    | 1.01567871   | 9E-05  |
| ENSG00000165997 | ARL5B    | 1.361793447  | 3E-06  |
| ENSG00000144746 | ARL6IP5  | -1.059674812 | 9E-08  |
| ENSG00000134108 | ARL8B    | 1.023427244  | 3E-06  |
| ENSG00000157343 | ARMC12   | -1.578904615 | 0.0113 |
| ENSG00000184867 | ARMCX2   | -1.468934581 | 7E-07  |
| ENSG00000102401 | ARMCX3   | -1.422291514 | 7E-10  |
| ENSG00000198520 | ARMH1    | -1.440303448 | 0.0002 |
| ENSG00000139971 | ARMH4    | -1.110311172 | 4E-07  |
| ENSG00000029153 | ARNTL2   | 2.860872266  | 9E-36  |
| ENSG00000241685 | ARPC1A   | 1.103672382  | 2E-07  |
| ENSG00000163466 | ARPC2    | 1.131115139  | 9E-13  |
| ENSG00000136950 | ARPC5L   | 1.431662544  | 9E-11  |
| ENSG00000062096 | ARSF     | 2.099574576  | 2E-05  |
| ENSG00000183876 | ARSI     | 1.627572276  | 0.0003 |



|                 |              |              |        |
|-----------------|--------------|--------------|--------|
| ENSG00000156219 | ART3         | -1.180619669 | 0.0094 |
| ENSG00000111339 | ART4         | -1.477338581 | 0.0122 |
| ENSG00000167311 | ART5         | -1.442004039 | 0.0238 |
| ENSG00000117407 | ARTN         | 1.673770129  | 0.0123 |
| ENSG00000099889 | ARVCF        | -1.078066614 | 0.0005 |
| ENSG00000165192 | ASB11        | -3.030805536 | 7E-06  |
| ENSG00000005981 | ASB4         | -1.635170489 | 0.0489 |
| ENSG00000102048 | ASB9         | -1.169769851 | 0.0008 |
| ENSG00000105011 | ASF1B        | 1.563199809  | 9E-06  |
| ENSG00000213199 | ASIC3        | -1.720848832 | 0.0001 |
| ENSG00000101440 | ASIP         | -4.173564993 | 2E-11  |
| ENSG00000196433 | ASMT         | -2.717442679 | 4E-05  |
| ENSG00000108381 | ASPA         | -2.140226917 | 2E-13  |
| ENSG00000166183 | ASPG         | 1.714631313  | 4E-05  |
| ENSG00000198363 | ASPH         | -1.405156179 | 2E-07  |
| ENSG00000244617 | ASPRV1       | 4.481767175  | 1E-15  |
| ENSG00000162174 | ASRGL1       | -1.77030259  | 8E-13  |
| ENSG00000152092 | ASTN1        | -2.452290848 | 0.0054 |
| ENSG00000148219 | ASTN2        | -1.56333002  | 6E-08  |
| ENSG00000141431 | ASXL3        | -2.563367717 | 6E-11  |
| ENSG00000197785 | ATAD3A       | 1.030150571  | 3E-05  |
| ENSG00000162772 | ATF3         | -1.301508798 | 1E-05  |
| ENSG00000168874 | ATOH8        | -3.159987618 | 2E-15  |
| ENSG00000177556 | ATOX1        | 1.041968077  | 7E-07  |
| ENSG00000206190 | ATP10A       | -1.457696126 | 3E-07  |
| ENSG00000118322 | ATP10B       | 1.775915054  | 6E-08  |
| ENSG00000145246 | ATP10D       | 1.344000939  | 4E-19  |
| ENSG00000058063 | ATP11B       | 1.372797265  | 4E-08  |
| ENSG00000075673 | ATP12A       | 3.691582772  | 3E-12  |
| ENSG00000187527 | ATP13A5      | -2.832447542 | 1E-16  |
| ENSG00000018625 | ATP1A2       | -3.881041515 | 2E-34  |
| ENSG00000143153 | ATP1B1       | -2.023000457 | 2E-23  |
| ENSG00000129244 | ATP1B2       | -1.888084285 | 2E-07  |
| ENSG00000074370 | ATP2A3       | -2.960571083 | 1E-22  |
| ENSG00000157087 | ATP2B2       | -3.123812413 | 3E-12  |
| ENSG00000248919 | ATP5MF-PTCD1 | -1.29431624  | 0.0315 |
| ENSG00000205464 | ATP6AP1L     | -1.245078696 | 0.0001 |
| ENSG00000105929 | ATP6V0A4     | -2.911947345 | 9E-32  |
| ENSG00000147614 | ATP6V0D2     | -1.691028245 | 0.0036 |
| ENSG00000171130 | ATP6V0E2     | -1.924479694 | 3E-22  |
| ENSG00000116039 | ATP6V1B1     | -3.291520935 | 9E-10  |
| ENSG00000147416 | ATP6V1B2     | 1.095680634  | 1E-06  |
| ENSG00000213760 | ATP6V1G2     | -1.355278282 | 0.0337 |
| ENSG00000124406 | ATP8A1       | -1.444880757 | 3E-08  |
| ENSG00000130270 | ATP8B3       | 1.509364815  | 0.0016 |
| ENSG00000104043 | ATP8B4       | -1.58770863  | 1E-07  |
| ENSG00000127423 | AUNIP        | 2.40045851   | 1E-08  |
| ENSG00000087586 | AURKA        | 1.618176684  | 4E-09  |

|                 |          |              |        |
|-----------------|----------|--------------|--------|
| ENSG00000178999 | AURKB    | 1.152523305  | 0.0011 |
| ENSG00000169857 | AVEN     | 1.256264013  | 5E-11  |
| ENSG00000126895 | AVPR2    | -1.34713224  | 0.0007 |
| ENSG00000167601 | AXL      | -1.608429934 | 2E-13  |
| ENSG00000183778 | B3GALT5  | -3.099045648 | 5E-17  |
| ENSG00000179913 | B3GNT3   | 1.542387322  | 9E-05  |
| ENSG00000176383 | B3GNT4   | 1.484759687  | 5E-06  |
| ENSG00000176597 | B3GNT5   | 1.919276278  | 2E-12  |
| ENSG00000177191 | B3GNT8   | 1.339798488  | 3E-06  |
| ENSG00000139044 | B4GALNT3 | 1.003588884  | 2E-06  |
| ENSG00000112182 | BACH2    | -1.22877266  | 4E-06  |
| ENSG00000112208 | BAG2     | -1.093294241 | 0.0006 |
| ENSG00000128298 | BAIAP2L2 | 1.676789505  | 2E-05  |
| ENSG00000007516 | BAIAP3   | -1.374996064 | 2E-06  |
| ENSG00000030110 | BAK1     | 1.484101257  | 8E-09  |
| ENSG00000095739 | BAMBI    | -1.091005443 | 2E-05  |
| ENSG00000153064 | BANK1    | -1.730780991 | 4E-12  |
| ENSG00000132692 | BCAN     | -1.065114716 | 0.0017 |
| ENSG00000137936 | BCAR3    | -1.78628121  | 4E-10  |
| ENSG00000064787 | BCAS1    | -2.727867694 | 4E-18  |
| ENSG00000124243 | BCAS4    | -1.258421854 | 5E-08  |
| ENSG00000103507 | BCKDK    | 1.224423363  | 3E-07  |
| ENSG00000171791 | BCL2     | -2.275720613 | 6E-25  |
| ENSG00000140379 | BCL2A1   | 1.270628848  | 0.0455 |
| ENSG00000137875 | BCL2L10  | 1.955032202  | 5E-11  |
| ENSG00000100739 | BDKRB1   | 1.423407102  | 0.0031 |
| ENSG00000168398 | BDKRB2   | 1.445608224  | 1E-15  |
| ENSG00000176697 | BDNF     | 1.689571595  | 7E-06  |
| ENSG00000162373 | BEND5    | -1.577811187 | 2E-07  |
| ENSG00000151917 | BEND6    | 1.141832345  | 0.0003 |
| ENSG00000165626 | BEND7    | -2.119152861 | 3E-12  |
| ENSG00000167995 | BEST1    | -1.122167441 | 0.0002 |
| ENSG00000039987 | BEST2    | -2.140206386 | 0.0365 |
| ENSG00000133169 | BEX1     | -2.342344762 | 0.0023 |
| ENSG00000102409 | BEX4     | -1.168952787 | 3E-14  |
| ENSG00000184515 | BEX5     | -2.211977192 | 7E-13  |
| ENSG00000125864 | BFSP1    | 1.704285641  | 2E-10  |
| ENSG00000180535 | BHLHA15  | -3.887836208 | 4E-06  |
| ENSG00000180828 | BHLHE22  | -1.002300811 | 0.0417 |
| ENSG00000123095 | BHLHE41  | -2.264590519 | 1E-25  |
| ENSG00000132840 | BHMT2    | -3.06329066  | 2E-22  |
| ENSG00000122870 | BICC1    | -1.379533792 | 1E-05  |
| ENSG00000185963 | BICD2    | 1.419963016  | 2E-17  |
| ENSG00000089685 | BIRC5    | 2.252385016  | 2E-13  |
| ENSG00000197299 | BLM      | 1.022475453  | 0.0008 |
| ENSG00000108578 | BLMH     | 2.136611824  | 1E-18  |
| ENSG00000095585 | BLNK     | 1.33701795   | 7E-11  |
| ENSG00000196072 | BLOC1S2  | 1.343373857  | 1E-08  |

|                 |           |              |        |
|-----------------|-----------|--------------|--------|
| ENSG00000138756 | BMP2K     | 1.613104717  | 5E-15  |
| ENSG00000152785 | BMP3      | -2.830342613 | 0.002  |
| ENSG00000112175 | BMP5      | -3.67341354  | 8E-10  |
| ENSG00000153162 | BMP6      | -1.723164855 | 4E-08  |
| ENSG00000101144 | BMP7      | 1.087215581  | 0.0007 |
| ENSG00000164619 | BMPER     | -1.493972681 | 0.001  |
| ENSG00000138696 | BMPR1B    | 1.690946821  | 5E-08  |
| ENSG00000102010 | BMX       | -1.841240243 | 1E-04  |
| ENSG00000169594 | BNC1      | 2.254651601  | 6E-12  |
| ENSG00000173068 | BNC2      | -1.292477242 | 8E-06  |
| ENSG00000176171 | BNIP3     | 1.319243169  | 4E-05  |
| ENSG00000144857 | BOC       | -1.500281386 | 1E-06  |
| ENSG00000169627 | BOLA2B    | 1.892999455  | 0.0269 |
| ENSG00000261236 | BOP1      | 1.133320445  | 2E-06  |
| ENSG00000136122 | BORA      | 1.023665003  | 1E-07  |
| ENSG00000184459 | BPIFC     | 2.622634778  | 1E-10  |
| ENSG00000078725 | BRINP1    | 2.301085765  | 0.001  |
| ENSG00000136492 | BRIP1     | 1.013807054  | 0.0003 |
| ENSG00000160469 | BRSK1     | -1.41434785  | 0.005  |
| ENSG00000162399 | BSND      | 2.118756645  | 0.0415 |
| ENSG00000119411 | BSPRY     | 1.511660696  | 7E-07  |
| ENSG00000109743 | BST1      | -1.374903547 | 5E-09  |
| ENSG00000189195 | BTBD8     | -1.450917922 | 0.0008 |
| ENSG00000174808 | BTC       | -2.563331297 | 4E-12  |
| ENSG00000154640 | BTG3      | 1.20626964   | 4E-11  |
| ENSG00000165810 | BTNL9     | -2.776216196 | 1E-14  |
| ENSG00000169679 | BUB1      | 1.970381311  | 1E-08  |
| ENSG00000156970 | BUB1B     | 1.047841156  | 0.001  |
| ENSG00000112276 | BVES      | -1.208262064 | 6E-05  |
| ENSG00000112578 | BYSL      | 1.101919152  | 8E-06  |
| ENSG00000082153 | BZW1      | 1.152458976  | 4E-05  |
| ENSG00000222047 | C10orf55  | 1.690836255  | 1E-14  |
| ENSG00000179133 | C10orf67  | -1.5893688   | 0.0209 |
| ENSG00000154493 | C10orf90  | -1.886072967 | 5E-06  |
| ENSG00000120055 | C10orf95  | 1.133471068  | 0.0036 |
| ENSG00000188373 | C10orf99  | 7.238835105  | 1E-23  |
| ENSG00000185742 | C11orf87  | 3.964151556  | 2E-12  |
| ENSG00000187479 | C11orf96  | -1.463177325 | 1E-09  |
| ENSG00000133641 | C12orf29  | 1.533407835  | 5E-12  |
| ENSG00000185306 | C12orf56  | 3.673465377  | 8E-31  |
| ENSG00000283199 | C13orf46  | -2.76597729  | 6E-05  |
| ENSG00000227051 | C14orf132 | -1.024060615 | 0.0016 |
| ENSG00000184601 | C14orf180 | -4.847668567 | 4E-10  |
| ENSG00000179008 | C14orf39  | -3.18992175  | 0.0271 |
| ENSG00000166920 | C15orf48  | 2.902540684  | 5E-05  |
| ENSG00000175779 | C15orf53  | 1.567263524  | 0.0011 |
| ENSG00000205363 | C15orf59  | -1.155036882 | 0.0003 |
| ENSG00000188277 | C15orf62  | 1.054495324  | 0.0038 |

|                 |            |              |        |
|-----------------|------------|--------------|--------|
| ENSG00000166780 | C16orf45   | -1.553434979 | 2E-09  |
| ENSG00000154102 | C16orf74   | 1.821060411  | 1E-06  |
| ENSG00000159761 | C16orf86   | -1.277869225 | 0.0001 |
| ENSG00000153446 | C16orf89   | -1.75442327  | 0.023  |
| ENSG00000267221 | C17orf113  | -1.863771064 | 2E-06  |
| ENSG00000187624 | C17orf97   | -1.087286175 | 0.0002 |
| ENSG00000177025 | C19orf18   | -1.658707434 | 8E-05  |
| ENSG00000183397 | C19orf71   | -2.040746743 | 4E-05  |
| ENSG00000223658 | C1GALT1C1L | -1.454576671 | 0.0043 |
| ENSG00000180999 | C1orf105   | -2.062400676 | 0.0316 |
| ENSG00000162817 | C1orf115   | -2.796158939 | 6E-35  |
| ENSG00000143110 | C1orf162   | -1.017280947 | 0.0025 |
| ENSG00000215910 | C1orf167   | 1.316707961  | 0.0064 |
| ENSG00000239887 | C1orf226   | -1.024208571 | 2E-05  |
| ENSG00000203724 | C1orf53    | 1.288282441  | 0.0177 |
| ENSG00000198854 | C1orf68    | 1.815914936  | 8E-05  |
| ENSG00000162757 | C1orf74    | 1.173812611  | 0.001  |
| ENSG00000173372 | C1QA       | -1.799781889 | 4E-08  |
| ENSG00000173369 | C1QB       | -1.553952809 | 2E-05  |
| ENSG00000159189 | C1QC       | -1.482843383 | 1E-07  |
| ENSG00000173918 | C1QTNF1    | -1.111654552 | 5E-07  |
| ENSG00000082196 | C1QTNF3    | -1.178755733 | 0.0131 |
| ENSG00000172247 | C1QTNF4    | -1.484409939 | 0.0316 |
| ENSG00000163145 | C1QTNF7    | -3.788326965 | 2E-26  |
| ENSG00000240654 | C1QTNF9    | -3.113029632 | 0.0005 |
| ENSG00000205863 | C1QTNF9B   | -2.956559149 | 1E-05  |
| ENSG00000182326 | C1S        | -1.168383807 | 2E-05  |
| ENSG00000166278 | C2         | -1.206645423 | 0.0043 |
| ENSG00000196476 | C20orf96   | -1.347532296 | 1E-08  |
| ENSG00000154642 | C21orf91   | 1.30832057   | 5E-14  |
| ENSG00000198535 | C2CD4A     | 3.219286617  | 8E-05  |
| ENSG00000155754 | C2CD6      | -1.654903799 | 0.0125 |
| ENSG00000119147 | C2orf40    | -2.503264332 | 7E-17  |
| ENSG00000172478 | C2orf54    | 1.236651488  | 1E-06  |
| ENSG00000187944 | C2orf66    | 2.035674847  | 0.0061 |
| ENSG00000179270 | C2orf71    | -1.864898878 | 0.0381 |
| ENSG00000204128 | C2orf72    | -3.321047301 | 1E-34  |
| ENSG00000187699 | C2orf88    | -2.469812267 | 8E-29  |
| ENSG00000228486 | C2orf92    | -1.221057291 | 0.0001 |
| ENSG00000125730 | C3         | -3.532057267 | 5E-12  |
| ENSG00000171860 | C3AR1      | -1.308695104 | 0.0002 |
| ENSG00000088543 | C3orf18    | -1.415182659 | 1E-13  |
| ENSG00000174928 | C3orf33    | -1.603079141 | 0.0149 |
| ENSG00000163689 | C3orf67    | 1.357639741  | 8E-05  |
| ENSG00000187068 | C3orf70    | -1.545555089 | 4E-11  |
| ENSG00000123843 | C4BPB      | -2.262754732 | 0.004  |
| ENSG00000154274 | C4orf19    | -2.478311539 | 3E-20  |
| ENSG00000039537 | C6         | -3.687842603 | 4E-12  |

|                 |          |              |        |
|-----------------|----------|--------------|--------|
| ENSG00000203872 | C6orf163 | -1.130952982 | 1E-04  |
| ENSG00000181577 | C6orf223 | 2.511159939  | 0.0021 |
| ENSG00000112936 | C7       | -3.239432254 | 2E-17  |
| ENSG00000164746 | C7orf57  | 4.455989981  | 5E-09  |
| ENSG00000171060 | C8orf74  | 2.184231013  | 0.0496 |
| ENSG00000188959 | C9orf152 | -3.270660293 | 5E-12  |
| ENSG00000164972 | C9orf24  | -1.939812821 | 0.0027 |
| ENSG00000165181 | C9orf84  | 2.042496927  | 5E-05  |
| ENSG00000104267 | CA2      | 2.642972454  | 4E-15  |
| ENSG00000164879 | CA3      | -1.586289005 | 0.0001 |
| ENSG00000167434 | CA4      | -2.540452974 | 2E-07  |
| ENSG00000131686 | CA6      | -2.318364913 | 3E-14  |
| ENSG00000178538 | CA8      | -1.604063079 | 0.0009 |
| ENSG00000102547 | CAB39L   | -1.17803789  | 3E-10  |
| ENSG00000183346 | CABCOC01 | -1.693178425 | 0.0016 |
| ENSG00000157782 | CABP1    | -1.372308779 | 0.0058 |
| ENSG00000151067 | CACNA1C  | -1.113686054 | 0.0081 |
| ENSG00000157388 | CACNA1D  | -1.354367173 | 0.0006 |
| ENSG00000102001 | CACNA1F  | -1.594962837 | 0.0034 |
| ENSG00000196557 | CACNA1H  | -4.125440999 | 2E-24  |
| ENSG00000153956 | CACNA2D1 | -1.753206194 | 1E-11  |
| ENSG00000007402 | CACNA2D2 | -2.496862212 | 9E-12  |
| ENSG00000151062 | CACNA2D4 | -1.154696226 | 1E-05  |
| ENSG00000067191 | CACNB1   | -1.2853457   | 0.0002 |
| ENSG00000165995 | CACNB2   | -2.053780656 | 3E-06  |
| ENSG00000142408 | CACNG8   | -1.38829399  | 0.0001 |
| ENSG00000175161 | CADM2    | -2.36794473  | 9E-08  |
| ENSG00000162706 | CADM3    | -2.521065687 | 9E-20  |
| ENSG00000163618 | CADPS    | -1.510223326 | 4E-05  |
| ENSG00000081803 | CADPS2   | -1.479782807 | 1E-13  |
| ENSG00000172137 | CALB2    | -1.695246951 | 0.0078 |
| ENSG00000122786 | CALD1    | -1.033989611 | 2E-05  |
| ENSG00000138172 | CALHM2   | -1.266448549 | 3E-08  |
| ENSG00000178033 | CALHM5   | -1.274502163 | 2E-06  |
| ENSG00000178363 | CALML3   | 3.562808716  | 8E-24  |
| ENSG00000178372 | CALML5   | 3.307033505  | 4E-20  |
| ENSG00000169885 | CALML6   | -1.18081474  | 0.0033 |
| ENSG00000134072 | CAMK1    | -1.781491379 | 8E-27  |
| ENSG00000058404 | CAMK2B   | -2.647808642 | 3E-09  |
| ENSG00000162545 | CAMK2N1  | -1.456716173 | 7E-08  |
| ENSG00000163888 | CAMK2N2  | 2.85054276   | 0.0002 |
| ENSG00000144712 | CAND2    | -1.811334906 | 1E-07  |
| ENSG00000112186 | CAP2     | -1.021884212 | 0.0058 |
| ENSG00000042493 | CAPG     | 1.253028825  | 9E-09  |
| ENSG00000137225 | CAPN11   | -1.377172629 | 5E-06  |
| ENSG00000149260 | CAPN5    | -1.266232251 | 7E-06  |
| ENSG00000077274 | CAPN6    | -1.818188959 | 8E-05  |
| ENSG00000135773 | CAPN9    | -2.757727248 | 0.0002 |

|                 |          |              |        |
|-----------------|----------|--------------|--------|
| ENSG00000105519 | CAPS     | -1.001426202 | 0.0028 |
| ENSG00000180881 | CAPS2    | -1.197378226 | 7E-05  |
| ENSG00000116489 | CAPZA1   | 1.189498626  | 6E-09  |
| ENSG00000177938 | CAPZA3   | -2.660203847 | 0.0184 |
| ENSG00000141527 | CARD14   | 1.234349467  | 6E-06  |
| ENSG00000255501 | CARD18   | 1.65333108   | 8E-05  |
| ENSG00000153048 | CARHSP1  | 1.260731999  | 2E-05  |
| ENSG00000186648 | CARMIL3  | 1.138231252  | 0.0002 |
| ENSG00000118307 | CASC1    | -2.256032517 | 1E-07  |
| ENSG00000204403 | CASP12   | -1.285418262 | 0.0035 |
| ENSG00000105141 | CASP14   | 3.712785103  | 5E-10  |
| ENSG00000118729 | CASQ2    | -2.48840658  | 1E-12  |
| ENSG00000239282 | CASTOR1  | 2.163344131  | 0.0036 |
| ENSG00000099338 | CATSPERG | -1.598892532 | 4E-08  |
| ENSG00000168497 | CAVIN2   | -2.512642019 | 2E-19  |
| ENSG00000099625 | CBARP    | 1.623868554  | 1E-05  |
| ENSG00000142273 | CBLC     | 1.499618688  | 2E-07  |
| ENSG00000102924 | CBLN1    | -2.383390667 | 2E-07  |
| ENSG00000159228 | CBR1     | 1.179959316  | 2E-09  |
| ENSG00000159231 | CBR3     | 1.036353536  | 4E-05  |
| ENSG00000173894 | CBX2     | 1.93406032   | 1E-08  |
| ENSG00000183741 | CBX6     | -1.255736045 | 3E-06  |
| ENSG00000100307 | CBX7     | -1.776975225 | 6E-13  |
| ENSG00000183287 | CCBE1    | -2.322352168 | 2E-10  |
| ENSG00000168491 | CCDC110  | -2.475800339 | 7E-07  |
| ENSG00000105479 | CCDC114  | -1.503273043 | 0.0452 |
| ENSG00000147144 | CCDC120  | 1.544268678  | 2E-07  |
| ENSG00000007080 | CCDC124  | 1.039334153  | 5E-06  |
| ENSG00000180347 | CCDC129  | -3.832946152 | 1E-17  |
| ENSG00000128596 | CCDC136  | -1.5112803   | 5E-07  |
| ENSG00000170160 | CCDC144A | -1.923662459 | 0.0013 |
| ENSG00000135205 | CCDC146  | -1.690596057 | 3E-05  |
| ENSG00000153237 | CCDC148  | -1.362606172 | 0.0135 |
| ENSG00000181982 | CCDC149  | -1.166548997 | 1E-07  |
| ENSG00000163749 | CCDC158  | -1.82997533  | 0.0353 |
| ENSG00000203952 | CCDC160  | -3.25756983  | 6E-08  |
| ENSG00000198937 | CCDC167  | 1.099344754  | 6E-07  |
| ENSG00000120262 | CCDC170  | -1.847305866 | 5E-09  |
| ENSG00000154479 | CCDC173  | -1.343304647 | 0.0007 |
| ENSG00000166960 | CCDC178  | -2.429571268 | 2E-06  |
| ENSG00000197816 | CCDC180  | -2.310764336 | 0.0006 |
| ENSG00000213213 | CCDC183  | -1.435913575 | 0.0048 |
| ENSG00000163617 | CCDC191  | -1.233718945 | 0.0005 |
| ENSG00000230561 | CCDC192  | -2.110310327 | 1E-05  |
| ENSG00000159214 | CCDC24   | -1.157897536 | 0.001  |
| ENSG00000186409 | CCDC30   | -1.217393155 | 0.0004 |
| ENSG00000173421 | CCDC36   | -1.678604666 | 0.0009 |
| ENSG00000173093 | CCDC63   | 4.197198751  | 7E-10  |

|                 |         |              |        |
|-----------------|---------|--------------|--------|
| ENSG00000139537 | CCDC65  | -1.781766459 | 0.005  |
| ENSG00000198624 | CCDC69  | -1.49023852  | 3E-13  |
| ENSG00000216937 | CCDC7   | -1.283563398 | 0.0009 |
| ENSG00000186714 | CCDC73  | 1.491166765  | 0.0212 |
| ENSG00000163040 | CCDC74A | -1.055377658 | 2E-05  |
| ENSG00000091986 | CCDC80  | -1.885254203 | 0.001  |
| ENSG00000055813 | CCDC85A | -3.243229156 | 3E-09  |
| ENSG00000205476 | CCDC85C | 1.28039029   | 5E-07  |
| ENSG00000187094 | CCK     | 2.512496758  | 0.0465 |
| ENSG00000181374 | CCL13   | -1.764390207 | 0.0005 |
| ENSG00000276409 | CCL14   | -2.095117628 | 1E-05  |
| ENSG00000275152 | CCL16   | -1.85244666  | 0.0172 |
| ENSG00000137077 | CCL21   | 1.280768347  | 0.0027 |
| ENSG00000274736 | CCL23   | -1.773615521 | 0.0467 |
| ENSG00000106178 | CCL24   | 1.956966153  | 0.02   |
| ENSG00000151882 | CCL28   | -1.521394171 | 3E-18  |
| ENSG00000276085 | CCL3L1  | 3.42968928   | 0.0021 |
| ENSG00000275302 | CCL4    | 1.801610758  | 0.0229 |
| ENSG00000108688 | CCL7    | 3.198985805  | 2E-05  |
| ENSG00000133101 | CCNA1   | 3.254577274  | 0.0009 |
| ENSG00000145386 | CCNA2   | 1.547452691  | 4E-08  |
| ENSG00000134057 | CCNB1   | 2.098665231  | 4E-10  |
| ENSG00000157456 | CCNB2   | 1.8961208    | 6E-09  |
| ENSG00000147082 | CCNB3   | -1.022032263 | 0.0226 |
| ENSG00000110092 | CCND1   | -1.020466911 | 3E-06  |
| ENSG00000105173 | CCNE1   | 1.808996797  | 4E-16  |
| ENSG00000175305 | CCNE2   | 1.559678895  | 1E-10  |
| ENSG00000184305 | CCSER1  | -2.055236655 | 2E-09  |
| ENSG00000163468 | CCT3    | 1.229112119  | 5E-10  |
| ENSG00000150753 | CCT5    | 1.153306769  | 1E-06  |
| ENSG00000170458 | CD14    | -1.148287758 | 2E-09  |
| ENSG00000177575 | CD163   | -1.595585345 | 1E-06  |
| ENSG00000174950 | CD164L2 | 1.227418296  | 5E-08  |
| ENSG00000204936 | CD177   | 2.507094547  | 0.0013 |
| ENSG00000134061 | CD180   | -1.889034451 | 4E-07  |
| ENSG00000158473 | CD1D    | -1.121962774 | 0.0076 |
| ENSG00000091972 | CD200   | -1.124566538 | 0.0002 |
| ENSG00000090659 | CD209   | -2.003019008 | 2E-05  |
| ENSG00000272398 | CD24    | 1.690456458  | 4E-06  |
| ENSG00000122223 | CD244   | 1.805497708  | 0.015  |
| ENSG00000174807 | CD248   | -2.032157581 | 1E-14  |
| ENSG00000178562 | CD28    | -1.308340975 | 0.0041 |
| ENSG00000167850 | CD300C  | -1.227135497 | 0.0285 |
| ENSG00000178789 | CD300LB | -1.961206188 | 0.0002 |
| ENSG00000161649 | CD300LG | -2.980408612 | 8E-20  |
| ENSG00000241399 | CD302   | -1.791936792 | 3E-12  |
| ENSG00000105383 | CD33    | -1.088710147 | 0.013  |
| ENSG00000174059 | CD34    | -1.91237365  | 9E-13  |



|                 |        |              |        |
|-----------------|--------|--------------|--------|
| ENSG00000110848 | CD69   | 1.344038714  | 0.0313 |
| ENSG00000125726 | CD70   | -2.361387272 | 0.0002 |
| ENSG00000137101 | CD72   | -1.748741005 | 7E-06  |
| ENSG00000066294 | CD84   | -1.431864143 | 4E-06  |
| ENSG00000172116 | CD8B   | -1.811201211 | 0.0267 |
| ENSG00000102181 | CD99L2 | -1.511496817 | 3E-16  |
| ENSG00000158825 | CDA    | 2.676529874  | 2E-10  |
| ENSG00000117399 | CDC20  | 2.159658231  | 9E-08  |
| ENSG00000164045 | CDC25A | 1.506305979  | 1E-08  |
| ENSG00000101224 | CDC25B | 1.587878299  | 6E-13  |
| ENSG00000158402 | CDC25C | 1.23849217   | 0.0002 |
| ENSG00000093009 | CDC45  | 1.46852568   | 1E-05  |
| ENSG00000094804 | CDC6   | 1.776233161  | 1E-07  |
| ENSG00000097046 | CDC7   | 1.056125307  | 0.0002 |
| ENSG00000184661 | CDCA2  | 1.4723619    | 7E-08  |
| ENSG00000170779 | CDCA4  | 1.335089946  | 5E-08  |
| ENSG00000146670 | CDCA5  | 1.968264502  | 7E-07  |
| ENSG00000144354 | CDCA7  | 1.04464115   | 1E-06  |
| ENSG00000134690 | CDCA8  | 1.041895051  | 0.0001 |
| ENSG00000163814 | CDCP1  | 1.24619449   | 9E-09  |
| ENSG00000039068 | CDH1   | 1.063738436  | 1E-06  |
| ENSG00000040731 | CDH10  | -3.732183985 | 0.0054 |
| ENSG00000154162 | CDH12  | -3.363921147 | 4E-05  |
| ENSG00000129910 | CDH15  | 2.301787848  | 0.0402 |
| ENSG00000071991 | CDH19  | -1.592653655 | 4E-11  |
| ENSG00000101542 | CDH20  | -2.894212999 | 1E-11  |
| ENSG00000149654 | CDH22  | -1.589922563 | 0.0032 |
| ENSG00000107736 | CDH23  | -1.580667019 | 1E-12  |
| ENSG00000124215 | CDH26  | 2.010845525  | 1E-06  |
| ENSG00000062038 | CDH3   | 2.308254513  | 3E-11  |
| ENSG00000179242 | CDH4   | -1.894443108 | 0.001  |
| ENSG00000179776 | CDH5   | -1.048506221 | 5E-05  |
| ENSG00000113361 | CDH6   | -1.350594645 | 0.0001 |
| ENSG00000128536 | CDHR3  | -1.096702285 | 2E-05  |
| ENSG00000170312 | CDK1   | 1.308512273  | 1E-06  |
| ENSG00000058091 | CDK14  | -1.675534759 | 1E-16  |
| ENSG00000138395 | CDK15  | -1.173141026 | 0.031  |
| ENSG00000176749 | CDK5R1 | 2.821198692  | 3E-20  |
| ENSG00000134058 | CDK7   | 1.11442049   | 2E-13  |
| ENSG00000124762 | CDKN1A | 1.206434481  | 5E-05  |
| ENSG00000100526 | CDKN3  | 1.801713898  | 9E-08  |
| ENSG00000185267 | CDFN   | -1.27626428  | 1E-05  |
| ENSG00000129596 | CDO1   | -4.28333525  | 2E-19  |
| ENSG00000064309 | CDON   | -1.258786386 | 0.0004 |
| ENSG00000241322 | CDRT1  | 1.653058276  | 0.0011 |
| ENSG00000239704 | CDRT4  | -1.381471537 | 0.004  |
| ENSG00000163624 | CDS1   | 1.100013952  | 2E-16  |
| ENSG00000204539 | CDSN   | 5.469389847  | 4E-12  |



|                 |          |              |        |
|-----------------|----------|--------------|--------|
| ENSG00000167513 | CDT1     | 1.350711116  | 0.0004 |
| ENSG00000079385 | CEACAM1  | -1.562975686 | 6E-07  |
| ENSG00000186567 | CEACAM19 | 2.047357508  | 3E-17  |
| ENSG00000170956 | CEACAM3  | 3.373079225  | 0.0107 |
| ENSG00000105388 | CEACAM5  | -1.38632422  | 8E-05  |
| ENSG00000086548 | CEACAM6  | -1.622271248 | 2E-05  |
| ENSG00000007306 | CEACAM7  | -2.256633355 | 6E-10  |
| ENSG00000170835 | CEL      | -2.130319505 | 5E-06  |
| ENSG00000048740 | CELF2    | -1.544616527 | 3E-12  |
| ENSG00000101489 | CELF4    | -1.037442507 | 0.0299 |
| ENSG00000161082 | CELF5    | -2.075197311 | 4E-06  |
| ENSG00000103888 | CEMIP    | 2.902330883  | 7E-16  |
| ENSG00000205923 | CEMP1    | -2.086834708 | 0.0259 |
| ENSG00000115163 | CENPA    | 1.938591861  | 7E-07  |
| ENSG00000100162 | CENPM    | 1.483203729  | 9E-06  |
| ENSG00000166451 | CENPN    | 1.432019487  | 3E-09  |
| ENSG00000151725 | CENPU    | 1.294525458  | 1E-12  |
| ENSG00000166582 | CENPV    | -1.576578952 | 2E-09  |
| ENSG00000203760 | CENPW    | 1.650983011  | 1E-08  |
| ENSG00000154240 | CEP112   | -1.02565294  | 1E-05  |
| ENSG00000110318 | CEP126   | -2.216798312 | 3E-12  |
| ENSG00000178404 | CEP295NL | -2.144273989 | 7E-05  |
| ENSG00000138180 | CEP55    | 1.796528902  | 3E-10  |
| ENSG00000011523 | CEP68    | -1.092405246 | 4E-08  |
| ENSG00000111860 | CEP85L   | -1.546875953 | 5E-10  |
| ENSG00000154227 | CERS3    | 2.5162654    | 7E-30  |
| ENSG00000198848 | CES1     | -3.979691189 | 2E-21  |
| ENSG00000087237 | CETP     | -1.187497422 | 9E-05  |
| ENSG00000163075 | CFAP221  | -1.777444706 | 0.004  |
| ENSG00000197748 | CFAP43   | -1.596289056 | 0.0023 |
| ENSG00000206530 | CFAP44   | -1.318080442 | 0.0007 |
| ENSG00000172361 | CFAP53   | -1.415883814 | 1E-04  |
| ENSG00000188596 | CFAP54   | 1.573530006  | 0.0331 |
| ENSG00000089101 | CFAP61   | -1.646004338 | 0.0424 |
| ENSG00000105792 | CFAP69   | -1.292889625 | 2E-06  |
| ENSG00000156042 | CFAP70   | -1.701828891 | 3E-06  |
| ENSG00000197766 | CFD      | -2.864060407 | 1E-16  |
| ENSG00000000971 | CFH      | -2.638802392 | 5E-22  |
| ENSG00000172757 | CFL1     | 1.042181299  | 8E-07  |
| ENSG00000165410 | CFL2     | -1.303632865 | 1E-05  |
| ENSG00000001626 | CFTR     | -3.284891622 | 5E-22  |
| ENSG00000164430 | CGAS     | 1.466796325  | 5E-07  |
| ENSG00000128849 | CGNL1    | -2.478601113 | 1E-20  |
| ENSG00000138135 | CH25H    | 2.014602499  | 1E-10  |
| ENSG00000128965 | CHAC1    | 2.353782443  | 3E-05  |
| ENSG00000143942 | CHAC2    | 2.074135067  | 6E-10  |
| ENSG00000136457 | CHAD     | -3.270281184 | 2E-09  |
| ENSG00000100399 | CHADL    | -1.642255917 | 0.0091 |

|                 |         |              |        |
|-----------------|---------|--------------|--------|
| ENSG00000250479 | CHCHD10 | -1.112220786 | 1E-09  |
| ENSG00000116254 | CHD5    | -2.358408777 | 6E-06  |
| ENSG00000124177 | CHD6    | -1.125305381 | 0.0011 |
| ENSG00000016391 | CHDH    | -2.271477297 | 3E-13  |
| ENSG00000149554 | CHEK1   | 1.47481906   | 8E-12  |
| ENSG00000109220 | CHIC2   | 1.15558494   | 3E-06  |
| ENSG00000133063 | CHIT1   | -3.961111462 | 7E-09  |
| ENSG00000110721 | CHKA    | -1.254098298 | 1E-13  |
| ENSG00000111666 | CHPT1   | -1.917559591 | 4E-20  |
| ENSG00000090539 | CHRD    | -1.188041026 | 0.0005 |
| ENSG00000101938 | CHRD1   | -3.858735904 | 8E-14  |
| ENSG00000054938 | CHRD2   | 2.47104331   | 0.0134 |
| ENSG00000168539 | CHRM1   | -3.506643427 | 9E-22  |
| ENSG00000133019 | CHRM3   | -3.32555911  | 3E-15  |
| ENSG00000120903 | CHRNA2  | -5.159846813 | 2E-06  |
| ENSG00000080644 | CHRNA3  | 3.886847942  | 3E-15  |
| ENSG00000169684 | CHRNA5  | 1.722047879  | 0.0001 |
| ENSG00000175344 | CHRNA7  | -1.555188481 | 0.0472 |
| ENSG00000174343 | CHRNA9  | 4.837982588  | 2E-10  |
| ENSG00000117971 | CHRN4   | 2.11778872   | 0.0245 |
| ENSG00000175264 | CHST1   | 1.7253003    | 1E-07  |
| ENSG00000136213 | CHST12  | -1.027975576 | 0.0002 |
| ENSG00000183196 | CHST6   | 1.33344728   | 0.0106 |
| ENSG00000136425 | CIB2    | 1.460911151  | 4E-07  |
| ENSG00000187288 | CIDEC   | -5.212422941 | 7E-10  |
| ENSG00000138615 | CILP    | -4.09508186  | 1E-23  |
| ENSG00000160161 | CILP2   | -2.123893746 | 0.0036 |
| ENSG00000136108 | CKAP2   | 1.237700194  | 2E-11  |
| ENSG00000136026 | CKAP4   | 1.240457214  | 2E-18  |
| ENSG00000131730 | CKMT2   | -2.915018794 | 7E-20  |
| ENSG00000123975 | CKS2    | 2.008716325  | 1E-10  |
| ENSG00000137975 | CLCA2   | 2.225741016  | 1E-19  |
| ENSG00000016602 | CLCA4   | 1.191510533  | 6E-06  |
| ENSG00000188037 | CLCN1   | 3.846258622  | 2E-05  |
| ENSG00000073464 | CLCN4   | -1.542461037 | 1E-06  |
| ENSG00000186510 | CLCNKA  | -3.563592953 | 8E-18  |
| ENSG00000184908 | CLCNKB  | -3.400949755 | 0.0135 |
| ENSG00000134873 | CLDN10  | -2.920829149 | 9E-13  |
| ENSG00000013297 | CLDN11  | -1.498462843 | 0.0005 |
| ENSG00000159261 | CLDN14  | 3.080740662  | 0.0356 |
| ENSG00000113946 | CLDN16  | -1.343189222 | 1E-05  |
| ENSG00000156282 | CLDN17  | 3.156066153  | 0.0255 |
| ENSG00000165376 | CLDN2   | -2.891690853 | 0.0116 |
| ENSG00000177300 | CLDN22  | 4.33028811   | 0.0003 |
| ENSG00000253958 | CLDN23  | -1.68690246  | 5E-12  |
| ENSG00000165215 | CLDN3   | -3.644320197 | 6E-13  |
| ENSG00000234469 | CLDN34  | 2.627557972  | 0.0133 |
| ENSG00000184113 | CLDN5   | -1.791720572 | 3E-12  |

|                 |         |              |        |
|-----------------|---------|--------------|--------|
| ENSG00000181885 | CLDN7   | -1.876884881 | 4E-10  |
| ENSG00000156284 | CLDN8   | -3.163040316 | 8E-16  |
| ENSG00000176435 | CLEC14A | -1.061578673 | 6E-05  |
| ENSG00000236279 | CLEC2L  | -2.036182451 | 0.0097 |
| ENSG00000163815 | CLEC3B  | -3.024304722 | 9E-17  |
| ENSG00000152672 | CLEC4F  | -1.782841878 | 0.0002 |
| ENSG00000172243 | CLEC7A  | 3.320812944  | 1E-29  |
| ENSG00000153132 | CLGN    | -2.492656506 | 5E-10  |
| ENSG00000155962 | CLIC2   | -1.136316598 | 4E-06  |
| ENSG00000169583 | CLIC3   | 2.111430368  | 2E-07  |
| ENSG00000112782 | CLIC5   | -2.838535292 | 5E-15  |
| ENSG00000159212 | CLIC6   | -2.419926351 | 8E-19  |
| ENSG00000105270 | CLIP3   | -1.872669523 | 1E-10  |
| ENSG00000165959 | CLMN    | -1.588736926 | 3E-16  |
| ENSG00000166250 | CLMP    | -1.885752402 | 1E-08  |
| ENSG00000158258 | CLSTN2  | -3.207064224 | 3E-31  |
| ENSG00000175416 | CLTB    | 1.185117302  | 2E-07  |
| ENSG00000120885 | CLU     | -2.880723409 | 2E-24  |
| ENSG00000079101 | CLUL1   | -2.982214998 | 5E-05  |
| ENSG00000177182 | CLVS1   | 1.457829615  | 0.0008 |
| ENSG00000146352 | CLVS2   | -2.507586067 | 7E-05  |
| ENSG00000092009 | CMA1    | -1.262222666 | 0.0096 |
| ENSG00000164237 | CMBL    | -1.928873982 | 2E-10  |
| ENSG00000174600 | CMKLR1  | -1.415715004 | 2E-08  |
| ENSG00000140931 | CMTM3   | -1.015600778 | 5E-07  |
| ENSG00000166091 | CMTM5   | -2.463245069 | 0.0021 |
| ENSG00000153551 | CMTM7   | -1.246837235 | 2E-05  |
| ENSG00000164309 | CMYA5   | -1.055617131 | 0.0063 |
| ENSG00000105427 | CNFN    | 5.199771086  | 7E-21  |
| ENSG00000198515 | CNGA1   | -1.331644543 | 2E-15  |
| ENSG00000070729 | CNGB1   | 5.676470567  | 2E-19  |
| ENSG00000149970 | CNKSR2  | -4.195076314 | 1E-17  |
| ENSG00000130176 | CNN1    | -2.52089964  | 5E-19  |
| ENSG00000064666 | CNN2    | 1.015881739  | 3E-05  |
| ENSG00000119946 | CNNM1   | -1.162895639 | 2E-05  |
| ENSG00000158158 | CNNM4   | 1.112744593  | 4E-08  |
| ENSG00000118432 | CNR1    | -2.073492137 | 6E-07  |
| ENSG00000119865 | CNRIP1  | -1.674630895 | 5E-09  |
| ENSG00000176563 | CNTD1   | -3.252972111 | 0.0131 |
| ENSG00000122756 | CNTFR   | -3.574573831 | 6E-24  |
| ENSG00000184144 | CNTN2   | -3.020226866 | 5E-08  |
| ENSG00000113805 | CNTN3   | -2.315935246 | 5E-06  |
| ENSG00000144619 | CNTN4   | -2.649934198 | 3E-08  |
| ENSG00000134115 | CNTN6   | -2.331884264 | 8E-05  |
| ENSG00000174469 | CNTNAP2 | 3.767052688  | 6E-11  |
| ENSG00000106714 | CNTNAP3 | -1.143871855 | 0.0013 |
| ENSG00000152910 | CNTNAP4 | -3.140529877 | 0.0286 |
| ENSG00000100473 | COCH    | -3.360204468 | 5E-09  |

|                 |          |              |        |
|-----------------|----------|--------------|--------|
| ENSG00000060718 | COL11A1  | -1.61571235  | 0.0005 |
| ENSG00000204248 | COL11A2  | -1.19756327  | 0.0319 |
| ENSG00000111799 | COL12A1  | -1.158947224 | 4E-05  |
| ENSG00000187955 | COL14A1  | -1.165384931 | 0.0138 |
| ENSG00000124749 | COL21A1  | -1.77282566  | 3E-06  |
| ENSG00000171502 | COL24A1  | -1.171039794 | 0.0117 |
| ENSG00000188517 | COL25A1  | -2.610644249 | 2E-14  |
| ENSG00000160963 | COL26A1  | -1.507801125 | 0.0265 |
| ENSG00000215018 | COL28A1  | -1.442671215 | 3E-06  |
| ENSG00000169031 | COL4A3   | -1.509760846 | 0.0048 |
| ENSG00000144810 | COL8A1   | -2.096818945 | 3E-11  |
| ENSG00000112280 | COL9A1   | -2.590021478 | 0.0003 |
| ENSG00000049089 | COL9A2   | -1.827298072 | 4E-08  |
| ENSG00000214290 | COLCA2   | -2.73686296  | 0.0008 |
| ENSG00000118004 | COLEC11  | -1.788020675 | 0.0002 |
| ENSG00000158270 | COLEC12  | -1.597699827 | 4E-10  |
| ENSG00000198756 | COLGALT2 | -1.574121688 | 0.0003 |
| ENSG00000169019 | COMMD8   | 1.17950365   | 2E-06  |
| ENSG00000165644 | COMTD1   | 1.071954975  | 1E-04  |
| ENSG00000172428 | COPS9    | 1.133929578  | 7E-08  |
| ENSG00000173085 | COQ2     | 1.164146352  | 5E-10  |
| ENSG00000163050 | COQ8A    | -1.57422346  | 1E-15  |
| ENSG00000103647 | CORO2B   | -2.150947656 | 2E-16  |
| ENSG00000160471 | COX6B2   | -1.2006848   | 0.0195 |
| ENSG00000161281 | COX7A1   | -2.160820811 | 5E-24  |
| ENSG00000047457 | CP       | -2.997568565 | 9E-13  |
| ENSG00000091704 | CPA1     | -2.050318974 | 0.0334 |
| ENSG00000128510 | CPA4     | 2.515113692  | 6E-20  |
| ENSG00000165078 | CPA6     | 4.309572474  | 4E-07  |
| ENSG00000160111 | CPAMD8   | -2.035833118 | 1E-10  |
| ENSG00000153002 | CPB1     | -4.409976467 | 3E-09  |
| ENSG00000109472 | CPE      | -1.761649791 | 5E-10  |
| ENSG00000214575 | CPEB1    | -1.31764523  | 0.0008 |
| ENSG00000137449 | CPEB2    | 1.089017115  | 4E-10  |
| ENSG00000106034 | CPED1    | -2.998459574 | 1E-18  |
| ENSG00000100884 | CPNE6    | -2.23855607  | 0.0463 |
| ENSG00000144410 | CPO      | -2.272076325 | 0.0064 |
| ENSG00000104324 | CPQ      | -1.31590573  | 3E-09  |
| ENSG00000187959 | CPSF4L   | -2.717280208 | 0.0357 |
| ENSG00000143320 | CRABP2   | 1.56805307   | 1E-07  |
| ENSG00000130038 | CRACR2A  | -3.238898519 | 1E-18  |
| ENSG00000177685 | CRACR2B  | -2.776698585 | 1E-15  |
| ENSG00000169509 | CRCT1    | 4.242312376  | 4E-14  |
| ENSG00000143578 | CREB3L4  | -1.077262148 | 4E-14  |
| ENSG00000146592 | CREB5    | -1.232917133 | 0.0008 |
| ENSG00000175874 | CREG2    | 3.348828334  | 3E-11  |
| ENSG00000145708 | CRHBP    | -3.310891849 | 4E-10  |
| ENSG00000150938 | CRIM1    | -1.433744634 | 4E-12  |

|                 |          |              |        |
|-----------------|----------|--------------|--------|
| ENSG00000213145 | CRIP1    | -1.503620409 | 0.0035 |
| ENSG00000146215 | CRIP3    | -3.112347788 | 0.0002 |
| ENSG00000124490 | CRISP2   | -3.631932435 | 1E-08  |
| ENSG00000096006 | CRISP3   | -2.182128619 | 6E-11  |
| ENSG00000121005 | CRISPLD1 | -2.174241342 | 2E-22  |
| ENSG00000006016 | CRLF1    | 1.013935798  | 0.0006 |
| ENSG00000072832 | CRMP1    | 1.275746805  | 0.0047 |
| ENSG00000143536 | CRNN     | 2.021820908  | 0.006  |
| ENSG00000170275 | CRTAP    | -1.058544921 | 9E-10  |
| ENSG00000121671 | CRY2     | -1.318515009 | 9E-09  |
| ENSG00000109846 | CRYAB    | -1.628070902 | 1E-08  |
| ENSG00000112297 | CRYBG1   | 1.23139348   | 5E-13  |
| ENSG00000176092 | CRYBG2   | 1.197005399  | 9E-07  |
| ENSG00000172346 | CSDC2    | -1.390976574 | 0.0052 |
| ENSG00000182578 | CSF1R    | -1.010691366 | 3E-05  |
| ENSG00000183117 | CSMD1    | -2.079774806 | 0.0006 |
| ENSG00000126545 | CSN1S1   | -4.116786309 | 0.0011 |
| ENSG00000070770 | CSNK2A2  | 1.457051514  | 5E-14  |
| ENSG00000178662 | CSRNP3   | -1.165370464 | 0.0012 |
| ENSG00000159176 | CSRP1    | -1.085023284 | 3E-10  |
| ENSG00000175183 | CSRP2    | 1.289057506  | 3E-06  |
| ENSG00000175315 | CST6     | 3.342857032  | 5E-07  |
| ENSG00000121552 | CSTA     | 4.239881724  | 4E-33  |
| ENSG00000160213 | CSTB     | 1.918636105  | 4E-07  |
| ENSG00000101811 | CSTF2    | 1.045083423  | 4E-09  |
| ENSG00000150281 | CTF1     | -1.111342006 | 0.0023 |
| ENSG00000118523 | CTGF     | -1.930443878 | 5E-12  |
| ENSG00000116761 | CTH      | 1.556858125  | 0.0022 |
| ENSG00000183230 | CTNNA3   | -3.729369509 | 1E-06  |
| ENSG00000178585 | CTNNBIP1 | 1.594568018  | 3E-08  |
| ENSG00000169862 | CTNND2   | -1.808539896 | 9E-05  |
| ENSG00000171793 | CTPS1    | 1.218000733  | 4E-10  |
| ENSG00000109861 | CTSC     | 1.494741923  | 6E-08  |
| ENSG00000174080 | CTSF     | -1.608143697 | 3E-17  |
| ENSG00000136943 | CTSV     | 1.485406635  | 7E-05  |
| ENSG00000101160 | CTSZ     | -1.068258323 | 1E-09  |
| ENSG00000077063 | CTTNBP2  | -1.230373812 | 0.0011 |
| ENSG00000109182 | CWH43    | 1.778568413  | 6E-19  |
| ENSG00000006210 | CX3CL1   | -2.356267889 | 4E-19  |
| ENSG00000154639 | CXADR    | 1.094682936  | 7E-06  |
| ENSG00000163739 | CXCL1    | 2.615015592  | 4E-06  |
| ENSG00000169245 | CXCL10   | 1.483945304  | 0.0092 |
| ENSG00000107562 | CXCL12   | -1.885077863 | 3E-08  |
| ENSG00000189377 | CXCL17   | 2.10452666   | 0.0002 |
| ENSG00000163735 | CXCL5    | 1.907574007  | 0.0367 |
| ENSG00000169429 | CXCL8    | 5.974994482  | 2E-09  |
| ENSG00000163464 | CXCR1    | 3.920830492  | 4E-15  |
| ENSG00000180871 | CXCR2    | 1.770593949  | 2E-05  |

|                 |          |              |        |
|-----------------|----------|--------------|--------|
| ENSG00000147113 | CXorf36  | -1.264928635 | 3E-07  |
| ENSG00000147231 | CXorf57  | -1.132014708 | 0.0013 |
| ENSG00000168772 | CXXC4    | -2.814943756 | 1E-12  |
| ENSG00000165168 | CYBB     | -1.203875601 | 9E-07  |
| ENSG00000071967 | CYBRD1   | -2.227216486 | 2E-14  |
| ENSG00000161544 | CYGB     | -1.677011257 | 1E-10  |
| ENSG00000140459 | CYP11A1  | -2.446486095 | 4E-06  |
| ENSG00000140465 | CYP1A1   | -2.272582042 | 1E-06  |
| ENSG00000140505 | CYP1A2   | -2.928977721 | 0.0099 |
| ENSG00000138061 | CYP1B1   | -1.129798939 | 0.0004 |
| ENSG00000019186 | CYP24A1  | 3.981958456  | 2E-09  |
| ENSG00000135929 | CYP27A1  | -1.694965284 | 4E-16  |
| ENSG00000111012 | CYP27B1  | 2.236033966  | 4E-06  |
| ENSG00000186684 | CYP27C1  | 1.205639772  | 8E-08  |
| ENSG00000255974 | CYP2A6   | -3.61496365  | 0.0063 |
| ENSG00000108242 | CYP2C18  | 1.727704329  | 0.0004 |
| ENSG00000100197 | CYP2D6   | -1.308593489 | 0.0224 |
| ENSG00000155016 | CYP2U1   | -1.456377645 | 3E-10  |
| ENSG00000073067 | CYP2W1   | -1.682958966 | 0.0006 |
| ENSG00000036530 | CYP46A1  | -1.655556301 | 1E-06  |
| ENSG00000187048 | CYP4A11  | -3.663086265 | 0.0005 |
| ENSG00000142973 | CYP4B1   | -1.16393659  | 5E-05  |
| ENSG00000171903 | CYP4F11  | 2.667575309  | 2E-05  |
| ENSG00000171954 | CYP4F22  | 2.753326874  | 9E-16  |
| ENSG00000186526 | CYP4F8   | -1.760831897 | 0.0278 |
| ENSG00000145476 | CYP4V2   | -1.572426243 | 2E-08  |
| ENSG00000186377 | CYP4X1   | -1.898025623 | 1E-13  |
| ENSG00000186160 | CYP4Z1   | -1.938179726 | 0.0213 |
| ENSG00000172817 | CYP7B1   | 1.172934594  | 4E-05  |
| ENSG00000205795 | CYS1     | -1.270919641 | 0.0004 |
| ENSG00000173198 | CYSLTR1  | -1.388180054 | 0.0004 |
| ENSG00000197191 | CYSRT1   | 4.195257008  | 2E-14  |
| ENSG00000120306 | CYSTM1   | -1.500277997 | 1E-10  |
| ENSG00000146122 | DAAM2    | -1.678404726 | 2E-08  |
| ENSG00000153071 | DAB2     | -1.37892513  | 1E-07  |
| ENSG00000276644 | DACH1    | -1.014113133 | 0.0014 |
| ENSG00000165617 | DACT1    | -2.187321248 | 3E-15  |
| ENSG00000164488 | DACT2    | -1.354703745 | 0.0005 |
| ENSG00000197380 | DACT3    | -1.198414844 | 3E-07  |
| ENSG00000134780 | DAGLA    | -1.735854141 | 9E-09  |
| ENSG00000196730 | DAPK1    | -1.654894272 | 1E-09  |
| ENSG00000163331 | DAPL1    | 1.048871244  | 0.0003 |
| ENSG00000070190 | DAPP1    | 1.081893072  | 4E-06  |
| ENSG00000006634 | DBF4     | 1.011826147  | 6E-09  |
| ENSG00000113758 | DBN1     | -1.631583056 | 2E-16  |
| ENSG00000185610 | DBX2     | -4.514227688 | 3E-08  |
| ENSG00000198354 | DCAF12L2 | -4.45704329  | 4E-05  |
| ENSG00000164934 | DCAF13   | 1.019727508  | 2E-07  |

|                 |         |              |        |
|-----------------|---------|--------------|--------|
| ENSG00000161634 | DCD     | -4.208536879 | 1E-13  |
| ENSG00000170959 | DCDC1   | -3.642211848 | 3E-06  |
| ENSG00000146038 | DCDC2   | -1.158076821 | 0.0237 |
| ENSG00000166341 | DCHS1   | -1.101029986 | 0.0038 |
| ENSG00000133083 | DCLK1   | -2.091936061 | 5E-08  |
| ENSG00000170390 | DCLK2   | -1.197446639 | 8E-05  |
| ENSG00000011465 | DCN     | -1.760217638 | 5E-07  |
| ENSG00000163357 | DCST1   | -1.322739311 | 0.014  |
| ENSG00000163354 | DCST2   | -2.058764335 | 7E-08  |
| ENSG00000164935 | DCSTAMP | -3.657454583 | 0.0002 |
| ENSG00000080166 | DCT     | -1.191735073 | 0.0027 |
| ENSG00000137692 | DCUN1D5 | 1.310092518  | 1E-07  |
| ENSG00000077279 | DCX     | -2.86026169  | 1E-06  |
| ENSG00000153904 | DDAH1   | -1.49509403  | 4E-06  |
| ENSG00000165490 | DDIAS   | 1.562496851  | 4E-06  |
| ENSG00000145358 | DDIT4L  | -2.348439678 | 2E-15  |
| ENSG00000181418 | DDN     | 2.097091162  | 0.0018 |
| ENSG00000203797 | DDO     | -2.248271789 | 0.0003 |
| ENSG00000162733 | DDR2    | -2.377710192 | 1E-22  |
| ENSG00000109832 | DDX25   | -1.941238224 | 3E-05  |
| ENSG00000107201 | DDX58   | 1.278247319  | 4E-11  |
| ENSG00000181381 | DDX60L  | 1.087775839  | 3E-06  |
| ENSG00000186458 | DEFB132 | -5.381611062 | 1E-14  |
| ENSG00000171711 | DEFB4A  | 8.865686515  | 3E-08  |
| ENSG00000143753 | DEGS1   | 1.159662838  | 3E-07  |
| ENSG00000168350 | DEGS2   | 1.747952364  | 6E-06  |
| ENSG00000146966 | DENND2A | -2.595292192 | 2E-13  |
| ENSG00000175984 | DENND2C | 1.215326617  | 1E-14  |
| ENSG00000162777 | DENND2D | 1.088772053  | 1E-10  |
| ENSG00000105339 | DENND3  | -1.170593312 | 6E-06  |
| ENSG00000170456 | DENND5B | -1.208181117 | 8E-10  |
| ENSG00000024526 | DEPDC1  | 1.648401274  | 7E-08  |
| ENSG00000035499 | DEPDC1B | 2.109081108  | 3E-09  |
| ENSG00000165507 | DEPP1   | -2.011307586 | 1E-14  |
| ENSG00000175084 | DES     | -2.076407243 | 3E-06  |
| ENSG00000140543 | DET1    | -1.215857037 | 3E-13  |
| ENSG00000058866 | DGKG    | -2.18999142  | 7E-16  |
| ENSG00000157680 | DGKI    | -1.707677718 | 1E-05  |
| ENSG00000157379 | DHRS1   | 1.28201073   | 5E-08  |
| ENSG00000197406 | DIO3    | -2.703817061 | 8E-05  |
| ENSG00000151240 | DIP2C   | -1.113348958 | 4E-10  |
| ENSG00000165023 | DIRAS2  | -1.640540047 | 0.0016 |
| ENSG00000154309 | DISP1   | -1.060588502 | 2E-06  |
| ENSG00000150764 | DIXDC1  | -1.658388257 | 6E-18  |
| ENSG00000107984 | DKK1    | -2.272894319 | 2E-06  |
| ENSG00000155011 | DKK2    | -2.770200079 | 2E-07  |
| ENSG00000164741 | DLC1    | -1.761854588 | 1E-12  |
| ENSG00000008226 | DLEC1   | -1.995105319 | 1E-08  |

|                 |          |              |        |
|-----------------|----------|--------------|--------|
| ENSG00000186047 | DLEU7    | -3.088268307 | 0.0221 |
| ENSG00000116544 | DLGAP3   | 1.990649555  | 0.0005 |
| ENSG00000126787 | DLGAP5   | 2.23259043   | 1E-08  |
| ENSG00000128917 | DLL4     | -1.063995047 | 0.0075 |
| ENSG00000105880 | DLX5     | 1.547859444  | 3E-06  |
| ENSG00000006377 | DLX6     | 2.02958981   | 0.0012 |
| ENSG00000198947 | DMD      | -1.437515073 | 8E-18  |
| ENSG00000132837 | DMGDH    | -1.462510753 | 0.0015 |
| ENSG00000161249 | DMKN     | 1.251384745  | 4E-07  |
| ENSG00000173253 | DMRT2    | -2.229000058 | 0.0065 |
| ENSG00000167646 | DNAAF3   | 1.50074858   | 0.0054 |
| ENSG00000114841 | DNAH1    | -1.115659343 | 6E-05  |
| ENSG00000250091 | DNAH10OS | -1.834161298 | 3E-09  |
| ENSG00000105877 | DNAH11   | -2.494522938 | 3E-07  |
| ENSG00000039139 | DNAH5    | -1.241008566 | 0.0083 |
| ENSG00000115423 | DNAH6    | -1.546702829 | 0.0138 |
| ENSG00000118997 | DNAH7    | -1.534827345 | 0.0011 |
| ENSG00000105993 | DNAJB6   | 1.275176604  | 6E-09  |
| ENSG00000178401 | DNAJC22  | -1.203744726 | 0.0141 |
| ENSG00000116675 | DNAJC6   | -1.31805234  | 6E-07  |
| ENSG00000163879 | DNALI1   | -2.015968541 | 5E-09  |
| ENSG00000167968 | DNASE1L2 | 2.072029012  | 4E-06  |
| ENSG00000163687 | DNASE1L3 | 1.033242102  | 2E-05  |
| ENSG00000137976 | DNASE2B  | -3.643248238 | 0.0068 |
| ENSG00000187957 | DNER     | -2.28699142  | 6E-24  |
| ENSG00000106976 | DNM1     | -1.370240287 | 7E-06  |
| ENSG00000088305 | DNMT3B   | 1.878100641  | 6E-16  |
| ENSG00000147251 | DOCK11   | -1.167354308 | 4E-05  |
| ENSG00000115325 | DOK1     | -1.604714392 | 2E-13  |
| ENSG00000147443 | DOK2     | -1.40721491  | 0.0035 |
| ENSG00000125170 | DOK4     | 1.075648461  | 1E-05  |
| ENSG00000101134 | DOK5     | -1.579336468 | 8E-07  |
| ENSG00000206052 | DOK6     | -2.124193664 | 3E-07  |
| ENSG00000166171 | DPCD     | 1.104177554  | 7E-06  |
| ENSG00000015413 | DPEP1    | -2.5498153   | 0.001  |
| ENSG00000011332 | DPF1     | 2.663480444  | 1E-10  |
| ENSG00000175497 | DPP10    | -1.999211281 | 0.0139 |
| ENSG00000130226 | DPP6     | -1.628756362 | 0.0043 |
| ENSG00000143196 | DPT      | -3.174925952 | 1E-22  |
| ENSG00000092964 | DPYSL2   | -1.191672041 | 2E-07  |
| ENSG00000113657 | DPYSL3   | -1.599809899 | 3E-09  |
| ENSG00000175550 | DRAP1    | 1.331776413  | 3E-07  |
| ENSG00000162490 | DRAXIN   | -1.891624572 | 0.0002 |
| ENSG00000171962 | DRC3     | -1.268839188 | 0.0002 |
| ENSG00000184845 | DRD1     | -2.293143167 | 6E-05  |
| ENSG00000149295 | DRD2     | -2.100630512 | 0.0007 |
| ENSG00000069696 | DRD4     | -3.79439706  | 2E-07  |
| ENSG00000189269 | DRICH1   | -1.080402924 | 0.0483 |



|                 |           |              |        |
|-----------------|-----------|--------------|--------|
| ENSG00000134765 | DSC1      | 2.919575573  | 8E-19  |
| ENSG00000134755 | DSC2      | 2.928507371  | 6E-09  |
| ENSG00000134762 | DSC3      | 1.202265611  | 1E-12  |
| ENSG00000177103 | DSCAML1   | -1.861744072 | 0.0054 |
| ENSG00000171451 | DSEL      | -1.554726483 | 8E-11  |
| ENSG00000134760 | DSG1      | 2.636359705  | 6E-23  |
| ENSG00000046604 | DSG2      | -1.422578269 | 3E-09  |
| ENSG00000134757 | DSG3      | 2.015057237  | 7E-12  |
| ENSG00000096696 | DSP       | 1.120477049  | 4E-14  |
| ENSG00000143476 | DTL       | 1.126945469  | 6E-05  |
| ENSG00000134769 | DTNA      | -2.042990486 | 3E-11  |
| ENSG00000135144 | DTX1      | -3.186128451 | 3E-19  |
| ENSG00000110042 | DTX4      | -1.338682237 | 2E-06  |
| ENSG00000137857 | DUOX1     | 1.303248821  | 2E-09  |
| ENSG00000140254 | DUOXA1    | 1.506656587  | 4E-12  |
| ENSG00000079393 | DUSP13    | 2.515025452  | 0.0138 |
| ENSG00000276023 | DUSP14    | 2.155191302  | 5E-17  |
| ENSG00000158050 | DUSP2     | 1.207542903  | 0.0231 |
| ENSG00000120875 | DUSP4     | -1.090271495 | 0.0002 |
| ENSG00000138166 | DUSP5     | 1.052912307  | 0.0003 |
| ENSG00000164086 | DUSP7     | 1.042714396  | 0.0003 |
| ENSG00000130829 | DUSP9     | 3.367375726  | 2E-06  |
| ENSG00000178690 | DYNAP     | 3.253624333  | 0.0045 |
| ENSG00000158560 | DYNC111   | -1.994440305 | 1E-13  |
| ENSG00000187240 | DYNC2H1   | -1.05955261  | 0.0002 |
| ENSG00000088986 | DYNLL1    | 2.036455529  | 6E-15  |
| ENSG00000165169 | DYNLT3    | 1.256110645  | 2E-06  |
| ENSG00000158163 | DZIP1L    | -1.806383601 | 1E-05  |
| ENSG00000198919 | DZIP3     | -1.012660161 | 0.0035 |
| ENSG00000165891 | E2F7      | 1.619326013  | 1E-05  |
| ENSG00000129173 | E2F8      | 1.145839399  | 0.0001 |
| ENSG00000164330 | EBF1      | -2.234356341 | 5E-15  |
| ENSG00000221818 | EBF2      | -1.942628202 | 4E-13  |
| ENSG00000108001 | EBF3      | -1.743458501 | 2E-08  |
| ENSG00000143369 | ECM1      | 1.285699577  | 1E-08  |
| ENSG00000106823 | ECM2      | -2.475421542 | 2E-15  |
| ENSG00000114346 | ECT2      | 1.415192672  | 2E-10  |
| ENSG00000203734 | ECT2L     | -2.101278663 | 0.0006 |
| ENSG00000158813 | EDA       | -1.397242409 | 7E-13  |
| ENSG00000131080 | EDA2R     | -1.002069319 | 0.0135 |
| ENSG00000135960 | EDAR      | -2.638083613 | 3E-19  |
| ENSG00000124205 | EDN3      | -3.533657636 | 8E-08  |
| ENSG00000284753 | EEF1AKMT4 | 1.973241309  | 0.0003 |
| ENSG00000114942 | EEF1B2    | 1.089526142  | 2E-07  |
| ENSG00000172771 | EFCAB12   | -2.377166713 | 0.0023 |
| ENSG00000178852 | EFCAB13   | -1.434489613 | 6E-06  |
| ENSG00000186976 | EFCAB6    | -1.211561175 | 0.0007 |
| ENSG00000115380 | EFEMP1    | -1.52754328  | 2E-10  |

|                 |          |              |        |
|-----------------|----------|--------------|--------|
| ENSG00000172638 | EFEMP2   | -1.433638043 | 9E-12  |
| ENSG00000115468 | EFHD1    | -2.717811499 | 2E-29  |
| ENSG00000084710 | EFR3B    | 1.244547695  | 0.001  |
| ENSG00000138798 | EGF      | -1.942947909 | 2E-10  |
| ENSG00000198759 | EGFL6    | -2.473417032 | 3E-08  |
| ENSG00000172889 | EGFL7    | -1.153587128 | 2E-07  |
| ENSG00000241404 | EGFL8    | -1.099299081 | 0.0059 |
| ENSG00000179388 | EGR3     | 1.038191339  | 0.0004 |
| ENSG00000176401 | EID2B    | -1.525933542 | 4E-05  |
| ENSG00000141543 | EIF4A3   | 1.296079531  | 3E-10  |
| ENSG00000151247 | EIF4E    | 1.125856201  | 3E-07  |
| ENSG00000187840 | EIF4EBP1 | 2.111500155  | 3E-10  |
| ENSG00000132507 | EIF5A    | 1.503087726  | 1E-11  |
| ENSG00000253626 | EIF5AL1  | 1.486620843  | 5E-06  |
| ENSG00000242372 | EIF6     | 1.591821732  | 5E-10  |
| ENSG00000197561 | ELANE    | -3.185914472 | 7E-11  |
| ENSG00000196361 | ELAVL3   | 3.142696828  | 0.0007 |
| ENSG00000163435 | ELF3     | -1.608768661 | 4E-07  |
| ENSG00000135374 | ELF5     | -1.903552542 | 3E-13  |
| ENSG00000166897 | ELFN2    | -1.782694518 | 0.0004 |
| ENSG00000118985 | ELL2     | 1.922425689  | 2E-16  |
| ENSG00000155849 | ELMO1    | -1.010986473 | 1E-08  |
| ENSG00000110675 | ELMOD1   | 1.886268252  | 2E-11  |
| ENSG00000049540 | ELN      | -1.884606888 | 1E-08  |
| ENSG00000066322 | ELOVL1   | 1.367827815  | 2E-05  |
| ENSG00000197977 | ELOVL2   | -2.915989517 | 0.0014 |
| ENSG00000118402 | ELOVL4   | 2.38227674   | 6E-18  |
| ENSG00000012660 | ELOVL5   | -1.398811964 | 8E-06  |
| ENSG00000164181 | ELOVL7   | 2.218818898  | 4E-25  |
| ENSG00000164035 | EMCN     | -1.036420607 | 0.0007 |
| ENSG00000138080 | EMILIN1  | -1.333745365 | 0.0001 |
| ENSG00000132205 | EMILIN2  | -1.424355227 | 9E-08  |
| ENSG00000183798 | EMILIN3  | -2.432834576 | 8E-08  |
| ENSG00000066629 | EML1     | 1.368212104  | 3E-13  |
| ENSG00000214595 | EML6     | 1.227999914  | 2E-06  |
| ENSG00000170370 | EMX2     | -1.713372153 | 2E-12  |
| ENSG00000163064 | EN1      | -1.281854634 | 4E-10  |
| ENSG00000154380 | ENAH     | 1.260087096  | 3E-08  |
| ENSG00000111405 | ENDOU    | 2.075893118  | 1E-15  |
| ENSG00000168913 | ENHO     | -2.882560935 | 1E-11  |
| ENSG00000074800 | ENO1     | 1.107606988  | 1E-05  |
| ENSG00000120658 | ENOX1    | -1.457325985 | 6E-07  |
| ENSG00000197594 | ENPP1    | -2.792763018 | 1E-12  |
| ENSG00000136960 | ENPP2    | -2.167821651 | 6E-13  |
| ENSG00000154269 | ENPP3    | -1.670225119 | 9E-06  |
| ENSG00000001561 | ENPP4    | -2.779464298 | 6E-21  |
| ENSG00000112796 | ENPP5    | -2.727187693 | 4E-15  |
| ENSG00000198018 | ENTPD7   | 1.284265939  | 3E-06  |

|                 |            |              |        |
|-----------------|------------|--------------|--------|
| ENSG00000088367 | EPB41L1    | -1.476002073 | 2E-16  |
| ENSG00000079819 | EPB41L2    | -1.827471908 | 1E-17  |
| ENSG00000166947 | EPB42      | -5.006067721 | 9E-09  |
| ENSG00000119888 | EPCAM      | -1.452564169 | 4E-09  |
| ENSG00000086289 | EPDR1      | -2.679712686 | 3E-33  |
| ENSG00000182585 | EPGN       | 6.765688944  | 1E-15  |
| ENSG00000146904 | EPHA1      | 1.304730664  | 1E-09  |
| ENSG00000044524 | EPHA3      | -1.879322813 | 1E-06  |
| ENSG00000135333 | EPHA7      | -2.489501768 | 3E-09  |
| ENSG00000070886 | EPHA8      | 4.046898009  | 0.0219 |
| ENSG00000154928 | EPHB1      | -1.550631973 | 3E-12  |
| ENSG00000143819 | EPHX1      | -1.612839821 | 7E-17  |
| ENSG00000105131 | EPHX3      | 3.102708223  | 1E-14  |
| ENSG00000172031 | EPHX4      | -1.776993571 | 0.0001 |
| ENSG00000049283 | EPN3       | 1.683891048  | 3E-10  |
| ENSG00000130427 | EPO        | 2.916555136  | 4E-05  |
| ENSG00000273604 | EPOP       | 1.566084331  | 4E-06  |
| ENSG00000151491 | EPS8       | -1.605869121 | 2E-12  |
| ENSG00000131037 | EPS8L1     | 1.035372106  | 3E-05  |
| ENSG00000133106 | EPST11     | 1.373958778  | 7E-08  |
| ENSG00000178568 | ERBB4      | -3.324108043 | 8E-17  |
| ENSG00000187672 | ERC2       | 2.460855651  | 0.0079 |
| ENSG00000186871 | ERCC6L     | 1.893412084  | 7E-07  |
| ENSG00000124882 | EREG       | 3.41955552   | 5E-29  |
| ENSG00000178752 | ERFE       | 2.915411627  | 0.0003 |
| ENSG00000204334 | ERICH2     | -2.333442806 | 0.0106 |
| ENSG00000178965 | ERICH3     | -2.167049048 | 0.0323 |
| ENSG00000134398 | ERN2       | -2.659625701 | 4E-05  |
| ENSG00000197930 | ERO1A      | 1.183691145  | 1E-06  |
| ENSG00000086619 | ERO1B      | -1.262665769 | 6E-05  |
| ENSG00000244476 | ERVFRD-1   | -2.413519137 | 0.0173 |
| ENSG00000226887 | ERVMER34-1 | 2.83880509   | 1E-13  |
| ENSG00000242950 | ERVW-1     | 3.320811009  | 0.0086 |
| ENSG00000171320 | ESCO2      | 1.102731724  | 0.0028 |
| ENSG00000135476 | ESPL1      | 1.10771026   | 8E-05  |
| ENSG00000140009 | ESR2       | -2.02071479  | 0.0012 |
| ENSG00000104413 | ESRP1      | 1.543590333  | 4E-17  |
| ENSG00000103067 | ESRP2      | 1.381482143  | 2E-09  |
| ENSG00000196482 | ESRRG      | -3.397472627 | 2E-14  |
| ENSG00000158220 | ESYT3      | 1.56187717   | 1E-10  |
| ENSG00000143845 | ETNK2      | -1.487283482 | 4E-11  |
| ENSG00000006468 | ETV1       | -1.617660009 | 1E-10  |
| ENSG00000115363 | EVA1A      | -1.237493021 | 5E-05  |
| ENSG00000214860 | EVPLL      | 1.432148114  | 0.0036 |
| ENSG00000174371 | EXO1       | 1.638579382  | 2E-06  |
| ENSG00000107371 | EXOSC3     | 1.029776125  | 5E-06  |
| ENSG00000158008 | EXTL1      | -3.166414758 | 3E-10  |
| ENSG00000112319 | EYA4       | -3.224948298 | 0.0003 |

|                 |          |              |        |
|-----------------|----------|--------------|--------|
| ENSG00000188107 | EYS      | -2.979817309 | 0.0004 |
| ENSG00000126218 | F10      | -2.539822544 | 3E-10  |
| ENSG00000131187 | F12      | 2.661750546  | 6E-15  |
| ENSG00000124491 | F13A1    | -1.57178877  | 9E-05  |
| ENSG00000164251 | F2RL1    | 2.042157148  | 1E-09  |
| ENSG00000198734 | F5       | -2.810309774 | 4E-11  |
| ENSG00000057593 | F7       | -1.648734196 | 0.0228 |
| ENSG00000185010 | F8       | -1.750073985 | 2E-15  |
| ENSG00000103089 | FA2H     | -1.310686187 | 0.0068 |
| ENSG00000165591 | FAAH2    | 1.125279301  | 5E-07  |
| ENSG00000121769 | FABP3    | -2.58025638  | 1E-09  |
| ENSG00000170323 | FABP4    | -4.009317769 | 9E-16  |
| ENSG00000164687 | FABP5    | 3.962294238  | 1E-43  |
| ENSG00000170231 | FABP6    | 2.59552918   | 0.0061 |
| ENSG00000164434 | FABP7    | -2.176290049 | 0.0055 |
| ENSG00000149485 | FADS1    | -1.283562885 | 0.0035 |
| ENSG00000134824 | FADS2    | -1.649842105 | 0.0113 |
| ENSG00000221968 | FADS3    | -1.964151771 | 1E-13  |
| ENSG00000172782 | FADS6    | 1.554204551  | 2E-06  |
| ENSG00000103876 | FAH      | -1.118768056 | 2E-06  |
| ENSG00000135472 | FAIM2    | 1.268441868  | 0.0014 |
| ENSG00000168309 | FAM107A  | -2.212869652 | 2E-17  |
| ENSG00000125898 | FAM110A  | 1.369247527  | 2E-05  |
| ENSG00000169122 | FAM110B  | -1.446889472 | 3E-05  |
| ENSG00000184731 | FAM110C  | 2.071056901  | 1E-16  |
| ENSG00000197245 | FAM110D  | -1.216753498 | 4E-05  |
| ENSG00000189057 | FAM111B  | 1.367711166  | 9E-05  |
| ENSG00000121104 | FAM117A  | -1.295852981 | 2E-12  |
| ENSG00000185519 | FAM131C  | 1.612397461  | 0.0038 |
| ENSG00000179083 | FAM133A  | -3.222856434 | 4E-09  |
| ENSG00000082269 | FAM135A  | 1.033506869  | 2E-13  |
| ENSG00000138640 | FAM13A   | -1.717896981 | 1E-16  |
| ENSG00000109794 | FAM149A  | -2.302680381 | 1E-16  |
| ENSG00000152380 | FAM151B  | 1.441468016  | 2E-07  |
| ENSG00000170074 | FAM153A  | -1.011014533 | 0.0451 |
| ENSG00000204677 | FAM153C  | -1.864182088 | 0.0024 |
| ENSG00000170264 | FAM161A  | -1.050226382 | 0.0043 |
| ENSG00000156050 | FAM161B  | -1.316107484 | 2E-12  |
| ENSG00000114023 | FAM162A  | 1.691124561  | 4E-13  |
| ENSG00000215187 | FAM166B  | -2.267673151 | 5E-06  |
| ENSG00000148468 | FAM171A1 | -1.054993189 | 3E-08  |
| ENSG00000185442 | FAM174B  | -1.492075764 | 3E-12  |
| ENSG00000189320 | FAM180A  | -1.530395676 | 0.0001 |
| ENSG00000196666 | FAM180B  | -3.911361315 | 5E-15  |
| ENSG00000111879 | FAM184A  | -2.155481583 | 9E-08  |
| ENSG00000104059 | FAM189A1 | -2.099657722 | 0.0002 |
| ENSG00000135063 | FAM189A2 | -2.48101888  | 2E-30  |
| ENSG00000204767 | FAM196B  | -2.305248805 | 0.0012 |

|                 |         |              |        |
|-----------------|---------|--------------|--------|
| ENSG00000164125 | FAM198B | -1.43682977  | 4E-07  |
| ENSG00000198673 | FAM19A2 | -1.649083739 | 0.0006 |
| ENSG00000219438 | FAM19A5 | -1.931616269 | 7E-08  |
| ENSG00000250486 | FAM218A | -1.634247716 | 0.035  |
| ENSG00000188732 | FAM221A | -1.800381767 | 6E-10  |
| ENSG00000204930 | FAM221B | -3.078356564 | 0.002  |
| ENSG00000184949 | FAM227A | -1.213876088 | 0.0016 |
| ENSG00000166262 | FAM227B | -1.021319396 | 3E-05  |
| ENSG00000186453 | FAM228A | -2.052869689 | 0.0017 |
| ENSG00000219626 | FAM228B | -1.545477663 | 5E-09  |
| ENSG00000203778 | FAM229B | -1.142663922 | 1E-07  |
| ENSG00000188100 | FAM25A  | 3.393634948  | 2E-11  |
| ENSG00000276430 | FAM25C  | 3.175082652  | 3E-05  |
| ENSG00000183844 | FAM3B   | -2.671581872 | 1E-08  |
| ENSG00000198643 | FAM3D   | -2.221577496 | 9E-10  |
| ENSG00000185112 | FAM43A  | 1.732376697  | 4E-09  |
| ENSG00000183114 | FAM43B  | 1.75704904   | 0.0008 |
| ENSG00000189157 | FAM47E  | -2.726102704 | 4E-07  |
| ENSG00000167695 | FAM57A  | 1.132636315  | 9E-06  |
| ENSG00000165716 | FAM69B  | -1.538926402 | 5E-11  |
| ENSG00000196550 | FAM72A  | 1.273032226  | 0.037  |
| ENSG00000188610 | FAM72B  | 1.355558249  | 0.0032 |
| ENSG00000215784 | FAM72D  | 1.530169679  | 0.0234 |
| ENSG00000157470 | FAM81A  | -1.387405282 | 5E-07  |
| ENSG00000147689 | FAM83A  | 3.226899018  | 2E-18  |
| ENSG00000168143 | FAM83B  | 1.680648328  | 2E-21  |
| ENSG00000125998 | FAM83C  | 2.237499385  | 1E-13  |
| ENSG00000101447 | FAM83D  | 2.647714422  | 1E-10  |
| ENSG00000105523 | FAM83E  | -2.477178047 | 2E-14  |
| ENSG00000188522 | FAM83G  | 1.945941287  | 6E-13  |
| ENSG00000180921 | FAM83H  | 1.597102785  | 4E-08  |
| ENSG00000162981 | FAM84A  | 1.093525102  | 7E-07  |
| ENSG00000158483 | FAM86C1 | 1.243235947  | 2E-05  |
| ENSG00000182118 | FAM89A  | 1.127381142  | 3E-07  |
| ENSG00000064763 | FAR2    | -1.026843866 | 0.0365 |
| ENSG00000152767 | FARP1   | -1.514972808 | 5E-10  |
| ENSG00000169710 | FASN    | -1.135313124 | 0.0009 |
| ENSG00000165323 | FAT3    | -1.012391021 | 0.0101 |
| ENSG00000196159 | FAT4    | -1.421458081 | 6E-06  |
| ENSG00000170271 | FAXDC2  | -2.044725118 | 1E-15  |
| ENSG00000162458 | FBLIM1  | 1.451289339  | 2E-08  |
| ENSG00000077942 | FBLN1   | -2.11701526  | 2E-15  |
| ENSG00000163520 | FBLN2   | -2.546567284 | 2E-16  |
| ENSG00000140092 | FBLN5   | -2.758655327 | 1E-19  |
| ENSG00000166147 | FBN1    | -1.745100653 | 5E-06  |
| ENSG00000138829 | FBN2    | 1.190916043  | 0.0206 |
| ENSG00000165140 | FBP1    | -1.938259199 | 3E-09  |
| ENSG00000197361 | FBXL22  | -1.058689919 | 2E-05  |

|                 |        |              |        |
|-----------------|--------|--------------|--------|
| ENSG00000183580 | FBXL7  | -1.496313038 | 6E-07  |
| ENSG00000147912 | FBXO10 | 1.280872189  | 8E-09  |
| ENSG00000156804 | FBXO32 | -1.946149278 | 3E-15  |
| ENSG00000174013 | FBXO45 | 2.422961044  | 5E-25  |
| ENSG00000112029 | FBXO5  | 1.319291681  | 5E-09  |
| ENSG00000171931 | FBXW10 | 2.083221151  | 0.0184 |
| ENSG00000104921 | FCER2  | -3.212764984 | 0.0002 |
| ENSG00000162747 | FCGR3B | 2.682681241  | 7E-07  |
| ENSG00000104870 | FCGRT  | -1.300330861 | 1E-25  |
| ENSG00000130475 | FCHO1  | 1.110774119  | 0.0006 |
| ENSG00000197948 | FCHSD1 | 1.278215589  | 5E-12  |
| ENSG00000160339 | FCN2   | -4.931840736 | 1E-06  |
| ENSG00000132185 | FCRLA  | 2.407562997  | 2E-06  |
| ENSG00000162746 | FCRLB  | 2.126451565  | 8E-05  |
| ENSG00000101311 | FERMT1 | 1.211855464  | 1E-14  |
| ENSG00000073712 | FERMT2 | -2.036697076 | 5E-16  |
| ENSG00000090512 | FETUB  | 3.169040494  | 3E-09  |
| ENSG00000126262 | FFAR2  | 1.254167161  | 0.006  |
| ENSG00000186188 | FFAR4  | -2.213287601 | 1E-19  |
| ENSG00000146192 | FGD2   | 1.42047214   | 1E-06  |
| ENSG00000154783 | FGD5   | -1.505733445 | 3E-08  |
| ENSG00000113578 | FGF1   | -2.304835788 | 2E-09  |
| ENSG00000070193 | FGF10  | -1.917078168 | 0.0013 |
| ENSG00000129682 | FGF13  | -2.666205255 | 3E-23  |
| ENSG00000102466 | FGF14  | -2.103293424 | 0.0003 |
| ENSG00000196468 | FGF16  | -3.245094605 | 0.0027 |
| ENSG00000158815 | FGF17  | -1.772190146 | 0.0434 |
| ENSG00000156427 | FGF18  | -1.303218383 | 0.0043 |
| ENSG00000138685 | FGF2   | -2.559601775 | 2E-16  |
| ENSG00000140285 | FGF7   | -1.820469799 | 2E-08  |
| ENSG00000102678 | FGF9   | -3.101507468 | 4E-05  |
| ENSG00000137440 | FGFBP1 | 3.472904435  | 2E-16  |
| ENSG00000137441 | FGFBP2 | -3.690695859 | 2E-19  |
| ENSG00000077782 | FGFR1  | -1.763205225 | 2E-11  |
| ENSG00000127418 | FGFRL1 | -1.828414878 | 2E-15  |
| ENSG00000127951 | FGL2   | -1.322093126 | 2E-05  |
| ENSG00000137460 | FHDC1  | 1.642364565  | 1E-16  |
| ENSG00000022267 | FHL1   | -3.33225818  | 4E-32  |
| ENSG00000112214 | FHL5   | -2.067324324 | 2E-06  |
| ENSG00000134775 | FHOD3  | -1.386268056 | 3E-05  |
| ENSG00000176971 | FIBIN  | -1.92827098  | 7E-09  |
| ENSG00000118407 | FILIP1 | -1.919783902 | 4E-11  |
| ENSG00000179431 | FJX1   | 1.027829737  | 0.0004 |
| ENSG00000204315 | FKBPL  | 1.76249829   | 5E-12  |
| ENSG00000143631 | FLG    | 1.450249123  | 0.0009 |
| ENSG00000143520 | FLG2   | 1.734118288  | 1E-05  |
| ENSG00000151702 | FLI1   | -1.091295138 | 2E-05  |
| ENSG00000128591 | FLNC   | -1.430916056 | 4E-07  |

|                 |             |              |        |
|-----------------|-------------|--------------|--------|
| ENSG00000126500 | FLRT1       | -3.072992986 | 0.0012 |
| ENSG00000125848 | FLRT3       | 2.19842429   | 3E-08  |
| ENSG00000090554 | FLT3LG      | -1.753602274 | 0.0012 |
| ENSG00000131781 | FMO5        | -1.9565697   | 2E-13  |
| ENSG00000122176 | FMOD        | -2.36243792  | 3E-17  |
| ENSG00000115414 | FN1         | -1.091107474 | 0.0018 |
| ENSG00000167363 | FN3K        | -1.931526392 | 2E-21  |
| ENSG00000137942 | FNBP1L      | -1.269292223 | 1E-08  |
| ENSG00000228594 | FNDC10      | 1.726132628  | 3E-08  |
| ENSG00000115226 | FNDC4       | -1.182867426 | 1E-05  |
| ENSG00000160097 | FNDC5       | -2.485600063 | 3E-07  |
| ENSG00000110195 | FOLR1       | -3.363603098 | 2E-14  |
| ENSG00000165457 | FOLR2       | -2.202300695 | 8E-07  |
| ENSG00000175592 | FOSL1       | 4.11740214   | 2E-13  |
| ENSG00000129514 | FOXA1       | -3.58478216  | 9E-11  |
| ENSG00000054598 | FOXC1       | -1.624855674 | 6E-16  |
| ENSG00000186564 | FOXD2       | -2.026075126 | 0.0017 |
| ENSG00000178919 | FOXE1       | 2.274175248  | 3E-05  |
| ENSG00000168269 | FOXI1       | -3.245936943 | 2E-17  |
| ENSG00000186766 | FOXI2       | -2.607260026 | 1E-05  |
| ENSG00000214336 | FOXI3       | -1.82135522  | 0.0275 |
| ENSG00000111206 | FOXM1       | 1.661353275  | 5E-07  |
| ENSG00000109101 | FOXN1       | 1.422624822  | 6E-07  |
| ENSG00000204060 | FOXO6       | -1.185679294 | 0.0058 |
| ENSG00000049768 | FOXP3       | 1.619343465  | 0.002  |
| ENSG00000179772 | FOXS1       | -1.251158626 | 3E-06  |
| ENSG00000259030 | FPGT-TNNI3K | -2.35262941  | 2E-08  |
| ENSG00000171051 | FPR1        | 1.934356373  | 0.0304 |
| ENSG00000171049 | FPR2        | 4.133215132  | 0.0002 |
| ENSG00000164946 | FREM1       | -2.341230206 | 7E-13  |
| ENSG00000153303 | FRMD1       | -4.32490338  | 1E-11  |
| ENSG00000165694 | FRMD7       | -3.734246865 | 2E-05  |
| ENSG00000126391 | FRMD8       | 1.2166006    | 7E-08  |
| ENSG00000070601 | FRMPD1      | 1.418206311  | 2E-07  |
| ENSG00000260230 | FRRS1L      | -2.837136043 | 4E-06  |
| ENSG00000162998 | FRZB        | -2.698365359 | 3E-24  |
| ENSG00000075618 | FSCN1       | 1.509613325  | 2E-07  |
| ENSG00000186628 | FSD2        | -3.490289628 | 0.0004 |
| ENSG00000188738 | FSIP2       | -2.440880282 | 1E-05  |
| ENSG00000134363 | FST         | -1.487434738 | 5E-06  |
| ENSG00000163430 | FSTL1       | -1.570042302 | 4E-07  |
| ENSG00000167996 | FTH1        | -1.014273308 | 3E-09  |
| ENSG00000087086 | FTL         | -1.31279495  | 1E-15  |
| ENSG00000179163 | FUCA1       | -1.047980328 | 3E-13  |
| ENSG00000174951 | FUT1        | 1.532731872  | 2E-09  |
| ENSG00000176920 | FUT2        | 1.500051027  | 4E-13  |
| ENSG00000171124 | FUT3        | 2.810448164  | 2E-13  |
| ENSG00000172461 | FUT9        | -4.005513038 | 8E-14  |

|                 |           |              |        |
|-----------------|-----------|--------------|--------|
| ENSG00000266964 | FXD1      | -2.987063849 | 2E-05  |
| ENSG00000137726 | FXD6      | -1.748324644 | 7E-12  |
| ENSG00000010810 | FYN       | -1.189573815 | 2E-09  |
| ENSG00000157240 | FZD1      | -1.760742885 | 9E-22  |
| ENSG00000174804 | FZD4      | -2.990550788 | 6E-25  |
| ENSG00000155760 | FZD7      | -1.745069008 | 1E-16  |
| ENSG00000177283 | FZD8      | -1.453782509 | 9E-12  |
| ENSG00000123689 | GOS2      | -3.860374813 | 1E-07  |
| ENSG00000131482 | G6PC      | 3.149776927  | 0.0254 |
| ENSG00000160219 | GAB3      | -1.051689415 | 0.0001 |
| ENSG00000139112 | GABARAPL1 | -1.906646145 | 9E-25  |
| ENSG00000151834 | GABRA2    | -3.219151101 | 1E-07  |
| ENSG00000145864 | GABRB2    | -2.700558547 | 4E-07  |
| ENSG00000182256 | GABRG3    | -1.857740813 | 2E-06  |
| ENSG00000094755 | GABRP     | -2.712597026 | 6E-19  |
| ENSG00000268089 | GABRQ     | 1.766818812  | 0.0001 |
| ENSG00000128242 | GAL3ST1   | -3.633382764 | 7E-05  |
| ENSG00000143891 | GALM      | -1.139253998 | 2E-06  |
| ENSG00000119514 | GALNT12   | -1.57249422  | 4E-14  |
| ENSG00000144278 | GALNT13   | -2.275856566 | 6E-09  |
| ENSG00000158089 | GALNT14   | 1.684602086  | 3E-05  |
| ENSG00000131386 | GALNT15   | -3.431670416 | 2E-25  |
| ENSG00000100626 | GALNT16   | -2.59714179  | 1E-13  |
| ENSG00000185274 | GALNT17   | -2.526456877 | 2E-12  |
| ENSG00000139629 | GALNT6    | 2.894135942  | 2E-35  |
| ENSG00000130035 | GALNT8    | -2.440821156 | 1E-06  |
| ENSG00000172020 | GAP43     | -1.265649652 | 0.0332 |
| ENSG00000157833 | GAREM2    | -1.10140168  | 0.0021 |
| ENSG00000106105 | GARS      | 1.646599025  | 2E-22  |
| ENSG00000148935 | GAS2      | -1.16735472  | 0.0425 |
| ENSG00000184502 | GAST      | 3.730218538  | 0.0118 |
| ENSG00000141448 | GATA6     | -1.598328231 | 0.0002 |
| ENSG00000059691 | GATB      | 1.189719588  | 8E-07  |
| ENSG00000162654 | GBP4      | -1.649246736 | 8E-09  |
| ENSG00000183347 | GBP6      | 3.031691422  | 1E-19  |
| ENSG00000215644 | GCGR      | -1.928189625 | 0.0027 |
| ENSG00000131979 | GCH1      | 1.457286459  | 5E-08  |
| ENSG00000137880 | GCHFR     | -1.788327892 | 1E-21  |
| ENSG00000187210 | GCNT1     | -1.229003102 | 2E-05  |
| ENSG00000111846 | GCNT2     | -1.705203808 | 4E-10  |
| ENSG00000176928 | GCNT4     | 2.574582669  | 2E-19  |
| ENSG00000137878 | GCOM1     | 1.654440584  | 0.0005 |
| ENSG00000169224 | GCSAML    | -1.642746202 | 0.0294 |
| ENSG00000119125 | GDA       | 1.699601551  | 0.0014 |
| ENSG00000266524 | GDF10     | -3.354808495 | 4E-11  |
| ENSG00000125965 | GDF5      | -3.085472906 | 1E-07  |
| ENSG00000168621 | GDNF      | 2.312051619  | 3E-09  |
| ENSG00000102886 | GDPD3     | 2.303219389  | 3E-15  |



|                 |          |              |        |
|-----------------|----------|--------------|--------|
| ENSG00000158555 | GDPD5    | -2.130293733 | 1E-26  |
| ENSG00000131095 | GFAP     | -2.246304536 | 2E-09  |
| ENSG00000141098 | GFOD2    | 1.383869218  | 3E-16  |
| ENSG00000131459 | GFPT2    | -1.304965966 | 7E-08  |
| ENSG00000151892 | GFRA1    | -3.1179828   | 7E-16  |
| ENSG00000168546 | GFRA2    | -2.024011635 | 8E-08  |
| ENSG00000146013 | GFRA3    | -1.335870635 | 0.032  |
| ENSG00000006625 | GGCT     | 1.929448058  | 8E-22  |
| ENSG00000137563 | GGH      | 2.782756614  | 4E-36  |
| ENSG00000099998 | GGT5     | -1.588206748 | 2E-11  |
| ENSG00000112964 | GHR      | -2.504399355 | 2E-17  |
| ENSG00000157017 | GHRL     | -1.937361921 | 2E-05  |
| ENSG00000101193 | GID8     | 1.027246053  | 4E-06  |
| ENSG00000213203 | GIMAP1   | -1.642144918 | 4E-08  |
| ENSG00000133574 | GIMAP4   | -1.314297412 | 3E-07  |
| ENSG00000196329 | GIMAP5   | -1.084488385 | 0.0252 |
| ENSG00000133561 | GIMAP6   | -1.49407595  | 3E-10  |
| ENSG00000179144 | GIMAP7   | -1.404130448 | 2E-08  |
| ENSG00000171115 | GIMAP8   | -1.60511668  | 2E-09  |
| ENSG00000101003 | GINS1    | 1.509767076  | 5E-10  |
| ENSG00000131153 | GINS2    | 1.524247936  | 2E-07  |
| ENSG00000181938 | GINS3    | 1.303996559  | 6E-15  |
| ENSG00000123159 | GIPC1    | 1.23577958   | 4E-07  |
| ENSG00000152661 | GJA1     | 1.862339526  | 8E-22  |
| ENSG00000121743 | GJA3     | 2.091098327  | 0.0005 |
| ENSG00000165474 | GJB2     | 3.612210455  | 8E-13  |
| ENSG00000188910 | GJB3     | 1.805862836  | 9E-06  |
| ENSG00000189280 | GJB5     | 1.578222704  | 5E-06  |
| ENSG00000121742 | GJB6     | 2.453652762  | 6E-10  |
| ENSG00000198835 | GJC2     | -1.803324161 | 5E-07  |
| ENSG00000198814 | GK       | 1.366773036  | 0.0002 |
| ENSG00000165113 | GKAP1    | -1.806090039 | 2E-06  |
| ENSG00000166105 | GLB1L3   | 1.240141904  | 2E-07  |
| ENSG00000111087 | GLI1     | -1.532596087 | 3E-10  |
| ENSG00000074047 | GLI2     | -1.295549263 | 7E-05  |
| ENSG00000180481 | GLIPR1L2 | -1.885519512 | 2E-08  |
| ENSG00000122694 | GLIPR2   | -1.131101372 | 2E-06  |
| ENSG00000126603 | GLIS2    | -1.461124436 | 2E-08  |
| ENSG00000124767 | GLO1     | 1.206362814  | 6E-07  |
| ENSG00000112164 | GLP1R    | -1.690730981 | 0.0063 |
| ENSG00000065325 | GLP2R    | -4.031555738 | 2E-05  |
| ENSG00000109738 | GLRB     | -3.138185507 | 6E-13  |
| ENSG00000108010 | GLRX3    | 1.460434327  | 1E-09  |
| ENSG00000139433 | GLTP     | 2.524766472  | 1E-27  |
| ENSG00000182327 | GLTPD2   | 3.836532617  | 0.0038 |
| ENSG00000149124 | GLYAT    | -3.570020705 | 1E-22  |
| ENSG00000156689 | GLYATL2  | -1.473507693 | 0.0007 |
| ENSG00000196743 | GM2A     | 1.237771321  | 7E-12  |

|                 |         |              |        |
|-----------------|---------|--------------|--------|
| ENSG00000060558 | GNA15   | 2.425772758  | 8E-15  |
| ENSG00000065135 | GNAI3   | 1.280025953  | 4E-10  |
| ENSG00000128266 | GNAZ    | -2.059029266 | 2E-13  |
| ENSG00000111664 | GNB3    | -1.213925921 | 0.0069 |
| ENSG00000159921 | GNE     | -1.283823986 | 5E-16  |
| ENSG00000186469 | GNG2    | -1.645759575 | 9E-13  |
| ENSG00000168243 | GNG4    | 3.088134215  | 5E-06  |
| ENSG00000176533 | GNG7    | -2.30729496  | 2E-14  |
| ENSG00000124713 | GNMT    | -1.978975953 | 0.0285 |
| ENSG00000155265 | GOLGA7B | 1.506748871  | 1E-06  |
| ENSG00000188626 | GOLGA8M | -1.97976033  | 0.0391 |
| ENSG00000232653 | GOLGA8N | -1.303299019 | 0.0003 |
| ENSG00000135052 | GOLM1   | -1.119812614 | 9E-06  |
| ENSG00000174567 | GOLT1A  | -1.789063635 | 0.0047 |
| ENSG00000119927 | GPAM    | -3.053201284 | 9E-18  |
| ENSG00000179921 | GPBAR1  | -2.326841383 | 1E-09  |
| ENSG00000213420 | GPC2    | -1.347070249 | 0.0011 |
| ENSG00000147257 | GPC3    | -3.462936257 | 2E-09  |
| ENSG00000076716 | GPC4    | -2.084326864 | 2E-17  |
| ENSG00000183098 | GPC6    | -2.297557415 | 1E-12  |
| ENSG00000167588 | GPD1    | -4.483178273 | 2E-18  |
| ENSG00000152642 | GPD1L   | -1.170311605 | 9E-11  |
| ENSG00000164850 | GPER1   | -1.966810999 | 6E-12  |
| ENSG00000277494 | GPIHBP1 | -3.268951544 | 3E-13  |
| ENSG00000183671 | GPR1    | 2.173513473  | 3E-11  |
| ENSG00000132975 | GPR12   | -3.654516663 | 2E-20  |
| ENSG00000164849 | GPR146  | -2.020229949 | 2E-18  |
| ENSG00000158292 | GPR153  | 1.177158392  | 8E-18  |
| ENSG00000180758 | GPR157  | 1.025624929  | 5E-08  |
| ENSG00000173890 | GPR160  | -1.776222413 | 9E-08  |
| ENSG00000184194 | GPR173  | -1.136695165 | 0.0054 |
| ENSG00000125245 | GPR18   | 2.217748691  | 0.0453 |
| ENSG00000204882 | GPR20   | -1.744245472 | 0.015  |
| ENSG00000170837 | GPR27   | -1.340636228 | 0.0019 |
| ENSG00000181773 | GPR3    | 1.421769915  | 0.0192 |
| ENSG00000171659 | GPR34   | -2.445391718 | 3E-07  |
| ENSG00000178623 | GPR35   | -1.657431412 | 4E-05  |
| ENSG00000119714 | GPR68   | 2.016392809  | 7E-11  |
| ENSG00000155269 | GPR78   | 2.408765478  | 0.0147 |
| ENSG00000138271 | GPR87   | 1.816930285  | 6E-16  |
| ENSG00000198932 | GPRASP1 | -2.357107595 | 1E-13  |
| ENSG00000158301 | GPRASP2 | -1.145096803 | 9E-12  |
| ENSG00000167191 | GPRC5B  | -2.069640923 | 7E-16  |
| ENSG00000170412 | GPRC5C  | -1.277434716 | 4E-12  |
| ENSG00000169258 | GPRIN1  | 3.44604635   | 2E-21  |
| ENSG00000204175 | GPRIN2  | 1.53144846   | 9E-05  |
| ENSG00000167701 | GPT     | -1.036834155 | 0.0059 |
| ENSG00000176153 | GPX2    | 1.854565595  | 2E-08  |

|                 |           |              |        |
|-----------------|-----------|--------------|--------|
| ENSG00000100351 | GRAP2     | -1.472232725 | 0.0002 |
| ENSG00000115290 | GRB14     | -2.159015382 | 1E-13  |
| ENSG00000141449 | GREB1L    | -2.980362198 | 9E-17  |
| ENSG00000166923 | GREM1     | 1.141296533  | 0.0181 |
| ENSG00000180875 | GREM2     | -2.317740055 | 0.0001 |
| ENSG00000134317 | GRHL1     | 1.287528231  | 2E-11  |
| ENSG00000158055 | GRHL3     | 2.964472702  | 1E-19  |
| ENSG00000155511 | GRIA1     | -2.183780727 | 4E-06  |
| ENSG00000120251 | GRIA2     | -2.550611971 | 2E-09  |
| ENSG00000152578 | GRIA4     | -3.190036249 | 7E-13  |
| ENSG00000171189 | GRIK1     | -1.880417653 | 0.0001 |
| ENSG00000163873 | GRIK3     | -2.174640355 | 2E-05  |
| ENSG00000105737 | GRIK5     | -1.460554671 | 0.0045 |
| ENSG00000183454 | GRIN2A    | -1.20379245  | 0.0027 |
| ENSG00000273079 | GRIN2B    | -2.811524632 | 5E-09  |
| ENSG00000161509 | GRIN2C    | -1.916727627 | 0.0139 |
| ENSG00000198785 | GRIN3A    | -2.808128733 | 0.0005 |
| ENSG00000100077 | GRK3      | -1.348364432 | 3E-09  |
| ENSG00000124493 | GRM4      | 3.645028903  | 5E-06  |
| ENSG00000196277 | GRM7      | -3.125215177 | 0.0065 |
| ENSG00000164284 | GRPEL2    | 1.179216811  | 0.0001 |
| ENSG00000133937 | GSC       | -1.87165211  | 0.0126 |
| ENSG00000167914 | GSDMA     | 3.019684775  | 2E-16  |
| ENSG00000073605 | GSDMB     | -1.330375228 | 0.0002 |
| ENSG00000147697 | GSDMC     | 1.480578316  | 1E-15  |
| ENSG00000105928 | GSDME     | 1.353718599  | 2E-05  |
| ENSG00000100744 | GSKIP     | 1.284392296  | 3E-06  |
| ENSG00000148180 | GSN       | -1.832865907 | 3E-24  |
| ENSG00000243955 | GSTA1     | -2.147582209 | 8E-05  |
| ENSG00000170899 | GSTA4     | 1.300750169  | 7E-15  |
| ENSG00000213366 | GSTM2     | -1.480243858 | 7E-06  |
| ENSG00000134201 | GSTM5     | -2.834068824 | 8E-19  |
| ENSG00000084207 | GSTP1     | 1.857694015  | 3E-11  |
| ENSG00000196275 | GTF2IRD2  | -1.020488293 | 0.0012 |
| ENSG00000174428 | GTF2IRD2B | -1.321321169 | 9E-07  |
| ENSG00000155115 | GTF3C6    | 1.295804715  | 3E-10  |
| ENSG00000112599 | GUCA1B    | -1.265021839 | 0.0003 |
| ENSG00000164116 | GUCY1A1   | -1.325516266 | 2E-06  |
| ENSG00000179240 | GVQW3     | -1.995476168 | 8E-07  |
| ENSG00000172986 | GXYLT2    | -1.208114765 | 0.0032 |
| ENSG00000056998 | GYG2      | -3.543337016 | 1E-25  |
| ENSG00000136732 | GYPC      | -2.018798285 | 1E-19  |
| ENSG00000111713 | GYS2      | -5.299327699 | 7E-12  |
| ENSG00000188486 | H2AFX     | 1.218844701  | 0.0014 |
| ENSG00000113648 | H2AFY     | 1.164127806  | 8E-17  |
| ENSG00000164032 | H2AFZ     | 1.218762674  | 4E-08  |
| ENSG00000162882 | HAO       | -1.21058983  | 0.0004 |
| ENSG00000148702 | HABP2     | 4.997447513  | 5E-07  |

|                 |           |              |        |
|-----------------|-----------|--------------|--------|
| ENSG00000130956 | HABP4     | -1.187064944 | 6E-11  |
| ENSG00000084110 | HAL       | 3.781416551  | 4E-36  |
| ENSG00000164107 | HAND2     | -3.051212999 | 4E-06  |
| ENSG00000116882 | HAO2      | -3.666182199 | 0.0007 |
| ENSG00000132702 | HAPLN2    | -3.723313147 | 0.0005 |
| ENSG00000105509 | HAS1      | -1.914511988 | 0.0313 |
| ENSG00000103044 | HAS3      | 2.430912737  | 6E-13  |
| ENSG00000177602 | HASPIN    | 1.75721338   | 0.0001 |
| ENSG00000135077 | HAVCR2    | -1.470190267 | 3E-07  |
| ENSG00000206172 | HBA1      | -2.644320223 | 0.0006 |
| ENSG00000188536 | HBA2      | -2.232463325 | 0.005  |
| ENSG00000113070 | HBEGF     | 1.451945397  | 0.0001 |
| ENSG00000196917 | HCAR1     | -2.884666309 | 1E-05  |
| ENSG00000182782 | HCAR2     | 1.287937256  | 0.0026 |
| ENSG00000255398 | HCAR3     | 2.122391805  | 0.0048 |
| ENSG00000165259 | HDX       | -1.194784593 | 0.0005 |
| ENSG00000187105 | HEATR4    | -1.974178561 | 0.0021 |
| ENSG00000130589 | HELZ2     | 1.047270564  | 8E-05  |
| ENSG00000136929 | HEMGN     | -3.372829035 | 6E-06  |
| ENSG00000165478 | HEPACAM   | -4.149573516 | 1E-08  |
| ENSG00000181333 | HEPHL1    | 5.044690047  | 8E-09  |
| ENSG00000138642 | HERC6     | 1.149588917  | 3E-05  |
| ENSG00000069812 | HES2      | 1.138604672  | 1E-11  |
| ENSG00000197921 | HES5      | 1.731220565  | 0.002  |
| ENSG00000179111 | HES7      | -2.040821542 | 0.0043 |
| ENSG00000162669 | HFM1      | -2.642130919 | 0.0307 |
| ENSG00000113924 | HGD       | -1.750315732 | 0.018  |
| ENSG00000019991 | HGF       | -1.164845602 | 0.0006 |
| ENSG00000010282 | HHATL     | -2.564329815 | 0.0357 |
| ENSG00000164161 | HHIP      | -2.726069889 | 8E-06  |
| ENSG00000182218 | HHIPL1    | -1.148255627 | 0.025  |
| ENSG00000106049 | HIBADH    | -1.258967292 | 2E-13  |
| ENSG00000177374 | HIC1      | -1.699160886 | 2E-10  |
| ENSG00000167861 | HID1      | -1.970390311 | 1E-17  |
| ENSG00000124440 | HIF3A     | -3.217751376 | 4E-19  |
| ENSG00000181061 | HIGD1A    | 1.472705085  | 5E-11  |
| ENSG00000180573 | HIST1H2AC | 1.292812495  | 8E-05  |
| ENSG00000196747 | HIST1H2AI | 2.292545441  | 0.01   |
| ENSG00000276368 | HIST1H2AJ | 1.760476912  | 0.0224 |
| ENSG00000180596 | HIST1H2BC | 1.010745282  | 0.0062 |
| ENSG00000158373 | HIST1H2BD | 1.405080676  | 1E-05  |
| ENSG00000277224 | HIST1H2BF | 1.797076462  | 0.0018 |
| ENSG00000273802 | HIST1H2BG | 1.493962083  | 0.0027 |
| ENSG00000275713 | HIST1H2BH | 2.302445778  | 1E-06  |
| ENSG00000278588 | HIST1H2BI | 2.114456913  | 0.009  |
| ENSG00000124635 | HIST1H2BJ | 1.507661876  | 0.0028 |
| ENSG00000197903 | HIST1H2BK | 1.10421082   | 2E-05  |
| ENSG00000274267 | HIST1H3B  | 1.554873951  | 0.0428 |

|                 |           |              |        |
|-----------------|-----------|--------------|--------|
| ENSG00000274750 | HIST1H3E  | 1.326310948  | 0.0041 |
| ENSG00000277775 | HIST1H3F  | 2.688464756  | 0.0291 |
| ENSG00000273983 | HIST1H3G  | 2.395190093  | 0.0165 |
| ENSG00000278828 | HIST1H3H  | 1.632732198  | 0.0013 |
| ENSG00000275379 | HIST1H3I  | 3.359139759  | 0.0292 |
| ENSG00000184260 | HIST2H2AC | 1.438363626  | 0.0155 |
| ENSG00000203814 | HIST2H2BF | 1.015500694  | 0.0073 |
| ENSG00000196890 | HIST3H2BB | 2.684695278  | 0.0002 |
| ENSG00000159399 | HK2       | 1.244654802  | 0.0006 |
| ENSG00000160883 | HK3       | -1.731816465 | 0.0008 |
| ENSG00000204257 | HLA-DMA   | -1.041152962 | 2E-07  |
| ENSG00000204252 | HLA-DOA   | -1.064404418 | 0.0004 |
| ENSG00000256269 | HMBS      | 1.041590008  | 1E-07  |
| ENSG00000148357 | HMCN2     | -2.416367103 | 3E-10  |
| ENSG00000137309 | HMGA1     | 1.139122192  | 2E-06  |
| ENSG00000149948 | HMGA2     | 5.34286545   | 1E-23  |
| ENSG00000029993 | HMGB3     | 1.260616083  | 2E-07  |
| ENSG00000146151 | HMGCLL1   | -2.755819063 | 0.0001 |
| ENSG00000113161 | HMGCR     | 1.605343142  | 9E-10  |
| ENSG00000134240 | HMGCS2    | -4.458682357 | 2E-14  |
| ENSG00000100292 | HMOX1     | 2.063470588  | 4E-16  |
| ENSG00000103415 | HMOX2     | 1.297327254  | 1E-05  |
| ENSG00000221887 | HMSD      | 1.506665515  | 0.0195 |
| ENSG00000150540 | HNMT      | -1.631777795 | 4E-16  |
| ENSG00000197451 | HNRNPAB   | 1.099043847  | 4E-08  |
| ENSG00000152413 | HOMER1    | 1.645461012  | 2E-13  |
| ENSG00000051128 | HOMER3    | 1.138255251  | 3E-09  |
| ENSG00000134709 | HOOK1     | 1.480222332  | 7E-26  |
| ENSG00000171476 | HOPX      | 1.409209469  | 6E-07  |
| ENSG00000253293 | HOXA10    | -1.754065065 | 5E-15  |
| ENSG00000005073 | HOXA11    | -1.391479328 | 0.0289 |
| ENSG00000120093 | HOXB3     | -1.144522899 | 2E-05  |
| ENSG00000120075 | HOXB5     | -1.27007961  | 0.0019 |
| ENSG00000108511 | HOXB6     | -1.568513148 | 0.0003 |
| ENSG00000123407 | HOXC12    | -1.715499469 | 3E-09  |
| ENSG00000128710 | HOXD10    | 1.196815779  | 0.0103 |
| ENSG00000257017 | HP        | -1.35462891  | 0.0186 |
| ENSG00000158104 | HPD       | -3.415743298 | 5E-06  |
| ENSG00000186603 | HPDL      | 1.856909077  | 9E-05  |
| ENSG00000164120 | HPGD      | 1.738686439  | 3E-11  |
| ENSG00000163106 | HPGDS     | -1.514688215 | 9E-06  |
| ENSG00000173083 | HPSE      | 3.018481363  | 4E-21  |
| ENSG00000172987 | HPSE2     | -2.874617484 | 2E-15  |
| ENSG00000110169 | HPX       | -1.133027312 | 0.0077 |
| ENSG00000127252 | HRASLS    | 1.270672759  | 8E-06  |
| ENSG00000168004 | HRASLS5   | -4.593733135 | 7E-13  |
| ENSG00000130528 | HRC       | -2.196854039 | 6E-08  |
| ENSG00000196196 | HRCT1     | -3.166379155 | 7E-15  |

|                 |          |              |        |
|-----------------|----------|--------------|--------|
| ENSG00000101180 | HRH3     | 5.585845566  | 4E-12  |
| ENSG00000135116 | HRK      | -1.503837887 | 0.0139 |
| ENSG00000197915 | HRNR     | 12.98184205  | 5E-56  |
| ENSG00000153976 | HS3ST3A1 | 3.703978772  | 6E-13  |
| ENSG00000182601 | HS3ST4   | -2.547137816 | 4E-06  |
| ENSG00000162040 | HS3ST6   | 1.306660107  | 0.0028 |
| ENSG00000185352 | HS6ST3   | -2.517268856 | 0.0003 |
| ENSG00000117594 | HSD11B1  | -1.83444749  | 5E-06  |
| ENSG00000176387 | HSD11B2  | -1.69813353  | 7E-11  |
| ENSG00000108786 | HSD17B1  | 2.055020477  | 2E-06  |
| ENSG00000198189 | HSD17B11 | -1.100068227 | 1E-07  |
| ENSG00000170509 | HSD17B13 | -4.039138064 | 6E-16  |
| ENSG00000087076 | HSD17B14 | -1.128607976 | 5E-05  |
| ENSG00000086696 | HSD17B2  | 1.250985164  | 0.012  |
| ENSG00000102878 | HSF4     | -1.072096917 | 0.0041 |
| ENSG00000132622 | HSPA12B  | -1.544802281 | 4E-08  |
| ENSG00000173110 | HSPA6    | 2.991274101  | 1E-09  |
| ENSG00000106211 | HSPB1    | 1.265217141  | 1E-06  |
| ENSG00000004776 | HSPB6    | -3.777346997 | 1E-29  |
| ENSG00000173641 | HSPB7    | -3.876228316 | 2E-25  |
| ENSG00000142798 | HSPG2    | -1.199026217 | 6E-07  |
| ENSG00000120694 | HSPH1    | 1.248996227  | 6E-10  |
| ENSG00000109854 | HTATIP2  | 1.434245712  | 4E-10  |
| ENSG00000135914 | HTR2B    | -1.79993299  | 0.0203 |
| ENSG00000166736 | HTR3A    | 6.240089841  | 3E-07  |
| ENSG00000164270 | HTR4     | -3.23502646  | 0.0028 |
| ENSG00000148680 | HTR7     | 3.124792594  | 5E-13  |
| ENSG00000170801 | HTRA3    | -1.293832932 | 1E-05  |
| ENSG00000122986 | HVCN1    | -1.335173809 | 1E-05  |
| ENSG00000186792 | HYAL3    | 1.526545827  | 6E-05  |
| ENSG00000157423 | HYDIN    | -2.475035139 | 0.0027 |
| ENSG00000178922 | HYI      | -1.31529518  | 1E-11  |
| ENSG00000242028 | HYPK     | -1.723460113 | 3E-05  |
| ENSG00000003147 | ICA1     | -1.734431502 | 7E-12  |
| ENSG00000163596 | ICA1L    | -1.219818603 | 2E-07  |
| ENSG00000108622 | ICAM2    | -1.016446945 | 5E-07  |
| ENSG00000105376 | ICAM5    | 1.61726093   | 0.0282 |
| ENSG00000172201 | ID4      | -1.741897904 | 5E-20  |
| ENSG00000119912 | IDE      | 2.208725814  | 3E-24  |
| ENSG00000127415 | IDUA     | -1.260639499 | 1E-06  |
| ENSG00000160888 | IER2     | 1.123984688  | 7E-05  |
| ENSG00000162783 | IER5     | 1.221703765  | 3E-08  |
| ENSG00000010295 | IFFO1    | -1.083192846 | 5E-06  |
| ENSG00000169991 | IFFO2    | 1.204907054  | 9E-06  |
| ENSG00000165949 | IFI27    | 2.730975753  | 2E-34  |
| ENSG00000119632 | IFI27L2  | 1.04032718   | 1E-09  |
| ENSG00000137965 | IFI44    | 1.503791594  | 5E-14  |
| ENSG00000126709 | IFI6     | 1.90993524   | 6E-14  |

|                 |          |              |        |
|-----------------|----------|--------------|--------|
| ENSG00000184995 | IFNE     | 5.157974157  | 2E-12  |
| ENSG00000147896 | IFNK     | 4.309484542  | 0.001  |
| ENSG00000103742 | IGDCC4   | -1.283147465 | 0.01   |
| ENSG00000017427 | IGF1     | -1.670700568 | 6E-07  |
| ENSG00000167244 | IGF2     | -2.549600334 | 1E-08  |
| ENSG00000136231 | IGF2BP3  | 1.417539884  | 0.0303 |
| ENSG00000115461 | IGFBP5   | -1.728105784 | 4E-08  |
| ENSG00000167779 | IGFBP6   | -1.130369868 | 0.0006 |
| ENSG00000188293 | IGFL1    | 10.58288269  | 1E-26  |
| ENSG00000204866 | IGFL2    | 3.157447889  | 6E-07  |
| ENSG00000188624 | IGFL3    | 2.411586015  | 3E-07  |
| ENSG00000147255 | IGSF1    | -3.405258335 | 4E-09  |
| ENSG00000152580 | IGSF10   | -2.940765874 | 3E-13  |
| ENSG00000144847 | IGSF11   | -1.237696868 | 0.0002 |
| ENSG00000117154 | IGSF21   | -2.25934288  | 3E-06  |
| ENSG00000143061 | IGSF3    | 1.261852873  | 4E-11  |
| ENSG00000183067 | IGSF5    | -2.803473047 | 0.0002 |
| ENSG00000263528 | IKBKE    | 1.153206597  | 6E-11  |
| ENSG00000137070 | IL11RA   | -1.257258817 | 0.0002 |
| ENSG00000168811 | IL12A    | -3.528771695 | 0.002  |
| ENSG00000081985 | IL12RB2  | 1.977525233  | 6E-16  |
| ENSG00000172349 | IL16     | -1.110157928 | 5E-08  |
| ENSG00000172458 | IL17D    | -2.666324127 | 2E-08  |
| ENSG00000150782 | IL18     | 1.003521156  | 1E-05  |
| ENSG00000137496 | IL18BP   | -1.040568275 | 0.0001 |
| ENSG00000115607 | IL18RAP  | 1.756695898  | 0.0087 |
| ENSG00000115008 | IL1A     | 5.448765658  | 7E-10  |
| ENSG00000125538 | IL1B     | 3.793095545  | 7E-06  |
| ENSG00000136697 | IL1F10   | 5.880414467  | 3E-09  |
| ENSG00000115590 | IL1R2    | 1.063747037  | 0.0022 |
| ENSG00000169306 | IL1RAPL1 | -2.488448175 | 0.0181 |
| ENSG00000115602 | IL1RL1   | 3.875047321  | 2E-06  |
| ENSG00000136689 | IL1RN    | 2.213252088  | 1E-10  |
| ENSG00000142677 | IL22RA1  | 1.80924102   | 2E-09  |
| ENSG00000162892 | IL24     | 5.143903864  | 0.0151 |
| ENSG00000136696 | IL36B    | 4.448320747  | 1E-09  |
| ENSG00000136688 | IL36G    | 5.150846258  | 2E-17  |
| ENSG00000136695 | IL36RN   | 4.851572033  | 4E-31  |
| ENSG00000125571 | IL37     | 1.211549832  | 0.0005 |
| ENSG00000077238 | IL4R     | 1.559139791  | 8E-11  |
| ENSG00000134352 | IL6ST    | -1.03581162  | 2E-05  |
| ENSG00000145103 | ILD1R1   | -1.713029604 | 5E-06  |
| ENSG00000141401 | IMPA2    | 1.470834912  | 4E-11  |
| ENSG00000106348 | IMPDH1   | 1.189017186  | 8E-07  |
| ENSG00000148798 | INA      | 7.582301298  | 5E-15  |
| ENSG00000163083 | INHBB    | -2.502942568 | 2E-20  |
| ENSG00000185614 | INKA1    | 1.275276844  | 6E-09  |
| ENSG00000241644 | INMT     | -2.048467574 | 4E-12  |

|                 |         |              |        |
|-----------------|---------|--------------|--------|
| ENSG00000173404 | INSM1   | -3.525435694 | 0.0082 |
| ENSG00000171105 | INSR    | -1.067274189 | 3E-06  |
| ENSG00000143493 | INTS7   | 1.007756516  | 8E-10  |
| ENSG00000127080 | IPPK    | 1.475622745  | 1E-17  |
| ENSG00000130518 | IQCN    | -2.190668003 | 1E-09  |
| ENSG00000145703 | IQGAP2  | -2.128899331 | 2E-14  |
| ENSG00000120645 | IQSEC3  | -2.609020701 | 0.0003 |
| ENSG00000134070 | IRAK2   | 1.183369897  | 0.0001 |
| ENSG00000185507 | IRF7    | 1.640900595  | 2E-12  |
| ENSG00000140968 | IRF8    | -1.253049964 | 0.0007 |
| ENSG00000170549 | IRX1    | -1.207463967 | 2E-06  |
| ENSG00000159387 | IRX6    | -2.059973799 | 2E-10  |
| ENSG00000187608 | ISG15   | 1.505346193  | 7E-13  |
| ENSG00000172183 | ISG20   | 1.242127258  | 0.0017 |
| ENSG00000129009 | ISLR    | -2.201312084 | 3E-12  |
| ENSG00000167178 | ISLR2   | -2.332629276 | 2E-09  |
| ENSG00000101230 | ISM1    | -1.99898876  | 9E-13  |
| ENSG00000105655 | ISYNA1  | -1.622364203 | 9E-15  |
| ENSG00000213949 | ITGA1   | -1.089817553 | 3E-05  |
| ENSG00000137809 | ITGA11  | -1.951525017 | 1E-06  |
| ENSG00000135424 | ITGA7   | -2.434926694 | 1E-14  |
| ENSG00000077943 | ITGA8   | -1.51290174  | 7E-06  |
| ENSG00000144668 | ITGA9   | -1.044819093 | 0.0012 |
| ENSG00000160255 | ITGB2   | -1.720072169 | 1E-09  |
| ENSG00000259207 | ITGB3   | -1.792509858 | 4E-05  |
| ENSG00000115221 | ITGB6   | 1.095374569  | 0.0047 |
| ENSG00000198542 | ITGBL1  | -2.233923045 | 6E-09  |
| ENSG00000162267 | ITIH3   | -1.86550961  | 4E-05  |
| ENSG00000055955 | ITIH4   | -1.696162935 | 0.001  |
| ENSG00000123243 | ITIH5   | -2.658451374 | 1E-20  |
| ENSG00000102313 | ITIH6   | -2.056273253 | 0.0048 |
| ENSG00000078596 | ITM2A   | -1.754475887 | 2E-11  |
| ENSG00000150995 | ITPR1   | -1.740467214 | 5E-22  |
| ENSG00000148841 | ITPRIP  | 1.031424219  | 2E-05  |
| ENSG00000205726 | ITSN1   | -1.213371214 | 4E-10  |
| ENSG00000128928 | IVD     | -1.231930335 | 2E-07  |
| ENSG00000163207 | IVL     | 4.818420231  | 4E-20  |
| ENSG00000009765 | IYD     | -1.469881207 | 0.036  |
| ENSG00000182264 | IZUMO1  | 1.013862913  | 0.0207 |
| ENSG00000077684 | JADE1   | -1.305669044 | 2E-15  |
| ENSG00000043143 | JADE2   | -1.298919656 | 1E-09  |
| ENSG00000188385 | JAKMIP3 | -1.61194278  | 0.0101 |
| ENSG00000154721 | JAM2    | -1.421581312 | 6E-08  |
| ENSG00000166086 | JAM3    | -1.050932332 | 1E-05  |
| ENSG00000165757 | JCAD    | -1.39975115  | 2E-06  |
| ENSG00000152409 | JMY     | 1.277891595  | 3E-16  |
| ENSG00000149596 | JPH2    | -2.343923542 | 6E-15  |
| ENSG00000189159 | JPT1    | 2.145006535  | 1E-12  |



|                 |         |              |        |
|-----------------|---------|--------------|--------|
| ENSG00000171223 | JUNB    | 1.61521958   | 1E-07  |
| ENSG00000173801 | JUP     | 2.020186213  | 1E-10  |
| ENSG00000197256 | KANK2   | -1.651284522 | 9E-16  |
| ENSG00000186994 | KANK3   | -1.305907795 | 1E-11  |
| ENSG00000132854 | KANK4   | -2.017949254 | 1E-05  |
| ENSG00000232593 | KANTR   | -1.099284772 | 0.0008 |
| ENSG00000187715 | KBTBD12 | -2.514620008 | 4E-05  |
| ENSG00000163376 | KBTBD8  | 1.840972387  | 3E-06  |
| ENSG00000111262 | KCNA1   | -2.733453782 | 5E-05  |
| ENSG00000177301 | KCNA2   | -2.516974235 | 3E-07  |
| ENSG00000182255 | KCNA4   | -3.270019029 | 0.0016 |
| ENSG00000130037 | KCNA5   | -2.946939205 | 2E-05  |
| ENSG00000104848 | KCNA7   | 1.44748377   | 0.0406 |
| ENSG00000169282 | KCNAB1  | -3.071468226 | 1E-14  |
| ENSG00000158445 | KCNB1   | -4.035355581 | 3E-23  |
| ENSG00000184408 | KCND2   | -2.488593761 | 3E-05  |
| ENSG00000175538 | KCNE3   | -1.721150249 | 9E-05  |
| ENSG00000171126 | KCNG3   | 1.369011237  | 0.0454 |
| ENSG00000143473 | KCNH1   | 3.999671288  | 1E-05  |
| ENSG00000183960 | KCNH8   | -1.072804968 | 0.0084 |
| ENSG00000182132 | KCNIP1  | -1.903121293 | 0.0119 |
| ENSG00000120049 | KCNIP2  | -3.820728139 | 5E-24  |
| ENSG00000185774 | KCNIP4  | -3.073415892 | 0.0379 |
| ENSG00000151704 | KCNJ1   | -1.63608358  | 0.0027 |
| ENSG00000157551 | KCNJ15  | 2.605928291  | 1E-18  |
| ENSG00000260458 | KCNJ18  | 2.59599538   | 1E-10  |
| ENSG00000168135 | KCNJ4   | -2.644261853 | 0.0082 |
| ENSG00000120457 | KCNJ5   | -1.47828408  | 9E-05  |
| ENSG00000121361 | KCNJ8   | -1.362433535 | 2E-06  |
| ENSG00000135750 | KCNK1   | 1.59354946   | 1E-09  |
| ENSG00000100433 | KCNK10  | 4.700701236  | 6E-19  |
| ENSG00000124249 | KCNK15  | -2.164164068 | 8E-11  |
| ENSG00000171303 | KCNK3   | -1.175022524 | 0.0091 |
| ENSG00000164626 | KCNK5   | -2.321290814 | 2E-30  |
| ENSG00000099337 | KCNK6   | 1.332970746  | 7E-12  |
| ENSG00000173338 | KCNK7   | 1.432816748  | 0.0001 |
| ENSG00000145936 | KCNMB1  | -2.058214222 | 2E-11  |
| ENSG00000104783 | KCNN4   | -2.283195205 | 2E-12  |
| ENSG00000117013 | KCNQ4   | -1.285274469 | 2E-06  |
| ENSG00000185760 | KCNQ5   | -1.148167136 | 0.0083 |
| ENSG00000162687 | KCNT2   | -1.905768259 | 0.0007 |
| ENSG00000213859 | KCTD11  | 1.745959733  | 1E-08  |
| ENSG00000178695 | KCTD12  | -1.495728057 | 5E-08  |
| ENSG00000151364 | KCTD14  | -1.116339613 | 3E-06  |
| ENSG00000183775 | KCTD16  | -3.156144468 | 0.0056 |
| ENSG00000180332 | KCTD4   | 2.442811203  | 3E-11  |
| ENSG00000167977 | KCTD5   | 1.06184172   | 5E-05  |
| ENSG00000183783 | KCTD8   | -3.920501293 | 0.0027 |

|                 |           |              |        |
|-----------------|-----------|--------------|--------|
| ENSG00000131773 | KHDRBS3   | -1.231734627 | 4E-07  |
| ENSG00000235750 | KIAA0040  | -1.111142453 | 3E-11  |
| ENSG00000135709 | KIAA0513  | 1.367115165  | 5E-09  |
| ENSG00000114656 | KIAA1257  | 1.587493453  | 2E-07  |
| ENSG00000116299 | KIAA1324  | -3.033716748 | 2E-21  |
| ENSG00000164659 | KIAA1324L | -1.151436103 | 1E-06  |
| ENSG00000122778 | KIAA1549  | -1.954711416 | 5E-12  |
| ENSG00000135835 | KIAA1614  | -1.039300066 | 2E-05  |
| ENSG00000149633 | KIAA1755  | -1.83115039  | 4E-05  |
| ENSG00000138160 | KIF11     | 1.218643888  | 2E-07  |
| ENSG00000136883 | KIF12     | -1.463309356 | 3E-07  |
| ENSG00000118193 | KIF14     | 1.099296307  | 0.0047 |
| ENSG00000121621 | KIF18A    | 2.134192041  | 3E-08  |
| ENSG00000186185 | KIF18B    | 1.432884558  | 0.0001 |
| ENSG00000112984 | KIF20A    | 1.776261747  | 1E-05  |
| ENSG00000137807 | KIF23     | 1.424272413  | 4E-09  |
| ENSG00000066735 | KIF26A    | -1.273924442 | 0.0001 |
| ENSG00000162849 | KIF26B    | -1.141050358 | 9E-08  |
| ENSG00000165115 | KIF27     | -1.099521618 | 0.0024 |
| ENSG00000142945 | KIF2C     | 1.658595109  | 5E-07  |
| ENSG00000090889 | KIF4A     | 1.533392644  | 3E-05  |
| ENSG00000168280 | KIF5C     | -1.403788946 | 9E-05  |
| ENSG00000164627 | KIF6      | -2.401212984 | 0.0001 |
| ENSG00000166813 | KIF7      | -1.137097912 | 0.0003 |
| ENSG00000237649 | KIFC1     | 1.015689772  | 0.0022 |
| ENSG00000157404 | KIT       | -1.79648627  | 3E-20  |
| ENSG00000133116 | KL        | -1.606373618 | 8E-07  |
| ENSG00000134962 | KLB       | -2.555177225 | 1E-15  |
| ENSG00000266265 | KLF14     | -2.6424287   | 0.0004 |
| ENSG00000163884 | KLF15     | -3.508570561 | 3E-17  |
| ENSG00000127528 | KLF2      | -1.069421594 | 8E-07  |
| ENSG00000119138 | KLF9      | -1.514035895 | 5E-08  |
| ENSG00000197776 | KLHDC1    | -1.023672337 | 0.0005 |
| ENSG00000130487 | KLHDC7B   | 1.948504951  | 0.0004 |
| ENSG00000162755 | KLHDC9    | -1.905851768 | 5E-11  |
| ENSG00000003096 | KLHL13    | -1.267830891 | 3E-05  |
| ENSG00000114648 | KLHL18    | 1.163694865  | 1E-14  |
| ENSG00000213160 | KLHL23    | -1.102122727 | 0.0002 |
| ENSG00000114796 | KLHL24    | -1.045674531 | 3E-05  |
| ENSG00000168427 | KLHL30    | -2.234630049 | 5E-09  |
| ENSG00000124743 | KLHL31    | -2.360648419 | 4E-16  |
| ENSG00000186231 | KLHL32    | -2.471378888 | 0.0318 |
| ENSG00000185271 | KLHL33    | -3.301543191 | 3E-07  |
| ENSG00000175946 | KLHL38    | -2.889056492 | 0.0108 |
| ENSG00000102271 | KLHL4     | -1.726538512 | 0.0249 |
| ENSG00000129451 | KLK10     | 2.503916062  | 3E-13  |
| ENSG00000167757 | KLK11     | 1.157443353  | 6E-07  |
| ENSG00000186474 | KLK12     | 3.918519241  | 8E-05  |

|                 |        |              |        |
|-----------------|--------|--------------|--------|
| ENSG00000167759 | KLK13  | 2.908301955  | 2E-11  |
| ENSG00000167754 | KLK5   | 2.955863287  | 8E-16  |
| ENSG00000167755 | KLK6   | 3.753895542  | 6E-17  |
| ENSG00000169035 | KLK7   | 3.492740059  | 3E-20  |
| ENSG00000129455 | KLK8   | 2.933837608  | 4E-20  |
| ENSG00000134539 | KLRD1  | -1.128757362 | 0.0223 |
| ENSG00000188883 | KLRG2  | -1.029877854 | 0.002  |
| ENSG00000182481 | KPNA2  | 1.690738477  | 2E-12  |
| ENSG00000203786 | KPRP   | 2.894661888  | 2E-12  |
| ENSG00000133619 | KRBA1  | 1.059113766  | 1E-07  |
| ENSG00000167768 | KRT1   | 2.990988392  | 4E-05  |
| ENSG00000186395 | KRT10  | 2.405818996  | 0.001  |
| ENSG00000171401 | KRT13  | 3.298425478  | 7E-05  |
| ENSG00000186847 | KRT14  | 2.510126695  | 0.0005 |
| ENSG00000171346 | KRT15  | -1.928158205 | 1E-08  |
| ENSG00000186832 | KRT16  | 6.831691076  | 3E-13  |
| ENSG00000128422 | KRT17  | 3.62302159   | 2E-08  |
| ENSG00000111057 | KRT18  | -1.864788328 | 4E-10  |
| ENSG00000171345 | KRT19  | -3.199224795 | 4E-19  |
| ENSG00000172867 | KRT2   | 2.339561827  | 0.0038 |
| ENSG00000167916 | KRT24  | 4.578049769  | 3E-09  |
| ENSG00000186442 | KRT3   | 9.84342398   | 3E-39  |
| ENSG00000131737 | KRT34  | 2.592593667  | 1E-06  |
| ENSG00000108417 | KRT37  | 7.875649635  | 1E-12  |
| ENSG00000186081 | KRT5   | 2.208722232  | 9E-13  |
| ENSG00000205420 | KRT6A  | 5.733587936  | 1E-08  |
| ENSG00000185479 | KRT6B  | 4.952558153  | 3E-17  |
| ENSG00000170465 | KRT6C  | 10.91120157  | 5E-29  |
| ENSG00000135480 | KRT7   | -2.80246385  | 1E-17  |
| ENSG00000189182 | KRT77  | -2.539308589 | 3E-22  |
| ENSG00000170423 | KRT78  | 3.407550177  | 2E-09  |
| ENSG00000170421 | KRT8   | -2.692217462 | 7E-17  |
| ENSG00000167767 | KRT80  | 2.312758058  | 1E-11  |
| ENSG00000205426 | KRT81  | -2.139136303 | 0.0002 |
| ENSG00000161850 | KRT82  | 2.244064043  | 0.0469 |
| ENSG00000170523 | KRT83  | -1.750274009 | 0.0101 |
| ENSG00000161849 | KRT84  | 3.71512721   | 4E-05  |
| ENSG00000171403 | KRT9   | 4.695927057  | 5E-29  |
| ENSG00000188508 | KRTDAP | 3.842612329  | 4E-13  |
| ENSG00000171435 | KSR2   | -2.021132068 | 0.0014 |
| ENSG00000174611 | KY     | -1.877103557 | 0.0036 |
| ENSG00000115919 | KYNU   | 1.355979061  | 0.0003 |
| ENSG00000135413 | LACRT  | -3.964074372 | 3E-05  |
| ENSG00000159166 | LAD1   | 2.706573828  | 7E-18  |
| ENSG00000167613 | LAIR1  | -2.308391415 | 2E-19  |
| ENSG00000101680 | LAMA1  | -1.008375469 | 0.007  |
| ENSG00000196569 | LAMA2  | -2.18362041  | 1E-16  |
| ENSG00000112769 | LAMA4  | -1.613159717 | 1E-09  |

|                 |          |              |        |
|-----------------|----------|--------------|--------|
| ENSG00000172037 | LAMB2    | -1.14518926  | 6E-07  |
| ENSG00000135862 | LAMC1    | -1.050851254 | 1E-05  |
| ENSG00000050555 | LAMC3    | -1.828323064 | 6E-06  |
| ENSG00000078081 | LAMP3    | 1.607166051  | 5E-06  |
| ENSG00000125869 | LAMP5    | 1.429266239  | 0.0094 |
| ENSG00000147036 | LANCL3   | 1.110048439  | 0.005  |
| ENSG00000166173 | LARP6    | -2.188611378 | 6E-22  |
| ENSG00000129988 | LBP      | -2.817072549 | 7E-06  |
| ENSG00000135338 | LCA5     | -1.518172384 | 1E-06  |
| ENSG00000186844 | LCE1A    | 2.162710557  | 8E-05  |
| ENSG00000196734 | LCE1B    | 1.981688672  | 3E-07  |
| ENSG00000197084 | LCE1C    | 2.321218287  | 1E-05  |
| ENSG00000172155 | LCE1D    | 1.474391651  | 0.0006 |
| ENSG00000186226 | LCE1E    | 2.137584303  | 2E-08  |
| ENSG00000240386 | LCE1F    | 2.504812229  | 7E-10  |
| ENSG00000187173 | LCE2A    | 2.637156013  | 6E-07  |
| ENSG00000159455 | LCE2B    | 1.915565031  | 0.0004 |
| ENSG00000187180 | LCE2C    | 2.340703363  | 1E-05  |
| ENSG00000187223 | LCE2D    | 2.444580696  | 3E-05  |
| ENSG00000185962 | LCE3A    | 8.904373834  | 8E-38  |
| ENSG00000244057 | LCE3C    | 8.271799464  | 1E-13  |
| ENSG00000163202 | LCE3D    | 7.20099043   | 7E-29  |
| ENSG00000185966 | LCE3E    | 8.640650259  | 1E-21  |
| ENSG00000187170 | LCE4A    | 2.364613099  | 0.0002 |
| ENSG00000186207 | LCE5A    | -1.163546349 | 0.0286 |
| ENSG00000235942 | LCE6A    | 2.536941697  | 1E-10  |
| ENSG00000205629 | LCMT1    | 1.032187732  | 2E-07  |
| ENSG00000148346 | LCN2     | 2.45318364   | 0.0002 |
| ENSG00000169744 | LDB2     | -1.456097171 | 4E-08  |
| ENSG00000122367 | LDB3     | -1.744041717 | 4E-08  |
| ENSG00000134333 | LDHA     | 1.096582155  | 6E-05  |
| ENSG00000166816 | LDHD     | -1.270305438 | 0.0002 |
| ENSG00000130164 | LDLR     | 1.472581486  | 1E-17  |
| ENSG00000168675 | LDLRAD4  | -1.853742707 | 1E-09  |
| ENSG00000143768 | LEFTY2   | -2.971971323 | 0.0003 |
| ENSG00000186007 | LEMD1    | 3.101860031  | 2E-10  |
| ENSG00000166477 | LEO1     | 1.120094694  | 1E-19  |
| ENSG00000174697 | LEP      | -5.536630812 | 2E-15  |
| ENSG00000116678 | LEPR     | -1.646365685 | 3E-07  |
| ENSG00000104660 | LEPROTL1 | 1.009004176  | 4E-06  |
| ENSG00000162398 | LEXM     | 3.677978936  | 3E-10  |
| ENSG00000106003 | LFNG     | -1.116081646 | 1E-09  |
| ENSG00000100097 | LGALS1   | -1.034532784 | 4E-06  |
| ENSG00000133317 | LGALS12  | -4.64318505  | 7E-12  |
| ENSG00000171747 | LGALS4   | -1.101974214 | 0.0002 |
| ENSG00000205076 | LGALS7   | 2.128349548  | 1E-09  |
| ENSG00000178934 | LGALS7B  | 2.092476102  | 2E-12  |
| ENSG00000170298 | LGALS9B  | 3.829442848  | 4E-15  |

|                 |           |              |        |
|-----------------|-----------|--------------|--------|
| ENSG00000171916 | LGALS9C   | 4.00922991   | 1E-15  |
| ENSG00000119862 | LGALSL    | 1.516057878  | 2E-08  |
| ENSG00000108231 | LGI1      | -3.240302727 | 0.0123 |
| ENSG00000153902 | LGI4      | -2.241264705 | 1E-12  |
| ENSG00000139292 | LGR5      | -2.897832273 | 2E-05  |
| ENSG00000138039 | LHCGR     | -3.674653364 | 5E-08  |
| ENSG00000182508 | LHFPL1    | -3.164861653 | 2E-06  |
| ENSG00000183722 | LHFPL6    | -1.639782085 | 5E-11  |
| ENSG00000121454 | LHX4      | 2.153608633  | 0.0233 |
| ENSG00000106852 | LHX6      | -1.330433689 | 5E-06  |
| ENSG00000128342 | LIF       | -1.78322984  | 0.0002 |
| ENSG00000113594 | LIFR      | -2.587542439 | 2E-20  |
| ENSG00000244482 | LILRA6    | -1.370707789 | 0.0099 |
| ENSG00000104972 | LILRB1    | -1.125267679 | 9E-05  |
| ENSG00000186818 | LILRB4    | -1.657030746 | 4E-05  |
| ENSG00000105609 | LILRB5    | -1.947455542 | 2E-07  |
| ENSG00000072163 | LIMS2     | -1.803042488 | 2E-18  |
| ENSG00000111052 | LIN7A     | -1.536002915 | 0.0005 |
| ENSG00000263874 | LINC00672 | -1.378133829 | 0.001  |
| ENSG00000169783 | LINGO1    | -1.122058016 | 6E-07  |
| ENSG00000213171 | LINGO4    | -3.148917211 | 3E-06  |
| ENSG00000166035 | LIPC      | -1.644998982 | 0.0008 |
| ENSG00000079435 | LIPE      | -3.827639432 | 4E-23  |
| ENSG00000101670 | LIPG      | 3.390783263  | 6E-08  |
| ENSG00000163898 | LIPH      | -1.329997651 | 4E-07  |
| ENSG00000204021 | LIPK      | 1.236230175  | 0.0003 |
| ENSG00000173239 | LIPM      | 2.265318961  | 4E-11  |
| ENSG00000204020 | LIPN      | 2.851143053  | 2E-12  |
| ENSG00000271601 | LIX1L     | -1.001199684 | 2E-06  |
| ENSG00000071282 | LMCD1     | -1.747356102 | 4E-15  |
| ENSG00000113368 | LMNB1     | 1.485796973  | 2E-05  |
| ENSG00000176619 | LMNB2     | 1.262349658  | 1E-05  |
| ENSG00000048540 | LMO3      | -3.021189515 | 7E-18  |
| ENSG00000163431 | LMOD1     | -2.689031375 | 6E-30  |
| ENSG00000163380 | LMOD3     | -1.496388978 | 0.0418 |
| ENSG00000162761 | LMX1A     | -3.536011698 | 0.0003 |
| ENSG00000136944 | LMX1B     | -1.123750527 | 7E-06  |
| ENSG00000170500 | LONRF2    | -2.691188484 | 5E-10  |
| ENSG00000175556 | LONRF3    | -2.272408328 | 5E-09  |
| ENSG00000203782 | LOR       | 3.380373368  | 3E-09  |
| ENSG00000113083 | LOX       | -1.254775497 | 0.0006 |
| ENSG00000167210 | LOXHD1    | 1.300262713  | 0.0195 |
| ENSG00000138131 | LOXL4     | -2.687995676 | 2E-17  |
| ENSG00000198121 | LPAR1     | -1.752173649 | 1E-07  |
| ENSG00000171517 | LPAR3     | 1.179599289  | 1E-06  |
| ENSG00000175445 | LPL       | -4.31414697  | 5E-26  |
| ENSG00000121207 | LRAT      | 1.369428573  | 0.0196 |
| ENSG00000130224 | LRCH2     | -1.861606939 | 9E-05  |

|                 |         |              |        |
|-----------------|---------|--------------|--------|
| ENSG00000156564 | LRFN2   | 1.756000482  | 0.0196 |
| ENSG00000165379 | LRFN5   | -3.266162357 | 3E-07  |
| ENSG00000144749 | LRIG1   | -1.920995993 | 2E-24  |
| ENSG00000148655 | LRMDA   | -1.153919968 | 4E-05  |
| ENSG00000123384 | LRP1    | -1.391723279 | 3E-10  |
| ENSG00000168702 | LRP1B   | -3.064191711 | 2E-07  |
| ENSG00000130881 | LRP3    | -1.032169123 | 8E-09  |
| ENSG00000157193 | LRP8    | 1.465298345  | 2E-10  |
| ENSG00000204950 | LRRC10B | -2.034175825 | 0.0031 |
| ENSG00000128606 | LRRC17  | -1.176315459 | 0.0128 |
| ENSG00000165383 | LRRC18  | -2.062932151 | 0.0322 |
| ENSG00000163827 | LRRC2   | -2.425078062 | 4E-09  |
| ENSG00000172731 | LRRC20  | 1.784982323  | 6E-08  |
| ENSG00000175489 | LRRC25  | -1.070093329 | 0.0194 |
| ENSG00000184709 | LRRC26  | -2.753750741 | 0.0336 |
| ENSG00000137507 | LRRC32  | -1.629519967 | 5E-11  |
| ENSG00000171757 | LRRC34  | -1.157359471 | 0.0067 |
| ENSG00000159708 | LRRC36  | -2.760169938 | 0.0002 |
| ENSG00000128594 | LRRC4   | 2.472201193  | 1E-08  |
| ENSG00000158113 | LRRC43  | -1.49480879  | 0.0014 |
| ENSG00000148948 | LRRC4C  | -2.166827982 | 1E-06  |
| ENSG00000108829 | LRRC59  | 1.254344985  | 6E-08  |
| ENSG00000127399 | LRRC61  | 1.677379853  | 7E-07  |
| ENSG00000181350 | LRRC75A | -1.8754024   | 4E-09  |
| ENSG00000133640 | LRRIQ1  | -1.36679475  | 0.0024 |
| ENSG00000175928 | LRRN1   | -1.812094371 | 9E-06  |
| ENSG00000170382 | LRRN2   | -1.870991581 | 0.0059 |
| ENSG00000173114 | LRRN3   | -1.983512759 | 3E-12  |
| ENSG00000177363 | LRRN4CL | -2.200072279 | 4E-12  |
| ENSG00000146006 | LRRTM2  | -2.619762475 | 7E-05  |
| ENSG00000184154 | LRTOMT  | -1.063542026 | 0.0002 |
| ENSG00000179564 | LSMEM2  | -3.47567498  | 0.0024 |
| ENSG00000213903 | LTB4R   | 1.341609578  | 2E-08  |
| ENSG00000213906 | LTB4R2  | 1.882467907  | 4E-09  |
| ENSG00000168056 | LTBP3   | -1.422882881 | 2E-15  |
| ENSG00000090006 | LTBP4   | -1.21546084  | 1E-08  |
| ENSG00000213316 | LTC4S   | -1.037986875 | 0.0167 |
| ENSG00000062524 | LTK     | -1.066413885 | 0.0096 |
| ENSG00000108848 | LUC7L3  | -1.209942721 | 0.0006 |
| ENSG00000187398 | LUZP2   | -1.724028994 | 0.0003 |
| ENSG00000172901 | LVRN    | -3.467183849 | 1E-13  |
| ENSG00000167656 | LY6D    | 2.81903448   | 8E-14  |
| ENSG00000204421 | LY6G6C  | 3.07887734   | 7E-13  |
| ENSG00000160886 | LY6K    | 1.139115537  | 0.0062 |
| ENSG00000054219 | LY75    | -1.391504682 | 4E-07  |
| ENSG00000122224 | LY9     | -1.056314931 | 0.0049 |
| ENSG00000150551 | LYPD1   | 1.991797195  | 3E-06  |
| ENSG00000197353 | LYPD2   | 2.828385962  | 4E-06  |

|                 |          |              |        |
|-----------------|----------|--------------|--------|
| ENSG00000124466 | LYPD3    | 2.70559937   | 4E-13  |
| ENSG00000159871 | LYPD5    | 2.636155491  | 2E-09  |
| ENSG00000120992 | LYPLA1   | 1.353988239  | 8E-08  |
| ENSG00000232859 | LYRM9    | -1.636060328 | 1E-11  |
| ENSG00000133800 | LYVE1    | -1.771571742 | 4E-06  |
| ENSG00000088899 | LZTS3    | -1.209973789 | 7E-10  |
| ENSG00000159374 | M1AP     | -2.153345216 | 6E-05  |
| ENSG00000183833 | MAATS1   | -2.932228584 | 4E-12  |
| ENSG00000180660 | MAB21L1  | -4.291185714 | 0.0001 |
| ENSG00000172264 | MACROD2  | -1.964678685 | 3E-08  |
| ENSG00000164109 | MAD2L1   | 1.566091194  | 1E-07  |
| ENSG00000178573 | MAF      | 1.007354199  | 0.0001 |
| ENSG00000204103 | MAFB     | 1.350742345  | 3E-10  |
| ENSG00000187391 | MAGI2    | -1.583967381 | 2E-15  |
| ENSG00000111837 | MAK      | 2.206761117  | 0.0114 |
| ENSG00000172005 | MAL      | -1.083143154 | 2E-05  |
| ENSG00000147676 | MAL2     | 1.812459884  | 1E-10  |
| ENSG00000144063 | MALL     | 1.696611483  | 6E-06  |
| ENSG00000165072 | MAMDC2   | -1.873913054 | 5E-11  |
| ENSG00000184384 | MAML2    | -1.036490389 | 1E-05  |
| ENSG00000117643 | MAN1C1   | -1.035921736 | 0.0042 |
| ENSG00000196547 | MAN2A2   | -1.191915455 | 1E-09  |
| ENSG00000145050 | MANF     | 1.177994395  | 1E-10  |
| ENSG00000189221 | MAOA     | -2.045723426 | 9E-15  |
| ENSG00000166963 | MAP1A    | -1.873579027 | 5E-08  |
| ENSG00000131711 | MAP1B    | -1.495923046 | 2E-07  |
| ENSG00000197769 | MAP1LC3C | -3.047763134 | 5E-11  |
| ENSG00000078018 | MAP2     | 1.249910556  | 3E-08  |
| ENSG00000107968 | MAP3K8   | 1.102054788  | 3E-12  |
| ENSG00000006432 | MAP3K9   | 1.895290668  | 4E-20  |
| ENSG00000171533 | MAP6     | -2.963298576 | 2E-33  |
| ENSG00000135525 | MAP7     | 1.104618779  | 3E-17  |
| ENSG00000109339 | MAPK10   | -2.105076583 | 6E-12  |
| ENSG00000156711 | MAPK13   | 1.715316707  | 9E-12  |
| ENSG00000181085 | MAPK15   | -1.393971036 | 0.0003 |
| ENSG00000141639 | MAPK4    | -2.67715221  | 1E-09  |
| ENSG00000069956 | MAPK6    | 1.777426103  | 5E-23  |
| ENSG00000166484 | MAPK7    | 1.048612663  | 1E-06  |
| ENSG00000121653 | MAPK8IP1 | -1.200742098 | 4E-07  |
| ENSG00000114738 | MAPKAPK3 | 1.245340733  | 1E-05  |
| ENSG00000186868 | MAPT     | -1.395894842 | 4E-05  |
| ENSG00000186205 | MARC1    | -3.017797184 | 2E-20  |
| ENSG00000117791 | MARC2    | -2.179395085 | 4E-13  |
| ENSG00000173926 | MARCH3   | 1.114098864  | 0.0003 |
| ENSG00000019169 | MARCO    | -1.331842734 | 4E-05  |
| ENSG00000166986 | MARS     | 1.088278084  | 1E-11  |
| ENSG00000204687 | MAS1L    | -2.765608759 | 0.0057 |
| ENSG00000151224 | MAT1A    | -3.574632507 | 3E-10  |

|                 |         |              |        |
|-----------------|---------|--------------|--------|
| ENSG00000007264 | MATK    | -1.26121937  | 0.0015 |
| ENSG00000132561 | MATN2   | -1.330689549 | 2E-13  |
| ENSG00000132031 | MATN3   | -1.723279207 | 1E-08  |
| ENSG00000124159 | MATN4   | -2.113258667 | 0.0053 |
| ENSG00000198125 | MB      | -2.285291292 | 4E-10  |
| ENSG00000143797 | MBOAT2  | 1.707795867  | 1E-11  |
| ENSG00000076706 | MCAM    | -1.078439151 | 0.0004 |
| ENSG00000126217 | MCF2L   | -1.431540263 | 1E-08  |
| ENSG00000128285 | MCHR1   | 2.329727437  | 5E-06  |
| ENSG00000065328 | MCM10   | 1.559721489  | 1E-07  |
| ENSG00000055732 | MCOLN3  | -1.152284783 | 0.0006 |
| ENSG00000005059 | MCUB    | 1.271294126  | 9E-07  |
| ENSG00000112559 | MDFI    | 1.446748485  | 4E-06  |
| ENSG00000110492 | MDK     | -1.049830092 | 7E-05  |
| ENSG00000151376 | ME3     | -1.161090571 | 2E-11  |
| ENSG00000159479 | MED8    | 1.369352724  | 2E-07  |
| ENSG00000102802 | MEDAG   | -1.279136423 | 7E-08  |
| ENSG00000081189 | MEF2C   | -1.124487734 | 3E-05  |
| ENSG00000145794 | MEGF10  | -2.110601392 | 1E-06  |
| ENSG00000162591 | MEGF6   | -1.471814201 | 0.0002 |
| ENSG00000165304 | MELK    | 1.917824781  | 7E-14  |
| ENSG00000163975 | MELTF   | -2.694280718 | 3E-13  |
| ENSG00000005102 | MEOX1   | -1.517404014 | 2E-09  |
| ENSG00000106511 | MEOX2   | -1.834702286 | 2E-09  |
| ENSG00000153208 | MERTK   | -1.899989737 | 4E-08  |
| ENSG00000166823 | MESP1   | -1.996043733 | 2E-05  |
| ENSG00000188095 | MESP2   | 1.521845748  | 0.0004 |
| ENSG00000106484 | MEST    | -2.224867799 | 4E-13  |
| ENSG00000176845 | METRNL  | 1.413934985  | 1E-06  |
| ENSG00000165171 | METTL27 | -2.085094271 | 6E-06  |
| ENSG00000170439 | METTL7B | -2.496281426 | 0.0021 |
| ENSG00000166482 | MFAP4   | -2.796981522 | 1E-14  |
| ENSG00000197614 | MFAP5   | -2.646332179 | 7E-11  |
| ENSG00000147324 | MFHAS1  | 1.604864053  | 7E-23  |
| ENSG00000100060 | MFNG    | -1.11879606  | 1E-05  |
| ENSG00000205639 | MFSD2B  | 2.587372149  | 3E-07  |
| ENSG00000174514 | MFSD4A  | -3.241672533 | 2E-27  |
| ENSG00000182544 | MFSD5   | 1.223409617  | 9E-06  |
| ENSG00000257743 | MGAM2   | -1.779538047 | 0.0067 |
| ENSG00000128268 | MGAT3   | -2.145648618 | 1E-24  |
| ENSG00000071073 | MGAT4A  | -1.010287027 | 2E-11  |
| ENSG00000074416 | MGLL    | -1.04977108  | 4E-10  |
| ENSG00000111341 | MGP     | -2.237993375 | 4E-16  |
| ENSG00000008394 | MGST1   | -1.050443855 | 0.0079 |
| ENSG00000100139 | MICALL1 | 1.54321035   | 2E-16  |
| ENSG00000155970 | MICU3   | -2.154468289 | 1E-07  |
| ENSG00000080561 | MID2    | 1.000988695  | 0.0029 |
| ENSG00000271605 | MILR1   | -1.192411196 | 0.0007 |



|                 |         |              |        |
|-----------------|---------|--------------|--------|
| ENSG00000151338 | MIPOL1  | -1.185523763 | 4E-05  |
| ENSG00000187098 | MITF    | -1.012171737 | 0.0001 |
| ENSG00000148773 | MKI67   | 1.072623688  | 0.0026 |
| ENSG00000150051 | MKX     | -2.272571135 | 4E-05  |
| ENSG00000120215 | MLANA   | 1.200462554  | 0.0002 |
| ENSG00000100427 | MLC1    | -1.613855018 | 4E-05  |
| ENSG00000146147 | MLIP    | 1.211763262  | 0.0364 |
| ENSG00000213190 | MLLT11  | 1.114863885  | 1E-06  |
| ENSG00000115648 | MLPH    | -1.670476764 | 2E-11  |
| ENSG00000009950 | MLXIPL  | -3.458194581 | 3E-15  |
| ENSG00000168288 | MMADHC  | 1.018004213  | 3E-06  |
| ENSG00000108960 | MMD     | -1.644354279 | 7E-12  |
| ENSG00000196549 | MME     | -2.4651369   | 5E-05  |
| ENSG00000142606 | MMEL1   | -2.559720475 | 0.0025 |
| ENSG00000196611 | MMP1    | 9.264806785  | 1E-19  |
| ENSG00000166670 | MMP10   | 8.934149243  | 3E-09  |
| ENSG00000099953 | MMP11   | 1.036140808  | 0.0121 |
| ENSG00000262406 | MMP12   | 1.60836964   | 0.0429 |
| ENSG00000137745 | MMP13   | 2.10462534   | 0.0008 |
| ENSG00000087245 | MMP2    | -1.449518981 | 9E-05  |
| ENSG00000125966 | MMP24   | -1.099668136 | 0.0225 |
| ENSG00000137675 | MMP27   | -1.211514302 | 0.0182 |
| ENSG00000149968 | MMP3    | 2.735583692  | 0.006  |
| ENSG00000137673 | MMP7    | -2.610703537 | 4E-17  |
| ENSG00000173269 | MMRN2   | -1.065035633 | 2E-06  |
| ENSG00000121211 | MND1    | 1.005334056  | 0.0063 |
| ENSG00000101928 | MOSPD1  | 1.027940917  | 7E-08  |
| ENSG00000107186 | MPDZ    | -1.574542167 | 4E-10  |
| ENSG00000197629 | MPEG1   | -1.056921976 | 0.0007 |
| ENSG00000117400 | MPL     | 3.148390307  | 5E-05  |
| ENSG00000082126 | MPP4    | -1.236607935 | 0.0366 |
| ENSG00000150054 | MPP7    | 1.347100857  | 2E-11  |
| ENSG00000186732 | MPPED1  | -3.458765915 | 1E-06  |
| ENSG00000066382 | MPPED2  | -2.353465413 | 2E-10  |
| ENSG00000156968 | MPV17L  | -1.631971752 | 4E-10  |
| ENSG00000158887 | MPZ     | -1.914050072 | 1E-09  |
| ENSG00000149573 | MPZL2   | 2.337890358  | 2E-22  |
| ENSG00000160588 | MPZL3   | 2.179672036  | 9E-17  |
| ENSG00000170262 | MRAP    | -3.745004752 | 4E-17  |
| ENSG00000158186 | MRAS    | -2.755219498 | 3E-32  |
| ENSG00000260314 | MRC1    | -1.359912398 | 1E-05  |
| ENSG00000118242 | MREG    | 1.964756711  | 3E-20  |
| ENSG00000172935 | MRGPRF  | -1.242755944 | 3E-05  |
| ENSG00000183695 | MRGPRX2 | -2.06982634  | 0.0264 |
| ENSG00000134042 | MRO     | -3.054876764 | 3E-05  |
| ENSG00000184313 | MROH7   | -2.018083631 | 5E-06  |
| ENSG00000172172 | MRPL13  | 1.15456117   | 5E-06  |
| ENSG00000180992 | MRPL14  | 1.025339634  | 2E-07  |

|                 |          |              |        |
|-----------------|----------|--------------|--------|
| ENSG00000108826 | MRPL27   | 1.019893701  | 7E-08  |
| ENSG00000111639 | MRPL51   | 1.042348858  | 3E-07  |
| ENSG00000072952 | MRV11    | -1.028167959 | 3E-06  |
| ENSG00000166928 | MS4A14   | -1.380636884 | 0.0047 |
| ENSG00000149534 | MS4A2    | -1.352812921 | 0.0003 |
| ENSG00000110079 | MS4A4A   | -1.995789083 | 3E-06  |
| ENSG00000214787 | MS4A4E   | -1.706664527 | 0.0075 |
| ENSG00000166926 | MS4A6E   | -3.298294452 | 0.0315 |
| ENSG00000166927 | MS4A7    | -1.012684894 | 0.0106 |
| ENSG00000188981 | MSANTD1  | -1.483943844 | 0.0435 |
| ENSG00000066697 | MSANTD3  | 1.00443871   | 2E-08  |
| ENSG00000057468 | MSH4     | -2.650351333 | 0.0369 |
| ENSG00000135097 | MSI1     | -1.895910448 | 0.0002 |
| ENSG00000102854 | MSLN     | -2.019759344 | 0.0055 |
| ENSG00000052802 | MSMO1    | 1.024132623  | 0.0086 |
| ENSG00000215183 | MSMP     | 2.001840063  | 0.0041 |
| ENSG00000038945 | MSR1     | -1.489885461 | 2E-05  |
| ENSG00000174099 | MSRB3    | -1.715162775 | 4E-14  |
| ENSG00000138379 | MSTN     | -2.628279888 | 3E-06  |
| ENSG00000163132 | MSX1     | -1.539846055 | 4E-09  |
| ENSG00000198763 | MT-ND2   | -1.083466304 | 1E-06  |
| ENSG00000198840 | MT-ND3   | -1.089008576 | 3E-08  |
| ENSG00000198786 | MT-ND5   | -1.004762427 | 0.0002 |
| ENSG00000125148 | MT2A     | 1.197456451  | 0.004  |
| ENSG00000168502 | MTCL1    | 1.4369715    | 6E-12  |
| ENSG00000146410 | MTFR2    | 1.854262161  | 8E-07  |
| ENSG00000120254 | MTHFD1L  | 1.284700597  | 6E-07  |
| ENSG00000003987 | MTMR7    | -2.94985002  | 3E-11  |
| ENSG00000116984 | MTR      | -1.016694883 | 3E-05  |
| ENSG00000256618 | MTRNR2L1 | -1.078227314 | 0.0073 |
| ENSG00000180354 | MTURN    | -1.540403384 | 6E-17  |
| ENSG00000132938 | MTUS2    | -1.453626739 | 0.0271 |
| ENSG00000181143 | MUC16    | -2.830905826 | 7E-20  |
| ENSG00000176945 | MUC20    | -1.994146539 | 7E-10  |
| ENSG00000117983 | MUC5B    | -2.519530612 | 9E-08  |
| ENSG00000171195 | MUC7     | -3.586331306 | 4E-13  |
| ENSG00000172551 | MUCL1    | -2.566025047 | 5E-27  |
| ENSG00000110921 | MVK      | 1.036615234  | 8E-06  |
| ENSG00000157601 | MX1      | 1.399523117  | 3E-07  |
| ENSG00000059728 | MXD1     | 2.387730212  | 7E-15  |
| ENSG00000182534 | MXRA7    | -1.098167385 | 2E-10  |
| ENSG00000162576 | MXRA8    | -1.739252958 | 2E-10  |
| ENSG00000179820 | MYADM    | -1.086327379 | 0.0007 |
| ENSG00000101057 | MYBL2    | 2.359429501  | 2E-09  |
| ENSG00000196091 | MYBPC1   | -2.872838046 | 1E-14  |
| ENSG00000136997 | MYC      | 1.213873732  | 1E-08  |
| ENSG00000136449 | MYCBPAP  | 1.333316565  | 0.004  |
| ENSG00000116990 | MYCL     | 1.363783938  | 0.0002 |

|                 |          |              |        |
|-----------------|----------|--------------|--------|
| ENSG00000120279 | MYCT1    | -1.180404079 | 4E-05  |
| ENSG00000172936 | MYD88    | 1.186070435  | 1E-08  |
| ENSG00000104177 | MYEF2    | -1.965309037 | 9E-19  |
| ENSG00000172927 | MYEOV    | -2.936834657 | 2E-29  |
| ENSG00000109061 | MYH1     | -4.360670973 | 0.0003 |
| ENSG00000133392 | MYH11    | -2.725022124 | 1E-17  |
| ENSG00000006788 | MYH13    | 5.152342352  | 1E-06  |
| ENSG00000105357 | MYH14    | -1.530035646 | 5E-05  |
| ENSG00000144821 | MYH15    | 1.399962511  | 0.0086 |
| ENSG00000109063 | MYH3     | -1.637972519 | 7E-09  |
| ENSG00000078814 | MYH7B    | -2.069578727 | 5E-05  |
| ENSG00000160808 | MYL3     | -1.847872605 | 0.0087 |
| ENSG00000198336 | MYL4     | -2.760779748 | 3E-05  |
| ENSG00000101335 | MYL9     | -2.108487963 | 2E-26  |
| ENSG00000065534 | MYLK     | -1.63319347  | 2E-11  |
| ENSG00000180209 | MYLPF    | -1.92793411  | 0.0006 |
| ENSG00000262179 | MYMX     | -3.798769805 | 9E-08  |
| ENSG00000091536 | MYO15A   | -2.074836346 | 1E-06  |
| ENSG00000266714 | MYO15B   | -1.112656073 | 3E-06  |
| ENSG00000041515 | MYO16    | -1.344029057 | 0.0233 |
| ENSG00000128641 | MYO1B    | 1.669175593  | 2E-09  |
| ENSG00000174527 | MYO1H    | 3.35926754   | 8E-11  |
| ENSG00000095777 | MYO3A    | -3.314675561 | 3E-07  |
| ENSG00000071909 | MYO3B    | -1.109895123 | 0.014  |
| ENSG00000197535 | MYO5A    | 1.110425806  | 4E-08  |
| ENSG00000128833 | MYO5C    | -1.483644914 | 2E-21  |
| ENSG00000137474 | MYO7A    | -1.850706141 | 4E-07  |
| ENSG00000034971 | MYOC     | -4.843838742 | 7E-22  |
| ENSG00000141052 | MYOCD    | -2.279386273 | 9E-10  |
| ENSG00000101605 | MYOM1    | -2.783510569 | 3E-19  |
| ENSG00000036448 | MYOM2    | -1.116946027 | 6E-05  |
| ENSG00000142661 | MYOM3    | 1.95959399   | 4E-11  |
| ENSG00000120729 | MYOT     | -1.599279486 | 0.024  |
| ENSG00000177791 | MYOZ1    | -1.092199272 | 0.0087 |
| ENSG00000124920 | MYRF     | -2.367216273 | 7E-05  |
| ENSG00000170011 | MYRIP    | -2.312356166 | 3E-09  |
| ENSG00000139597 | N4BP2L1  | -1.80372997  | 2E-11  |
| ENSG00000077616 | NAALAD2  | -2.429881592 | 6E-15  |
| ENSG00000177694 | NAALADL2 | -1.892108213 | 5E-12  |
| ENSG00000173559 | NABP1    | 1.095814007  | 0.0001 |
| ENSG00000136274 | NACAD    | -1.640930053 | 8E-05  |
| ENSG00000161653 | NAGS     | 1.593594651  | 0.0006 |
| ENSG00000102452 | NALCN    | -2.531477564 | 4E-05  |
| ENSG00000186462 | NAP1L2   | -1.416733775 | 1E-06  |
| ENSG00000186310 | NAP1L3   | -1.971890995 | 7E-05  |
| ENSG00000185818 | NAT8L    | -3.439941639 | 9E-16  |
| ENSG00000172915 | NBEA     | -2.475792554 | 7E-14  |
| ENSG00000160796 | NBEAL2   | 1.029971255  | 0.0004 |

|                 |          |              |        |
|-----------------|----------|--------------|--------|
| ENSG00000263956 | NBPF11   | -1.157604674 | 0.0004 |
| ENSG00000104490 | NCALD    | -2.915617918 | 5E-35  |
| ENSG00000149294 | NCAM1    | -1.32481186  | 3E-06  |
| ENSG00000154654 | NCAM2    | -1.062301275 | 0.049  |
| ENSG00000109805 | NCAPG    | 1.52186547   | 3E-08  |
| ENSG00000121152 | NCAPH    | 1.382195042  | 1E-05  |
| ENSG00000188505 | NCCRP1   | 3.485363047  | 1E-20  |
| ENSG00000020129 | NCDN     | 1.018016473  | 3E-06  |
| ENSG00000144959 | NCEH1    | -1.810305862 | 2E-18  |
| ENSG00000184454 | NCMAP    | -2.618554301 | 7E-09  |
| ENSG00000189430 | NCR1     | 2.349470209  | 0.047  |
| ENSG00000080986 | NDC80    | 1.057705161  | 0.0014 |
| ENSG00000166579 | NDEL1    | 1.264887227  | 1E-08  |
| ENSG00000102471 | NDFIP2   | 1.157246457  | 8E-14  |
| ENSG00000182636 | NDN      | -1.312502509 | 7E-10  |
| ENSG00000173376 | NDNF     | -3.392949445 | 5E-13  |
| ENSG00000104419 | NDRG1    | 1.069781539  | 2E-05  |
| ENSG00000165795 | NDRG2    | -1.18467296  | 5E-15  |
| ENSG00000103034 | NDRG4    | 1.905105989  | 4E-18  |
| ENSG00000166507 | NDST2    | -1.590272869 | 0.0005 |
| ENSG00000185633 | NDUFA4L2 | 2.386832192  | 1E-13  |
| ENSG00000123119 | NECAB1   | -3.732996137 | 4E-13  |
| ENSG00000110400 | NECTIN1  | 1.839200137  | 4E-09  |
| ENSG00000177707 | NECTIN3  | -1.415123727 | 4E-05  |
| ENSG00000143217 | NECTIN4  | 1.132470629  | 8E-07  |
| ENSG00000049759 | NEDD4L   | -1.280677493 | 1E-09  |
| ENSG00000111859 | NEDD9    | -1.414412159 | 5E-06  |
| ENSG00000277586 | NEFL     | 2.157212283  | 2E-05  |
| ENSG00000104722 | NEFM     | 3.52169614   | 2E-11  |
| ENSG00000172260 | NEGR1    | -2.144832333 | 6E-11  |
| ENSG00000140398 | NEIL1    | -1.222196157 | 0.0002 |
| ENSG00000117650 | NEK2     | 1.52071877   | 4E-05  |
| ENSG00000119408 | NEK6     | -1.024897685 | 4E-05  |
| ENSG00000165973 | NELL1    | -2.635718042 | 9E-06  |
| ENSG00000184613 | NELL2    | 3.755099077  | 2E-30  |
| ENSG00000132688 | NES      | -1.06843593  | 2E-09  |
| ENSG00000171208 | NETO2    | 3.022311644  | 2E-16  |
| ENSG00000115488 | NEU2     | 4.884669334  | 2E-10  |
| ENSG00000163121 | NEURL3   | -3.277450994 | 2E-06  |
| ENSG00000171532 | NEUROD2  | -3.28245078  | 1E-05  |
| ENSG00000050030 | NEXMIF   | -1.731679124 | 9E-06  |
| ENSG00000162614 | NEXN     | -2.138418065 | 2E-16  |
| ENSG00000123405 | NFE2     | 1.195673168  | 0.0003 |
| ENSG00000050344 | NFE2L3   | 1.309742119  | 3E-09  |
| ENSG00000147862 | NFIB     | -1.286477086 | 2E-06  |
| ENSG00000134259 | NGF      | 2.657697636  | 2E-09  |
| ENSG00000064300 | NGFR     | -1.836852506 | 7E-14  |
| ENSG00000257108 | NHLRC4   | -2.320786768 | 0.0052 |

|                 |           |              |        |
|-----------------|-----------|--------------|--------|
| ENSG00000145912 | NHP2      | 1.029488249  | 1E-06  |
| ENSG00000204131 | NHSL2     | -1.09569935  | 0.0003 |
| ENSG00000177453 | NIM1K     | -1.095939971 | 0.0117 |
| ENSG00000131669 | NINJ1     | -1.137617924 | 6E-08  |
| ENSG00000101004 | NINL      | -1.02623783  | 0.0009 |
| ENSG00000163293 | NIPAL1    | 1.401251314  | 6E-15  |
| ENSG00000104361 | NIPAL2    | 1.127995339  | 9E-11  |
| ENSG00000172548 | NIPAL4    | 2.558659947  | 2E-13  |
| ENSG00000165028 | NIPSNAP3B | -1.560346242 | 6E-10  |
| ENSG00000084628 | NKAIN1    | 3.249916639  | 2E-08  |
| ENSG00000189134 | NKAPL     | -1.12703027  | 2E-05  |
| ENSG00000179846 | NKPD1     | 1.41698875   | 4E-09  |
| ENSG00000114857 | NKTR      | -1.046856969 | 0.001  |
| ENSG00000169760 | NLGN1     | -2.022073716 | 3E-07  |
| ENSG00000196338 | NLGN3     | -1.035501179 | 0.0136 |
| ENSG00000146938 | NLGN4X    | 1.893354272  | 3E-06  |
| ENSG00000182261 | NLRP10    | 2.400829057  | 7E-10  |
| ENSG00000142405 | NLRP12    | -1.319107982 | 0.0475 |
| ENSG00000022556 | NLRP2     | 1.962277187  | 4E-24  |
| ENSG00000160703 | NLRX1     | 1.610603916  | 3E-12  |
| ENSG00000112981 | NME5      | -1.606885306 | 0.0079 |
| ENSG00000123609 | NMI       | 1.325467882  | 1E-11  |
| ENSG00000157064 | NMNAT2    | -1.855207134 | 5E-08  |
| ENSG00000109255 | NMU       | 3.118935621  | 7E-18  |
| ENSG00000171596 | NMUR1     | -3.417899845 | 2E-12  |
| ENSG00000053438 | NNAT      | -3.374284919 | 2E-20  |
| ENSG00000151014 | NOCT      | 1.885929115  | 7E-07  |
| ENSG00000167207 | NOD2      | 1.776879977  | 2E-22  |
| ENSG00000156574 | NODAL     | 2.642869793  | 0.006  |
| ENSG00000183691 | NOG       | -2.272177752 | 0.0016 |
| ENSG00000101746 | NOL4      | -3.656559    | 1E-04  |
| ENSG00000182117 | NOP10     | 1.337513858  | 1E-06  |
| ENSG00000048162 | NOP16     | 1.226549499  | 2E-08  |
| ENSG00000198929 | NOS1AP    | -1.487462508 | 0.0002 |
| ENSG00000007171 | NOS2      | -3.977884974 | 9E-07  |
| ENSG00000163072 | NOSTRIN   | -1.931697686 | 2E-20  |
| ENSG00000204301 | NOTCH4    | -1.109235565 | 1E-07  |
| ENSG00000185269 | NOTUM     | -1.506897568 | 3E-05  |
| ENSG00000136999 | NOV       | -1.404715027 | 4E-16  |
| ENSG00000139910 | NOVA1     | -3.095009564 | 7E-18  |
| ENSG00000255346 | NOX5      | 1.386545918  | 0.0001 |
| ENSG00000151322 | NPAS3     | -2.190693565 | 6E-06  |
| ENSG00000107281 | NPDC1     | -1.08806724  | 4E-06  |
| ENSG00000144061 | NPHP1     | -1.430080179 | 4E-06  |
| ENSG00000234719 | NPIP2     | -1.105206469 | 4E-05  |
| ENSG00000158806 | NPM2      | -1.14124085  | 0.0072 |
| ENSG00000107833 | NPM3      | 1.124141992  | 1E-05  |
| ENSG00000169418 | NPR1      | -2.072929844 | 3E-23  |

|                 |        |              |        |
|-----------------|--------|--------------|--------|
| ENSG00000171246 | NPTX1  | 2.567838054  | 0.0032 |
| ENSG00000221890 | NPTXR  | -2.312449078 | 7E-18  |
| ENSG00000164128 | NPY1R  | -2.658675136 | 3E-20  |
| ENSG00000164129 | NPY5R  | -3.441927838 | 3E-13  |
| ENSG00000025434 | NR1H3  | -1.522127899 | 2E-13  |
| ENSG00000112333 | NR2E1  | 2.675796181  | 0.0127 |
| ENSG00000175745 | NR2F1  | -1.526320837 | 0.0001 |
| ENSG00000185551 | NR2F2  | -1.467219201 | 2E-10  |
| ENSG00000151623 | NR3C2  | -3.130129464 | 2E-22  |
| ENSG00000123358 | NR4A1  | -1.691049246 | 6E-07  |
| ENSG00000148572 | NRBF2  | 1.194709585  | 3E-08  |
| ENSG00000091129 | NRCAM  | -1.249244689 | 0.0053 |
| ENSG00000134986 | NREP   | 1.228229655  | 1E-05  |
| ENSG00000157168 | NRG1   | 1.56760969   | 2E-10  |
| ENSG00000158458 | NRG2   | -1.289651503 | 2E-05  |
| ENSG00000185737 | NRG3   | -3.335585696 | 2E-13  |
| ENSG00000053702 | NRIP2  | -2.486196966 | 5E-12  |
| ENSG00000123572 | NRK    | -1.744791456 | 0.0037 |
| ENSG00000124785 | NRN1   | -1.743316802 | 9E-17  |
| ENSG00000099250 | NRP1   | -1.22031631  | 2E-06  |
| ENSG00000174004 | NRROS  | -1.226031753 | 4E-06  |
| ENSG00000179915 | NRXN1  | -2.592861451 | 8E-15  |
| ENSG00000110076 | NRXN2  | -1.487035732 | 6E-06  |
| ENSG00000021645 | NRXN3  | -1.918836558 | 1E-10  |
| ENSG00000168824 | NSG1   | 2.000001651  | 2E-12  |
| ENSG00000179299 | NSUN7  | -1.693970129 | 2E-06  |
| ENSG00000122643 | NT5C3A | 1.217665436  | 6E-09  |
| ENSG00000182667 | NTM    | -1.734441678 | 2E-08  |
| ENSG00000065320 | NTN1   | -1.257876945 | 0.0007 |
| ENSG00000074527 | NTN4   | -2.263027788 | 9E-24  |
| ENSG00000142233 | NTN5   | -1.641547318 | 7E-06  |
| ENSG00000198400 | NTRK1  | 3.250269563  | 0.0021 |
| ENSG00000148053 | NTRK2  | -1.520817323 | 5E-11  |
| ENSG00000140538 | NTRK3  | -2.861400368 | 1E-20  |
| ENSG00000101188 | NTSR1  | 4.078874303  | 3E-10  |
| ENSG00000163545 | NUAK2  | 2.239767853  | 1E-13  |
| ENSG00000122824 | NUDT10 | -2.176697172 | 0.0007 |
| ENSG00000136159 | NUDT15 | 1.185314818  | 6E-10  |
| ENSG00000198585 | NUDT16 | -1.064116178 | 3E-09  |
| ENSG00000167799 | NUDT8  | 1.889541783  | 8E-12  |
| ENSG00000108559 | NUP88  | 1.020286526  | 9E-08  |
| ENSG00000137804 | NUSAP1 | 1.371736917  | 3E-06  |
| ENSG00000188039 | NWD1   | -2.480415947 | 4E-11  |
| ENSG00000174145 | NWD2   | 2.403169754  | 0.0007 |
| ENSG00000182575 | NXPH3  | -2.597294573 | 3E-07  |
| ENSG00000166924 | NYAP1  | -1.271933535 | 0.0141 |
| ENSG00000089127 | OAS1   | 1.862305651  | 2E-19  |
| ENSG00000111335 | OAS2   | 1.951542455  | 7E-12  |

|                 |         |              |        |
|-----------------|---------|--------------|--------|
| ENSG00000111331 | OAS3    | 1.754949275  | 3E-12  |
| ENSG00000135114 | OASL    | 4.411109027  | 2E-27  |
| ENSG00000122136 | OBP2A   | -2.976405334 | 5E-13  |
| ENSG00000171102 | OBP2B   | -3.079356712 | 5E-13  |
| ENSG00000145247 | OCIAD2  | 1.122400357  | 1E-06  |
| ENSG00000135175 | OCM2    | 3.463986316  | 0.0058 |
| ENSG00000115758 | ODC1    | 1.351373346  | 0.0234 |
| ENSG00000106809 | OGN     | -3.352303327 | 3E-10  |
| ENSG00000104147 | OIP5    | 1.633586067  | 6E-05  |
| ENSG00000183801 | OLFML1  | -2.15041385  | 9E-09  |
| ENSG00000116774 | OLFML3  | -1.862506873 | 4E-09  |
| ENSG00000184221 | OLIG1   | -2.537616323 | 0.0004 |
| ENSG00000173391 | OLR1    | 2.514407177  | 0.0479 |
| ENSG00000127083 | OMD     | -2.460595221 | 0.0002 |
| ENSG00000082556 | OPRK1   | -2.954208782 | 4E-05  |
| ENSG00000171199 | OPRPN   | -2.577551011 | 0.0231 |
| ENSG00000188269 | OR7A5   | -1.72988886  | 0.0307 |
| ENSG00000127530 | OR7C1   | -1.525453165 | 0.0008 |
| ENSG00000186509 | OR9Q1   | -1.955167516 | 0.0408 |
| ENSG00000085840 | ORC1    | 1.618447569  | 1E-07  |
| ENSG00000091651 | ORC6    | 1.164746614  | 0.0004 |
| ENSG00000123353 | ORMDL2  | 1.385693886  | 8E-08  |
| ENSG00000184792 | OSBP2   | 1.339063086  | 5E-14  |
| ENSG00000099985 | OSM     | 3.404432735  | 0.0054 |
| ENSG00000143867 | OSR1    | -3.142552282 | 4E-15  |
| ENSG00000164920 | OSR2    | -2.797142967 | 2E-09  |
| ENSG00000183034 | OTOP2   | 3.086518366  | 9E-09  |
| ENSG00000182938 | OTOP3   | 4.484805595  | 8E-21  |
| ENSG00000167770 | OTUB1   | 1.053975567  | 3E-09  |
| ENSG00000089723 | OTUB2   | 2.675078838  | 1E-20  |
| ENSG00000187950 | OVCH1   | -2.833011075 | 0.0253 |
| ENSG00000183378 | OVCH2   | -2.106205736 | 0.0001 |
| ENSG00000172818 | OVOL1   | 2.289175482  | 5E-12  |
| ENSG00000162881 | OXER1   | -1.184314622 | 0.0025 |
| ENSG00000165621 | OXGR1   | -2.601842652 | 2E-22  |
| ENSG00000101405 | OXT     | -2.163409749 | 0.0171 |
| ENSG00000108405 | P2RX1   | -1.388094168 | 3E-05  |
| ENSG00000099957 | P2RX6   | -2.182480599 | 9E-07  |
| ENSG00000169860 | P2RY1   | 1.610626119  | 2E-19  |
| ENSG00000169313 | P2RY12  | -2.403141422 | 1E-07  |
| ENSG00000175591 | P2RY2   | 2.165621412  | 5E-07  |
| ENSG00000110811 | P3H3    | -1.071309739 | 0.0016 |
| ENSG00000178467 | P4HTM   | -1.281959524 | 2E-09  |
| ENSG00000174740 | PABPC5  | -1.758834097 | 0.0026 |
| ENSG00000124507 | PACSIN1 | -2.480325868 | 4E-05  |
| ENSG00000142623 | PADI1   | 2.616386316  | 4E-11  |
| ENSG00000117115 | PADI2   | -2.705612791 | 2E-16  |
| ENSG00000122133 | PAEP    | -2.160334131 | 0.0015 |



|                 |         |              |        |
|-----------------|---------|--------------|--------|
| ENSG00000077264 | PAK3    | -3.40744265  | 1E-13  |
| ENSG00000107719 | PALD1   | 1.408831283  | 2E-10  |
| ENSG00000099864 | PALM    | -2.654142587 | 3E-20  |
| ENSG00000149090 | PAMR1   | -2.952096475 | 9E-19  |
| ENSG00000110218 | PANX1   | 1.508538293  | 5E-11  |
| ENSG00000116183 | PAPPA2  | -2.038158361 | 6E-05  |
| ENSG00000137819 | PAQR5   | 2.092488497  | 9E-15  |
| ENSG00000182749 | PAQR7   | 1.305367627  | 1E-12  |
| ENSG00000116117 | PARD3B  | -1.475974092 | 8E-05  |
| ENSG00000178184 | PARD6G  | 1.534014072  | 1E-14  |
| ENSG00000169116 | PARM1   | -1.207293489 | 4E-06  |
| ENSG00000138496 | PARP9   | 1.02699628   | 6E-09  |
| ENSG00000185480 | PARPBP  | 1.262458994  | 1E-09  |
| ENSG00000100105 | PATZ1   | -1.413873507 | 3E-16  |
| ENSG00000007372 | PAX6    | -2.055357693 | 0.0008 |
| ENSG00000168078 | PBK     | 1.871965578  | 2E-08  |
| ENSG00000163346 | PBXIP1  | -1.222376012 | 1E-11  |
| ENSG00000173599 | PC      | -1.064838589 | 0.0006 |
| ENSG00000138650 | PCDH10  | -2.276656517 | 0.0036 |
| ENSG00000102290 | PCDH11X | -2.612063858 | 9E-06  |
| ENSG00000189184 | PCDH18  | -1.958323709 | 3E-12  |
| ENSG00000165194 | PCDH19  | -2.09502556  | 2E-06  |
| ENSG00000184226 | PCDH9   | -3.297094363 | 2E-19  |
| ENSG00000250120 | PCDHA10 | -1.934624267 | 0.0101 |
| ENSG00000248383 | PCDHAC1 | -2.136839514 | 0.0314 |
| ENSG00000197479 | PCDHB11 | -1.1160577   | 0.0009 |
| ENSG00000120328 | PCDHB12 | -1.539517127 | 4E-06  |
| ENSG00000113248 | PCDHB15 | -1.220893974 | 7E-05  |
| ENSG00000272674 | PCDHB16 | -1.38033941  | 6E-08  |
| ENSG00000112852 | PCDHB2  | -1.359806948 | 0.0014 |
| ENSG00000113205 | PCDHB3  | -1.401261293 | 0.0097 |
| ENSG00000081818 | PCDHB4  | -1.730089834 | 2E-13  |
| ENSG00000113209 | PCDHB5  | -2.093476731 | 4E-05  |
| ENSG00000113211 | PCDHB6  | -1.477751373 | 0.007  |
| ENSG00000113212 | PCDHB7  | -1.359536757 | 0.0006 |
| ENSG00000120322 | PCDHB8  | -2.71907453  | 0.0032 |
| ENSG00000177839 | PCDHB9  | -1.159434384 | 4E-06  |
| ENSG00000081853 | PCDHGA2 | -1.291768813 | 7E-05  |
| ENSG00000254245 | PCDHGA3 | -2.66964096  | 1E-06  |
| ENSG00000262576 | PCDHGA4 | -2.519352771 | 4E-06  |
| ENSG00000253485 | PCDHGA5 | -1.710517268 | 0.0007 |
| ENSG00000253537 | PCDHGA7 | -1.201847745 | 0.0345 |
| ENSG00000254221 | PCDHGB1 | -1.858578098 | 0.0112 |
| ENSG00000253910 | PCDHGB2 | -1.954476254 | 8E-08  |
| ENSG00000262209 | PCDHGB3 | -1.993960485 | 0.029  |
| ENSG00000253953 | PCDHGB4 | -1.069677706 | 0.0316 |
| ENSG00000240764 | PCDHGC5 | 1.901198763  | 0.0291 |
| ENSG00000124253 | PCK1    | -5.360217784 | 3E-14  |



|                 |          |              |        |
|-----------------|----------|--------------|--------|
| ENSG00000166803 | PCLAF    | 1.171340736  | 0.0009 |
| ENSG00000186472 | PCLO     | -1.756315362 | 3E-07  |
| ENSG00000132646 | PCNA     | 1.135216792  | 2E-06  |
| ENSG00000163710 | PCOLCE2  | -3.739196228 | 3E-25  |
| ENSG00000174788 | PCP2     | -1.851753596 | 0.0007 |
| ENSG00000183036 | PCP4     | -2.243495342 | 2E-05  |
| ENSG00000248485 | PCP4L1   | 1.239297113  | 0.0006 |
| ENSG00000175426 | PCSK1    | 1.804295919  | 0.0162 |
| ENSG00000099139 | PCSK5    | -1.526786355 | 2E-08  |
| ENSG00000140479 | PCSK6    | 1.9992362    | 2E-12  |
| ENSG00000169174 | PCSK9    | 2.458406277  | 3E-22  |
| ENSG00000197646 | PDCD1LG2 | -1.034945469 | 0.0047 |
| ENSG00000163440 | PDCL2    | 3.005446837  | 0.0007 |
| ENSG00000128655 | PDE11A   | -3.434537894 | 1E-15  |
| ENSG00000115252 | PDE1A    | -1.334904228 | 7E-06  |
| ENSG00000123360 | PDE1B    | -1.384753109 | 9E-15  |
| ENSG00000154678 | PDE1C    | -1.379291527 | 0.0037 |
| ENSG00000186642 | PDE2A    | -1.674923015 | 1E-11  |
| ENSG00000172572 | PDE3A    | -1.176885326 | 0.0007 |
| ENSG00000152270 | PDE3B    | -3.06931878  | 1E-17  |
| ENSG00000065989 | PDE4A    | -1.184501112 | 2E-07  |
| ENSG00000178104 | PDE4DIP  | -1.194153674 | 2E-16  |
| ENSG00000138735 | PDE5A    | -1.899070759 | 8E-22  |
| ENSG00000113231 | PDE8B    | -2.671775168 | 5E-12  |
| ENSG00000160191 | PDE9A    | -2.591615746 | 6E-18  |
| ENSG00000100311 | PDGFB    | -1.189585921 | 3E-06  |
| ENSG00000170962 | PDGFD    | -2.549510529 | 1E-14  |
| ENSG00000134853 | PDGFRA   | -1.692050693 | 6E-09  |
| ENSG00000113721 | PDGFRB   | -1.300456252 | 8E-05  |
| ENSG00000104213 | PDGFRL   | -2.624879337 | 6E-12  |
| ENSG00000004799 | PDK4     | -2.974924743 | 7E-29  |
| ENSG00000154553 | PDLIM3   | -2.068698286 | 1E-17  |
| ENSG00000131435 | PDLIM4   | -1.017562428 | 9E-06  |
| ENSG00000162493 | PDPN     | 1.011600199  | 0.0018 |
| ENSG00000148459 | PDSS1    | 1.483264789  | 7E-05  |
| ENSG00000172367 | PDZD3    | -1.598855806 | 0.0472 |
| ENSG00000067840 | PDZD4    | -1.068839338 | 0.0002 |
| ENSG00000162366 | PDZK1IP1 | 2.599272647  | 7E-13  |
| ENSG00000121440 | PDZRN3   | -1.966286232 | 4E-11  |
| ENSG00000165966 | PDZRN4   | -2.319745652 | 3E-06  |
| ENSG00000187800 | PEAR1    | -1.059607826 | 0.0001 |
| ENSG00000134020 | PEBP4    | -2.243548245 | 0.0114 |
| ENSG00000261371 | PECAM1   | -1.203873113 | 4E-08  |
| ENSG00000115425 | PECR     | -1.598581527 | 1E-09  |
| ENSG00000242265 | PEG10    | -2.04693735  | 4E-22  |
| ENSG00000198300 | PEG3     | -2.268039731 | 6E-16  |
| ENSG00000139946 | PELI2    | -1.835500524 | 2E-10  |
| ENSG00000181195 | PENK     | -1.749707107 | 0.0011 |

|                 |         |              |        |
|-----------------|---------|--------------|--------|
| ENSG00000179094 | PER1    | -1.081542015 | 4E-08  |
| ENSG00000187642 | PERM1   | -2.240582249 | 2E-06  |
| ENSG00000112378 | PERP    | 1.922443006  | 2E-14  |
| ENSG00000166821 | PEX11A  | -1.320707338 | 2E-06  |
| ENSG00000163737 | PF4     | -2.483283224 | 0.0069 |
| ENSG00000158571 | PFKFB1  | -2.466098581 | 3E-11  |
| ENSG00000123836 | PFKFB2  | 1.187672825  | 2E-12  |
| ENSG00000114268 | PFKFB4  | 1.537005877  | 6E-09  |
| ENSG00000108518 | PFN1    | 1.186518745  | 3E-07  |
| ENSG00000171314 | PGAM1   | 1.444493468  | 9E-07  |
| ENSG00000164708 | PGAM2   | -3.778231282 | 7E-05  |
| ENSG00000247077 | PGAM5   | 1.30443741   | 9E-09  |
| ENSG00000177614 | PGBD5   | 1.93329041   | 2E-05  |
| ENSG00000119630 | PGF     | 1.900477754  | 1E-09  |
| ENSG00000161031 | PGLYRP2 | 3.990865758  | 2E-06  |
| ENSG00000159527 | PGLYRP3 | 1.578452584  | 1E-07  |
| ENSG00000163218 | PGLYRP4 | 1.491681098  | 4E-07  |
| ENSG00000169299 | PGM2    | 2.032360527  | 3E-20  |
| ENSG00000154330 | PGM5    | -2.104299051 | 7E-15  |
| ENSG00000130517 | PGPEP1  | -1.602261739 | 2E-11  |
| ENSG00000082175 | PGR     | -2.872041124 | 8E-16  |
| ENSG00000087495 | PHACTR3 | -2.050144265 | 2E-05  |
| ENSG00000198324 | PHETA1  | 1.364289248  | 2E-11  |
| ENSG00000102174 | PHEX    | 1.367007938  | 0.006  |
| ENSG00000112511 | PHF1    | -1.253496899 | 7E-24  |
| ENSG00000164776 | PHKG1   | -2.154143157 | 3E-14  |
| ENSG00000181649 | PHLDA2  | 2.04063542   | 1E-06  |
| ENSG00000019144 | PHLDB1  | -1.542927341 | 2E-15  |
| ENSG00000107537 | PHYH    | -1.20366617  | 3E-11  |
| ENSG00000175287 | PHYHD1  | -1.167541531 | 2E-08  |
| ENSG00000168490 | PHYHIP  | -2.988997117 | 1E-22  |
| ENSG00000165443 | PHYHIPL | -2.340475992 | 4E-05  |
| ENSG00000137558 | PI15    | 1.195901018  | 0.0067 |
| ENSG00000164530 | PI16    | -2.489019265 | 1E-08  |
| ENSG00000124102 | PI3     | 8.554949711  | 6E-20  |
| ENSG00000153823 | PID1    | -1.609079495 | 3E-11  |
| ENSG00000154864 | PIEZO2  | -1.657760282 | 0.0002 |
| ENSG00000140451 | PIF1    | 1.208037367  | 0.0013 |
| ENSG00000173947 | PIFO    | -2.043101433 | 6E-11  |
| ENSG00000165195 | PIGA    | 1.11422794   | 3E-10  |
| ENSG00000162896 | PIGR    | -3.052569661 | 5E-12  |
| ENSG00000155629 | PIK3AP1 | -1.647476678 | 3E-08  |
| ENSG00000171608 | PIK3CD  | 1.201648679  | 1E-05  |
| ENSG00000145675 | PIK3R1  | -1.173390471 | 4E-10  |
| ENSG00000105647 | PIK3R2  | 1.56720759   | 0.0039 |
| ENSG00000117461 | PIK3R3  | -1.222067865 | 2E-11  |
| ENSG00000276231 | PIK3R6  | -1.036986043 | 0.002  |
| ENSG00000137193 | PIM1    | 1.796494802  | 3E-12  |

|                 |         |              |        |
|-----------------|---------|--------------|--------|
| ENSG00000129195 | PIMREG  | 1.128276899  | 0.004  |
| ENSG00000159763 | PIP     | -5.506315325 | 9E-20  |
| ENSG00000107242 | PIP5K1B | -3.011370189 | 4E-33  |
| ENSG00000167103 | PIP5KL1 | 1.370705874  | 8E-09  |
| ENSG00000179761 | PIPOX   | -1.704195827 | 0.0012 |
| ENSG00000069011 | PITX1   | 3.793107413  | 7E-29  |
| ENSG00000197181 | PIWIL2  | -2.731888305 | 3E-05  |
| ENSG00000008710 | PKD1    | -1.035416017 | 0.0001 |
| ENSG00000166473 | PKD1L2  | -1.952665733 | 1E-05  |
| ENSG00000277481 | PKD1L3  | -2.231238534 | 0.0107 |
| ENSG00000162878 | PKDCC   | -2.954681515 | 2E-17  |
| ENSG00000170927 | PKHD1   | -2.171467898 | 0.0001 |
| ENSG00000205038 | PKHD1L1 | -1.281602757 | 0.0277 |
| ENSG00000067225 | PKM     | 1.278606112  | 1E-07  |
| ENSG00000127564 | PKMYT1  | 2.058840717  | 3E-05  |
| ENSG00000123143 | PKN1    | -1.538922654 | 3E-13  |
| ENSG00000081277 | PKP1    | 2.201963847  | 4E-14  |
| ENSG00000184363 | PKP3    | 2.117641441  | 3E-13  |
| ENSG00000176485 | PLA2G16 | -3.081109331 | 9E-32  |
| ENSG00000188257 | PLA2G2A | -2.244394236 | 5E-09  |
| ENSG00000158786 | PLA2G2F | 1.948678398  | 2E-07  |
| ENSG00000100078 | PLA2G3  | 2.564869822  | 1E-20  |
| ENSG00000105499 | PLA2G4C | -1.330618542 | 3E-06  |
| ENSG00000159337 | PLA2G4D | 4.005332032  | 1E-48  |
| ENSG00000188089 | PLA2G4E | 1.847342348  | 4E-13  |
| ENSG00000127472 | PLA2G5  | -2.175803272 | 3E-06  |
| ENSG00000153246 | PLA2R1  | -1.495041793 | 2E-12  |
| ENSG00000170965 | PLAC1   | 3.504977025  | 7E-05  |
| ENSG00000189129 | PLAC9   | -2.257431113 | 9E-12  |
| ENSG00000104368 | PLAT    | -1.351724755 | 1E-10  |
| ENSG00000122861 | PLAU    | 2.160754643  | 1E-18  |
| ENSG00000121316 | PLBD1   | 2.264201847  | 1E-21  |
| ENSG00000182621 | PLCB1   | -1.576730493 | 1E-07  |
| ENSG00000149782 | PLCB3   | 1.289107401  | 4E-10  |
| ENSG00000101333 | PLCB4   | -2.839936983 | 1E-18  |
| ENSG00000115556 | PLCD4   | 1.773529201  | 4E-20  |
| ENSG00000138193 | PLCE1   | -2.589706407 | 2E-14  |
| ENSG00000114805 | PLCH1   | -1.86644177  | 0.0006 |
| ENSG00000115896 | PLCL1   | -1.885247781 | 3E-07  |
| ENSG00000154822 | PLCL2   | -2.174635285 | 9E-10  |
| ENSG00000182378 | PLCXD1  | 1.736955826  | 8E-25  |
| ENSG00000240891 | PLCXD2  | 1.395327094  | 0.0134 |
| ENSG00000182836 | PLCXD3  | -2.76947551  | 1E-05  |
| ENSG00000129219 | PLD2    | 1.140391151  | 2E-11  |
| ENSG00000179598 | PLD6    | -1.23980045  | 8E-06  |
| ENSG00000100558 | PLEK2   | 1.816531855  | 6E-07  |
| ENSG00000143850 | PLEKHA6 | -2.617237951 | 4E-13  |
| ENSG00000021300 | PLEKHB1 | -2.908271329 | 9E-24  |

|                 |          |              |        |
|-----------------|----------|--------------|--------|
| ENSG00000175985 | PLEKHD1  | -2.362747114 | 1E-11  |
| ENSG00000054690 | PLEKHH1  | -1.052954567 | 0.0002 |
| ENSG00000148735 | PLEKHS1  | -1.766488492 | 3E-06  |
| ENSG00000166819 | PLIN1    | -5.314425515 | 2E-19  |
| ENSG00000105355 | PLIN3    | 1.51281203   | 6E-14  |
| ENSG00000167676 | PLIN4    | -4.769054697 | 5E-17  |
| ENSG00000214456 | PLIN5    | -1.462658578 | 3E-08  |
| ENSG00000166851 | PLK1     | 1.864773909  | 1E-07  |
| ENSG00000145632 | PLK2     | 1.137098588  | 1E-05  |
| ENSG00000142731 | PLK4     | 1.223106478  | 6E-09  |
| ENSG00000198523 | PLN      | -2.330864903 | 5E-13  |
| ENSG00000102007 | PLP2     | 1.258190578  | 1E-07  |
| ENSG00000067113 | PLPP1    | -1.028830123 | 3E-07  |
| ENSG00000162407 | PLPP3    | -1.697398777 | 2E-07  |
| ENSG00000160539 | PLPP7    | -2.106810262 | 1E-06  |
| ENSG00000148123 | PLPPR1   | -2.801077447 | 0.0015 |
| ENSG00000114698 | PLSCR4   | -1.611183894 | 5E-09  |
| ENSG00000130827 | PLXNA3   | -1.260961087 | 2E-05  |
| ENSG00000221866 | PLXNA4   | -2.436395952 | 2E-20  |
| ENSG00000004399 | PLXND1   | -1.079549289 | 3E-06  |
| ENSG00000185664 | PMEL     | 1.831414037  | 1E-08  |
| ENSG00000109099 | PMP22    | -1.289987488 | 6E-13  |
| ENSG00000130822 | PNCK     | -1.812913175 | 4E-05  |
| ENSG00000132424 | PNISR    | -1.230579787 | 0.0004 |
| ENSG00000183837 | PNMA3    | -2.114645531 | 0.0066 |
| ENSG00000182013 | PNMA8A   | -1.356168216 | 3E-06  |
| ENSG00000204851 | PNMA8B   | -1.703265957 | 1E-09  |
| ENSG00000141744 | PNMT     | -3.007262275 | 0.0046 |
| ENSG00000198805 | PNP      | 1.93583661   | 3E-09  |
| ENSG00000180316 | PNPLA1   | 2.057839468  | 1E-10  |
| ENSG00000177666 | PNPLA2   | -1.58940838  | 3E-09  |
| ENSG00000130653 | PNPLA7   | -1.629075358 | 3E-06  |
| ENSG00000164087 | POC1A    | 1.525766131  | 0.0003 |
| ENSG00000174348 | PODN     | -2.36914935  | 4E-12  |
| ENSG00000132000 | PODNL1   | 1.287572938  | 2E-05  |
| ENSG00000124429 | POF1B    | 2.461281771  | 4E-13  |
| ENSG00000070501 | POLB     | 1.204041842  | 3E-07  |
| ENSG00000100479 | POLE2    | 1.30983534   | 3E-08  |
| ENSG00000113356 | POLR3G   | 2.219438366  | 2E-10  |
| ENSG00000115138 | POMC     | 1.420924269  | 0.0249 |
| ENSG00000121577 | POPC2    | -1.439086299 | 3E-06  |
| ENSG00000028277 | POU2F2   | -1.30942256  | 8E-10  |
| ENSG00000198914 | POU3F3   | -2.805511168 | 3E-09  |
| ENSG00000184271 | POU6F1   | -1.620005673 | 4E-12  |
| ENSG00000112033 | PPARD    | 1.569263748  | 1E-13  |
| ENSG00000132170 | PPARG    | -1.719068088 | 9E-09  |
| ENSG00000109819 | PPARGC1A | -3.043821353 | 7E-22  |
| ENSG00000163736 | PPBP     | -1.737399215 | 0.0009 |

|                 |          |              |        |
|-----------------|----------|--------------|--------|
| ENSG00000168333 | PPDPFL   | -4.037666869 | 5E-06  |
| ENSG00000139220 | PPFIA2   | -1.448761411 | 0.0018 |
| ENSG00000143847 | PPFIA4   | 1.415827617  | 0.0041 |
| ENSG00000196262 | PPIA     | 1.113709588  | 1E-09  |
| ENSG00000108179 | PPIF     | 1.72675422   | 8E-07  |
| ENSG00000137168 | PPIL1    | 1.108669065  | 5E-06  |
| ENSG00000185250 | PPIL6    | -1.026898438 | 6E-05  |
| ENSG00000111110 | PPM1H    | -1.722672924 | 3E-09  |
| ENSG00000163644 | PPM1K    | -1.500494691 | 5E-07  |
| ENSG00000164088 | PPM1M    | -1.150103939 | 6E-13  |
| ENSG00000172531 | PPP1CA   | 1.191315782  | 2E-07  |
| ENSG00000077157 | PPP1R12B | -1.525734072 | 4E-11  |
| ENSG00000167641 | PPP1R14A | -2.409064734 | 3E-20  |
| ENSG00000198729 | PPP1R14C | 1.983193855  | 7E-09  |
| ENSG00000101445 | PPP1R16B | -1.536254355 | 1E-09  |
| ENSG00000135447 | PPP1R1A  | -4.349365007 | 8E-23  |
| ENSG00000131771 | PPP1R1B  | -3.333196801 | 8E-24  |
| ENSG00000162148 | PPP1R32  | -1.153824082 | 8E-05  |
| ENSG00000219607 | PPP1R3G  | -1.928314486 | 1E-07  |
| ENSG00000158528 | PPP1R9A  | -3.029120082 | 8E-19  |
| ENSG00000074211 | PPP2R2C  | 1.855102815  | 3E-24  |
| ENSG00000073711 | PPP2R3A  | 1.117603924  | 4E-13  |
| ENSG00000149923 | PPP4C    | 1.1015939    | 3E-07  |
| ENSG00000154845 | PPP4R1   | 1.600036222  | 3E-11  |
| ENSG00000119698 | PPP4R4   | 2.551154618  | 2E-05  |
| ENSG00000230510 | PPP5D1   | -1.717653733 | 1E-06  |
| ENSG00000221988 | PPT2     | 1.093467844  | 0.0004 |
| ENSG00000174899 | PQLC2L   | -2.52349315  | 3E-06  |
| ENSG00000275342 | PRAG1    | 1.339842083  | 8E-08  |
| ENSG00000133246 | PRAM1    | -1.61808691  | 8E-06  |
| ENSG00000251655 | PRB1     | -2.851652847 | 0.0027 |
| ENSG00000121335 | PRB2     | -4.205677296 | 8E-07  |
| ENSG00000197870 | PRB3     | -2.502832223 | 0.0016 |
| ENSG00000230657 | PRB4     | -3.564470869 | 2E-07  |
| ENSG00000214140 | PRCD     | -2.625069599 | 3E-12  |
| ENSG00000057657 | PRDM1    | 2.335236891  | 4E-29  |
| ENSG00000142611 | PRDM16   | -1.881958455 | 1E-07  |
| ENSG00000126856 | PRDM7    | 3.020995553  | 0.0014 |
| ENSG00000152784 | PRDM8    | -1.646881904 | 0.0007 |
| ENSG00000117450 | PRDX1    | 1.02433457   | 3E-08  |
| ENSG00000169230 | PRELID1  | 1.712631094  | 7E-10  |
| ENSG00000101166 | PRELID3B | 1.016523949  | 4E-05  |
| ENSG00000188783 | PRELP    | -3.107464709 | 2E-23  |
| ENSG00000116690 | PRG4     | -2.80859162  | 2E-06  |
| ENSG00000139174 | PRICKLE1 | -1.454287615 | 4E-12  |
| ENSG00000175785 | PRIMA1   | -1.174919627 | 4E-07  |
| ENSG00000162409 | PRKAA2   | -2.509542293 | 2E-22  |
| ENSG00000005249 | PRKAR2B  | -3.348587561 | 2E-29  |

|                 |        |              |        |
|-----------------|--------|--------------|--------|
| ENSG00000166501 | PRKCB  | -1.336678244 | 1E-10  |
| ENSG00000065675 | PRKCQ  | 2.936116387  | 1E-16  |
| ENSG00000184304 | PRKD1  | -1.871877453 | 4E-07  |
| ENSG00000185532 | PRKG1  | -1.463001636 | 3E-06  |
| ENSG00000138669 | PRKG2  | -1.606474862 | 6E-06  |
| ENSG00000185345 | PRKN   | -1.60270667  | 4E-09  |
| ENSG00000185238 | PRMT3  | 1.050802809  | 2E-05  |
| ENSG00000228672 | PROB1  | 2.355563848  | 1E-12  |
| ENSG00000115718 | PROC   | 1.62186551   | 0.0089 |
| ENSG00000167525 | PROCA1 | -1.237486753 | 0.0004 |
| ENSG00000100033 | PRODH  | -1.780804836 | 0.0024 |
| ENSG00000143125 | PROK1  | -3.476859059 | 8E-05  |
| ENSG00000007062 | PROM1  | -2.000376849 | 5E-17  |
| ENSG00000155066 | PROM2  | 1.152075926  | 4E-09  |
| ENSG00000135406 | PRPH   | -1.911816639 | 5E-06  |
| ENSG00000068489 | PRR11  | 1.506586796  | 2E-08  |
| ENSG00000167183 | PRR15L | -3.180321816 | 1E-19  |
| ENSG00000180525 | PRR26  | -1.638590941 | 0.0043 |
| ENSG00000224383 | PRR29  | -1.31182594  | 0.0246 |
| ENSG00000111215 | PRR4   | -2.715240638 | 0.0006 |
| ENSG00000203783 | PRR9   | 7.00983877   | 2E-09  |
| ENSG00000130032 | PRRG3  | -2.346240458 | 2E-08  |
| ENSG00000135378 | PRRG4  | 1.399520907  | 2E-14  |
| ENSG00000204314 | PRRT1  | -1.362476365 | 1E-06  |
| ENSG00000167371 | PRRT2  | -1.652888216 | 0.0001 |
| ENSG00000116132 | PRRX1  | -1.023160473 | 0.0031 |
| ENSG00000005001 | PRSS22 | 1.663410681  | 1E-05  |
| ENSG00000172382 | PRSS27 | 2.599785792  | 8E-17  |
| ENSG00000010438 | PRSS3  | 3.918991286  | 3E-14  |
| ENSG00000178226 | PRSS36 | 1.026739226  | 0.014  |
| ENSG00000151006 | PRSS53 | 1.073221574  | 0.0221 |
| ENSG00000052344 | PRSS8  | 1.824900103  | 4E-09  |
| ENSG00000106772 | PRUNE2 | -1.916634863 | 2E-13  |
| ENSG00000105227 | PRX    | -1.461222359 | 3E-08  |
| ENSG00000178597 | PSAPL1 | 1.474086252  | 0.015  |
| ENSG00000135069 | PSAT1  | 1.233806038  | 9E-11  |
| ENSG00000146005 | PSD2   | -2.815969359 | 0.0429 |
| ENSG00000243137 | PSG4   | 1.393080603  | 0.0083 |
| ENSG00000221878 | PSG7   | 1.956281392  | 0.0217 |
| ENSG00000143106 | PSMA5  | 1.051930326  | 4E-06  |
| ENSG00000126067 | PSMB2  | 1.001783423  | 4E-09  |
| ENSG00000100804 | PSMB5  | 1.016739348  | 1E-06  |
| ENSG00000142507 | PSMB6  | 1.053405061  | 4E-06  |
| ENSG00000165916 | PSMC3  | 1.059602531  | 2E-08  |
| ENSG00000013275 | PSMC4  | 1.099071766  | 5E-09  |
| ENSG00000108671 | PSMD11 | 1.045458788  | 6E-14  |
| ENSG00000115233 | PSMD14 | 1.200838068  | 2E-09  |
| ENSG00000131467 | PSME3  | 1.097212368  | 3E-06  |

|                 |          |              |        |
|-----------------|----------|--------------|--------|
| ENSG00000183527 | PSMG1    | 1.013490648  | 9E-07  |
| ENSG00000157778 | PSMG3    | 1.010247777  | 2E-06  |
| ENSG00000204538 | PSORS1C2 | 2.310554093  | 0.0002 |
| ENSG00000146733 | PSPH     | 1.312504789  | 0.0003 |
| ENSG00000169403 | PTAFR    | 1.250701496  | 1E-06  |
| ENSG00000119314 | PTBP3    | 1.184679745  | 5E-11  |
| ENSG00000185920 | PTCH1    | -1.451471109 | 3E-09  |
| ENSG00000117425 | PTCH2    | -1.668863854 | 5E-08  |
| ENSG00000165186 | PTCHD1   | -3.359720498 | 1E-10  |
| ENSG00000168229 | PTGDR    | -2.505076362 | 0.0006 |
| ENSG00000125384 | PTGER2   | -1.601618199 | 4E-05  |
| ENSG00000171522 | PTGER4   | -1.066547947 | 7E-09  |
| ENSG00000122420 | PTGFR    | -2.360708403 | 5E-12  |
| ENSG00000124212 | PTGIS    | -3.083223031 | 2E-13  |
| ENSG00000095303 | PTGS1    | 1.620348663  | 3E-09  |
| ENSG00000073756 | PTGS2    | 2.621034587  | 2E-05  |
| ENSG00000160801 | PTH1R    | -2.02791701  | 7E-10  |
| ENSG00000144407 | PTH2R    | -2.331004541 | 0.0248 |
| ENSG00000087494 | PTHLH    | 2.555690569  | 1E-05  |
| ENSG00000101213 | PTK6     | 1.114726629  | 3E-06  |
| ENSG00000112245 | PTP4A1   | 1.107729893  | 2E-07  |
| ENSG00000184489 | PTP4A3   | -1.052351475 | 0.0002 |
| ENSG00000127329 | PTPRB    | -1.09649195  | 4E-06  |
| ENSG00000149177 | PTPRJ    | -1.377242308 | 1E-06  |
| ENSG00000173482 | PTPRM    | -1.432338402 | 7E-14  |
| ENSG00000139304 | PTPRQ    | -2.777748949 | 0.0008 |
| ENSG00000105426 | PTPRS    | -1.291365033 | 9E-09  |
| ENSG00000196090 | PTPRT    | -2.813640353 | 2E-14  |
| ENSG00000060656 | PTPRU    | -1.376160438 | 3E-14  |
| ENSG00000106278 | PTPRZ1   | 1.499736576  | 8E-13  |
| ENSG00000150787 | PTS      | 1.119759656  | 7E-08  |
| ENSG00000164611 | PTTG1    | 2.112011549  | 1E-11  |
| ENSG00000130021 | PUDP     | 1.206592689  | 3E-06  |
| ENSG00000169972 | PUSL1    | 1.340928083  | 5E-07  |
| ENSG00000168994 | PXDC1    | -1.003000506 | 6E-11  |
| ENSG00000147485 | PXDNL    | 1.579990532  | 0.0318 |
| ENSG00000103490 | PYCARD   | 2.077464658  | 6E-15  |
| ENSG00000169900 | PYDC1    | 4.094591282  | 2E-10  |
| ENSG00000100994 | PYGB     | -1.180766216 | 1E-09  |
| ENSG00000068976 | PYGM     | -1.808978421 | 6E-08  |
| ENSG00000163564 | PYHIN1   | -1.913807093 | 2E-05  |
| ENSG00000119943 | PYROXD2  | -2.104818378 | 2E-06  |
| ENSG00000186867 | QRFPR    | 6.259830938  | 2E-11  |
| ENSG00000129646 | QRICH2   | -1.100591723 | 1E-05  |
| ENSG00000116260 | QSOX1    | 1.038888044  | 5E-06  |
| ENSG00000084733 | RAB10    | 1.418220581  | 2E-09  |
| ENSG00000103769 | RAB11A   | 1.00154798   | 6E-07  |
| ENSG00000146955 | RAB19    | -2.067460463 | 0.0326 |

|                 |            |              |        |
|-----------------|------------|--------------|--------|
| ENSG00000169228 | RAB24      | 1.278477756  | 8E-06  |
| ENSG00000132698 | RAB25      | 1.972591706  | 2E-12  |
| ENSG00000167964 | RAB26      | -1.265894339 | 0.0094 |
| ENSG00000041353 | RAB27B     | 1.23456355   | 2E-11  |
| ENSG00000168461 | RAB31      | 1.559179612  | 6E-13  |
| ENSG00000123892 | RAB38      | 2.280926963  | 1E-12  |
| ENSG00000179331 | RAB39A     | -2.615525259 | 0.0144 |
| ENSG00000169213 | RAB3B      | -2.332099434 | 2E-15  |
| ENSG00000152932 | RAB3C      | -1.697292066 | 0.0019 |
| ENSG00000105514 | RAB3D      | 1.510346226  | 1E-09  |
| ENSG00000167994 | RAB3IL1    | -2.09858758  | 3E-13  |
| ENSG00000144566 | RAB5A      | 1.006586607  | 1E-06  |
| ENSG00000101084 | RAB5IF     | 1.126932561  | 0.0026 |
| ENSG00000154917 | RAB6B      | -1.674832262 | 3E-11  |
| ENSG00000123570 | RAB9B      | -1.732955584 | 9E-06  |
| ENSG00000154710 | RABGEF1    | 1.297829343  | 7E-09  |
| ENSG00000183155 | RABIF      | 1.458807277  | 9E-11  |
| ENSG00000144134 | RABL2A     | -1.151873476 | 4E-07  |
| ENSG00000161800 | RACGAP1    | 1.248206654  | 5E-13  |
| ENSG00000085999 | RAD54L     | 1.289908302  | 1E-05  |
| ENSG00000157927 | RADIL      | -1.837630088 | 2E-05  |
| ENSG00000164520 | RAET1E     | 2.014606365  | 3E-12  |
| ENSG00000203722 | RAET1G     | 2.584582464  | 2E-19  |
| ENSG00000155918 | RAET1L     | 3.040002576  | 9E-12  |
| ENSG00000039560 | RAI14      | -1.017765661 | 0.0003 |
| ENSG00000131831 | RAI2       | -2.657800487 | 8E-23  |
| ENSG00000116191 | RALGPS2    | 1.645462112  | 1E-21  |
| ENSG00000131477 | RAMP2      | -1.082863102 | 1E-07  |
| ENSG00000132341 | RAN        | 1.49690196   | 2E-09  |
| ENSG00000204764 | RANBP17    | -1.248731917 | 0.0011 |
| ENSG00000164188 | RANBP3L    | -3.167659696 | 7E-07  |
| ENSG00000181467 | RAP2B      | 1.202622626  | 4E-08  |
| ENSG00000079337 | RAPGEF3    | -1.295838191 | 2E-06  |
| ENSG00000077092 | RARB       | -1.928896654 | 6E-06  |
| ENSG00000106538 | RARRES2    | -2.676683219 | 2E-24  |
| ENSG00000133321 | RARRES3    | -1.385167581 | 3E-08  |
| ENSG00000185989 | RASA3      | -1.652485919 | 2E-11  |
| ENSG00000108551 | RASD1      | -1.928774124 | 8E-11  |
| ENSG00000100302 | RASD2      | -2.182688631 | 5E-12  |
| ENSG00000146090 | RASGEF1C   | -2.199088097 | 0.0005 |
| ENSG00000113319 | RASGRF2    | -1.458545922 | 3E-08  |
| ENSG00000172575 | RASGRP1    | 1.611274094  | 7E-11  |
| ENSG00000152689 | RASGRP3    | -1.009894586 | 0.0002 |
| ENSG00000100276 | RASL10A    | -1.092054182 | 0.0196 |
| ENSG00000270885 | RASL10B    | -1.937994208 | 0.0018 |
| ENSG00000103710 | RASL12     | -1.771752941 | 9E-16  |
| ENSG00000107551 | RASSF4     | -1.507686191 | 3E-13  |
| ENSG00000248643 | RBM14-RBM4 | 2.790066762  | 0.0125 |



|                 |         |              |        |
|-----------------|---------|--------------|--------|
| ENSG00000203867 | RBM20   | -2.081118902 | 3E-10  |
| ENSG00000112183 | RBM24   | -1.39532584  | 0.0043 |
| ENSG00000144642 | RBMS3   | -2.053879543 | 6E-18  |
| ENSG00000114115 | RBP1    | 1.590561562  | 1E-08  |
| ENSG00000138207 | RBP4    | -5.21216221  | 5E-14  |
| ENSG00000139194 | RBP5    | -1.491556883 | 0.0049 |
| ENSG00000157110 | RBPMS   | -1.366672508 | 8E-12  |
| ENSG00000166831 | RBPMS2  | -2.318985686 | 1E-22  |
| ENSG00000172348 | RCAN2   | -2.579655956 | 1E-19  |
| ENSG00000180198 | RCC1    | 1.217479143  | 3E-10  |
| ENSG00000167771 | RCOR2   | -1.109755619 | 0.0054 |
| ENSG00000198771 | RCSD1   | -1.367990071 | 6E-06  |
| ENSG00000139988 | RDH12   | 3.328567953  | 2E-16  |
| ENSG00000139547 | RDH16   | 3.38353885   | 4E-19  |
| ENSG00000135437 | RDH5    | -1.810811363 | 2E-07  |
| ENSG00000122707 | RECK    | -1.833426272 | 2E-10  |
| ENSG00000250673 | REELD1  | -2.65526402  | 1E-06  |
| ENSG00000132563 | REEP2   | -1.864055406 | 5E-06  |
| ENSG00000164620 | RELL2   | 1.360186236  | 2E-08  |
| ENSG00000189056 | RELN    | -2.581487306 | 5E-09  |
| ENSG00000054967 | RELT    | 1.064407846  | 8E-05  |
| ENSG00000088320 | REM1    | -1.640949367 | 8E-07  |
| ENSG00000143839 | REN     | 4.304120456  | 7E-07  |
| ENSG00000102032 | RENBP   | -1.291889914 | 1E-06  |
| ENSG00000169891 | REPS2   | -1.283452068 | 2E-06  |
| ENSG00000134533 | RERG    | -1.441365735 | 2E-06  |
| ENSG00000111404 | RERGL   | -3.006044701 | 3E-11  |
| ENSG00000154153 | RETREG1 | -1.544199766 | 7E-09  |
| ENSG00000162944 | RFTN2   | -1.299032965 | 0.0004 |
| ENSG00000102760 | RGCC    | -1.446704618 | 3E-11  |
| ENSG00000205517 | RGL3    | -2.279350439 | 2E-07  |
| ENSG00000182175 | RGMA    | -1.528672391 | 9E-21  |
| ENSG00000130988 | RGN     | -2.252183781 | 2E-08  |
| ENSG00000169220 | RGS14   | 1.432972008  | 2E-10  |
| ENSG00000147509 | RGS20   | 3.610718874  | 5E-21  |
| ENSG00000132554 | RGS22   | -2.630414133 | 7E-09  |
| ENSG00000143248 | RGS5    | -1.010089229 | 0.0006 |
| ENSG00000182732 | RGS6    | -3.989754354 | 9E-19  |
| ENSG00000186479 | RGS7BP  | -2.949256061 | 9E-11  |
| ENSG00000108370 | RGS9    | -2.46794252  | 6E-19  |
| ENSG00000132677 | RHBG    | 1.524695842  | 0.0002 |
| ENSG00000263961 | RHEX    | -1.772965104 | 0.0001 |
| ENSG00000164292 | RHOBTB3 | -1.790885223 | 7E-15  |
| ENSG00000173156 | RHOD    | 2.517647466  | 2E-16  |
| ENSG00000116574 | RHOU    | -1.571082234 | 1E-12  |
| ENSG00000101883 | RHOXF1  | -2.691282633 | 0.0029 |
| ENSG00000131941 | RHPN2   | -3.299857019 | 2E-26  |
| ENSG00000079841 | RIMS1   | -4.218430573 | 9E-17  |

|                 |         |              |        |
|-----------------|---------|--------------|--------|
| ENSG00000117016 | RIMS3   | 1.6716537    | 2E-06  |
| ENSG00000101098 | RIMS4   | -3.01610373  | 3E-05  |
| ENSG00000111913 | RIPOR2  | -1.381719259 | 1E-05  |
| ENSG00000042062 | RIPOR3  | 1.124435981  | 0.0005 |
| ENSG00000129538 | RNASE1  | -1.45633744  | 6E-09  |
| ENSG00000165799 | RNASE7  | 2.494941745  | 3E-16  |
| ENSG00000026297 | RNASET2 | -1.160562338 | 1E-10  |
| ENSG00000128482 | RNF112  | -2.14210737  | 1E-09  |
| ENSG00000113269 | RNF130  | -1.45825802  | 4E-21  |
| ENSG00000163162 | RNF149  | 1.411600335  | 2E-32  |
| ENSG00000170153 | RNF150  | -3.16898167  | 2E-30  |
| ENSG00000176641 | RNF152  | -1.552257713 | 2E-09  |
| ENSG00000141576 | RNF157  | -2.07554865  | 9E-14  |
| ENSG00000141622 | RNF165  | -1.694729244 | 0.0002 |
| ENSG00000145428 | RNF175  | -2.645476417 | 4E-05  |
| ENSG00000180537 | RNF182  | -1.467634788 | 0.0017 |
| ENSG00000178222 | RNF212  | -1.313258097 | 0.0002 |
| ENSG00000189051 | RNF222  | 3.274154483  | 3E-17  |
| ENSG00000237330 | RNF223  | 2.979896669  | 9E-12  |
| ENSG00000269855 | RNF225  | 2.017711897  | 0.0063 |
| ENSG00000204618 | RNF39   | 1.72457099   | 2E-06  |
| ENSG00000135119 | RNFT2   | -1.141641237 | 8E-05  |
| ENSG00000185946 | RNPC3   | -1.077693726 | 4E-05  |
| ENSG00000154133 | ROBO4   | -1.070460946 | 7E-06  |
| ENSG00000065371 | ROPN1   | -2.557071422 | 6E-08  |
| ENSG00000114547 | ROPN1B  | -2.717750584 | 2E-24  |
| ENSG00000198963 | RORB    | -3.060593143 | 1E-11  |
| ENSG00000143365 | RORC    | -1.371800902 | 9E-12  |
| ENSG00000104237 | RP1     | -1.72490685  | 0.0021 |
| ENSG00000181031 | RPH3AL  | -1.326405275 | 2E-05  |
| ENSG00000163584 | RPL22L1 | 1.951318378  | 2E-14  |
| ENSG00000037241 | RPL26L1 | 1.045083781  | 1E-06  |
| ENSG00000140986 | RPL3L   | 2.769580163  | 0.0009 |
| ENSG00000124787 | RPP40   | 1.337913446  | 2E-06  |
| ENSG00000177519 | RPRM    | -1.821685401 | 9E-05  |
| ENSG00000162302 | RPS6KA4 | 1.522336718  | 1E-08  |
| ENSG00000175634 | RPS6KB2 | 1.6463049    | 2E-11  |
| ENSG00000215853 | RPTN    | 1.44895554   | 6E-06  |
| ENSG00000166592 | RRAD    | -1.27227597  | 0.0027 |
| ENSG00000025039 | RRAGD   | -1.314185336 | 6E-10  |
| ENSG00000171848 | RRM2    | 2.328109357  | 1E-10  |
| ENSG00000100218 | RSPH14  | -1.641156593 | 0.0064 |
| ENSG00000111834 | RSPH4A  | -1.306209119 | 0.0038 |
| ENSG00000169218 | RSPO1   | -1.782068132 | 3E-06  |
| ENSG00000146374 | RSPO3   | -1.721926716 | 1E-06  |
| ENSG00000242732 | RTL5    | -1.960146358 | 2E-10  |
| ENSG00000139970 | RTN1    | -1.872283463 | 2E-05  |
| ENSG00000108309 | RUNDC3A | 2.699589436  | 1E-13  |

|                 |         |              |        |
|-----------------|---------|--------------|--------|
| ENSG00000079102 | RUNX1T1 | -1.880758125 | 2E-09  |
| ENSG00000020633 | RUNX3   | -1.211530739 | 6E-09  |
| ENSG00000143171 | RXRG    | -1.652295743 | 5E-07  |
| ENSG00000198626 | RXR2    | -1.886056705 | 1E-05  |
| ENSG00000198838 | RXR3    | -1.555079745 | 2E-10  |
| ENSG00000160678 | S100A1  | -2.353588395 | 3E-22  |
| ENSG00000163191 | S100A11 | 1.606172386  | 4E-08  |
| ENSG00000163221 | S100A12 | 7.015282208  | 7E-11  |
| ENSG00000189334 | S100A14 | 2.29625107   | 4E-14  |
| ENSG00000188643 | S100A16 | 2.387757985  | 5E-14  |
| ENSG00000196754 | S100A2  | 3.203955935  | 2E-15  |
| ENSG00000196154 | S100A4  | -1.093868672 | 1E-07  |
| ENSG00000143556 | S100A7  | 8.589898744  | 9E-32  |
| ENSG00000184330 | S100A7A | 9.131068082  | 5E-18  |
| ENSG00000143546 | S100A8  | 8.671655392  | 4E-36  |
| ENSG00000163220 | S100A9  | 8.286313602  | 5E-34  |
| ENSG00000160307 | S100B   | -2.00227984  | 2E-16  |
| ENSG00000163993 | S100P   | -1.077265118 | 0.0114 |
| ENSG00000170989 | S1PR1   | -1.238946447 | 4E-08  |
| ENSG00000173432 | SAA1    | -1.954743329 | 0.0003 |
| ENSG00000134339 | SAA2    | -1.409744477 | 0.0305 |
| ENSG00000165821 | SALL2   | -1.72652286  | 5E-10  |
| ENSG00000187634 | SAMD11  | -1.471024636 | 0.0324 |
| ENSG00000177570 | SAMD12  | -1.415885728 | 9E-09  |
| ENSG00000020577 | SAMD4A  | -1.771234322 | 1E-09  |
| ENSG00000205413 | SAMD9   | 1.712987129  | 2E-11  |
| ENSG00000155307 | SAMSN1  | 1.495066191  | 0.0064 |
| ENSG00000228727 | SAPCD1  | -1.317348398 | 0.0106 |
| ENSG00000004139 | SARM1   | -1.610444926 | 4E-12  |
| ENSG00000188322 | SBK1    | -1.729730471 | 6E-09  |
| ENSG00000189001 | SBSN    | 3.155938364  | 5E-09  |
| ENSG00000164764 | SBSPON  | -1.922804642 | 3E-09  |
| ENSG00000198794 | SCAMP5  | -1.615210538 | 8E-13  |
| ENSG00000168077 | SCARA3  | -1.226352603 | 1E-07  |
| ENSG00000168079 | SCARA5  | -3.052786816 | 6E-16  |
| ENSG00000143653 | SCCPDH  | -1.130129839 | 5E-09  |
| ENSG00000145284 | SCD5    | -1.893188376 | 2E-12  |
| ENSG00000124935 | SCGB1D2 | -4.484299091 | 5E-15  |
| ENSG00000124939 | SCGB2A1 | -3.846692322 | 2E-21  |
| ENSG00000110484 | SCGB2A2 | -3.98338626  | 8E-15  |
| ENSG00000205209 | SCGB2B2 | -2.741326727 | 9E-09  |
| ENSG00000161055 | SCGB3A1 | -4.689861576 | 3E-09  |
| ENSG00000161929 | SCIMP   | -1.372202036 | 0.0217 |
| ENSG00000006747 | SCIN    | -2.039970508 | 1E-11  |
| ENSG00000146285 | SCML4   | -1.113689387 | 0.019  |
| ENSG00000168356 | SCN11A  | -1.592245784 | 2E-07  |
| ENSG00000136531 | SCN2A   | -1.138053099 | 0.0207 |
| ENSG00000153253 | SCN3A   | -1.450109595 | 0.0117 |

|                 |           |              |        |
|-----------------|-----------|--------------|--------|
| ENSG00000007314 | SCN4A     | -3.299559512 | 4E-08  |
| ENSG00000136546 | SCN7A     | -2.745882139 | 2E-14  |
| ENSG00000169432 | SCN9A     | -1.901668705 | 2E-06  |
| ENSG00000164106 | SCRG1     | -1.859729045 | 0.0007 |
| ENSG00000159307 | SCUBE1    | -2.355930011 | 2E-05  |
| ENSG00000146197 | SCUBE3    | -2.307783181 | 6E-08  |
| ENSG00000115884 | SDC1      | 1.49381912   | 1E-06  |
| ENSG00000169439 | SDC2      | -1.983157668 | 3E-15  |
| ENSG00000125775 | SDCBP2    | 2.102812282  | 3E-09  |
| ENSG00000170786 | SDR16C5   | 2.492712254  | 4E-19  |
| ENSG00000184860 | SDR42E1   | 1.12071248   | 8E-10  |
| ENSG00000170426 | SDR9C7    | 4.474034018  | 2E-15  |
| ENSG00000135094 | SDS       | -1.232382382 | 0.0048 |
| ENSG00000100003 | SEC14L2   | 1.140511697  | 6E-05  |
| ENSG00000103184 | SEC14L5   | -1.30494043  | 5E-05  |
| ENSG00000075826 | SEC31B    | -1.043815624 | 0.0021 |
| ENSG00000132432 | SEC61G    | 1.112571281  | 1E-06  |
| ENSG00000101251 | SEL1L2    | -3.357001677 | 0.0075 |
| ENSG00000007908 | SELE      | 3.00355168   | 4E-06  |
| ENSG00000143416 | SELENBP1  | -2.140462283 | 2E-21  |
| ENSG00000138018 | SELENOI   | 1.267808894  | 4E-24  |
| ENSG00000198832 | SELENOM   | -1.451096029 | 2E-10  |
| ENSG00000250722 | SELENOP   | -1.122593525 | 0.0001 |
| ENSG00000127922 | SEM1      | 1.0492938    | 6E-09  |
| ENSG00000075213 | SEMA3A    | -1.761161883 | 1E-05  |
| ENSG00000012171 | SEMA3B    | -1.769386475 | 9E-11  |
| ENSG00000153993 | SEMA3D    | -3.033177046 | 9E-12  |
| ENSG00000170381 | SEMA3E    | -3.033069838 | 7E-15  |
| ENSG00000010319 | SEMA3G    | -2.547275045 | 1E-25  |
| ENSG00000185033 | SEMA4B    | 1.595505114  | 9E-18  |
| ENSG00000187764 | SEMA4D    | 1.319090909  | 2E-12  |
| ENSG00000112902 | SEMA5A    | -1.124170048 | 2E-06  |
| ENSG00000138623 | SEMA7A    | 1.366459281  | 2E-07  |
| ENSG00000138758 | SEPT11    | -1.212646405 | 4E-07  |
| ENSG00000125354 | SEPT6     | -1.07671382  | 9E-06  |
| ENSG00000164402 | SEPT8     | 1.16032259   | 1E-12  |
| ENSG00000142864 | SERBP1    | 1.152535517  | 7E-23  |
| ENSG00000183569 | SERHL2    | -2.79967779  | 4E-16  |
| ENSG00000168528 | SERINC2   | 1.168193135  | 4E-06  |
| ENSG00000151778 | SERP2     | -1.597572918 | 4E-05  |
| ENSG00000197249 | SERPINA1  | 1.330470759  | 0.0083 |
| ENSG00000165953 | SERPINA12 | 1.758030845  | 3E-05  |
| ENSG00000188488 | SERPINA5  | -3.205487359 | 6E-13  |
| ENSG00000170054 | SERPINA9  | -1.703559928 | 0.0004 |
| ENSG00000021355 | SERPINB1  | 1.3670137    | 0.0026 |
| ENSG00000242550 | SERPINB10 | 2.100851014  | 6E-06  |
| ENSG00000206072 | SERPINB11 | 3.454924266  | 0.0044 |
| ENSG00000166634 | SERPINB12 | 2.48280843   | 2E-11  |

|                 |           |              |        |
|-----------------|-----------|--------------|--------|
| ENSG00000197641 | SERPINB13 | 3.259295913  | 5E-29  |
| ENSG00000197632 | SERPINB2  | 2.045135068  | 7E-09  |
| ENSG00000057149 | SERPINB3  | 6.637250136  | 4E-39  |
| ENSG00000206073 | SERPINB4  | 10.17860256  | 4E-32  |
| ENSG00000206075 | SERPINB5  | 2.325482243  | 6E-15  |
| ENSG00000166396 | SERPINB7  | 3.632106328  | 1E-11  |
| ENSG00000166401 | SERPINB8  | 1.775570374  | 2E-14  |
| ENSG00000106366 | SERPINE1  | 1.589535877  | 9E-08  |
| ENSG00000135919 | SERPINE2  | 1.169225955  | 0.0081 |
| ENSG00000132386 | SERPINF1  | -1.567011721 | 1E-13  |
| ENSG00000149131 | SERPING1  | -2.167021638 | 4E-19  |
| ENSG00000163536 | SERPINI1  | -1.208370179 | 1E-08  |
| ENSG00000187231 | SESTD1    | -1.247877607 | 1E-08  |
| ENSG00000100095 | SEZ6L     | -1.412250954 | 0.0028 |
| ENSG00000198879 | SFMBT2    | -1.00045281  | 0.0002 |
| ENSG00000175793 | SFN       | 3.250012042  | 3E-17  |
| ENSG00000104332 | SFRP1     | -1.379804687 | 6E-09  |
| ENSG00000106483 | SFRP4     | -1.931433609 | 5E-05  |
| ENSG00000120057 | SFRP5     | -3.291560275 | 5E-07  |
| ENSG00000168484 | SFTPC     | -2.831035791 | 0.0005 |
| ENSG00000133661 | SFTPD     | 1.4874792    | 8E-07  |
| ENSG00000108823 | SGCA      | -2.901441898 | 2E-12  |
| ENSG00000127990 | SGCE      | -1.958331953 | 8E-16  |
| ENSG00000102683 | SGCG      | -2.338903068 | 7E-08  |
| ENSG00000163082 | SGPP2     | 1.27469935   | 1E-05  |
| ENSG00000167037 | SGSM1     | -2.494173629 | 4E-15  |
| ENSG00000027869 | SH2D2A    | 2.324636617  | 5E-05  |
| ENSG00000189410 | SH2D5     | 5.786335938  | 1E-12  |
| ENSG00000185437 | SH3BGR    | -1.814508676 | 3E-11  |
| ENSG00000198478 | SH3BGRL2  | -2.028284942 | 8E-17  |
| ENSG00000142669 | SH3BGRL3  | 1.257060712  | 3E-10  |
| ENSG00000140600 | SH3GL3    | 2.457732775  | 1E-07  |
| ENSG00000162105 | SHANK2    | -1.560387827 | 2E-09  |
| ENSG00000107338 | SHB       | 1.603616     | 4E-09  |
| ENSG00000129946 | SHC2      | -1.111126178 | 0.0012 |
| ENSG00000148082 | SHC3      | -1.695051766 | 9E-08  |
| ENSG00000185634 | SHC4      | -1.39188219  | 2E-06  |
| ENSG00000169291 | SHE       | -1.148408054 | 5E-05  |
| ENSG00000138606 | SHF       | -1.17068471  | 8E-09  |
| ENSG00000178343 | SHISA3    | -4.048914553 | 3E-09  |
| ENSG00000198892 | SHISA4    | -1.17207631  | 2E-05  |
| ENSG00000138944 | SHISAL1   | 1.50760194   | 3E-05  |
| ENSG00000182199 | SHMT2     | 1.091801685  | 1E-07  |
| ENSG00000185960 | SHOX      | -3.776863708 | 0.0234 |
| ENSG00000168779 | SHOX2     | -1.47230849  | 4E-06  |
| ENSG00000197417 | SHPK      | 1.135718032  | 1E-10  |
| ENSG00000146950 | SHROOM2   | 1.371109781  | 7E-12  |
| ENSG00000138771 | SHROOM3   | -2.146505236 | 1E-21  |

|                 |          |              |        |
|-----------------|----------|--------------|--------|
| ENSG00000158352 | SHROOM4  | -1.114829273 | 0.0001 |
| ENSG00000181788 | SIAH2    | 1.173094611  | 6E-08  |
| ENSG00000072858 | SIDT1    | -1.654664113 | 4E-06  |
| ENSG00000088827 | SIGLEC1  | -1.231494339 | 8E-05  |
| ENSG00000161640 | SIGLEC11 | -3.122327288 | 0.0098 |
| ENSG00000197046 | SIGLEC15 | -1.18349158  | 0.0037 |
| ENSG00000170145 | SIK2     | -1.461898561 | 3E-14  |
| ENSG00000112246 | SIM1     | -1.996555335 | 1E-05  |
| ENSG00000126778 | SIX1     | -3.300963466 | 3E-17  |
| ENSG00000100625 | SIX4     | -1.503064689 | 0.0003 |
| ENSG00000154839 | SKA1     | 1.883119066  | 2E-07  |
| ENSG00000165480 | SKA3     | 1.939884299  | 3E-09  |
| ENSG00000141293 | SKAP1    | -1.249088134 | 0.0001 |
| ENSG00000188779 | SKOR1    | -1.657604203 | 0.0031 |
| ENSG00000101082 | SLA2     | -1.299551753 | 0.0165 |
| ENSG00000139737 | SLAIN1   | -2.285612292 | 1E-09  |
| ENSG00000026751 | SLAMF7   | 2.296004995  | 4E-11  |
| ENSG00000145283 | SLC10A6  | 2.053760927  | 1E-05  |
| ENSG00000064651 | SLC12A2  | -2.409629143 | 4E-20  |
| ENSG00000113504 | SLC12A7  | -2.114188626 | 5E-19  |
| ENSG00000007216 | SLC13A2  | -3.593926062 | 7E-10  |
| ENSG00000141485 | SLC13A5  | 4.289271965  | 3E-07  |
| ENSG00000141469 | SLC14A1  | -3.495059543 | 2E-30  |
| ENSG00000132874 | SLC14A2  | -3.852344969 | 9E-13  |
| ENSG00000088386 | SLC15A1  | 1.971120595  | 8E-08  |
| ENSG00000163406 | SLC15A2  | -1.195165335 | 0.0003 |
| ENSG00000110446 | SLC15A3  | -1.254208972 | 1E-07  |
| ENSG00000155380 | SLC16A1  | 1.589204162  | 2E-12  |
| ENSG00000174326 | SLC16A11 | -1.01796664  | 0.0079 |
| ENSG00000152779 | SLC16A12 | -2.033494905 | 0.0018 |
| ENSG00000163053 | SLC16A14 | 1.059585631  | 0.0007 |
| ENSG00000147100 | SLC16A2  | -1.000044604 | 5E-05  |
| ENSG00000168679 | SLC16A4  | -1.302663359 | 0.0004 |
| ENSG00000108932 | SLC16A6  | 2.090909629  | 2E-13  |
| ENSG00000165449 | SLC16A9  | 2.066396062  | 3E-05  |
| ENSG00000104888 | SLC17A7  | -2.588169891 | 2E-14  |
| ENSG00000179520 | SLC17A8  | -3.080260774 | 0.0006 |
| ENSG00000165646 | SLC18A2  | -1.185028064 | 0.001  |
| ENSG00000117479 | SLC19A2  | 1.370111849  | 7E-10  |
| ENSG00000135917 | SLC19A3  | -1.454538712 | 2E-06  |
| ENSG00000106688 | SLC1A1   | -1.311845908 | 3E-08  |
| ENSG00000110436 | SLC1A2   | -2.527081916 | 4E-07  |
| ENSG00000175003 | SLC22A1  | -1.066428382 | 0.0245 |
| ENSG00000197891 | SLC22A12 | -3.53084455  | 0.0015 |
| ENSG00000092096 | SLC22A17 | -1.798695537 | 3E-07  |
| ENSG00000137266 | SLC22A23 | 1.520119343  | 2E-20  |
| ENSG00000259803 | SLC22A31 | 1.27815484   | 0.0255 |
| ENSG00000197208 | SLC22A4  | -1.87202728  | 6E-07  |

|                 |          |              |        |
|-----------------|----------|--------------|--------|
| ENSG00000197375 | SLC22A5  | -1.026951678 | 2E-09  |
| ENSG00000170482 | SLC23A1  | 2.330548257  | 3E-11  |
| ENSG00000213901 | SLC23A3  | -1.13162377  | 0.0026 |
| ENSG00000102743 | SLC25A15 | 1.061921133  | 0.0001 |
| ENSG00000182902 | SLC25A18 | -3.031156791 | 7E-06  |
| ENSG00000183032 | SLC25A21 | -1.318885097 | 0.0471 |
| ENSG00000153291 | SLC25A27 | -1.196164567 | 0.0004 |
| ENSG00000197119 | SLC25A29 | -1.109386187 | 4E-05  |
| ENSG00000151729 | SLC25A4  | -1.413464225 | 5E-29  |
| ENSG00000181035 | SLC25A42 | -1.179854247 | 3E-12  |
| ENSG00000145832 | SLC25A48 | -1.211814629 | 0.0015 |
| ENSG00000135502 | SLC26A10 | -1.298060929 | 0.0033 |
| ENSG00000155850 | SLC26A2  | -1.667584182 | 4E-10  |
| ENSG00000170615 | SLC26A5  | -2.473313504 | 0.0002 |
| ENSG00000147606 | SLC26A7  | -1.902633848 | 3E-05  |
| ENSG00000174502 | SLC26A9  | 2.113716347  | 5E-07  |
| ENSG00000130304 | SLC27A1  | -1.416131341 | 2E-08  |
| ENSG00000140284 | SLC27A2  | -1.485409016 | 0.0044 |
| ENSG00000167114 | SLC27A4  | 1.654920082  | 2E-10  |
| ENSG00000113396 | SLC27A6  | -2.276587148 | 0.0002 |
| ENSG00000197506 | SLC28A3  | 2.670447426  | 2E-16  |
| ENSG00000112759 | SLC29A1  | -1.419208628 | 3E-17  |
| ENSG00000174669 | SLC29A2  | -1.384140558 | 3E-08  |
| ENSG00000164638 | SLC29A4  | -1.438144178 | 3E-06  |
| ENSG00000117394 | SLC2A1   | 1.854752163  | 5E-12  |
| ENSG00000197496 | SLC2A10  | -1.427427287 | 0.0004 |
| ENSG00000133460 | SLC2A11  | -1.561698506 | 2E-07  |
| ENSG00000146411 | SLC2A12  | -1.437677451 | 8E-07  |
| ENSG00000181856 | SLC2A4   | -3.686781592 | 3E-28  |
| ENSG00000109667 | SLC2A9   | 1.053895492  | 0.0053 |
| ENSG00000158014 | SLC30A2  | 2.080043879  | 0.0015 |
| ENSG00000131183 | SLC34A1  | 2.623793393  | 3E-06  |
| ENSG00000157765 | SLC34A2  | -2.500575997 | 4E-09  |
| ENSG00000196376 | SLC35F1  | -2.114092234 | 0.0001 |
| ENSG00000177710 | SLC35G5  | -1.253897176 | 0.0166 |
| ENSG00000134955 | SLC37A2  | 2.041581313  | 2E-21  |
| ENSG00000139209 | SLC38A4  | 1.778104818  | 3E-06  |
| ENSG00000017483 | SLC38A5  | 1.71220248   | 3E-19  |
| ENSG00000165794 | SLC39A2  | 2.281715621  | 6E-14  |
| ENSG00000147804 | SLC39A4  | 1.125658001  | 0.001  |
| ENSG00000141424 | SLC39A6  | 1.137916642  | 2E-17  |
| ENSG00000138821 | SLC39A8  | -1.532261927 | 2E-16  |
| ENSG00000138079 | SLC3A1   | -1.819633537 | 0.0168 |
| ENSG00000138449 | SLC40A1  | -1.364891678 | 5E-06  |
| ENSG00000136052 | SLC41A2  | -1.856358931 | 2E-06  |
| ENSG00000204385 | SLC44A4  | -1.928888412 | 5E-07  |
| ENSG00000162426 | SLC45A1  | -1.40449212  | 0.0062 |
| ENSG00000164175 | SLC45A2  | 1.633417753  | 0.0003 |



|                 |           |              |        |
|-----------------|-----------|--------------|--------|
| ENSG00000076351 | SLC46A1   | -2.20480704  | 6E-18  |
| ENSG00000119457 | SLC46A2   | 3.050761654  | 3E-07  |
| ENSG00000139508 | SLC46A3   | -1.336345417 | 9E-07  |
| ENSG00000180638 | SLC47A2   | 1.824260248  | 4E-05  |
| ENSG00000004939 | SLC4A1    | -2.747826935 | 1E-06  |
| ENSG00000080493 | SLC4A4    | -3.762187318 | 2E-16  |
| ENSG00000188687 | SLC4A5    | -1.182029161 | 0.007  |
| ENSG00000050438 | SLC4A8    | 1.656613356  | 2E-12  |
| ENSG00000100170 | SLC5A1    | 1.834983425  | 2E-07  |
| ENSG00000154025 | SLC5A10   | 2.48570499   | 9E-13  |
| ENSG00000105641 | SLC5A5    | 2.586058244  | 0.0063 |
| ENSG00000132164 | SLC6A11   | 3.114288134  | 4E-36  |
| ENSG00000111181 | SLC6A12   | -1.797424843 | 0.001  |
| ENSG00000072041 | SLC6A15   | 1.572426022  | 9E-07  |
| ENSG00000063127 | SLC6A16   | -2.076799506 | 2E-07  |
| ENSG00000196517 | SLC6A9    | 1.295137543  | 1E-07  |
| ENSG00000139514 | SLC7A1    | 1.311200852  | 7E-11  |
| ENSG00000130876 | SLC7A10   | -3.553758674 | 7E-11  |
| ENSG00000151012 | SLC7A11   | 3.495947378  | 7E-22  |
| ENSG00000003989 | SLC7A2    | -1.259761675 | 3E-06  |
| ENSG00000103257 | SLC7A5    | 2.683665875  | 2E-15  |
| ENSG00000155465 | SLC7A7    | -1.340972796 | 0.0005 |
| ENSG00000092068 | SLC7A8    | 1.377812518  | 7E-13  |
| ENSG00000021488 | SLC7A9    | -2.468885164 | 0.0029 |
| ENSG00000183023 | SLC8A1    | -1.114575072 | 0.0015 |
| ENSG00000100678 | SLC8A3    | -1.836285951 | 0.0061 |
| ENSG00000115616 | SLC9A2    | -3.31492913  | 3E-20  |
| ENSG00000065054 | SLC9A3R2  | -1.206794568 | 2E-12  |
| ENSG00000180251 | SLC9A4    | -2.871669902 | 3E-15  |
| ENSG00000164037 | SLC9B1    | -1.481028414 | 7E-05  |
| ENSG00000173930 | SLCO4C1   | -1.283878086 | 0.029  |
| ENSG00000154760 | SLFN13    | -1.063178486 | 0.0001 |
| ENSG00000187122 | SLIT1     | -2.902261401 | 0.0016 |
| ENSG00000145147 | SLIT2     | -1.751200397 | 1E-09  |
| ENSG00000184347 | SLIT3     | -2.83503706  | 3E-14  |
| ENSG00000185985 | SLITRK2   | -1.543811484 | 7E-08  |
| ENSG00000179542 | SLITRK4   | -1.745099997 | 2E-09  |
| ENSG00000165300 | SLITRK5   | -3.381819347 | 5E-12  |
| ENSG00000124107 | SLPI      | 2.59652142   | 1E-10  |
| ENSG00000126233 | SLURP1    | 4.631979494  | 6E-15  |
| ENSG00000283992 | SLURP2    | 4.242522608  | 8E-09  |
| ENSG00000120693 | SMAD9     | -1.294277258 | 2E-07  |
| ENSG00000170545 | SMAGP     | 1.141882807  | 5E-08  |
| ENSG00000102038 | SMARCA1   | -1.069936988 | 3E-06  |
| ENSG00000082014 | SMARCD3   | -1.121669621 | 1E-06  |
| ENSG00000165935 | SMCO2     | 2.00244936   | 2E-05  |
| ENSG00000184785 | SMIM10    | -1.534693347 | 1E-07  |
| ENSG00000178947 | SMIM10L2A | -2.078147091 | 4E-17  |



|                 |           |              |        |
|-----------------|-----------|--------------|--------|
| ENSG00000196972 | SMIM10L2B | -1.238523271 | 0.0028 |
| ENSG00000267795 | SMIM22    | -2.14806282  | 5E-09  |
| ENSG00000248771 | SMIM31    | -2.544748355 | 0.0285 |
| ENSG00000204323 | SMIM5     | 2.065817726  | 3E-09  |
| ENSG00000198732 | SMOC1     | -2.439632914 | 8E-09  |
| ENSG00000112562 | SMOC2     | -1.358958746 | 6E-08  |
| ENSG00000088826 | SMOX      | 2.773148906  | 1E-11  |
| ENSG00000135587 | SMPD2     | 1.548070856  | 3E-17  |
| ENSG00000103056 | SMPD3     | 2.688293549  | 7E-18  |
| ENSG00000132639 | SNAP25    | 1.450001977  | 0.0374 |
| ENSG00000145335 | SNCA      | -1.252063461 | 6E-09  |
| ENSG00000064692 | SNCAIP    | -1.000806473 | 0.0003 |
| ENSG00000074317 | SNCB      | 5.169723278  | 5E-11  |
| ENSG00000173267 | SNCG      | -2.539376668 | 1E-31  |
| ENSG00000162804 | SNED1     | -1.649966424 | 9E-09  |
| ENSG00000182600 | SNORC     | -2.153041321 | 2E-19  |
| ENSG00000143977 | SNRPG     | 1.106088658  | 2E-06  |
| ENSG00000128739 | SNRPN     | -1.276759655 | 0.0084 |
| ENSG00000172164 | SNTB1     | -1.508399416 | 1E-10  |
| ENSG00000112320 | SOBP      | -2.162865969 | 2E-21  |
| ENSG00000184557 | SOCS3     | 1.294324543  | 0.0019 |
| ENSG00000109610 | SOD3      | -3.01115172  | 4E-36  |
| ENSG00000095637 | SORBS1    | -2.947903008 | 7E-24  |
| ENSG00000154556 | SORBS2    | -2.222467497 | 9E-23  |
| ENSG00000156395 | SORCS3    | -2.78832614  | 0.0002 |
| ENSG00000137642 | SORL1     | -1.299839343 | 3E-06  |
| ENSG00000198944 | SOWAHA    | -2.252166703 | 0.0067 |
| ENSG00000198142 | SOWAHC    | 1.043597629  | 7E-13  |
| ENSG00000100146 | SOX10     | -1.857078816 | 3E-15  |
| ENSG00000143842 | SOX13     | -1.834437098 | 1E-29  |
| ENSG00000129194 | SOX15     | 1.744404061  | 2E-08  |
| ENSG00000125285 | SOX21     | 1.661162929  | 6E-07  |
| ENSG00000134532 | SOX5      | -2.340212449 | 2E-11  |
| ENSG00000171056 | SOX7      | 1.303043514  | 1E-09  |
| ENSG00000005513 | SOX8      | -3.089499611 | 9E-24  |
| ENSG00000125398 | SOX9      | -1.382872219 | 2E-08  |
| ENSG00000079263 | SP140     | -1.38122359  | 0.0002 |
| ENSG00000204335 | SP5       | -1.665139592 | 0.0134 |
| ENSG00000189120 | SP6       | 1.457286706  | 1E-05  |
| ENSG00000235387 | SPAAR     | -2.770954346 | 6E-10  |
| ENSG00000177202 | SPACA4    | 2.715324383  | 0.023  |
| ENSG00000182310 | SPACA6    | -1.219772448 | 1E-05  |
| ENSG00000104450 | SPAG1     | 1.088710333  | 1E-08  |
| ENSG00000077327 | SPAG6     | -3.031868486 | 0.0002 |
| ENSG00000137098 | SPAG8     | -2.023172897 | 0.0041 |
| ENSG00000152583 | SPARCL1   | -1.779260936 | 6E-17  |
| ENSG00000186451 | SPATA12   | 2.218383832  | 0.0081 |
| ENSG00000006282 | SPATA20   | -1.023871645 | 3E-10  |

|                 |         |              |        |
|-----------------|---------|--------------|--------|
| ENSG00000170469 | SPATA24 | 1.040591032  | 0.0008 |
| ENSG00000145757 | SPATA9  | -2.551791373 | 0.0008 |
| ENSG00000161888 | SPC24   | 1.425407096  | 2E-06  |
| ENSG00000152253 | SPC25   | 1.889917739  | 8E-08  |
| ENSG00000124664 | SPDEF   | -3.667447145 | 4E-20  |
| ENSG00000152582 | SPEF2   | -1.948003621 | 1E-08  |
| ENSG00000072195 | SPEG    | -1.191938326 | 3E-07  |
| ENSG00000153820 | SPHKAP  | -1.510207999 | 0.0051 |
| ENSG00000186767 | SPIN4   | 1.086488983  | 0.0046 |
| ENSG00000214510 | SPINK13 | 4.79248329   | 2E-05  |
| ENSG00000178172 | SPINK6  | 5.85086389   | 1E-10  |
| ENSG00000145879 | SPINK7  | 6.391738381  | 2E-28  |
| ENSG00000204909 | SPINK9  | 7.70144144   | 2E-19  |
| ENSG00000183018 | SPNS2   | 1.138394668  | 3E-05  |
| ENSG00000152377 | SPOCK1  | -2.260692822 | 2E-12  |
| ENSG00000118785 | SPP1    | -3.062302111 | 3E-06  |
| ENSG00000169474 | SPRR1A  | 8.415767634  | 4E-26  |
| ENSG00000169469 | SPRR1B  | 7.961842896  | 8E-14  |
| ENSG00000241794 | SPRR2A  | 11.73990088  | 3E-25  |
| ENSG00000196805 | SPRR2B  | 7.700076954  | 5E-15  |
| ENSG00000163216 | SPRR2D  | 7.041736506  | 2E-13  |
| ENSG00000203785 | SPRR2E  | 5.775129303  | 4E-19  |
| ENSG00000244094 | SPRR2F  | 5.257038014  | 3E-06  |
| ENSG00000159516 | SPRR2G  | 4.657718178  | 3E-30  |
| ENSG00000163209 | SPRR3   | 9.179143609  | 2E-16  |
| ENSG00000184148 | SPRR4   | 2.970345944  | 1E-10  |
| ENSG00000283227 | SPRR5   | 2.241627327  | 0.0054 |
| ENSG00000070182 | SPTB    | -2.546341026 | 2E-08  |
| ENSG00000115306 | SPTBN1  | -1.518615801 | 3E-15  |
| ENSG00000160460 | SPTBN4  | -2.337503986 | 4E-12  |
| ENSG00000134548 | SPX     | -4.77590468  | 9E-09  |
| ENSG00000104549 | SQLE    | 2.000687018  | 7E-25  |
| ENSG00000137767 | SQOR    | 1.039810087  | 0.0003 |
| ENSG00000183888 | SRARP   | -4.101975358 | 0.0005 |
| ENSG00000128039 | SRD5A3  | 1.030414172  | 3E-11  |
| ENSG00000196220 | SRGAP3  | -1.048281206 | 0.0002 |
| ENSG00000185739 | SRL     | -2.067904693 | 1E-09  |
| ENSG00000096063 | SRPK1   | 1.213822811  | 7E-07  |
| ENSG00000184343 | SRPK3   | -2.921583823 | 0.0002 |
| ENSG00000101955 | SRPX    | -1.600708976 | 1E-09  |
| ENSG00000102359 | SRPX2   | -1.846073478 | 3E-09  |
| ENSG00000139767 | SRRM4   | -4.382717161 | 0.0001 |
| ENSG00000111786 | SRSF9   | 1.017611359  | 6E-08  |
| ENSG00000179954 | SSC5D   | -2.112445476 | 3E-06  |
| ENSG00000123096 | SSPN    | -2.254535326 | 4E-23  |
| ENSG00000197558 | SSPO    | -1.501469672 | 0.0007 |
| ENSG00000139874 | SSTR1   | -2.116990211 | 0.0008 |
| ENSG00000180616 | SSTR2   | -1.144986202 | 0.0013 |

|                 |            |              |        |
|-----------------|------------|--------------|--------|
| ENSG00000149418 | ST14       | 1.431679917  | 1E-09  |
| ENSG00000008513 | ST3GAL1    | -1.441837688 | 3E-08  |
| ENSG00000110080 | ST3GAL4    | -1.088560902 | 6E-07  |
| ENSG00000073849 | ST6GAL1    | -1.679490736 | 3E-09  |
| ENSG00000070526 | ST6GALNAC1 | 1.112690324  | 0.0367 |
| ENSG00000117069 | ST6GALNAC5 | -2.528110836 | 3E-10  |
| ENSG00000140557 | ST8SIA2    | 5.248049522  | 1E-13  |
| ENSG00000148488 | ST8SIA6    | -1.140825855 | 0.027  |
| ENSG00000144681 | STAC       | -1.623331008 | 7E-06  |
| ENSG00000141750 | STAC2      | -1.958284622 | 6E-11  |
| ENSG00000066923 | STAG3      | -1.302598857 | 0.0042 |
| ENSG00000136738 | STAM       | 1.073868608  | 7E-06  |
| ENSG00000178078 | STAP2      | 1.079017048  | 3E-08  |
| ENSG00000214530 | STARD10    | 1.026054481  | 5E-09  |
| ENSG00000133121 | STARD13    | -1.238982093 | 6E-08  |
| ENSG00000164211 | STARD4     | 1.764025289  | 1E-08  |
| ENSG00000130052 | STARD8     | -1.01565592  | 2E-05  |
| ENSG00000159433 | STARD9     | -1.458855441 | 5E-08  |
| ENSG00000138378 | STAT4      | -1.336342169 | 0.0002 |
| ENSG00000126561 | STAT5A     | -1.326633485 | 4E-13  |
| ENSG00000118804 | STBD1      | -2.05708658  | 0.0199 |
| ENSG00000105889 | STEAP1B    | 3.654041512  | 4E-09  |
| ENSG00000157214 | STEAP2     | -1.72402018  | 3E-13  |
| ENSG00000123473 | STIL       | 1.473190957  | 1E-07  |
| ENSG00000196335 | STK31      | -1.793622206 | 0.003  |
| ENSG00000169302 | STK32A     | -2.406343751 | 2E-27  |
| ENSG00000152953 | STK32B     | -1.414337347 | 4E-06  |
| ENSG00000130413 | STK33      | -1.606058423 | 0.0141 |
| ENSG00000198870 | STKLD1     | -1.236510802 | 0.0009 |
| ENSG00000104435 | STMN2      | -1.568620819 | 2E-05  |
| ENSG00000230873 | STMND1     | -2.393880239 | 0.0251 |
| ENSG00000243244 | STON1      | -1.068822993 | 3E-05  |
| ENSG00000140022 | STON2      | 1.589324125  | 4E-18  |
| ENSG00000239605 | STPG4      | -3.222119054 | 0.0003 |
| ENSG00000242866 | STRC       | -2.539931673 | 0.0002 |
| ENSG00000128578 | STRIP2     | 2.117700838  | 3E-05  |
| ENSG00000203685 | STUM       | -2.3357136   | 4E-08  |
| ENSG00000060140 | STYK1      | 1.313548879  | 0.0009 |
| ENSG00000113387 | SUB1       | 1.042176204  | 4E-05  |
| ENSG00000198829 | SUCNR1     | -1.363432533 | 0.0014 |
| ENSG00000196562 | SULF2      | 1.448124558  | 1E-18  |
| ENSG00000196502 | SULT1A1    | -2.103677828 | 2E-15  |
| ENSG00000197165 | SULT1A2    | -2.871317839 | 4E-05  |
| ENSG00000198075 | SULT1C4    | -2.468526131 | 1E-06  |
| ENSG00000088002 | SULT2B1    | 3.138007292  | 6E-15  |
| ENSG00000139531 | SUOX       | -1.156989411 | 1E-11  |
| ENSG00000099994 | SUSD2      | -1.346353159 | 0.0013 |
| ENSG00000173705 | SUSD5      | -1.390975298 | 7E-05  |

|                 |          |              |        |
|-----------------|----------|--------------|--------|
| ENSG00000185518 | SV2B     | -1.243146117 | 0.0004 |
| ENSG00000165124 | SVEP1    | -3.368065394 | 2E-17  |
| ENSG00000198168 | SVIP     | -1.450320553 | 2E-10  |
| ENSG00000157703 | SVOPL    | -2.446808457 | 3E-06  |
| ENSG00000147642 | SYBU     | -1.626665052 | 1E-15  |
| ENSG00000198765 | SYCP1    | -2.813014566 | 0.0012 |
| ENSG00000196074 | SYCP2    | -1.331047539 | 4E-06  |
| ENSG00000153157 | SYCP2L   | -1.65323423  | 0.0012 |
| ENSG00000097096 | SYDE2    | -2.247671514 | 1E-10  |
| ENSG00000165025 | SYK      | 1.032570068  | 1E-16  |
| ENSG00000157152 | SYN2     | -1.947669178 | 4E-11  |
| ENSG00000185666 | SYN3     | -2.75290025  | 0.0006 |
| ENSG00000101463 | SYNDIG1  | -3.240816013 | 0.0002 |
| ENSG00000183379 | SYNDIG1L | -4.007735975 | 0.0001 |
| ENSG00000131018 | SYNE1    | -2.076968994 | 8E-12  |
| ENSG00000176438 | SYNE3    | -1.859245442 | 3E-11  |
| ENSG00000181392 | SYNE4    | -1.698362862 | 0.0008 |
| ENSG00000182253 | SYNM     | -2.370523016 | 8E-17  |
| ENSG00000171992 | SYNPO    | -1.152686778 | 3E-08  |
| ENSG00000172403 | SYNPO2   | -1.855922177 | 3E-15  |
| ENSG00000166317 | SYNPO2L  | 4.439974989  | 6E-20  |
| ENSG00000102003 | SYP      | -1.216924904 | 3E-07  |
| ENSG00000143028 | SYPL2    | -1.723013269 | 8E-05  |
| ENSG00000067715 | SYT1     | -1.880300414 | 7E-06  |
| ENSG00000019505 | SYT13    | -1.52150961  | 2E-09  |
| ENSG00000103528 | SYT17    | -1.714822511 | 2E-05  |
| ENSG00000170743 | SYT9     | -3.014862222 | 0.0095 |
| ENSG00000166863 | TAC3     | -2.607618021 | 0.0037 |
| ENSG00000147526 | TACC1    | -1.475772607 | 1E-13  |
| ENSG00000013810 | TACC3    | 1.09255688   | 0.0003 |
| ENSG00000115353 | TACR1    | -1.460564989 | 0.0003 |
| ENSG00000075073 | TACR2    | -1.525472857 | 0.0351 |
| ENSG00000149591 | TAGLN    | -1.885222638 | 2E-19  |
| ENSG00000158710 | TAGLN2   | 1.095773735  | 2E-06  |
| ENSG00000144834 | TAGLN3   | 3.653981618  | 6E-05  |
| ENSG00000113407 | TARS     | 1.095313469  | 2E-10  |
| ENSG00000127364 | TAS2R4   | -1.746780078 | 6E-05  |
| ENSG00000166220 | TBATA    | -3.297183244 | 6E-05  |
| ENSG00000167291 | TBC1D16  | -1.080329428 | 1E-06  |
| ENSG00000095383 | TBC1D2   | 1.077262523  | 6E-06  |
| ENSG00000162065 | TBC1D24  | -1.30092015  | 2E-10  |
| ENSG00000109436 | TBC1D9   | -1.28857943  | 3E-06  |
| ENSG00000092607 | TBX15    | -2.518800404 | 9E-20  |
| ENSG00000112837 | TBX18    | -2.224891436 | 7E-12  |
| ENSG00000073861 | TBX21    | -1.814341522 | 0.0059 |
| ENSG00000122145 | TBX22    | -3.466867885 | 0.0007 |
| ENSG00000135111 | TBX3     | -1.756923897 | 4E-19  |
| ENSG00000089225 | TBX5     | -1.510633851 | 0.0004 |

|                 |         |              |        |
|-----------------|---------|--------------|--------|
| ENSG00000006638 | TBXA2R  | -1.272765372 | 0.001  |
| ENSG00000170379 | TCAF2   | 1.449613784  | 5E-08  |
| ENSG00000173991 | TCAP    | -1.421484229 | 0.0023 |
| ENSG00000204219 | TCEA3   | -1.023087524 | 0.0008 |
| ENSG00000184905 | TCEAL2  | -3.123574815 | 8E-10  |
| ENSG00000196507 | TCEAL3  | -1.085875301 | 4E-08  |
| ENSG00000204065 | TCEAL5  | -2.262548707 | 0.0001 |
| ENSG00000204071 | TCEAL6  | -4.051928042 | 0.0002 |
| ENSG00000182916 | TCEAL7  | -1.337274211 | 0.0004 |
| ENSG00000152284 | TCF7L1  | -1.464801437 | 1E-17  |
| ENSG00000148737 | TCF7L2  | -1.230021231 | 5E-08  |
| ENSG00000134827 | TCN1    | 4.195944663  | 1E-08  |
| ENSG00000185339 | TCN2    | -1.279880723 | 2E-09  |
| ENSG00000242220 | TCP10L  | -2.769256064 | 0.0254 |
| ENSG00000146221 | TCTE1   | -2.207625971 | 0.0176 |
| ENSG00000151790 | TDO2    | 3.710658817  | 3E-06  |
| ENSG00000095627 | TDRD1   | -2.408421723 | 0.02   |
| ENSG00000163239 | TDRD10  | -1.208711014 | 0.0002 |
| ENSG00000180113 | TDRD6   | -1.214480447 | 0.0027 |
| ENSG00000197905 | TEAD4   | 1.508230473  | 7E-06  |
| ENSG00000162062 | TEDC2   | 1.154366478  | 0.0124 |
| ENSG00000120156 | TEK     | -1.229573602 | 5E-08  |
| ENSG00000125409 | TEKT3   | -1.450793181 | 0.0062 |
| ENSG00000009694 | TENM1   | -2.853715766 | 3E-11  |
| ENSG00000145934 | TENM2   | 1.238343294  | 4E-07  |
| ENSG00000158246 | TENT5B  | 1.653487596  | 4E-08  |
| ENSG00000183508 | TENT5C  | -1.863070446 | 3E-07  |
| ENSG00000159648 | TEPP    | 1.364245441  | 0.006  |
| ENSG00000088992 | TESC    | -2.35170894  | 8E-11  |
| ENSG00000138336 | TET1    | -1.693136964 | 3E-07  |
| ENSG00000131126 | TEX101  | 4.563698473  | 1E-08  |
| ENSG00000133863 | TEX15   | 3.377931963  | 0.0074 |
| ENSG00000091513 | TF      | -2.520482053 | 1E-17  |
| ENSG00000008196 | TFAP2B  | -1.500255535 | 3E-05  |
| ENSG00000115112 | TFCP2L1 | -1.66460253  | 4E-11  |
| ENSG00000198176 | TFDP1   | 1.17200717   | 8E-15  |
| ENSG00000105967 | TFEC    | -1.096479976 | 0.0044 |
| ENSG00000003436 | TFPI    | -1.187770916 | 7E-05  |
| ENSG00000105825 | TFPI2   | -2.813212624 | 8E-10  |
| ENSG00000042832 | TG      | -3.471605078 | 2E-26  |
| ENSG00000163235 | TGFA    | 1.099771934  | 0.0009 |
| ENSG00000163513 | TGFBR2  | -1.293771845 | 4E-09  |
| ENSG00000069702 | TGFBR3  | -1.977303807 | 6E-13  |
| ENSG00000092295 | TGM1    | 4.081429745  | 9E-23  |
| ENSG00000198959 | TGM2    | -1.423707622 | 0.0002 |
| ENSG00000125780 | TGM3    | 3.54218796   | 2E-18  |
| ENSG00000163810 | TGM4    | 3.668442286  | 1E-05  |
| ENSG00000104055 | TGM5    | 1.558889823  | 9E-08  |

|                 |         |              |        |
|-----------------|---------|--------------|--------|
| ENSG00000180176 | TH      | 2.538521503  | 4E-05  |
| ENSG00000178726 | THBD    | 1.416452285  | 8E-07  |
| ENSG00000137801 | THBS1   | -1.20810612  | 9E-05  |
| ENSG00000113296 | THBS4   | -1.477513309 | 1E-05  |
| ENSG00000196407 | THEM5   | 3.160421517  | 3E-08  |
| ENSG00000051596 | THOC3   | 1.065172078  | 4E-07  |
| ENSG00000090534 | THPO    | -2.406726852 | 0.0007 |
| ENSG00000126351 | THRA    | -1.343947221 | 8E-12  |
| ENSG00000151365 | THRSP   | -3.543531713 | 1E-08  |
| ENSG00000005108 | THSD7A  | -1.006312599 | 0.0017 |
| ENSG00000144229 | THSD7B  | -1.901850329 | 0.0124 |
| ENSG00000156299 | TIAM1   | 1.173804507  | 1E-19  |
| ENSG00000146426 | TIAM2   | -1.110029032 | 9E-09  |
| ENSG00000140534 | TICRR   | 2.018801679  | 8E-08  |
| ENSG00000078237 | TIGAR   | 1.532118296  | 4E-07  |
| ENSG00000140993 | TIGD7   | -1.287101342 | 2E-11  |
| ENSG00000145850 | TIMD4   | -3.208002706 | 0.0014 |
| ENSG00000099800 | TIMM13  | 1.255531507  | 2E-08  |
| ENSG00000150779 | TIMM8B  | 1.101728496  | 4E-07  |
| ENSG00000035862 | TIMP2   | -1.757652477 | 8E-11  |
| ENSG00000100234 | TIMP3   | -2.854990348 | 2E-24  |
| ENSG00000157150 | TIMP4   | -3.603143309 | 6E-30  |
| ENSG00000142910 | TINAGL1 | -1.762304477 | 2E-22  |
| ENSG00000167900 | TK1     | 1.783147759  | 6E-07  |
| ENSG00000166548 | TK2     | -1.374430739 | 2E-19  |
| ENSG00000007350 | TKTL1   | 2.356563135  | 5E-05  |
| ENSG00000140950 | TLDC1   | 1.335019963  | 6E-09  |
| ENSG00000065717 | TLE2    | -2.311019154 | 6E-24  |
| ENSG00000140332 | TLE3    | 1.05619921   | 3E-07  |
| ENSG00000104953 | TLE6    | -2.687460841 | 3E-06  |
| ENSG00000038295 | TLL1    | -1.397495188 | 6E-06  |
| ENSG00000095587 | TLL2    | 2.059866281  | 0.0026 |
| ENSG00000171914 | TLN2    | -2.260569057 | 6E-28  |
| ENSG00000136869 | TLR4    | -1.064336483 | 0.0016 |
| ENSG00000163762 | TM4SF18 | -1.003994346 | 0.0008 |
| ENSG00000136404 | TM6SF1  | -1.290786269 | 5E-06  |
| ENSG00000149488 | TMC2    | -3.942956307 | 3E-05  |
| ENSG00000167608 | TMC4    | -2.091004376 | 7E-15  |
| ENSG00000170537 | TMC7    | 1.110283574  | 0.0081 |
| ENSG00000162542 | TMCO4   | -1.144905022 | 6E-15  |
| ENSG00000144339 | TMEFF2  | -1.860082075 | 0.0435 |
| ENSG00000166292 | TMEM100 | -1.810103687 | 9E-11  |
| ENSG00000185332 | TMEM105 | 1.424699425  | 2E-05  |
| ENSG00000144868 | TMEM108 | -2.378091268 | 0.0004 |
| ENSG00000139173 | TMEM117 | 1.889576579  | 4E-21  |
| ENSG00000184986 | TMEM121 | -1.456163605 | 0.0117 |
| ENSG00000179178 | TMEM125 | 1.369792028  | 2E-05  |
| ENSG00000166448 | TMEM130 | -1.544671357 | 0.0198 |

|                 |           |              |        |
|-----------------|-----------|--------------|--------|
| ENSG00000139364 | TMEM132B  | -1.183492458 | 0.0071 |
| ENSG00000181234 | TMEM132C  | -4.259058741 | 1E-12  |
| ENSG00000151952 | TMEM132D  | 2.735571886  | 0.0295 |
| ENSG00000181264 | TMEM136   | -1.07037661  | 0.0004 |
| ENSG00000178826 | TMEM139   | -1.9612111   | 4E-20  |
| ENSG00000146859 | TMEM140   | -1.561628622 | 1E-10  |
| ENSG00000180061 | TMEM150B  | -1.571485368 | 0.0302 |
| ENSG00000249242 | TMEM150C  | -1.543845728 | 5E-08  |
| ENSG00000170006 | TMEM154   | 1.49810152   | 1E-26  |
| ENSG00000249992 | TMEM158   | 1.186051654  | 0.041  |
| ENSG00000163449 | TMEM169   | -1.10200475  | 0.0053 |
| ENSG00000157111 | TMEM171   | 1.446916168  | 0.0131 |
| ENSG00000002933 | TMEM176A  | -1.327343124 | 9E-07  |
| ENSG00000106565 | TMEM176B  | -1.543497122 | 5E-10  |
| ENSG00000152154 | TMEM178A  | -1.764225885 | 9E-07  |
| ENSG00000261115 | TMEM178B  | -2.307393672 | 4E-09  |
| ENSG00000164855 | TMEM184A  | 1.228665121  | 3E-06  |
| ENSG00000206432 | TMEM200C  | -2.712062091 | 9E-09  |
| ENSG00000065600 | TMEM206   | 1.437528155  | 4E-08  |
| ENSG00000206069 | TMEM211   | -3.162441563 | 8E-15  |
| ENSG00000214128 | TMEM213   | -3.237375433 | 2E-09  |
| ENSG00000186952 | TMEM232   | -1.480298727 | 0.0043 |
| ENSG00000134490 | TMEM241   | 1.307082338  | 7E-10  |
| ENSG00000149582 | TMEM25    | -1.449904119 | 6E-14  |
| ENSG00000125355 | TMEM255A  | -1.376715065 | 0.0026 |
| ENSG00000169758 | TMEM266   | -1.420838843 | 0.0009 |
| ENSG00000204161 | TMEM273   | -1.030200707 | 1E-06  |
| ENSG00000126950 | TMEM35A   | -2.376952639 | 6E-05  |
| ENSG00000171227 | TMEM37    | -1.618750672 | 4E-13  |
| ENSG00000072954 | TMEM38A   | -1.371559351 | 1E-11  |
| ENSG00000088726 | TMEM40    | 2.63335124   | 6E-17  |
| ENSG00000181458 | TMEM45A   | 2.273764938  | 7E-15  |
| ENSG00000151715 | TMEM45B   | 2.786188731  | 9E-22  |
| ENSG00000147027 | TMEM47    | -2.129559914 | 4E-16  |
| ENSG00000121900 | TMEM54    | 2.204980291  | 9E-14  |
| ENSG00000152078 | TMEM56    | -1.844883839 | 1E-05  |
| ENSG00000196187 | TMEM63A   | -1.17851286  | 1E-09  |
| ENSG00000163472 | TMEM79    | 2.228784595  | 2E-13  |
| ENSG00000151117 | TMEM86A   | 2.367288647  | 1E-13  |
| ENSG00000137103 | TMEM8B    | -2.396476582 | 5E-26  |
| ENSG00000136842 | TMOD1     | -2.245478262 | 1E-17  |
| ENSG00000187054 | TMPRSS11A | 4.278233568  | 0.0013 |
| ENSG00000153802 | TMPRSS11D | 7.863514381  | 2E-23  |
| ENSG00000198092 | TMPRSS11F | 1.759733715  | 6E-06  |
| ENSG00000137747 | TMPRSS13  | 1.873396349  | 2E-14  |
| ENSG00000184012 | TMPRSS2   | -3.551915258 | 5E-17  |
| ENSG00000160183 | TMPRSS3   | -2.955444976 | 1E-13  |
| ENSG00000137648 | TMPRSS4   | 4.093422108  | 4E-26  |



|                  |           |              |        |
|------------------|-----------|--------------|--------|
| ENSG00000166682  | TMPRSS5   | -1.19754861  | 0.0051 |
| ENSG00000187045  | TMPRSS6   | -2.832065    | 0.0002 |
| ENSG00000133687  | TMTC1     | -1.843007344 | 2E-12  |
| ENSG00000139324  | TMTC3     | 1.244541846  | 4E-10  |
| ENSG00000041982  | TNC       | 1.008482093  | 0.002  |
| ENSG00000183578  | TNFAIP8L3 | 1.57472128   | 3E-09  |
| ENSG00000164761  | TNFRSF11B | -1.258469443 | 0.0091 |
| ENSG00000028137  | TNFRSF1B  | -1.000414903 | 0.0003 |
| ENSG00000146072  | TNFRSF21  | 1.617801592  | 1E-07  |
| ENSG00000120949  | TNFRSF8   | -1.119466575 | 0.0394 |
| ENSG00000049249  | TNFRSF9   | 1.89879581   | 0.032  |
| ENSG00000239697  | TNFSF12   | -1.732626753 | 6E-16  |
| ENSG00000125657  | TNFSF9    | 1.054095918  | 0.0107 |
| ENSG00000154310  | TNIK      | -1.237650004 | 7E-05  |
| ENSG00000050730  | TNIP3     | 1.464617045  | 0.018  |
| ENSG000000000005 | TNMD      | -4.320453429 | 7E-33  |
| ENSG00000120332  | TNN       | -2.295514887 | 1E-07  |
| ENSG00000130598  | TNNI2     | -1.058211264 | 0.009  |
| ENSG00000105048  | TNNT1     | 1.479438964  | 4E-07  |
| ENSG00000118194  | TNNT2     | -1.097874877 | 0.0002 |
| ENSG00000130595  | TNNT3     | -1.666509205 | 1E-05  |
| ENSG00000078687  | TNRC6C    | -1.313209592 | 6E-09  |
| ENSG00000079308  | TNS1      | -2.429166012 | 1E-26  |
| ENSG00000111077  | TNS2      | -2.132182587 | 6E-25  |
| ENSG00000136205  | TNS3      | -1.789824995 | 4E-21  |
| ENSG00000168477  | TNXB      | -3.222861821 | 3E-17  |
| ENSG00000189350  | TOGARAM2  | -2.072284768 | 2E-06  |
| ENSG00000198113  | TOR4A     | 1.532176318  | 0.0052 |
| ENSG00000103460  | TOX3      | -3.320496343 | 3E-05  |
| ENSG00000115129  | TP53I3    | 1.220499076  | 3E-07  |
| ENSG00000124251  | TP53TG5   | -2.563431713 | 0.0021 |
| ENSG00000073282  | TP63      | 1.616887277  | 9E-18  |
| ENSG00000146242  | TPBG      | 2.141385384  | 2E-41  |
| ENSG00000111669  | TPI1      | 1.171171899  | 1E-06  |
| ENSG00000140416  | TPM1      | -1.177823752 | 9E-12  |
| ENSG00000198467  | TPM2      | -1.79681645  | 1E-17  |
| ENSG00000115705  | TPO       | -2.316737438 | 6E-08  |
| ENSG00000171368  | TPPP      | -1.835927685 | 4E-06  |
| ENSG00000179636  | TPPP2     | -2.613887607 | 0.0276 |
| ENSG00000088325  | TPX2      | 1.745605474  | 3E-09  |
| ENSG00000186854  | TRABD2A   | -1.004819833 | 0.0055 |
| ENSG00000269113  | TRABD2B   | -1.070359107 | 2E-06  |
| ENSG00000211870  | TRAJ19    | -1.597086984 | 0.0007 |
| ENSG00000211858  | TRAJ31    | -2.124238687 | 0.0018 |
| ENSG00000115993  | TRAK2     | -1.084387875 | 5E-06  |
| ENSG00000184811  | TRARG1    | -5.844892345 | 2E-12  |
| ENSG00000211829  | TRDC      | -1.810667511 | 0.0002 |
| ENSG00000186439  | TRDN      | -4.446867619 | 7E-11  |



|                 |         |              |        |
|-----------------|---------|--------------|--------|
| ENSG00000124731 | TREM1   | 2.624672997  | 0.0021 |
| ENSG00000095970 | TREM2   | -2.642306705 | 3E-13  |
| ENSG00000112195 | TREML2  | 3.482317654  | 0.0001 |
| ENSG00000183479 | TREX2   | 2.91030328   | 8E-14  |
| ENSG00000072657 | TRHDE   | -1.769840444 | 2E-08  |
| ENSG00000101255 | TRIB3   | 1.638004487  | 1E-09  |
| ENSG00000204613 | TRIM10  | 2.058257107  | 0.0019 |
| ENSG00000204610 | TRIM15  | 4.082453669  | 6E-07  |
| ENSG00000221926 | TRIM16  | 1.065060521  | 7E-08  |
| ENSG00000109654 | TRIM2   | -1.426122559 | 9E-08  |
| ENSG00000137699 | TRIM29  | 1.208187934  | 8E-08  |
| ENSG00000183718 | TRIM52  | -1.147780476 | 4E-06  |
| ENSG00000213186 | TRIM59  | 1.051060529  | 9E-05  |
| ENSG00000116525 | TRIM62  | 1.21288129   | 8E-08  |
| ENSG00000177238 | TRIM72  | 2.21231763   | 1E-07  |
| ENSG00000171206 | TRIM8   | -1.140264655 | 3E-12  |
| ENSG00000100505 | TRIM9   | -1.925355776 | 3E-05  |
| ENSG00000071539 | TRIP13  | 1.705168715  | 3E-06  |
| ENSG00000250305 | TRMT9B  | -1.659612174 | 1E-05  |
| ENSG00000135451 | TROAP   | 1.01593153   | 0.0004 |
| ENSG00000144935 | TRPC1   | -1.430663983 | 8E-08  |
| ENSG00000142185 | TRPM2   | -1.378004771 | 3E-05  |
| ENSG00000083067 | TRPM3   | -2.559578916 | 0.0043 |
| ENSG00000167723 | TRPV3   | 1.739635359  | 5E-16  |
| ENSG00000111199 | TRPV4   | -1.052091272 | 1E-06  |
| ENSG00000165125 | TRPV6   | -1.322309384 | 0.0008 |
| ENSG00000157514 | TSC22D3 | -1.579908047 | 3E-19  |
| ENSG00000165409 | TSHR    | -2.334268336 | 0.004  |
| ENSG00000117472 | TSPAN1  | -1.766819678 | 4E-08  |
| ENSG00000106025 | TSPAN12 | -1.494019346 | 3E-07  |
| ENSG00000099282 | TSPAN15 | -1.666014752 | 2E-11  |
| ENSG00000157570 | TSPAN18 | -1.083866431 | 4E-05  |
| ENSG00000134198 | TSPAN2  | -1.082658907 | 2E-05  |
| ENSG00000064201 | TSPAN32 | -2.016671902 | 0.0017 |
| ENSG00000214063 | TSPAN4  | -1.176762371 | 6E-13  |
| ENSG00000168785 | TSPAN5  | 1.288975399  | 1E-10  |
| ENSG00000156298 | TSPAN7  | -1.738643617 | 6E-10  |
| ENSG00000127324 | TSPAN8  | -3.716440918 | 7E-16  |
| ENSG00000005379 | TSPOAP1 | -1.502370655 | 4E-06  |
| ENSG00000184205 | TSPYL2  | -1.366131879 | 2E-10  |
| ENSG00000180543 | TSPYL5  | -1.505159842 | 4E-21  |
| ENSG00000162526 | TSSK3   | -2.181077044 | 0.0349 |
| ENSG00000104522 | TSTA3   | 1.603783426  | 4E-11  |
| ENSG00000006555 | TTC22   | 2.069293514  | 2E-14  |
| ENSG00000204815 | TTC25   | -1.267044275 | 0.0039 |
| ENSG00000100154 | TTC28   | -1.529505299 | 9E-11  |
| ENSG00000215912 | TTC34   | -2.085887131 | 0.0001 |
| ENSG00000172425 | TTC36   | -2.761155784 | 0.0008 |

|                 |         |              |        |
|-----------------|---------|--------------|--------|
| ENSG00000085831 | TTC39A  | 2.331716147  | 2E-34  |
| ENSG00000155158 | TTC39B  | 1.177845262  | 1E-10  |
| ENSG00000139865 | TTC6    | -3.650345633 | 4E-11  |
| ENSG00000133985 | TTC9    | 1.293799951  | 5E-06  |
| ENSG00000112742 | TTK     | 1.902153613  | 2E-08  |
| ENSG00000162571 | TLL10   | -1.900627063 | 0.0273 |
| ENSG00000155657 | TTN     | -1.421808802 | 0.0002 |
| ENSG00000137561 | TTPA    | -3.627032889 | 7E-10  |
| ENSG00000118271 | TTR     | 2.904396772  | 0.0468 |
| ENSG00000167614 | TTYH1   | -2.98550511  | 6E-23  |
| ENSG00000166402 | TUB     | -1.115759046 | 0.0001 |
| ENSG00000167553 | TUBA1C  | 2.459077713  | 1E-14  |
| ENSG00000127824 | TUBA4A  | 2.415376363  | 8E-13  |
| ENSG00000101162 | TUBB1   | -2.82555139  | 0.0009 |
| ENSG00000137267 | TUBB2A  | 2.084364284  | 3E-08  |
| ENSG00000258947 | TUBB3   | 4.459733393  | 7E-06  |
| ENSG00000188229 | TUBB4B  | 1.117763028  | 0.0003 |
| ENSG00000176014 | TUBB6   | 1.031824984  | 0.0005 |
| ENSG00000131462 | TUBG1   | 1.410539679  | 2E-08  |
| ENSG00000151239 | TWF1    | 1.624678086  | 4E-11  |
| ENSG00000136810 | TXN     | 2.291476692  | 9E-17  |
| ENSG00000129235 | TXNDC17 | 1.996195242  | 5E-13  |
| ENSG00000239264 | TXNDC5  | 2.516911791  | 0.0235 |
| ENSG00000115514 | TXNDC9  | 1.192919408  | 2E-07  |
| ENSG00000265972 | TXNIP   | -1.788180066 | 7E-27  |
| ENSG00000025708 | TYMP    | 2.029596375  | 2E-12  |
| ENSG00000176890 | TYMS    | 1.244683325  | 2E-05  |
| ENSG00000077498 | TYR     | 2.033668181  | 2E-07  |
| ENSG00000107165 | TYRP1   | 1.751603121  | 5E-07  |
| ENSG00000185262 | UBALD2  | 1.128367459  | 4E-08  |
| ENSG00000246922 | UBAP1L  | -1.405245273 | 5E-05  |
| ENSG00000154127 | UBASH3B | 1.646730217  | 1E-11  |
| ENSG00000175063 | UBE2C   | 1.569213055  | 0.0001 |
| ENSG00000184182 | UBE2F   | 1.132366728  | 9E-08  |
| ENSG00000177889 | UBE2N   | 1.002213188  | 7E-05  |
| ENSG00000077152 | UBE2T   | 1.274790089  | 0.0002 |
| ENSG00000154277 | UCHL1   | -1.853830681 | 5E-09  |
| ENSG00000118939 | UCHL3   | 1.473247686  | 9E-07  |
| ENSG00000175567 | UCP2    | -1.461306916 | 1E-07  |
| ENSG00000175564 | UCP3    | -1.032930617 | 0.0086 |
| ENSG00000148154 | UGCG    | 1.324985381  | 7E-13  |
| ENSG00000244122 | UGT1A7  | 4.112099543  | 1E-20  |
| ENSG00000213759 | UGT2B11 | -3.033274506 | 0.0042 |
| ENSG00000171234 | UGT2B7  | -2.22751214  | 0.0026 |
| ENSG00000168671 | UGT3A2  | -2.663901409 | 9E-06  |
| ENSG00000174607 | UGT8    | -2.13187239  | 1E-09  |
| ENSG00000276043 | UHRF1   | 1.867722447  | 8E-08  |
| ENSG00000111981 | ULBP1   | 3.03199488   | 0.0002 |

|                 |         |              |        |
|-----------------|---------|--------------|--------|
| ENSG00000131015 | ULBP2   | 5.591207597  | 2E-10  |
| ENSG00000131019 | ULBP3   | 2.070978348  | 2E-05  |
| ENSG00000137766 | UNC13C  | -2.721341819 | 0.0002 |
| ENSG00000092929 | UNC13D  | 1.327965766  | 2E-05  |
| ENSG00000107731 | UNC5B   | 1.351686698  | 1E-08  |
| ENSG00000182168 | UNC5C   | -2.645793217 | 3E-17  |
| ENSG00000156687 | UNC5D   | -2.538534281 | 0.003  |
| ENSG00000144406 | UNC80   | -2.307522411 | 0.0013 |
| ENSG00000112494 | UNC93A  | 4.019246344  | 3E-08  |
| ENSG00000100024 | UPB1    | -1.273379974 | 0.0213 |
| ENSG00000105668 | UPK1A   | 3.076583012  | 3E-05  |
| ENSG00000243566 | UPK3B   | -1.416233991 | 4E-06  |
| ENSG00000183696 | UPP1    | 2.139881447  | 0.0002 |
| ENSG00000182040 | USH1G   | 2.093537025  | 1E-07  |
| ENSG00000130307 | USHBP1  | -1.273772493 | 8E-08  |
| ENSG00000058056 | USP13   | -1.186079447 | 4E-08  |
| ENSG00000036672 | USP2    | 1.758504378  | 9E-10  |
| ENSG00000170185 | USP38   | 1.006641919  | 5E-06  |
| ENSG00000136014 | USP44   | -1.881940358 | 4E-12  |
| ENSG00000247746 | USP51   | -1.032499163 | 0.0007 |
| ENSG00000129204 | USP6    | -2.528780031 | 3E-07  |
| ENSG00000183520 | UTP11   | 1.096333333  | 2E-10  |
| ENSG00000188958 | UTS2B   | -2.25164381  | 0.0092 |
| ENSG00000171724 | VAT1L   | -1.310170659 | 0.0078 |
| ENSG00000116035 | VAX2    | -1.766078043 | 6E-05  |
| ENSG00000162692 | VCAM1   | -1.202216026 | 0.0005 |
| ENSG00000038427 | VCAN    | -1.298783635 | 0.0014 |
| ENSG00000165280 | VCP     | 1.001451523  | 9E-06  |
| ENSG00000165197 | VEGFD   | -3.096149253 | 3E-08  |
| ENSG00000151650 | VENTX   | -1.176558026 | 0.0011 |
| ENSG00000128564 | VGf     | 2.335001373  | 0.0114 |
| ENSG00000206538 | VGLL3   | -2.099927521 | 3E-10  |
| ENSG00000026025 | VIM     | -1.47564137  | 4E-12  |
| ENSG00000106018 | VIPR2   | -1.901818798 | 0.0007 |
| ENSG00000205221 | VIT     | -1.423062458 | 1E-06  |
| ENSG00000062716 | VMP1    | 1.231851414  | 1E-08  |
| ENSG00000093134 | VNN3    | 5.497238784  | 2E-11  |
| ENSG00000176428 | VPS37D  | -1.06444504  | 0.0067 |
| ENSG00000101842 | VSIG1   | 1.777711881  | 0.0003 |
| ENSG00000186806 | VSIG10L | 1.015401359  | 0.001  |
| ENSG00000019102 | VSIG2   | -1.608078334 | 4E-07  |
| ENSG00000155659 | VSIG4   | -2.27235444  | 3E-06  |
| ENSG00000163032 | VSNL1   | 1.543732501  | 1E-07  |
| ENSG00000134258 | VTCN1   | -2.928639115 | 2E-14  |
| ENSG00000175267 | VWA3A   | 2.52120426   | 3E-08  |
| ENSG00000167992 | VWCE    | -1.411620286 | 0.0008 |
| ENSG00000146530 | VWDE    | -1.550971483 | 0.0269 |
| ENSG00000110799 | VWF     | -1.527903896 | 1E-13  |

|                 |         |              |        |
|-----------------|---------|--------------|--------|
| ENSG00000169085 | VXN     | -2.146686661 | 0.001  |
| ENSG00000132970 | WASF3   | -1.47190941  | 5E-10  |
| ENSG00000183066 | WBP2NL  | -1.61427933  | 9E-08  |
| ENSG00000143951 | WDPCP   | -1.201559352 | 1E-06  |
| ENSG00000150627 | WDR17   | -2.470449012 | 2E-08  |
| ENSG00000185798 | WDR53   | 1.660690533  | 4E-11  |
| ENSG00000126870 | WDR60   | -1.111598002 | 0.0003 |
| ENSG00000075702 | WDR62   | 1.481260517  | 8E-07  |
| ENSG00000158023 | WDR66   | 1.738259633  | 3E-08  |
| ENSG00000166415 | WDR72   | -3.04094893  | 1E-18  |
| ENSG00000152763 | WDR78   | -1.080112341 | 9E-05  |
| ENSG00000187260 | WDR86   | -2.173641215 | 0.0002 |
| ENSG00000140527 | WDR93   | -1.552942972 | 2E-05  |
| ENSG00000182931 | WFDC10B | -3.507587824 | 2E-06  |
| ENSG00000168703 | WFDC12  | 4.810480585  | 3E-12  |
| ENSG00000101443 | WFDC2   | -1.817779799 | 6E-07  |
| ENSG00000124116 | WFDC3   | -3.173562536 | 1E-20  |
| ENSG00000175121 | WFDC5   | 1.819911384  | 3E-07  |
| ENSG00000173714 | WFIKKN2 | -3.396286261 | 6E-06  |
| ENSG00000109501 | WFS1    | -1.267302323 | 2E-08  |
| ENSG00000095397 | WHRN    | -1.25425805  | 7E-06  |
| ENSG00000156076 | WIF1    | -2.957461679 | 9E-06  |
| ENSG00000122574 | WIPF3   | -1.357953708 | 9E-09  |
| ENSG00000104415 | WISP1   | 1.224241573  | 0.0134 |
| ENSG00000064205 | WISP2   | -2.847812838 | 3E-12  |
| ENSG00000112761 | WISP3   | 1.039978575  | 0.0426 |
| ENSG00000165238 | WNK2    | -2.865946358 | 6E-11  |
| ENSG00000085741 | WNT11   | -2.062641731 | 4E-26  |
| ENSG00000002745 | WNT16   | 1.037602293  | 0.0002 |
| ENSG00000105989 | WNT2    | -2.115524496 | 3E-05  |
| ENSG00000108379 | WNT3    | 1.447156851  | 5E-09  |
| ENSG00000162552 | WNT4    | 1.233780606  | 5E-06  |
| ENSG00000114251 | WNT5A   | 2.33792706   | 1E-25  |
| ENSG00000111186 | WNT5B   | -1.258459924 | 3E-07  |
| ENSG00000115596 | WNT6    | -1.550486786 | 0.0085 |
| ENSG00000154764 | WNT7A   | 2.571499428  | 1E-09  |
| ENSG00000179314 | WSCD1   | -2.423272901 | 1E-10  |
| ENSG00000075035 | WSCD2   | -2.125814263 | 3E-12  |
| ENSG00000142279 | WTIP    | -1.447028986 | 1E-16  |
| ENSG00000155622 | XAGE2   | -2.680444324 | 0.0038 |
| ENSG00000158125 | XDH     | 1.39426125   | 0.0008 |
| ENSG00000047597 | XK      | 1.248938487  | 0.0015 |
| ENSG00000206579 | XKR4    | -2.145567396 | 3E-06  |
| ENSG00000182489 | XKRX    | 2.697087962  | 3E-15  |
| ENSG00000154767 | XPC     | -1.034883974 | 0.0002 |
| ENSG00000122121 | XPNPEP2 | -2.509958764 | 4E-10  |
| ENSG00000134684 | YARS    | 1.238177536  | 3E-18  |
| ENSG00000006047 | YBX2    | -2.62739969  | 5E-17  |

|                 |          |              |        |
|-----------------|----------|--------------|--------|
| ENSG00000250067 | YJEFN3   | -1.081553314 | 0.0055 |
| ENSG00000180667 | YOD1     | 2.391634289  | 2E-23  |
| ENSG00000100027 | YPEL1    | -1.817076038 | 3E-09  |
| ENSG00000166793 | YPEL4    | -1.620145393 | 3E-08  |
| ENSG00000134308 | YWHAQ    | 1.169326789  | 9E-05  |
| ENSG00000164924 | YWHAZ    | 1.715688202  | 2E-12  |
| ENSG00000146839 | ZAN      | 1.429174582  | 0.0205 |
| ENSG00000177494 | ZBED2    | 3.037769425  | 8E-17  |
| ENSG00000132846 | ZBED3    | -1.473567645 | 1E-09  |
| ENSG00000188707 | ZBED6CL  | 1.601218738  | 2E-15  |
| ENSG00000205189 | ZBTB10   | -1.990876744 | 5E-10  |
| ENSG00000109906 | ZBTB16   | -3.59631261  | 5E-21  |
| ENSG00000181722 | ZBTB20   | -1.734028181 | 2E-09  |
| ENSG00000114853 | ZBTB47   | -1.226489432 | 3E-08  |
| ENSG00000119703 | ZC2HC1C  | -1.141591175 | 9E-05  |
| ENSG00000163874 | ZC3H12A  | 1.058069941  | 0.0005 |
| ENSG00000102053 | ZC3H12B  | -2.468777615 | 0.0004 |
| ENSG00000188177 | ZC3H6    | -1.736590472 | 3E-07  |
| ENSG00000141664 | ZCCHC2   | -1.125250576 | 2E-07  |
| ENSG00000165424 | ZCCHC24  | -1.436892087 | 2E-11  |
| ENSG00000078487 | ZCWPW1   | -1.705796745 | 8E-07  |
| ENSG00000188818 | ZDHHC11  | -1.999782885 | 5E-05  |
| ENSG00000206077 | ZDHHC11B | -2.879991423 | 7E-06  |
| ENSG00000102383 | ZDHHC15  | -1.932462074 | 2E-11  |
| ENSG00000104219 | ZDHHC2   | -1.629755649 | 3E-08  |
| ENSG00000175893 | ZDHHC21  | 1.251247374  | 2E-08  |
| ENSG00000148516 | ZEB1     | -1.404362416 | 3E-05  |
| ENSG00000169554 | ZEB2     | -1.302466696 | 4E-07  |
| ENSG00000140836 | ZFHX3    | -1.009620841 | 1E-06  |
| ENSG00000091656 | ZFHX4    | -2.186589368 | 2E-11  |
| ENSG00000142065 | ZFP14    | -1.421566669 | 2E-06  |
| ENSG00000198939 | ZFP2     | -1.471845446 | 5E-05  |
| ENSG00000196867 | ZFP28    | -1.487296981 | 6E-16  |
| ENSG00000128016 | ZFP36    | 1.193133672  | 2E-05  |
| ENSG00000136866 | ZFP37    | -1.010298527 | 0.0137 |
| ENSG00000187801 | ZFP69B   | 1.284803928  | 0.018  |
| ENSG00000181007 | ZFP82    | -1.075205299 | 8E-06  |
| ENSG00000169946 | ZFPM2    | -2.005716926 | 2E-09  |
| ENSG00000162078 | ZG16B    | -1.290267887 | 4E-09  |
| ENSG00000152977 | ZIC1     | -1.527918778 | 0.0015 |
| ENSG00000043355 | ZIC2     | 2.362171397  | 0.0048 |
| ENSG00000174963 | ZIC4     | -2.0376103   | 9E-06  |
| ENSG00000171649 | ZIK1     | -1.231810599 | 2E-07  |
| ENSG00000166432 | ZMAT1    | -2.567557625 | 2E-13  |
| ENSG00000165061 | ZMAT4    | -3.28119771  | 0.0143 |
| ENSG00000066185 | ZMYND12  | -1.344324972 | 0.0097 |
| ENSG00000176293 | ZNF135   | -2.263630317 | 5E-14  |
| ENSG00000105708 | ZNF14    | -1.034660057 | 3E-09  |

|                 |         |              |        |
|-----------------|---------|--------------|--------|
| ENSG00000179909 | ZNF154  | -1.187051808 | 3E-05  |
| ENSG00000197279 | ZNF165  | 1.748848372  | 2E-05  |
| ENSG00000147394 | ZNF185  | 1.719746417  | 8E-08  |
| ENSG00000160321 | ZNF208  | -1.860749237 | 0.0017 |
| ENSG00000149050 | ZNF214  | -1.392237755 | 0.0032 |
| ENSG00000149054 | ZNF215  | 1.473378332  | 0.0001 |
| ENSG00000159905 | ZNF221  | -1.13758193  | 0.0008 |
| ENSG00000167377 | ZNF23   | -1.00663606  | 0.0332 |
| ENSG00000196793 | ZNF239  | -1.409817232 | 2E-05  |
| ENSG00000175395 | ZNF25   | -1.099045118 | 2E-11  |
| ENSG00000256771 | ZNF253  | -1.009549545 | 3E-07  |
| ENSG00000197134 | ZNF257  | -1.398345594 | 0.0007 |
| ENSG00000182986 | ZNF320  | -1.651185893 | 0.0198 |
| ENSG00000198185 | ZNF334  | -1.028508006 | 0.0005 |
| ENSG00000197937 | ZNF347  | -1.139998218 | 1E-11  |
| ENSG00000138311 | ZNF365  | 1.09144441   | 0.0496 |
| ENSG00000161298 | ZNF382  | -1.484944145 | 3E-05  |
| ENSG00000144331 | ZNF385B | -1.870076635 | 3E-05  |
| ENSG00000187595 | ZNF385C | -1.74230251  | 8E-06  |
| ENSG00000151789 | ZNF385D | -1.32870494  | 8E-05  |
| ENSG00000186496 | ZNF396  | -1.181268234 | 9E-05  |
| ENSG00000170954 | ZNF415  | -1.660230209 | 3E-22  |
| ENSG00000196724 | ZNF418  | -1.454676861 | 2E-07  |
| ENSG00000102935 | ZNF423  | -1.872273417 | 2E-09  |
| ENSG00000198521 | ZNF43   | -1.437328943 | 8E-08  |
| ENSG00000178187 | ZNF454  | -1.139306093 | 0.0002 |
| ENSG00000196263 | ZNF471  | -1.75814352  | 2E-12  |
| ENSG00000173258 | ZNF483  | -1.766761056 | 2E-06  |
| ENSG00000196268 | ZNF493  | -1.006072322 | 0.0003 |
| ENSG00000186446 | ZNF501  | -1.022067968 | 1E-05  |
| ENSG00000175322 | ZNF519  | -1.153178707 | 2E-06  |
| ENSG00000198795 | ZNF521  | -1.386635525 | 1E-05  |
| ENSG00000167555 | ZNF528  | -1.486832129 | 1E-09  |
| ENSG00000171817 | ZNF540  | -1.200550969 | 0.001  |
| ENSG00000118156 | ZNF541  | -2.222248848 | 2E-07  |
| ENSG00000187187 | ZNF546  | -1.625652917 | 3E-08  |
| ENSG00000188321 | ZNF559  | -1.129128833 | 2E-09  |
| ENSG00000161551 | ZNF577  | -1.672980252 | 3E-10  |
| ENSG00000258405 | ZNF578  | -1.940142831 | 0.0002 |
| ENSG00000018869 | ZNF582  | -1.178886906 | 0.0001 |
| ENSG00000198440 | ZNF583  | -1.251359932 | 8E-06  |
| ENSG00000142684 | ZNF593  | 1.144833138  | 2E-05  |
| ENSG00000196458 | ZNF605  | -1.214116784 | 0.0004 |
| ENSG00000168916 | ZNF608  | -1.16440988  | 7E-05  |
| ENSG00000167554 | ZNF610  | -2.034918557 | 1E-10  |
| ENSG00000157657 | ZNF618  | -1.012333868 | 0.0005 |
| ENSG00000177842 | ZNF620  | -1.0806899   | 3E-05  |
| ENSG00000182983 | ZNF662  | 1.269049603  | 3E-18  |

|                 |         |              |        |
|-----------------|---------|--------------|--------|
| ENSG00000197497 | ZNF665  | -1.807525154 | 1E-10  |
| ENSG00000198046 | ZNF667  | -2.046448243 | 3E-09  |
| ENSG00000083814 | ZNF671  | -1.027134061 | 3E-07  |
| ENSG00000196109 | ZNF676  | -2.389994343 | 8E-06  |
| ENSG00000197928 | ZNF677  | -1.635957193 | 9E-14  |
| ENSG00000198429 | ZNF69   | -1.562916587 | 1E-05  |
| ENSG00000164684 | ZNF704  | -1.440564618 | 2E-06  |
| ENSG00000120963 | ZNF706  | 1.201535142  | 2E-11  |
| ENSG00000140548 | ZNF710  | 1.247319067  | 2E-11  |
| ENSG00000147180 | ZNF711  | -1.167192852 | 8E-05  |
| ENSG00000214652 | ZNF727  | -2.398512464 | 1E-04  |
| ENSG00000141579 | ZNF750  | 1.592805846  | 2E-06  |
| ENSG00000197054 | ZNF763  | -1.189116272 | 0.0008 |
| ENSG00000198146 | ZNF770  | 1.366842893  | 6E-17  |
| ENSG00000188227 | ZNF793  | -1.142962483 | 0.0001 |
| ENSG00000167766 | ZNF83   | -1.243615084 | 5E-15  |
| ENSG00000127903 | ZNF835  | -1.996371424 | 0.0007 |
| ENSG00000223547 | ZNF844  | -1.053230298 | 3E-06  |
| ENSG00000236609 | ZNF853  | -2.367561083 | 4E-14  |
| ENSG00000106479 | ZNF862  | -1.02976938  | 8E-06  |
| ENSG00000257446 | ZNF878  | 3.394946483  | 8E-05  |
| ENSG00000213973 | ZNF99   | -2.443331935 | 0.0417 |
| ENSG00000180233 | ZNRF2   | 1.151168209  | 2E-06  |
| ENSG00000121413 | ZSCAN18 | -2.217941919 | 4E-14  |
| ENSG00000187987 | ZSCAN23 | -1.439472503 | 0.0133 |
| ENSG00000235109 | ZSCAN31 | 1.18759771   | 6E-14  |
| ENSG00000180532 | ZSCAN4  | -2.456074579 | 0.0386 |
| ENSG00000132003 | ZSWIM4  | 1.085427779  | 1E-07  |
| ENSG00000162415 | ZSWIM5  | -1.14002282  | 0.0001 |
| ENSG00000174442 | ZWILCH  | 1.122633676  | 2E-14  |
| ENSG00000122952 | ZWINT   | 1.4306765    | 3E-09  |
| ENSG00000203995 | ZYG11A  | 2.713515695  | 6E-07  |





Table

S5: Full

| GeneID          | GeneName   | logFC (PN_Lesional / Healthy_Control) | padj     |
|-----------------|------------|---------------------------------------|----------|
| ENSG00000121410 | A1BG       | -2.715435796                          | 0.008843 |
| ENSG00000175899 | A2M        | -1.377158318                          | 1.43E-08 |
| ENSG00000166535 | A2ML1      | 2.810661375                           | 2.6E-24  |
| ENSG00000128274 | A4GALT     | -1.573435042                          | 2.27E-07 |
| ENSG00000114771 | AADAC      | 2.595391034                           | 7.07E-06 |
| ENSG00000197953 | AADACL2    | 1.951336388                           | 4.45E-12 |
| ENSG00000109576 | AADAT      | -1.254144867                          | 2.9E-05  |
| ENSG00000087884 | AAMDC      | -1.258397014                          | 4.03E-11 |
| ENSG00000205002 | AARD       | -1.862947229                          | 8.92E-05 |
| ENSG00000183044 | ABAT       | -1.446893035                          | 5.84E-07 |
| ENSG00000154263 | ABCA10     | -1.829101352                          | 1.24E-06 |
| ENSG00000144452 | ABCA12     | 2.748538667                           | 4.4E-28  |
| ENSG00000107331 | ABCA2      | -1.744826228                          | 8.6E-09  |
| ENSG00000167972 | ABCA3      | -1.948031519                          | 8.86E-15 |
| ENSG00000154262 | ABCA6      | -2.121239957                          | 1.76E-08 |
| ENSG00000141338 | ABCA8      | -2.711575432                          | 2.83E-11 |
| ENSG00000154258 | ABCA9      | -3.136837771                          | 1.18E-11 |
| ENSG00000073734 | ABCB11     | -2.822785128                          | 1.85E-08 |
| ENSG00000005471 | ABCB4      | -1.476647796                          | 0.001164 |
| ENSG00000091262 | ABCC6      | -3.710550629                          | 2.85E-14 |
| ENSG00000069431 | ABCC9      | -1.714328654                          | 5.35E-08 |
| ENSG00000173208 | ABCD2      | -3.50208718                           | 3.55E-05 |
| ENSG00000160179 | ABCG1      | 1.169604371                           | 0.000296 |
| ENSG00000172350 | ABCG4      | 6.31137008                            | 4.76E-31 |
| ENSG00000143994 | ABHD1      | -2.446048836                          | 0.000133 |
| ENSG00000136379 | ABHD17C    | 1.377006406                           | 9.09E-09 |
| ENSG00000154175 | ABI3BP     | -1.889778962                          | 2.82E-07 |
| ENSG00000173210 | ABLIM3     | -1.562992639                          | 1.3E-05  |
| ENSG00000175164 | ABO        | -1.798885106                          | 3.87E-08 |
| ENSG00000284292 | AC004922.1 | 2.923489084                           | 0.029222 |
| ENSG00000251537 | AC005324.3 | 3.415893586                           | 0.001374 |
| ENSG00000258881 | AC007040.2 | -3.154211358                          | 0.002724 |
| ENSG00000277196 | AC007325.2 | -1.763995122                          | 0.004475 |
| ENSG00000278817 | AC007325.4 | -1.332849708                          | 0.027241 |
| ENSG00000277639 | AC007906.2 | -1.423924014                          | 0.001692 |
| ENSG00000258311 | AC009779.3 | -1.778566396                          | 0.004839 |
| ENSG00000268041 | AC010616.1 | -2.69141422                           | 0.043154 |
| ENSG00000230626 | AC011005.1 | 1.79382977                            | 0.00967  |
| ENSG00000269741 | AC011473.4 | 6.61868997                            | 1.18E-14 |
| ENSG00000279765 | AC013394.1 | -1.240885013                          | 0.001932 |
| ENSG00000267216 | AC020915.1 | 2.52409924                            | 0.033225 |
| ENSG00000262304 | AC027796.3 | -1.967516287                          | 0.005013 |
| ENSG00000284946 | AC068831.7 | 2.059389153                           | 0.016327 |
| ENSG00000280537 | AC068946.1 | 2.943579749                           | 0.020736 |
| ENSG00000284690 | AC079325.2 | 3.128529232                           | 0.024294 |
| ENSG00000267127 | AC090360.1 | -3.413040502                          | 3.38E-07 |
| ENSG00000282034 | AC106886.5 | 1.573844372                           | 0.00023  |

|                 |            |              |          |
|-----------------|------------|--------------|----------|
| ENSG00000273238 | AC116565.1 | -2.214944676 | 6.64E-05 |
| ENSG00000271254 | AC240274.1 | -1.295375029 | 0.000353 |
| ENSG00000076555 | ACACB      | -2.665303158 | 2.36E-12 |
| ENSG00000115361 | ACADL      | -2.656719785 | 3.78E-09 |
| ENSG00000117054 | ACADM      | -1.024262747 | 0.000672 |
| ENSG00000196177 | ACADSB     | -1.210059487 | 9.51E-06 |
| ENSG00000181513 | ACBD4      | -1.201799114 | 1.33E-06 |
| ENSG00000110455 | ACCS       | -1.196568647 | 0.000335 |
| ENSG00000159640 | ACE        | -1.054061863 | 0.023081 |
| ENSG00000167769 | ACER1      | 2.382561169  | 9.05E-17 |
| ENSG00000087085 | ACHE       | -2.238554806 | 6.18E-05 |
| ENSG00000213088 | ACKR1      | -1.842739649 | 5.41E-08 |
| ENSG00000129048 | ACKR4      | 1.12961321   | 0.00156  |
| ENSG00000122729 | ACO1       | -1.821297733 | 3.31E-11 |
| ENSG00000184227 | ACOT1      | -1.734859323 | 0.00012  |
| ENSG00000119673 | ACOT2      | -1.737526727 | 1.73E-11 |
| ENSG00000177465 | ACOT4      | -1.336797087 | 5.97E-06 |
| ENSG00000097021 | ACOT7      | 1.5642202    | 7.67E-08 |
| ENSG00000168306 | ACOX2      | -2.601928833 | 4.44E-16 |
| ENSG00000087008 | ACOX3      | 1.296346826  | 7.71E-07 |
| ENSG00000102575 | ACP5       | 2.05641854   | 6.45E-13 |
| ENSG00000162836 | ACP6       | -1.15849325  | 2.44E-05 |
| ENSG00000183760 | ACP7       | 4.402290718  | 2.24E-14 |
| ENSG00000014257 | ACPP       | 2.195280471  | 1.95E-17 |
| ENSG00000100312 | ACR        | -2.458229763 | 0.000278 |
| ENSG00000111644 | ACRBP      | -1.552595266 | 0.025581 |
| ENSG00000134940 | ACRV1      | 3.169089704  | 0.000321 |
| ENSG00000167107 | ACSF2      | -1.180950929 | 2.98E-05 |
| ENSG00000151726 | ACSL1      | -1.037318855 | 0.000155 |
| ENSG00000197142 | ACSL5      | -1.424747592 | 3.32E-06 |
| ENSG00000166743 | ACSM1      | -1.469020591 | 0.036093 |
| ENSG00000005187 | ACSM3      | -1.340283259 | 0.015878 |
| ENSG00000183549 | ACSM5      | -3.291485885 | 7.24E-11 |
| ENSG00000111058 | ACSS3      | -2.882779369 | 1.55E-18 |
| ENSG00000143632 | ACTA1      | -3.153885315 | 8.85E-05 |
| ENSG00000107796 | ACTA2      | -2.252678465 | 3.87E-11 |
| ENSG00000159251 | ACTC1      | -2.401940626 | 0.001026 |
| ENSG00000163017 | ACTG2      | -2.228876364 | 1.59E-06 |
| ENSG00000182584 | ACTL10     | 2.108660874  | 0.000164 |
| ENSG00000115091 | ACTR3      | 1.353540026  | 3.87E-06 |
| ENSG00000106526 | ACTR3C     | 1.407623136  | 0.000467 |
| ENSG00000184378 | ACTRT3     | 1.862885313  | 9.61E-05 |
| ENSG00000123612 | ACVR1C     | -2.268290575 | 2.4E-06  |
| ENSG00000139567 | ACVRL1     | -1.100714162 | 0.005275 |
| ENSG00000132744 | ACY3       | 3.592853947  | 0.012713 |
| ENSG00000008277 | ADAM22     | -2.818139374 | 1.47E-07 |
| ENSG00000114948 | ADAM23     | 3.02511077   | 1.13E-18 |
| ENSG00000042980 | ADAM28     | -1.787654224 | 4.77E-05 |

|                 |           |              |          |
|-----------------|-----------|--------------|----------|
| ENSG00000197140 | ADAM32    | -1.737658446 | 0.002159 |
| ENSG00000149451 | ADAM33    | -1.724049066 | 8.4E-05  |
| ENSG00000134028 | ADAMDEC1  | 4.631260007  | 8.71E-08 |
| ENSG00000142303 | ADAMTS10  | -1.788575529 | 3.46E-05 |
| ENSG00000138316 | ADAMTS14  | 1.772734485  | 0.003747 |
| ENSG00000158859 | ADAMTS4   | 1.37885038   | 0.002384 |
| ENSG00000154736 | ADAMTS5   | -1.541461567 | 0.000135 |
| ENSG00000136378 | ADAMTS7   | 1.330281743  | 0.002155 |
| ENSG00000156218 | ADAMTSL3  | -2.543712725 | 9.06E-31 |
| ENSG00000185761 | ADAMTSL5  | 1.6927074    | 0.011131 |
| ENSG00000184060 | ADAP2     | 2.986884186  | 9.35E-28 |
| ENSG00000164742 | ADCY1     | -1.289427168 | 9.17E-06 |
| ENSG00000078295 | ADCY2     | -2.171087864 | 4.14E-15 |
| ENSG00000129467 | ADCY4     | -1.204526567 | 0.001754 |
| ENSG00000173175 | ADCY5     | -3.111002857 | 2.16E-21 |
| ENSG00000174233 | ADCY6     | -1.42493927  | 1.24E-06 |
| ENSG00000155897 | ADCY8     | -4.071871942 | 9.33E-08 |
| ENSG00000078549 | ADCYAP1R1 | -1.669610967 | 0.005814 |
| ENSG00000075340 | ADD2      | -1.893392978 | 3.34E-05 |
| ENSG00000148700 | ADD3      | -1.551113336 | 8.3E-12  |
| ENSG00000020181 | ADGRA2    | -1.734934395 | 4.57E-06 |
| ENSG00000121753 | ADGRB2    | -1.204745167 | 0.028628 |
| ENSG00000135298 | ADGRB3    | -1.131814617 | 0.010747 |
| ENSG00000111452 | ADGRD1    | -3.027105591 | 7.2E-08  |
| ENSG00000180264 | ADGRD2    | -1.66440503  | 0.018572 |
| ENSG00000153292 | ADGRF1    | 4.714621388  | 1.98E-08 |
| ENSG00000164393 | ADGRF2    | 2.211596009  | 4.84E-05 |
| ENSG00000153294 | ADGRF4    | 1.950327563  | 5.72E-15 |
| ENSG00000069122 | ADGRF5    | -1.171889855 | 0.000655 |
| ENSG00000173698 | ADGRG2    | -3.266699238 | 4.14E-09 |
| ENSG00000150471 | ADGRL3    | -1.059919785 | 0.00042  |
| ENSG00000164199 | ADGRV1    | -1.70245727  | 8.53E-05 |
| ENSG00000196616 | ADH1B     | -4.341885184 | 1.96E-10 |
| ENSG00000248144 | ADH1C     | -4.441738476 | 1.05E-07 |
| ENSG00000172955 | ADH6      | -2.851624353 | 0.019465 |
| ENSG00000196344 | ADH7      | 3.856845949  | 1.45E-10 |
| ENSG00000147576 | ADHFE1    | -1.596434213 | 6.23E-08 |
| ENSG00000181092 | ADIPOQ    | -4.603600689 | 1.38E-07 |
| ENSG00000148671 | ADIRF     | -1.567375561 | 1.98E-08 |
| ENSG00000128165 | ADM2      | 2.432344082  | 1.53E-06 |
| ENSG00000224420 | ADM5      | -1.038927901 | 0.001456 |
| ENSG00000163485 | ADORA1    | -3.044902562 | 8.64E-13 |
| ENSG00000144843 | ADPRH     | -1.12986977  | 0.000144 |
| ENSG00000120907 | ADRA1A    | -2.780075713 | 3.17E-06 |
| ENSG00000150594 | ADRA2A    | -2.290914    | 1.43E-09 |
| ENSG00000274286 | ADRA2B    | -1.550996143 | 0.017372 |
| ENSG00000184160 | ADRA2C    | -1.639251382 | 5.85E-08 |
| ENSG00000043591 | ADRB1     | -2.671441428 | 4.34E-12 |

|                 |            |              |          |
|-----------------|------------|--------------|----------|
| ENSG00000181026 | AEN        | 1.820689543  | 8.1E-15  |
| ENSG00000196526 | AFAP1      | -1.120532807 | 1.31E-05 |
| ENSG00000169129 | AFAP1L2    | 1.39384402   | 2.58E-18 |
| ENSG00000155966 | AFF2       | -2.034847176 | 0.00022  |
| ENSG00000144218 | AFF3       | -2.614999269 | 3.13E-09 |
| ENSG00000135439 | AGAP2      | 1.143779611  | 0.000168 |
| ENSG00000186094 | AGBL4      | -2.23637267  | 0.001224 |
| ENSG00000116771 | AGMAT      | 2.049694826  | 0.001675 |
| ENSG00000187546 | AGMO       | -1.917117492 | 0.02391  |
| ENSG00000155189 | AGPAT5     | 1.029471366  | 1.7E-06  |
| ENSG00000173467 | AGR3       | -3.536099711 | 0.022602 |
| ENSG00000135744 | AGT        | -3.230781981 | 4.28E-10 |
| ENSG00000144891 | AGTR1      | -3.485750897 | 2.9E-13  |
| ENSG00000169877 | AHSP       | -2.202822537 | 0.013099 |
| ENSG00000042286 | AIFM2      | -1.863802966 | 1.61E-08 |
| ENSG00000163568 | AIM2       | 2.426711191  | 5.25E-05 |
| ENSG00000196581 | AJAP1      | 2.057866444  | 4.43E-09 |
| ENSG00000232434 | AJM1       | -1.243209963 | 0.001042 |
| ENSG00000155085 | AK9        | -1.069602281 | 0.000655 |
| ENSG00000131016 | AKAP12     | -2.462421356 | 1.1E-16  |
| ENSG00000151320 | AKAP6      | -1.221826151 | 1.7E-05  |
| ENSG00000198074 | AKR1B10    | 6.596853621  | 5.51E-32 |
| ENSG00000227471 | AKR1B15    | 6.787813189  | 9.88E-19 |
| ENSG00000196139 | AKR1C3     | -1.473586979 | 3.06E-05 |
| ENSG00000117020 | AKT3       | -1.256653662 | 1.61E-05 |
| ENSG00000282988 | AL031777.3 | 2.325954425  | 0.015709 |
| ENSG00000284969 | AL049629.2 | -2.270805164 | 0.039183 |
| ENSG00000273259 | AL049839.2 | -3.838266557 | 0.008772 |
| ENSG00000255330 | AL096711.2 | -2.948650365 | 0.030372 |
| ENSG00000274322 | AL136531.2 | 2.686853666  | 0.008228 |
| ENSG00000285269 | AL160269.1 | -1.459221953 | 0.006796 |
| ENSG00000236782 | AL391650.1 | 2.573490424  | 0.024765 |
| ENSG00000273748 | AL592183.1 | -1.027552723 | 0.00247  |
| ENSG00000259916 | AL845331.2 | -5.685246798 | 0.000197 |
| ENSG00000158578 | ALAS2      | -2.488956878 | 0.001223 |
| ENSG00000163631 | ALB        | -2.697757513 | 0.017217 |
| ENSG00000170017 | ALCAM      | -1.678756466 | 3.87E-12 |
| ENSG00000165092 | ALDH1A1    | -1.818749496 | 4.7E-12  |
| ENSG00000128918 | ALDH1A2    | -2.259131787 | 1.13E-13 |
| ENSG00000137124 | ALDH1B1    | -2.108612537 | 3.36E-11 |
| ENSG00000144908 | ALDH1L1    | -3.128014056 | 1.52E-10 |
| ENSG00000108602 | ALDH3A1    | 1.147107852  | 6.67E-05 |
| ENSG00000159423 | ALDH4A1    | 1.401278071  | 6.37E-12 |
| ENSG00000112294 | ALDH5A1    | -1.058004388 | 2.32E-05 |
| ENSG00000119711 | ALDH6A1    | -1.583534505 | 2.69E-08 |
| ENSG00000171094 | ALK        | -2.455577032 | 0.026927 |
| ENSG00000189292 | ALKAL2     | -3.535190696 | 2.95E-11 |
| ENSG00000108839 | ALOX12     | 2.742013718  | 4.83E-19 |

|                 |           |              |          |
|-----------------|-----------|--------------|----------|
| ENSG00000179477 | ALOX12B   | 3.655739016  | 4.76E-24 |
| ENSG00000179148 | ALOXE3    | 2.453742425  | 3.97E-12 |
| ENSG00000052850 | ALX4      | -2.612702698 | 2.24E-05 |
| ENSG00000183684 | ALYREF    | 1.275485559  | 2.56E-08 |
| ENSG00000123505 | AMD1      | 1.442741744  | 7.42E-10 |
| ENSG00000181754 | AMIGO1    | -1.388771802 | 2.66E-11 |
| ENSG00000101935 | AMMECR1   | 2.276371783  | 2.45E-36 |
| ENSG00000126016 | AMOT      | -2.789145168 | 1.55E-20 |
| ENSG00000114019 | AMOTL2    | -1.163425996 | 8.61E-07 |
| ENSG00000133805 | AMPD3     | 1.283994153  | 1.39E-05 |
| ENSG00000078053 | AMPH      | -1.57671816  | 0.002147 |
| ENSG00000240038 | AMY2B     | -2.387048115 | 1.69E-09 |
| ENSG00000154188 | ANGPT1    | -2.461958269 | 1.23E-23 |
| ENSG00000101280 | ANGPT4    | -4.420683028 | 2.23E-09 |
| ENSG00000116194 | ANGPTL1   | -3.131843688 | 1.26E-09 |
| ENSG00000187151 | ANGPTL5   | -5.08535526  | 4.82E-08 |
| ENSG00000130173 | ANGPTL8   | -3.7147342   | 0.002845 |
| ENSG00000145362 | ANK2      | -2.332434489 | 1.13E-10 |
| ENSG00000151687 | ANKAR     | -1.18011542  | 0.000304 |
| ENSG00000166839 | ANKDD1A   | -1.751258501 | 1.48E-05 |
| ENSG00000189045 | ANKDD1B   | -1.657461573 | 0.023848 |
| ENSG00000180071 | ANKRD18A  | -3.3439136   | 1.6E-12  |
| ENSG00000260691 | ANKRD20A1 | -3.156773272 | 0.018943 |
| ENSG00000172014 | ANKRD20A4 | -3.010699679 | 0.003538 |
| ENSG00000152766 | ANKRD22   | 1.060912835  | 0.002595 |
| ENSG00000163126 | ANKRD23   | -1.326195679 | 0.006805 |
| ENSG00000089847 | ANKRD24   | -2.037467675 | 0.000317 |
| ENSG00000148513 | ANKRD30A  | -4.53215318  | 0.000158 |
| ENSG00000180777 | ANKRD30B  | -4.120374681 | 0.000517 |
| ENSG00000145700 | ANKRD31   | 4.510476217  | 2.02E-16 |
| ENSG00000164236 | ANKRD33B  | -1.907119737 | 5.31E-09 |
| ENSG00000135976 | ANKRD36   | -1.719589948 | 5.14E-06 |
| ENSG00000196912 | ANKRD36B  | -1.412564506 | 0.000181 |
| ENSG00000174501 | ANKRD36C  | -1.875334596 | 1.11E-07 |
| ENSG00000154945 | ANKRD40   | -1.018302365 | 2.63E-06 |
| ENSG00000144031 | ANKRD53   | -1.577402617 | 0.009707 |
| ENSG00000135299 | ANKRD6    | -1.094145371 | 0.000441 |
| ENSG00000185046 | ANKS1B    | -1.817119468 | 9.84E-06 |
| ENSG00000011426 | ANLN      | 1.644543477  | 1.58E-05 |
| ENSG00000047617 | ANO2      | -1.49659417  | 0.001542 |
| ENSG00000134343 | ANO3      | -3.281936039 | 2.95E-11 |
| ENSG00000171714 | ANO5      | -2.649734682 | 4.16E-09 |
| ENSG00000146205 | ANO7      | -1.78670859  | 0.006532 |
| ENSG00000163297 | ANTXR2    | -1.093868499 | 0.001116 |
| ENSG00000197043 | ANXA6     | -1.735225135 | 6.18E-11 |
| ENSG00000265190 | ANXA8     | 1.511525405  | 1.97E-08 |
| ENSG00000143412 | ANXA9     | 4.765875235  | 4.28E-10 |
| ENSG00000002726 | AOC1      | -2.31562872  | 6.35E-10 |

|                 |            |              |          |
|-----------------|------------|--------------|----------|
| ENSG00000131471 | AOC3       | -3.024225767 | 2.25E-18 |
| ENSG00000138356 | AOX1       | -2.283727457 | 1.51E-09 |
| ENSG00000254469 | AP002495.2 | -1.121253521 | 0.005892 |
| ENSG00000106367 | AP1S1      | 1.484992682  | 3.42E-10 |
| ENSG00000152056 | AP1S3      | 1.349407068  | 4.8E-06  |
| ENSG00000042753 | AP2S1      | 1.448120695  | 1.44E-07 |
| ENSG00000107282 | APBA1      | -2.129425732 | 1.51E-10 |
| ENSG00000166313 | APBB1      | -1.288373673 | 1.93E-06 |
| ENSG00000077420 | APBB1IP    | -2.210635831 | 1.29E-07 |
| ENSG00000101474 | APMAP      | -1.011858781 | 0.003777 |
| ENSG00000084674 | APOB       | 2.123502836  | 0.009955 |
| ENSG00000128383 | APOBEC3A   | 5.62339054   | 6.17E-12 |
| ENSG00000179750 | APOBEC3B   | 2.823246373  | 4E-06    |
| ENSG00000130208 | APOC1      | -1.914489285 | 0.000749 |
| ENSG00000189058 | APOD       | -3.595816268 | 5.56E-27 |
| ENSG00000130203 | APOE       | -1.779792216 | 1.94E-12 |
| ENSG00000128284 | APOL3      | -1.028401152 | 0.000249 |
| ENSG00000198931 | APRT       | 1.034453202  | 2.36E-07 |
| ENSG00000240583 | AQP1       | -1.522974643 | 2.96E-07 |
| ENSG00000165272 | AQP3       | 2.528803751  | 8.57E-32 |
| ENSG00000171885 | AQP4       | -3.030715971 | 0.014237 |
| ENSG00000086159 | AQP6       | -3.056836437 | 5.73E-05 |
| ENSG00000165269 | AQP7       | -3.840737239 | 2.88E-08 |
| ENSG00000103569 | AQP9       | 1.934150429  | 0.003696 |
| ENSG00000169083 | AR         | -2.598231011 | 6.82E-11 |
| ENSG00000047365 | ARAP2      | 1.286099532  | 2.16E-07 |
| ENSG00000198576 | ARC        | 2.46491725   | 0.002064 |
| ENSG00000109321 | AREG       | 2.024143495  | 3.29E-08 |
| ENSG00000165527 | ARF6       | 1.216634664  | 7.21E-11 |
| ENSG00000112379 | ARFGEF3    | -2.576086049 | 6.14E-16 |
| ENSG00000118520 | ARG1       | 5.050284532  | 4.8E-47  |
| ENSG00000081181 | ARG2       | 2.075645271  | 3.2E-06  |
| ENSG00000198826 | ARHGAP11A  | 1.134142523  | 1.87E-05 |
| ENSG00000137727 | ARHGAP20   | -2.856275311 | 1.5E-16  |
| ENSG00000031081 | ARHGAP31   | -1.004468308 | 0.000821 |
| ENSG00000006740 | ARHGAP44   | -2.074464385 | 8.16E-12 |
| ENSG00000047648 | ARHGAP6    | -2.177594665 | 4.11E-10 |
| ENSG00000242173 | ARHGDIG    | -2.721340287 | 0.011771 |
| ENSG00000104728 | ARHGEF10   | -1.763567089 | 1.56E-05 |
| ENSG00000198844 | ARHGEF15   | -1.112092298 | 0.002331 |
| ENSG00000110237 | ARHGEF17   | -1.208092572 | 4.39E-05 |
| ENSG00000116584 | ARHGEF2    | -1.007618826 | 0.000117 |
| ENSG00000240771 | ARHGEF25   | -1.681723198 | 6.85E-09 |
| ENSG00000114790 | ARHGEF26   | -1.406778613 | 9.81E-07 |
| ENSG00000236699 | ARHGEF38   | -2.654173583 | 8.55E-05 |
| ENSG00000136002 | ARHGEF4    | 1.054846218  | 2.72E-11 |
| ENSG00000165801 | ARHGEF40   | -2.019174281 | 3.97E-09 |
| ENSG00000129675 | ARHGEF6    | -2.391341466 | 1.18E-16 |

|                 |        |              |          |
|-----------------|--------|--------------|----------|
| ENSG00000032219 | ARID4A | -1.097965333 | 0.000695 |
| ENSG00000179674 | ARL14  | 4.211597552  | 5.77E-10 |
| ENSG00000185829 | ARL17A | -1.187407955 | 0.04627  |
| ENSG00000175906 | ARL4D  | 1.6136224    | 7.88E-07 |
| ENSG00000162980 | ARL5A  | 1.149252313  | 7.6E-05  |
| ENSG00000165997 | ARL5B  | 1.548887122  | 5.62E-07 |
| ENSG00000134108 | ARL8B  | 1.081584289  | 3.24E-05 |
| ENSG00000157343 | ARMC12 | -1.951641638 | 0.004969 |
| ENSG00000184867 | ARMCX2 | -1.583557864 | 3.06E-08 |
| ENSG00000102401 | ARMCX3 | -1.452143882 | 1.2E-07  |
| ENSG00000196440 | ARMCX4 | -1.121620144 | 1.05E-06 |
| ENSG00000139971 | ARMH4  | -1.2001472   | 1.69E-05 |
| ENSG00000029153 | ARNTL2 | 3.250798794  | 2.3E-26  |
| ENSG00000241685 | ARPC1A | 1.026052739  | 9.06E-08 |
| ENSG00000163466 | ARPC2  | 1.14797038   | 1.41E-09 |
| ENSG00000241553 | ARPC4  | 1.15451873   | 3.42E-10 |
| ENSG00000136950 | ARPC5L | 1.609691076  | 5.39E-14 |
| ENSG00000062096 | ARSF   | 1.908889455  | 0.000752 |
| ENSG00000205667 | ARSH   | 2.136682512  | 0.041071 |
| ENSG00000183876 | ARSI   | 1.848420854  | 7.5E-06  |
| ENSG00000111339 | ART4   | -1.648713776 | 0.030214 |
| ENSG00000117407 | ARTN   | 3.201312533  | 7.48E-07 |
| ENSG00000165192 | ASB11  | -3.438126208 | 0.000175 |
| ENSG00000100628 | ASB2   | -1.114186627 | 0.016658 |
| ENSG00000105011 | ASF1B  | 1.636224782  | 5.92E-07 |
| ENSG00000110881 | ASIC1  | -1.12711599  | 5.76E-06 |
| ENSG00000108684 | ASIC2  | -2.253913422 | 0.020921 |
| ENSG00000213199 | ASIC3  | -1.510567066 | 0.03984  |
| ENSG00000101440 | ASIP   | -4.948344822 | 1.36E-14 |
| ENSG00000108381 | ASPA   | -2.501084986 | 7.15E-16 |
| ENSG00000166183 | ASPG   | 1.715270673  | 9.48E-06 |
| ENSG00000198363 | ASPH   | -1.46087962  | 4.04E-14 |
| ENSG00000174939 | ASPHD1 | 1.503255331  | 0.037377 |
| ENSG00000128203 | ASPHD2 | 1.097140847  | 0.002568 |
| ENSG00000066279 | ASPM   | 1.282060249  | 9.07E-06 |
| ENSG00000244617 | ASPRV1 | 5.00751275   | 3.24E-21 |
| ENSG00000162174 | ASRGL1 | -1.437523994 | 4.73E-05 |
| ENSG00000188886 | ASTL   | 2.666311753  | 0.005934 |
| ENSG00000148219 | ASTN2  | -2.001236202 | 6.76E-12 |
| ENSG00000141431 | ASXL3  | -2.657436719 | 2.12E-08 |
| ENSG00000197785 | ATAD3A | 1.007225295  | 1.05E-05 |
| ENSG00000168874 | ATOH8  | -3.097668281 | 2.28E-11 |
| ENSG00000177556 | ATOX1  | 1.148089134  | 1.28E-05 |
| ENSG00000206190 | ATP10A | -1.579344923 | 6.42E-08 |
| ENSG00000118322 | ATP10B | 1.798167163  | 1.49E-13 |
| ENSG00000145246 | ATP10D | 1.574331769  | 1.93E-14 |
| ENSG00000058063 | ATP11B | 1.53016379   | 1.18E-08 |
| ENSG00000075673 | ATP12A | 3.641033215  | 0.001048 |



|                 |              |              |          |
|-----------------|--------------|--------------|----------|
| ENSG00000187527 | ATP13A5      | -2.733703829 | 2.73E-10 |
| ENSG0000018625  | ATP1A2       | -3.691533107 | 3.44E-20 |
| ENSG00000143153 | ATP1B1       | -1.760221013 | 1.6E-07  |
| ENSG00000129244 | ATP1B2       | -2.220027217 | 1.22E-06 |
| ENSG00000074370 | ATP2A3       | -2.962000598 | 5.36E-14 |
| ENSG00000157087 | ATP2B2       | -2.820567871 | 1.36E-07 |
| ENSG00000248919 | ATP5MF-PTCD1 | -1.799481531 | 0.028722 |
| ENSG00000205464 | ATP6AP1L     | -1.565151737 | 4.48E-06 |
| ENSG00000105929 | ATP6V0A4     | -2.3777796   | 2.11E-10 |
| ENSG00000185883 | ATP6V0C      | 2.813828713  | 0.038845 |
| ENSG00000159720 | ATP6V0D1     | 1.222201372  | 5.38E-07 |
| ENSG00000147614 | ATP6V0D2     | 2.549684225  | 0.047711 |
| ENSG00000171130 | ATP6V0E2     | -2.013263742 | 4.61E-15 |
| ENSG00000116039 | ATP6V1B1     | -3.083023873 | 2.24E-05 |
| ENSG00000147416 | ATP6V1B2     | 1.365726314  | 1.16E-06 |
| ENSG00000100554 | ATP6V1D      | 1.158589798  | 6.47E-06 |
| ENSG00000213760 | ATP6V1G2     | -1.509243604 | 0.036091 |
| ENSG00000124406 | ATP8A1       | -1.418436702 | 2.57E-07 |
| ENSG00000130270 | ATP8B3       | 1.556186132  | 0.016195 |
| ENSG00000104043 | ATP8B4       | -1.65878263  | 1.38E-09 |
| ENSG00000127423 | AUNIP        | 2.771026525  | 6.14E-06 |
| ENSG00000087586 | AURKA        | 2.063743439  | 3.68E-05 |
| ENSG00000178999 | AURKB        | 1.35008378   | 4.56E-06 |
| ENSG00000169857 | AVEN         | 1.609505573  | 1.07E-14 |
| ENSG00000119986 | AVPI1        | 1.075055457  | 0.000239 |
| ENSG00000126895 | AVPR2        | -1.748410542 | 0.000212 |
| ENSG00000162779 | AXDND1       | -1.465191618 | 0.010221 |
| ENSG00000167601 | AXL          | -1.42187406  | 2.16E-07 |
| ENSG00000172318 | B3GALT1      | -3.400805053 | 2.82E-05 |
| ENSG00000162630 | B3GALT2      | -1.727964816 | 0.007987 |
| ENSG00000183778 | B3GALT5      | -2.665423281 | 3.62E-06 |
| ENSG00000179913 | B3GNT3       | 2.703969441  | 2.28E-06 |
| ENSG00000176383 | B3GNT4       | 2.064383598  | 9.48E-06 |
| ENSG00000176597 | B3GNT5       | 2.538341231  | 1.35E-10 |
| ENSG00000177191 | B3GNT8       | 1.505818249  | 0.000236 |
| ENSG00000135454 | B4GALNT1     | -1.330075823 | 0.001673 |
| ENSG00000139044 | B4GALNT3     | 1.099766094  | 6.78E-09 |
| ENSG00000123810 | B9D2         | 1.207768422  | 0.000646 |
| ENSG00000112182 | BACH2        | -1.140310144 | 0.000404 |
| ENSG00000112208 | BAG2         | -1.018685154 | 0.003297 |
| ENSG00000128298 | BAIAP2L2     | 1.05910412   | 0.006001 |
| ENSG00000007516 | BAIAP3       | -1.224361426 | 0.005896 |
| ENSG00000030110 | BAK1         | 1.86359409   | 8.21E-12 |
| ENSG00000153064 | BANK1        | -1.830380641 | 8.88E-10 |
| ENSG00000087088 | BAX          | 1.129475354  | 5.28E-09 |
| ENSG00000129151 | BBOX1        | 1.137782156  | 2.29E-05 |
| ENSG00000163093 | BBS5         | -1.021683979 | 0.000203 |
| ENSG00000187244 | BCAM         | -1.065825774 | 7.28E-07 |



|                 |         |              |          |
|-----------------|---------|--------------|----------|
| ENSG00000132692 | BCAN    | -1.511090139 | 0.000108 |
| ENSG00000137936 | BCAR3   | -1.653860977 | 2.06E-09 |
| ENSG00000064787 | BCAS1   | -2.944507708 | 6.7E-13  |
| ENSG00000124243 | BCAS4   | -1.08861054  | 0.00998  |
| ENSG00000103507 | BCKDK   | 1.271234194  | 1.11E-05 |
| ENSG00000142867 | BCL10   | 1.071966354  | 7.51E-06 |
| ENSG00000171791 | BCL2    | -2.518464819 | 4.2E-22  |
| ENSG00000140379 | BCL2A1  | 2.30859514   | 0.001026 |
| ENSG00000137875 | BCL2L10 | 1.62412187   | 3.77E-06 |
| ENSG00000161267 | BDH1    | 1.246283289  | 8.86E-06 |
| ENSG00000100739 | BDKRB1  | 2.038178136  | 0.001154 |
| ENSG00000168398 | BDKRB2  | 1.93660358   | 1.69E-16 |
| ENSG00000176697 | BDNF    | 1.474438852  | 5.96E-05 |
| ENSG00000178409 | BEND3   | 1.116662028  | 8.48E-05 |
| ENSG00000162373 | BEND5   | -2.047498984 | 3.46E-08 |
| ENSG00000151917 | BEND6   | 1.326858561  | 0.004879 |
| ENSG00000165626 | BEND7   | -2.133529486 | 1.1E-08  |
| ENSG00000167995 | BEST1   | -1.184265258 | 0.000161 |
| ENSG00000102409 | BEX4    | -1.242414102 | 5.63E-08 |
| ENSG00000184515 | BEX5    | -2.268022774 | 3.49E-10 |
| ENSG00000125864 | BFSP1   | 1.630138357  | 5.29E-07 |
| ENSG00000242252 | BGLAP   | 2.066870011  | 0.034143 |
| ENSG00000180535 | BHLHA15 | -2.85789815  | 0.040517 |
| ENSG00000123095 | BHLHE41 | -2.473329595 | 9.08E-18 |
| ENSG00000132840 | BHMT2   | -3.001247776 | 1.34E-14 |
| ENSG00000122870 | BICC1   | -1.148541888 | 0.00073  |
| ENSG00000185963 | BICD2   | 1.701872112  | 2.63E-15 |
| ENSG00000100290 | BIK     | 1.229986777  | 0.007494 |
| ENSG00000089685 | BIRC5   | 2.371819949  | 6.11E-14 |
| ENSG00000197299 | BLM     | 1.500400299  | 0.003927 |
| ENSG00000108578 | BLMH    | 2.314538056  | 8.17E-22 |
| ENSG00000095585 | BLNK    | 1.511944121  | 3.53E-11 |
| ENSG00000196072 | BLOC1S2 | 1.449672143  | 4.8E-08  |
| ENSG00000138756 | BMP2K   | 1.478384875  | 3.07E-10 |
| ENSG00000152785 | BMP3    | -2.507042041 | 0.002063 |
| ENSG00000112175 | BMP5    | -3.543358844 | 0.000711 |
| ENSG00000153162 | BMP6    | -1.750318802 | 3.19E-07 |
| ENSG00000101144 | BMP7    | 1.081705409  | 1.04E-05 |
| ENSG00000164619 | BMPER   | -1.423909392 | 0.0027   |
| ENSG00000138696 | BMPR1B  | 1.863811225  | 2.27E-05 |
| ENSG00000102010 | BMX     | -1.88556917  | 2.2E-09  |
| ENSG00000169594 | BNC1    | 2.317065475  | 1.95E-13 |
| ENSG00000173068 | BNC2    | -1.16690489  | 0.000148 |
| ENSG00000176171 | BNIP3   | 1.488274339  | 5.15E-06 |
| ENSG00000163141 | BNIP1   | 1.141860225  | 9.92E-13 |
| ENSG00000144857 | BOC     | -1.692113063 | 6.22E-09 |
| ENSG00000169627 | BOLA2B  | 2.707761923  | 0.011274 |
| ENSG00000261236 | BOP1    | 1.151040598  | 7.91E-06 |

|                 |            |              |          |
|-----------------|------------|--------------|----------|
| ENSG00000184459 | BPIFC      | 2.693112017  | 8.48E-16 |
| ENSG00000078725 | BRINP1     | 1.887429106  | 0.041093 |
| ENSG00000254999 | BRK1       | 1.023596218  | 0.000385 |
| ENSG00000160469 | BRSK1      | -1.799880619 | 0.010566 |
| ENSG00000162399 | BSND       | 3.257131071  | 0.009167 |
| ENSG00000119411 | BSPRY      | 1.708847635  | 6.59E-08 |
| ENSG00000109743 | BST1       | -1.388723021 | 0.00012  |
| ENSG00000189195 | BTBD8      | -1.769304519 | 3.13E-06 |
| ENSG00000174808 | BTC        | -2.541556154 | 2.88E-12 |
| ENSG00000154640 | BTG3       | 1.265232103  | 5.07E-08 |
| ENSG00000026950 | BTN3A1     | -1.049738765 | 0.000138 |
| ENSG00000165810 | BTNL9      | -2.540377097 | 2.41E-09 |
| ENSG00000169679 | BUB1       | 2.083804936  | 1.11E-05 |
| ENSG00000156970 | BUB1B      | 1.30842785   | 0.000436 |
| ENSG00000112276 | BVES       | -1.048120372 | 0.000912 |
| ENSG00000284976 | BX255925.3 | 1.020727782  | 1.12E-06 |
| ENSG00000112578 | BYSL       | 1.237271403  | 6.16E-08 |
| ENSG00000082153 | BZW1       | 1.20411121   | 0.000155 |
| ENSG00000214688 | C10orf105  | -1.985870475 | 0.016982 |
| ENSG00000222047 | C10orf55   | 1.600811938  | 4.18E-07 |
| ENSG00000179133 | C10orf67   | -1.447414223 | 0.006483 |
| ENSG00000154493 | C10orf90   | -1.571138167 | 0.001943 |
| ENSG00000120055 | C10orf95   | 1.368582397  | 0.007046 |
| ENSG00000188373 | C10orf99   | 8.19079535   | 1.36E-30 |
| ENSG00000166323 | C11orf65   | -1.156417992 | 0.011518 |
| ENSG00000185742 | C11orf87   | 3.09300527   | 7.6E-05  |
| ENSG00000187479 | C11orf96   | -1.461104748 | 1.87E-05 |
| ENSG00000133641 | C12orf29   | 1.625868247  | 6.67E-09 |
| ENSG00000185306 | C12orf56   | 5.079586021  | 5.81E-23 |
| ENSG00000235162 | C12orf75   | 1.0852501    | 0.000123 |
| ENSG00000283199 | C13orf46   | -2.418063195 | 0.029367 |
| ENSG00000179933 | C14orf119  | 1.050890969  | 1.87E-06 |
| ENSG00000227051 | C14orf132  | -1.211405285 | 0.00017  |
| ENSG00000184601 | C14orf180  | -4.786510264 | 0.000216 |
| ENSG00000166920 | C15orf48   | 2.035633015  | 0.000615 |
| ENSG00000175779 | C15orf53   | 1.780910286  | 0.018896 |
| ENSG00000205363 | C15orf59   | -1.100018063 | 0.005212 |
| ENSG00000188277 | C15orf62   | 1.066220474  | 0.000732 |
| ENSG00000166780 | C16orf45   | -1.593983592 | 5.69E-08 |
| ENSG00000154102 | C16orf74   | 2.031112305  | 7.24E-06 |
| ENSG00000159761 | C16orf86   | -1.060243362 | 0.011273 |
| ENSG00000153446 | C16orf89   | -1.959529828 | 0.011751 |
| ENSG00000205832 | C16orf96   | -3.167119952 | 7.04E-05 |
| ENSG00000267221 | C17orf113  | -1.837546278 | 0.007093 |
| ENSG00000187624 | C17orf97   | -1.112183197 | 0.005757 |
| ENSG00000177025 | C19orf18   | -2.090269217 | 6.62E-05 |
| ENSG00000167644 | C19orf33   | 2.238648366  | 0.000385 |
| ENSG00000167747 | C19orf48   | 1.007704968  | 9.23E-05 |

|                 |            |              |          |
|-----------------|------------|--------------|----------|
| ENSG00000221916 | C1orf73    | 1.478833272  | 0.012618 |
| ENSG00000223658 | C1GALT1C1L | -1.838561469 | 0.007545 |
| ENSG00000162817 | C1orf115   | -2.798110751 | 9.06E-25 |
| ENSG00000198854 | C1orf68    | 2.369363158  | 0.000152 |
| ENSG00000162757 | C1orf74    | 1.038169493  | 0.001026 |
| ENSG00000173372 | C1QA       | -1.383544323 | 0.002066 |
| ENSG00000131094 | C1QL1      | -1.656078738 | 0.048216 |
| ENSG00000082196 | C1QTNF3    | -1.425022161 | 0.002269 |
| ENSG00000172247 | C1QTNF4    | -2.08551629  | 0.010424 |
| ENSG00000163145 | C1QTNF7    | -3.883655768 | 2.32E-17 |
| ENSG00000240654 | C1QTNF9    | -2.78140019  | 0.019159 |
| ENSG00000205863 | C1QTNF9B   | -2.735296942 | 0.024471 |
| ENSG00000196476 | C2orf96    | -1.45658091  | 1.87E-05 |
| ENSG00000160226 | C21orf2    | -1.216843641 | 0.000113 |
| ENSG00000154642 | C21orf91   | 1.255290071  | 5.17E-08 |
| ENSG00000198535 | C2CD4A     | 4.032072649  | 2.79E-05 |
| ENSG00000155754 | C2CD6      | -2.516220514 | 2.3E-05  |
| ENSG00000119147 | C2orf40    | -2.807278122 | 3.93E-15 |
| ENSG00000172478 | C2orf54    | 1.308786653  | 9.67E-08 |
| ENSG00000179270 | C2orf71    | -2.848419269 | 3.3E-05  |
| ENSG00000204128 | C2orf72    | -2.97770218  | 1.78E-14 |
| ENSG00000187699 | C2orf88    | -2.261357279 | 1.24E-13 |
| ENSG00000228486 | C2orf92    | -1.46859444  | 0.000157 |
| ENSG00000125730 | C3         | -3.156442353 | 1.7E-07  |
| ENSG00000088543 | C3orf18    | -1.674999386 | 1.52E-05 |
| ENSG00000163689 | C3orf67    | 1.893470402  | 0.003523 |
| ENSG00000187068 | C3orf70    | -1.744837395 | 1.08E-08 |
| ENSG00000154274 | C4orf19    | -2.174031479 | 4.21E-10 |
| ENSG00000039537 | C6         | -2.45646141  | 0.005402 |
| ENSG00000203872 | C6orf163   | -1.162991203 | 0.003085 |
| ENSG00000181577 | C6orf223   | 4.3183246    | 8.63E-07 |
| ENSG00000112936 | C7         | -3.27558937  | 4.97E-15 |
| ENSG00000164746 | C7orf57    | 5.194341545  | 3.45E-12 |
| ENSG00000171060 | C8orf74    | 3.428443087  | 0.021105 |
| ENSG00000188959 | C9orf152   | -3.078558071 | 1.02E-09 |
| ENSG00000164972 | C9orf24    | -1.829010193 | 0.014729 |
| ENSG00000165181 | C9orf84    | 2.196708685  | 1.1E-05  |
| ENSG00000104267 | CA2        | 3.060179568  | 1.24E-15 |
| ENSG00000164879 | CA3        | -1.746977614 | 0.000962 |
| ENSG00000167434 | CA4        | -2.361246831 | 1.95E-06 |
| ENSG00000131686 | CA6        | -2.263646589 | 3.98E-07 |
| ENSG00000178538 | CA8        | -1.73361163  | 0.007254 |
| ENSG00000102547 | CAB39L     | -1.127352674 | 1.89E-06 |
| ENSG00000183346 | CABCOC01   | -2.273512629 | 0.000436 |
| ENSG00000175544 | CABP4      | -1.234137619 | 0.021833 |
| ENSG00000151067 | CACNA1C    | -1.054317703 | 0.012714 |
| ENSG00000157388 | CACNA1D    | -1.588542341 | 1.09E-05 |
| ENSG00000102001 | CACNA1F    | -1.880380663 | 0.005883 |

|                 |          |              |          |
|-----------------|----------|--------------|----------|
| ENSG00000006283 | CACNA1G  | -1.323527794 | 0.008    |
| ENSG00000196557 | CACNA1H  | -4.155063107 | 1.41E-27 |
| ENSG00000153956 | CACNA2D1 | -2.045305123 | 7.47E-11 |
| ENSG00000007402 | CACNA2D2 | -2.957406629 | 3.34E-11 |
| ENSG00000151062 | CACNA2D4 | -1.10658236  | 0.024701 |
| ENSG00000067191 | CACNB1   | -1.464494809 | 0.000886 |
| ENSG00000165995 | CACNB2   | -2.527173669 | 3.37E-12 |
| ENSG00000182389 | CACNB4   | 1.301286121  | 0.000952 |
| ENSG00000075461 | CACNG4   | -1.944879643 | 0.00084  |
| ENSG00000142408 | CACNG8   | -1.562830233 | 0.002082 |
| ENSG00000175161 | CADM2    | -3.022922419 | 1.36E-09 |
| ENSG00000162706 | CADM3    | -2.678491788 | 7.08E-16 |
| ENSG00000163618 | CADPS    | -2.008562636 | 5.2E-05  |
| ENSG00000081803 | CADPS2   | -1.29850312  | 6.45E-07 |
| ENSG00000122786 | CALD1    | -1.271674181 | 1.83E-06 |
| ENSG00000138172 | CALHM2   | -1.05114656  | 0.000544 |
| ENSG00000178033 | CALHM5   | -1.344042592 | 0.000135 |
| ENSG00000178363 | CALML3   | 3.707161521  | 2.38E-06 |
| ENSG00000129007 | CALML4   | -1.660642621 | 0.028626 |
| ENSG00000178372 | CALML5   | 3.830644604  | 1.45E-29 |
| ENSG00000169885 | CALML6   | -1.6910254   | 4.03E-05 |
| ENSG00000183166 | CALN1    | 1.073845981  | 0.014381 |
| ENSG00000134072 | CAMK1    | -1.563958104 | 2.14E-10 |
| ENSG00000058404 | CAMK2B   | -2.851800759 | 3.2E-11  |
| ENSG00000162545 | CAMK2N1  | -1.487369809 | 6.46E-06 |
| ENSG00000163888 | CAMK2N2  | 3.598915009  | 1.27E-05 |
| ENSG00000164047 | CAMP     | 3.289103584  | 0.012993 |
| ENSG00000144712 | CAND2    | -2.164760098 | 4.56E-08 |
| ENSG00000112186 | CAP2     | -1.16121018  | 0.000244 |
| ENSG00000042493 | CAPG     | 1.569353806  | 5.46E-11 |
| ENSG00000137225 | CAPN11   | -1.199178021 | 0.045397 |
| ENSG00000162949 | CAPN13   | -2.054198511 | 0.02205  |
| ENSG00000103326 | CAPN15   | 1.20821843   | 2.65E-06 |
| ENSG00000149260 | CAPN5    | -1.212372813 | 0.000339 |
| ENSG00000077274 | CAPN6    | -1.849300056 | 4.42E-05 |
| ENSG00000135773 | CAPN9    | -2.265337074 | 0.00229  |
| ENSG00000256812 | CAPNS2   | 1.274971258  | 3.47E-08 |
| ENSG00000180881 | CAPS2    | -1.184171643 | 0.000412 |
| ENSG00000116489 | CAPZA1   | 1.280507756  | 5.14E-09 |
| ENSG00000177938 | CAPZA3   | -3.290364409 | 0.002639 |
| ENSG00000100065 | CARD10   | 1.063110743  | 0.000369 |
| ENSG00000141527 | CARD14   | 1.374802513  | 2.58E-07 |
| ENSG00000255501 | CARD18   | 1.321165752  | 0.000874 |
| ENSG00000132357 | CARD6    | 1.323219316  | 1.56E-06 |
| ENSG00000153048 | CARHSP1  | 1.341727236  | 1.44E-05 |
| ENSG00000186648 | CARMIL3  | 1.258602372  | 2.24E-06 |
| ENSG00000118307 | CASC1    | -2.552634524 | 3.67E-12 |
| ENSG00000105141 | CASP14   | 3.794993408  | 1.66E-37 |

|                 |          |              |          |
|-----------------|----------|--------------|----------|
| ENSG00000196954 | CASP4    | 1.118987313  | 4.96E-07 |
| ENSG00000143318 | CASQ1    | -2.644759242 | 0.003377 |
| ENSG00000118729 | CASQ2    | -3.016352835 | 3.06E-21 |
| ENSG00000175294 | CATSPER1 | 2.605419861  | 0.017935 |
| ENSG00000099338 | CATSPERG | -1.82658635  | 3.41E-07 |
| ENSG00000168497 | CAVIN2   | -2.753033838 | 1.13E-19 |
| ENSG00000099625 | CBARP    | 1.749391289  | 0.000903 |
| ENSG00000129993 | CBFA2T3  | -1.050623342 | 7.36E-05 |
| ENSG00000142273 | CBLC     | 1.502232334  | 3.21E-09 |
| ENSG00000102924 | CBLN1    | -2.42912026  | 0.000129 |
| ENSG00000159228 | CBR1     | 1.167345437  | 1.67E-08 |
| ENSG00000159231 | CBR3     | 1.062981916  | 8.17E-05 |
| ENSG00000173894 | CBX2     | 1.755675912  | 2.87E-08 |
| ENSG00000183741 | CBX6     | -1.405659127 | 1.06E-05 |
| ENSG00000100307 | CBX7     | -1.71853287  | 8.22E-09 |
| ENSG00000183287 | CCBE1    | -2.328813462 | 1.27E-09 |
| ENSG00000159884 | CCDC107  | -1.028201684 | 2.44E-05 |
| ENSG00000168491 | CCDC110  | -2.855929369 | 6.03E-08 |
| ENSG00000105479 | CCDC114  | -2.598627468 | 7.75E-05 |
| ENSG00000147144 | CCDC120  | 1.625462759  | 9.75E-12 |
| ENSG00000176714 | CCDC121  | -1.034036018 | 7.36E-05 |
| ENSG00000007080 | CCDC124  | 1.063702804  | 5.81E-05 |
| ENSG00000180347 | CCDC129  | -3.725784853 | 7.28E-12 |
| ENSG00000128596 | CCDC136  | -1.852077819 | 7.48E-09 |
| ENSG00000163492 | CCDC141  | -2.238164724 | 0.003901 |
| ENSG00000135205 | CCDC146  | -1.750076992 | 2.87E-06 |
| ENSG00000153237 | CCDC148  | -1.921331358 | 1.63E-05 |
| ENSG00000181982 | CCDC149  | -1.273140475 | 1.88E-09 |
| ENSG00000198865 | CCDC152  | -1.021511983 | 0.003223 |
| ENSG00000197599 | CCDC154  | -1.475824796 | 9.31E-05 |
| ENSG00000163749 | CCDC158  | -2.310365035 | 0.041538 |
| ENSG00000203952 | CCDC160  | -2.646093545 | 0.008117 |
| ENSG00000198937 | CCDC167  | 1.387090948  | 1.05E-08 |
| ENSG00000120262 | CCDC170  | -1.878083068 | 4.13E-08 |
| ENSG00000164989 | CCDC171  | -1.14758952  | 0.003217 |
| ENSG00000166960 | CCDC178  | -2.418737513 | 1.9E-06  |
| ENSG00000197816 | CCDC180  | -2.338677481 | 0.006286 |
| ENSG00000117477 | CCDC181  | -1.949795048 | 0.040359 |
| ENSG00000163617 | CCDC191  | -1.427374495 | 7.94E-07 |
| ENSG00000159214 | CCDC24   | -1.651502228 | 1.13E-05 |
| ENSG00000140481 | CCDC33   | 3.01858121   | 0.037445 |
| ENSG00000173421 | CCDC36   | -2.090366229 | 0.000106 |
| ENSG00000173093 | CCDC63   | 5.653480371  | 7.25E-11 |
| ENSG00000139537 | CCDC65   | -1.805484815 | 0.016708 |
| ENSG00000198624 | CCDC69   | -1.361206997 | 2.11E-06 |
| ENSG00000216937 | CCDC7    | -1.291650099 | 0.001738 |
| ENSG00000091986 | CCDC80   | -2.144533778 | 8.38E-07 |
| ENSG00000055813 | CCDC85A  | -2.534768608 | 0.006377 |

|                 |         |              |          |
|-----------------|---------|--------------|----------|
| ENSG00000205476 | CCDC85C | 1.476490107  | 1.61E-08 |
| ENSG00000187094 | CCK     | 3.418468947  | 0.007685 |
| ENSG00000110148 | CCKBR   | -2.233621169 | 0.002383 |
| ENSG00000181374 | CCL13   | -1.528195308 | 0.009593 |
| ENSG00000276409 | CCL14   | -2.145220214 | 0.005061 |
| ENSG00000275385 | CCL18   | 2.470349714  | 0.000132 |
| ENSG00000115009 | CCL20   | 3.105228115  | 0.001091 |
| ENSG00000106178 | CCL24   | 4.463460684  | 1.79E-05 |
| ENSG00000151882 | CCL28   | -1.344550389 | 3.8E-06  |
| ENSG00000276085 | CCL3L1  | 3.935755346  | 0.009543 |
| ENSG00000108688 | CCL7    | 4.930058253  | 1.83E-06 |
| ENSG00000101331 | CCM2L   | -1.204402368 | 0.000521 |
| ENSG00000133101 | CCNA1   | 2.260522066  | 0.011777 |
| ENSG00000145386 | CCNA2   | 1.812195714  | 3.2E-09  |
| ENSG00000134057 | CCNB1   | 2.460850858  | 1.14E-10 |
| ENSG00000157456 | CCNB2   | 2.113481827  | 3.96E-12 |
| ENSG00000110092 | CCND1   | -1.038806172 | 1.42E-06 |
| ENSG00000105173 | CCNE1   | 1.890304247  | 5.41E-10 |
| ENSG00000175305 | CCNE2   | 1.728176323  | 2.19E-09 |
| ENSG00000260916 | CCPG1   | -1.004495177 | 0.000302 |
| ENSG00000183625 | CCR3    | 2.853686556  | 0.029871 |
| ENSG00000184305 | CCSER1  | -2.103117121 | 1.11E-11 |
| ENSG00000163468 | CCT3    | 1.281212865  | 1.29E-08 |
| ENSG00000150753 | CCT5    | 1.23480507   | 4.98E-06 |
| ENSG00000146731 | CCT6A   | 1.01731264   | 2E-08    |
| ENSG00000177575 | CD163   | -1.328900319 | 0.007955 |
| ENSG00000177675 | CD163L1 | -1.014445716 | 0.002746 |
| ENSG00000174950 | CD164L2 | 1.836272667  | 1.07E-09 |
| ENSG00000204936 | CD177   | 2.823366008  | 0.000205 |
| ENSG00000091972 | CD200   | -1.074305711 | 0.001129 |
| ENSG00000272398 | CD24    | 2.022120638  | 7.05E-08 |
| ENSG00000174807 | CD248   | -1.619152307 | 5.05E-05 |
| ENSG00000120217 | CD274   | 1.526586207  | 0.005198 |
| ENSG00000161649 | CD300LG | -2.727979158 | 1.71E-14 |
| ENSG00000241399 | CD302   | -1.881150277 | 3.54E-13 |
| ENSG00000174059 | CD34    | -1.890128056 | 1.57E-08 |
| ENSG00000110848 | CD69    | 3.922115376  | 0.000362 |
| ENSG00000125726 | CD70    | -1.93331887  | 0.039437 |
| ENSG00000137101 | CD72    | -1.636762649 | 0.002428 |
| ENSG00000019582 | CD74    | -1.134619159 | 1.01E-05 |
| ENSG00000066294 | CD84    | -1.121059349 | 0.005731 |
| ENSG00000172116 | CD8B    | -1.519304454 | 0.03783  |
| ENSG00000102181 | CD99L2  | -1.463728357 | 1.15E-07 |
| ENSG00000158825 | CDA     | 2.742334391  | 9.5E-14  |
| ENSG00000117399 | CDC20   | 2.16997945   | 2.12E-08 |
| ENSG00000164045 | CDC25A  | 2.091556672  | 3.29E-07 |
| ENSG00000101224 | CDC25B  | 1.807248936  | 4.82E-14 |
| ENSG00000158402 | CDC25C  | 2.361034554  | 8.5E-06  |

|                 |          |              |          |
|-----------------|----------|--------------|----------|
| ENSG00000197622 | CDC42SE1 | 1.15456901   | 8.46E-08 |
| ENSG00000093009 | CDC45    | 2.145498716  | 2.39E-05 |
| ENSG00000094804 | CDC6     | 1.672497771  | 2.25E-07 |
| ENSG00000184661 | CDCA2    | 1.652455705  | 0.000519 |
| ENSG00000111665 | CDCA3    | 1.205621424  | 5.03E-05 |
| ENSG00000170779 | CDCA4    | 1.297937518  | 1.35E-08 |
| ENSG00000146670 | CDCA5    | 1.582842099  | 3.65E-07 |
| ENSG00000144354 | CDCA7    | 1.149792906  | 4.29E-05 |
| ENSG00000134690 | CDCA8    | 1.142448997  | 4.19E-06 |
| ENSG00000163814 | CDCP1    | 1.172909832  | 2.09E-06 |
| ENSG00000039068 | CDH1     | 1.164811967  | 4.25E-05 |
| ENSG00000040731 | CDH10    | -4.815749548 | 0.000386 |
| ENSG00000154162 | CDH12    | -2.961072079 | 2.65E-05 |
| ENSG00000129910 | CDH15    | 3.106048039  | 0.014557 |
| ENSG00000166589 | CDH16    | 3.643402781  | 0.022996 |
| ENSG00000071991 | CDH19    | -1.922458181 | 2.36E-06 |
| ENSG00000101542 | CDH20    | -2.660972258 | 3.65E-05 |
| ENSG00000149654 | CDH22    | -2.758435563 | 1.6E-12  |
| ENSG00000107736 | CDH23    | -1.098149544 | 0.009533 |
| ENSG00000124215 | CDH26    | 2.124510511  | 2.01E-07 |
| ENSG00000062038 | CDH3     | 2.073867935  | 1.12E-08 |
| ENSG00000179242 | CDH4     | -2.038457192 | 1.59E-05 |
| ENSG00000179776 | CDH5     | -1.153110472 | 0.001282 |
| ENSG00000113361 | CDH6     | -2.042035972 | 6.06E-07 |
| ENSG00000128536 | CDHR3    | -1.157322441 | 0.000311 |
| ENSG00000170312 | CDK1     | 1.530222209  | 1.24E-07 |
| ENSG00000058091 | CDK14    | -1.735778413 | 1.73E-21 |
| ENSG00000156345 | CDK20    | -1.023733049 | 0.000783 |
| ENSG00000176749 | CDK5R1   | 3.103490344  | 2.25E-23 |
| ENSG00000134058 | CDK7     | 1.127972142  | 2.52E-09 |
| ENSG00000124762 | CDKN1A   | 1.590215616  | 2.85E-06 |
| ENSG00000100526 | CDKN3    | 1.889379856  | 4.34E-08 |
| ENSG00000185267 | CDFN     | -1.48630887  | 2.59E-06 |
| ENSG00000129596 | CDO1     | -4.022372814 | 1.51E-09 |
| ENSG00000064309 | CDON     | -1.609583522 | 6.13E-06 |
| ENSG00000241322 | CDRT1    | 2.121172237  | 0.002037 |
| ENSG00000239704 | CDRT4    | -1.452889088 | 0.023442 |
| ENSG00000163624 | CDS1     | 1.156416796  | 1.69E-10 |
| ENSG00000204539 | CDSN     | 6.055419523  | 1.93E-12 |
| ENSG00000167513 | CDT1     | 1.158635891  | 8.14E-05 |
| ENSG00000079385 | CEACAM1  | -1.37388302  | 0.000206 |
| ENSG00000186567 | CEACAM19 | 2.36603338   | 1.21E-21 |
| ENSG00000170956 | CEACAM3  | 2.727393015  | 0.030317 |
| ENSG00000105388 | CEACAM5  | -1.078370267 | 0.021014 |
| ENSG00000086548 | CEACAM6  | -1.524964101 | 0.000469 |
| ENSG00000007306 | CEACAM7  | -1.425742601 | 0.000239 |
| ENSG00000170835 | CEL      | -1.698590662 | 0.005298 |
| ENSG00000048740 | CELF2    | -1.522028508 | 2.02E-08 |



|                 |          |              |          |
|-----------------|----------|--------------|----------|
| ENSG00000161082 | CELF5    | -2.29473233  | 2.38E-05 |
| ENSG00000143126 | CELSR2   | 1.005622397  | 2.1E-05  |
| ENSG00000103888 | CEMIP    | 4.181228751  | 6.13E-11 |
| ENSG00000115163 | CENPA    | 2.028129852  | 4.84E-08 |
| ENSG00000123219 | CENPK    | 1.080593993  | 0.004721 |
| ENSG00000100162 | CENPM    | 1.612684174  | 1.36E-07 |
| ENSG00000166451 | CENPN    | 1.543508977  | 8.41E-07 |
| ENSG00000151725 | CENPU    | 1.225104597  | 3.58E-09 |
| ENSG00000166582 | CENPV    | -1.928047812 | 1.89E-10 |
| ENSG00000203760 | CENPW    | 1.3306394    | 7.27E-06 |
| ENSG00000169689 | CENPX    | 1.051262774  | 1.05E-05 |
| ENSG00000154240 | CEP112   | -1.310489205 | 8.27E-09 |
| ENSG00000110318 | CEP126   | -2.433454353 | 1.44E-11 |
| ENSG00000198707 | CEP290   | -1.065388474 | 6.91E-05 |
| ENSG00000178404 | CEP295NL | -1.722559539 | 0.016678 |
| ENSG00000138180 | CEP55    | 2.042553047  | 5.16E-08 |
| ENSG00000011523 | CEP68    | -1.161830818 | 1E-06    |
| ENSG00000101624 | CEP76    | 1.188954017  | 8.5E-06  |
| ENSG00000111860 | CEP85L   | -1.848424771 | 1.15E-10 |
| ENSG00000154227 | CERS3    | 2.623370531  | 7.09E-22 |
| ENSG00000198848 | CES1     | -3.085493664 | 6.44E-08 |
| ENSG00000137691 | CFAP300  | -1.126469131 | 0.024872 |
| ENSG00000197748 | CFAP43   | -2.156870089 | 1.83E-06 |
| ENSG00000206530 | CFAP44   | -1.188716578 | 0.001456 |
| ENSG00000172361 | CFAP53   | -1.562422973 | 0.00053  |
| ENSG00000188596 | CFAP54   | 2.798573442  | 0.001016 |
| ENSG00000105792 | CFAP69   | -1.474706238 | 4.24E-08 |
| ENSG00000156042 | CFAP70   | -1.978777733 | 3.79E-07 |
| ENSG00000186710 | CFAP73   | -1.110414182 | 0.012425 |
| ENSG00000197766 | CFD      | -2.883689952 | 2.75E-12 |
| ENSG00000000971 | CFH      | -2.270093582 | 1.54E-12 |
| ENSG00000172757 | CFL1     | 1.165657282  | 1.28E-06 |
| ENSG00000165410 | CFL2     | -1.358506388 | 5.42E-08 |
| ENSG00000001626 | CFTR     | -3.078225578 | 4.05E-11 |
| ENSG00000164430 | CGAS     | 1.670448458  | 1.45E-05 |
| ENSG00000128849 | CGNL1    | -2.454451753 | 2.43E-16 |
| ENSG00000138135 | CH25H    | 1.604381623  | 0.001084 |
| ENSG00000128965 | CHAC1    | 3.114757729  | 1.04E-07 |
| ENSG00000143942 | CHAC2    | 2.317393073  | 7.64E-10 |
| ENSG00000136457 | CHAD     | -3.737269537 | 1.15E-10 |
| ENSG00000100399 | CHADL    | -1.842057567 | 0.000333 |
| ENSG00000250479 | CHCHD10  | -1.385791484 | 1.34E-07 |
| ENSG00000116254 | CHD5     | -1.89959792  | 0.002842 |
| ENSG00000124177 | CHD6     | -1.258683683 | 6.94E-05 |
| ENSG00000016391 | CHDH     | -2.153291188 | 4.85E-08 |
| ENSG00000149554 | CHEK1    | 1.395395217  | 6.17E-08 |
| ENSG00000100604 | CHGA     | -3.180113875 | 0.000525 |
| ENSG00000109220 | CHIC2    | 1.385668716  | 4.23E-06 |



|                 |         |              |          |
|-----------------|---------|--------------|----------|
| ENSG00000110721 | CHKA    | -1.408451551 | 1.19E-10 |
| ENSG00000106069 | CHN2    | -1.860682115 | 0.040776 |
| ENSG00000111666 | CHPT1   | -2.011229286 | 2.32E-15 |
| ENSG00000090539 | CHRD    | -1.400402518 | 0.000706 |
| ENSG00000101938 | CHRD1   | -3.420787232 | 2.66E-09 |
| ENSG00000054938 | CHRD2   | 2.814550831  | 0.007848 |
| ENSG00000168539 | CHRM1   | -3.425489598 | 6.44E-12 |
| ENSG00000133019 | CHRM3   | -3.090868642 | 9.87E-09 |
| ENSG00000184984 | CHRM5   | -3.060919856 | 0.046952 |
| ENSG00000120903 | CHRNA2  | -4.942142754 | 0.000498 |
| ENSG00000080644 | CHRNA3  | 6.401202362  | 1.21E-17 |
| ENSG00000169684 | CHRNA5  | 2.204607787  | 1.42E-05 |
| ENSG00000174343 | CHRNA9  | 5.248085383  | 4.89E-25 |
| ENSG00000117971 | CHRN4   | 4.348036757  | 0.0011   |
| ENSG00000175264 | CHST1   | 2.553210988  | 1.7E-06  |
| ENSG00000136213 | CHST12  | -1.019265612 | 0.002776 |
| ENSG00000005194 | CIAPIN1 | 1.103295171  | 7.13E-07 |
| ENSG00000136425 | CIB2    | 1.148857266  | 0.000424 |
| ENSG00000187288 | CIDEC   | -4.908769359 | 4.23E-07 |
| ENSG00000138615 | CILP    | -2.879355785 | 1.33E-10 |
| ENSG00000160161 | CILP2   | -2.276252986 | 0.007909 |
| ENSG00000136108 | CKAP2   | 1.30067804   | 2.33E-10 |
| ENSG00000169607 | CKAP2L  | 1.035638636  | 0.002054 |
| ENSG00000136026 | CKAP4   | 1.33836641   | 6.65E-18 |
| ENSG00000104879 | CKM     | -2.762792051 | 0.030056 |
| ENSG00000237289 | CKMT1B  | 1.204321835  | 8.31E-05 |
| ENSG00000131730 | CKMT2   | -2.968689703 | 1.22E-12 |
| ENSG00000123975 | CKS2    | 2.066370106  | 1.99E-11 |
| ENSG00000137975 | CLCA2   | 2.285451501  | 3.41E-14 |
| ENSG0000016602  | CLCA4   | 1.202564757  | 0.00054  |
| ENSG00000175505 | CLCF1   | 1.0819748    | 0.020456 |
| ENSG00000188037 | CLCN1   | 4.567392058  | 4.57E-06 |
| ENSG00000073464 | CLCN4   | -1.478143999 | 0.000874 |
| ENSG00000186510 | CLCNKA  | -3.631136774 | 4.63E-09 |
| ENSG00000184908 | CLCNKB  | -4.370896097 | 0.00084  |
| ENSG00000134873 | CLDN10  | -2.559620599 | 7.48E-05 |
| ENSG00000013297 | CLDN11  | -1.337951931 | 0.002156 |
| ENSG00000113946 | CLDN16  | -1.636769803 | 0.00011  |
| ENSG00000156282 | CLDN17  | 7.456314198  | 1.1E-06  |
| ENSG00000165376 | CLDN2   | -2.964779834 | 0.044647 |
| ENSG00000177300 | CLDN22  | 5.267811844  | 0.001041 |
| ENSG00000253958 | CLDN23  | -1.453487543 | 4.91E-05 |
| ENSG00000165215 | CLDN3   | -3.707371956 | 1.2E-09  |
| ENSG00000234469 | CLDN34  | 3.063925059  | 0.014228 |
| ENSG00000184113 | CLDN5   | -2.02706021  | 4.26E-09 |
| ENSG00000181885 | CLDN7   | -1.273949878 | 0.001555 |
| ENSG00000156284 | CLDN8   | -2.964092783 | 9.25E-10 |
| ENSG00000256660 | CLEC12B | -1.066576759 | 0.025376 |

|                 |          |              |          |
|-----------------|----------|--------------|----------|
| ENSG00000188393 | CLEC2A   | -1.091764735 | 0.003654 |
| ENSG00000163815 | CLEC3B   | -2.492484609 | 3.1E-11  |
| ENSG00000152672 | CLEC4F   | -1.422654811 | 0.037265 |
| ENSG00000172243 | CLEC7A   | 3.332955822  | 1.58E-37 |
| ENSG00000153132 | CLGN     | -2.768940489 | 3.55E-08 |
| ENSG00000213719 | CLIC1    | 1.137353317  | 4.72E-05 |
| ENSG00000155962 | CLIC2    | -1.206540519 | 7.28E-08 |
| ENSG00000169583 | CLIC3    | 2.580449377  | 2.96E-12 |
| ENSG00000112782 | CLIC5    | -2.946679346 | 1E-10    |
| ENSG00000159212 | CLIC6    | -2.096724462 | 1.25E-09 |
| ENSG00000105270 | CLIP3    | -1.92633955  | 7.71E-08 |
| ENSG00000165959 | CLMN     | -1.569743114 | 1.34E-11 |
| ENSG00000166250 | CLMP     | -2.200463841 | 5.68E-10 |
| ENSG00000182372 | CLN8     | 1.028742945  | 2.42E-10 |
| ENSG00000166855 | CLPX     | 1.010173425  | 3.17E-05 |
| ENSG00000092853 | CLSPN    | 1.025321702  | 0.00268  |
| ENSG00000158258 | CLSTN2   | -3.121022895 | 1.4E-16  |
| ENSG00000175416 | CLTB     | 1.302409775  | 4.77E-11 |
| ENSG00000120885 | CLU      | -2.40040885  | 3.84E-17 |
| ENSG00000079101 | CLUL1    | -3.813617725 | 2.79E-06 |
| ENSG00000177182 | CLVS1    | 1.549384861  | 0.021903 |
| ENSG00000146352 | CLVS2    | -2.916144577 | 4.18E-05 |
| ENSG00000092009 | CMA1     | -1.992270473 | 6.7E-06  |
| ENSG00000164237 | CMBL     | -1.773597895 | 7.98E-09 |
| ENSG00000174600 | CMKLR1   | -1.41517731  | 0.000275 |
| ENSG00000140932 | CMTM2    | 2.673311518  | 0.01673  |
| ENSG00000140931 | CMTM3    | -1.095514846 | 4.57E-06 |
| ENSG00000153551 | CMTM7    | -1.182051128 | 0.001863 |
| ENSG00000164309 | CMYA5    | -1.133078461 | 0.002208 |
| ENSG00000150656 | CNDP1    | -3.023262109 | 1.4E-05  |
| ENSG00000105427 | CNFN     | 5.654598862  | 3.23E-25 |
| ENSG00000198515 | CNGA1    | -1.06168237  | 0.001503 |
| ENSG00000070729 | CNGB1    | 5.774739237  | 2.44E-17 |
| ENSG00000149970 | CNKS2    | -4.50204759  | 1E-14    |
| ENSG00000130176 | CNN1     | -2.839603182 | 4.27E-13 |
| ENSG00000119946 | CNNM1    | -1.23023333  | 5.62E-05 |
| ENSG00000158158 | CNNM4    | 1.274155357  | 3.5E-07  |
| ENSG00000118432 | CNR1     | -1.725054681 | 0.000389 |
| ENSG00000119865 | CNRIP1   | -1.641802604 | 2.86E-07 |
| ENSG00000176563 | CNTD1    | -3.429683917 | 0.028651 |
| ENSG00000122756 | CNTFR    | -3.451027802 | 4.42E-13 |
| ENSG00000184144 | CNTN2    | -3.205909737 | 3.54E-08 |
| ENSG00000113805 | CNTN3    | -2.735459505 | 7.71E-07 |
| ENSG00000144619 | CNTN4    | -3.145964895 | 2.67E-10 |
| ENSG00000134115 | CNTN6    | -2.450008951 | 0.004415 |
| ENSG00000174469 | CNTNAP2  | 2.963401272  | 6.33E-06 |
| ENSG00000106714 | CNTNAP3  | -1.733477397 | 1.98E-09 |
| ENSG00000154529 | CNTNAP3B | -1.831827316 | 1.43E-08 |

|                 |          |              |          |
|-----------------|----------|--------------|----------|
| ENSG00000100473 | COCH     | -3.944763599 | 4.78E-17 |
| ENSG00000060718 | COL11A1  | -1.808039859 | 0.000357 |
| ENSG00000204248 | COL11A2  | -1.461382636 | 0.009997 |
| ENSG00000124749 | COL21A1  | -2.087532526 | 1.11E-08 |
| ENSG00000169436 | COL22A1  | 1.465856897  | 0.04775  |
| ENSG00000050767 | COL23A1  | -1.017306543 | 0.025534 |
| ENSG00000171502 | COL24A1  | -1.602770358 | 3.75E-05 |
| ENSG00000188517 | COL25A1  | -2.874890781 | 2.53E-11 |
| ENSG00000160963 | COL26A1  | -2.763127124 | 9.59E-05 |
| ENSG00000215018 | COL28A1  | -1.566985013 | 0.000156 |
| ENSG00000169031 | COL4A3   | -1.579046139 | 0.000917 |
| ENSG00000144810 | COL8A1   | -2.018649719 | 5.67E-08 |
| ENSG00000112280 | COL9A1   | -2.825270871 | 0.006081 |
| ENSG00000049089 | COL9A2   | -1.980645713 | 2.55E-06 |
| ENSG00000214290 | COLCA2   | -3.281483344 | 5.15E-06 |
| ENSG00000158270 | COLEC12  | -1.621408464 | 8.83E-06 |
| ENSG00000198756 | COLGALT2 | -1.545222037 | 0.008092 |
| ENSG00000169019 | COMMD8   | 1.333791894  | 2.07E-05 |
| ENSG00000172428 | COPS9    | 1.361878948  | 7.88E-11 |
| ENSG00000173085 | COQ2     | 1.16570466   | 1.59E-07 |
| ENSG00000163050 | COQ8A    | -1.563944317 | 5.86E-12 |
| ENSG00000145244 | CORIN    | -1.251277085 | 0.011175 |
| ENSG00000103647 | CORO2B   | -2.263643925 | 2E-12    |
| ENSG00000161281 | COX7A1   | -1.964467673 | 1.1E-11  |
| ENSG00000047457 | CP       | -2.420036011 | 2.31E-07 |
| ENSG00000128510 | CPA4     | 2.71339667   | 4.2E-22  |
| ENSG00000158525 | CPA5     | 2.70099468   | 0.006998 |
| ENSG00000165078 | CPA6     | 4.109220688  | 1.74E-06 |
| ENSG00000160111 | CPAMD8   | -1.813178903 | 2.95E-07 |
| ENSG00000153002 | CPB1     | -4.351746756 | 1.53E-06 |
| ENSG00000109472 | CPE      | -1.921233697 | 8.61E-13 |
| ENSG00000214575 | CPEB1    | -1.347809862 | 0.005161 |
| ENSG00000137449 | CPEB2    | 1.111245374  | 1.29E-07 |
| ENSG00000106034 | CPED1    | -2.959994604 | 2.13E-21 |
| ENSG00000100884 | CPNE6    | -2.762238394 | 0.046878 |
| ENSG00000104324 | CPQ      | -1.311896717 | 1.58E-08 |
| ENSG00000166426 | CRABP1   | -1.750623405 | 0.000239 |
| ENSG00000143320 | CRABP2   | 1.582279564  | 2.46E-09 |
| ENSG00000130038 | CRACR2A  | -3.154476046 | 4.82E-14 |
| ENSG00000177685 | CRACR2B  | -3.011481124 | 4.08E-11 |
| ENSG00000095321 | CRAT     | -1.393056794 | 0.001754 |
| ENSG00000148204 | CRB2     | -2.146467644 | 0.014086 |
| ENSG00000130545 | CRB3     | 1.237537077  | 0.000151 |
| ENSG00000169509 | CRCT1    | 4.63073315   | 1.91E-13 |
| ENSG00000146592 | CREB5    | -1.031563244 | 0.009465 |
| ENSG00000164463 | CREBRF   | -1.031424447 | 0.000538 |
| ENSG00000175874 | CREG2    | 2.907908126  | 4.5E-07  |
| ENSG00000145708 | CRHBP    | -4.160345259 | 1.18E-14 |

|                 |          |              |          |
|-----------------|----------|--------------|----------|
| ENSG00000150938 | CRIM1    | -1.442541503 | 3.39E-11 |
| ENSG00000213145 | CRIP1    | -1.758108091 | 0.004653 |
| ENSG00000146215 | CRIP3    | -3.438663479 | 0.000292 |
| ENSG00000124490 | CRISP2   | -2.632856207 | 0.016156 |
| ENSG00000121005 | CRISPLD1 | -2.266298839 | 6.91E-16 |
| ENSG00000006016 | CRLF1    | 1.44692415   | 2.36E-05 |
| ENSG00000176390 | CRLF3    | 1.040766855  | 2.17E-05 |
| ENSG00000072832 | CRMP1    | 1.291353458  | 0.026472 |
| ENSG00000143536 | CRNN     | 2.720526842  | 0.002976 |
| ENSG00000170275 | CRTAP    | -1.080355604 | 6.31E-08 |
| ENSG00000121671 | CRY2     | -1.388136276 | 1.77E-08 |
| ENSG00000109846 | CRYAB    | -1.524076349 | 5.43E-07 |
| ENSG00000244752 | CRYBB2   | 1.678395205  | 0.046097 |
| ENSG00000112297 | CRYBG1   | 1.231614679  | 7.63E-08 |
| ENSG00000176092 | CRYBG2   | 1.34830204   | 8.22E-08 |
| ENSG00000172346 | CSDC2    | -1.765224748 | 0.000938 |
| ENSG00000198223 | CSF2RA   | -1.139412744 | 9.87E-05 |
| ENSG00000183117 | CSMD1    | -2.95177671  | 0.000181 |
| ENSG00000126545 | CSN1S1   | -4.012138578 | 9.33E-05 |
| ENSG00000113712 | CSNK1A1  | 1.147350165  | 1.33E-08 |
| ENSG00000070770 | CSNK2A2  | 1.60023667   | 4.84E-20 |
| ENSG00000144655 | CSRNP1   | 1.103701251  | 0.000349 |
| ENSG00000178662 | CSRNP3   | -1.273573329 | 0.001174 |
| ENSG00000159176 | CSRP1    | -1.178331037 | 1.9E-06  |
| ENSG00000175183 | CSRP2    | 1.242533812  | 1.78E-05 |
| ENSG00000175315 | CST6     | 3.388562206  | 4.09E-08 |
| ENSG00000077984 | CST7     | 1.347169721  | 0.039722 |
| ENSG00000121552 | CSTA     | 4.268527105  | 3E-31    |
| ENSG00000160213 | CSTB     | 2.054430789  | 2.8E-06  |
| ENSG00000150281 | CTF1     | -1.278751685 | 0.000401 |
| ENSG00000118523 | CTGF     | -1.621840455 | 9.68E-07 |
| ENSG00000116761 | CTH      | 1.112188963  | 0.019966 |
| ENSG00000183230 | CTNNA3   | -3.509358058 | 0.001715 |
| ENSG00000178585 | CTNNBIP1 | 1.563950086  | 3.03E-08 |
| ENSG00000171793 | CTPS1    | 1.180858153  | 3.48E-08 |
| ENSG00000064601 | CTSA     | 1.057649098  | 3.35E-07 |
| ENSG00000109861 | CTSC     | 1.656880284  | 8.61E-13 |
| ENSG00000174080 | CTSF     | -1.296017939 | 4.28E-10 |
| ENSG00000100448 | CTSG     | -1.66244303  | 5.95E-05 |
| ENSG00000136943 | CTSV     | 1.810385903  | 4.15E-11 |
| ENSG00000172543 | CTSW     | -1.658278828 | 0.006625 |
| ENSG00000077063 | CTTNBP2  | -1.242130021 | 0.001955 |
| ENSG00000107611 | CUBN     | -1.068662972 | 0.002892 |
| ENSG00000111249 | CUX2     | -2.409133346 | 0.003941 |
| ENSG00000109182 | CWH43    | 1.823957285  | 3.54E-15 |
| ENSG00000006210 | CX3CL1   | -2.280889871 | 2.48E-14 |
| ENSG00000168329 | CX3CR1   | -1.018398737 | 0.007609 |
| ENSG00000163739 | CXCL1    | 3.455333981  | 5.77E-06 |

|                 |         |              |          |
|-----------------|---------|--------------|----------|
| ENSG00000169248 | CXCL11  | 2.348759779  | 0.005623 |
| ENSG00000107562 | CXCL12  | -1.987020042 | 9.7E-09  |
| ENSG00000156234 | CXCL13  | 3.987622179  | 0.000152 |
| ENSG00000189377 | CXCL17  | 1.986166431  | 0.003947 |
| ENSG00000081041 | CXCL2   | 1.716978246  | 0.025623 |
| ENSG00000169429 | CXCL8   | 7.155080346  | 7.75E-13 |
| ENSG00000163464 | CXCR1   | 7.215717243  | 4.42E-11 |
| ENSG00000180871 | CXCR2   | 1.570351492  | 3.12E-05 |
| ENSG00000147113 | CXorf36 | -1.343726109 | 2.73E-05 |
| ENSG00000147231 | CXorf57 | -1.442234639 | 3.1E-05  |
| ENSG00000168772 | CXXC4   | -2.377390333 | 2.73E-07 |
| ENSG00000071967 | CYBRD1  | -1.942361615 | 7.28E-12 |
| ENSG00000172115 | CYCS    | 1.101864448  | 0.00015  |
| ENSG00000161544 | CYGB    | -1.527217485 | 6.99E-08 |
| ENSG00000140459 | CYP11A1 | -1.947705382 | 0.002589 |
| ENSG00000148795 | CYP17A1 | 3.707763251  | 0.003104 |
| ENSG00000140505 | CYP1A2  | -4.281484746 | 0.000706 |
| ENSG00000019186 | CYP24A1 | 4.180789667  | 1.79E-15 |
| ENSG00000135929 | CYP27A1 | -1.769148207 | 9.91E-12 |
| ENSG00000111012 | CYP27B1 | 2.189729436  | 3.15E-09 |
| ENSG00000186684 | CYP27C1 | 1.246309084  | 1.2E-09  |
| ENSG00000100197 | CYP2D6  | -1.781307751 | 0.036853 |
| ENSG00000155016 | CYP2U1  | -1.505792637 | 2.98E-10 |
| ENSG00000073067 | CYP2W1  | -2.498315785 | 2.74E-08 |
| ENSG00000036530 | CYP46A1 | -1.861129881 | 6.14E-06 |
| ENSG00000187048 | CYP4A11 | -2.952525506 | 0.045849 |
| ENSG00000171903 | CYP4F11 | 2.143675679  | 0.002077 |
| ENSG00000186115 | CYP4F2  | 3.232174609  | 0.004831 |
| ENSG00000171954 | CYP4F22 | 3.087709925  | 1.76E-12 |
| ENSG00000145476 | CYP4V2  | -1.431620383 | 4.29E-05 |
| ENSG00000186377 | CYP4X1  | -1.83442776  | 5.23E-07 |
| ENSG00000186160 | CYP4Z1  | -3.077409226 | 0.000778 |
| ENSG00000205795 | CYS1    | -1.906291667 | 2.65E-07 |
| ENSG00000173198 | CYSLTR1 | -1.7160567   | 0.000125 |
| ENSG00000197191 | CYSRT1  | 4.047843078  | 9.15E-24 |
| ENSG00000120306 | CYSTM1  | -1.432867381 | 5.35E-09 |
| ENSG00000146122 | DAAM2   | -1.865548146 | 1.78E-08 |
| ENSG00000153071 | DAB2    | -1.472202128 | 3.12E-05 |
| ENSG00000276644 | DACH1   | -1.245247535 | 0.006966 |
| ENSG00000165617 | DACT1   | -2.031272035 | 6.74E-11 |
| ENSG00000164488 | DACT2   | -1.953577621 | 2.04E-07 |
| ENSG00000197380 | DACT3   | -1.779365793 | 1.31E-11 |
| ENSG00000134780 | DAGLA   | -1.822795425 | 4.39E-05 |
| ENSG00000196730 | DAPK1   | -1.671527919 | 9.81E-10 |
| ENSG00000163331 | DAPL1   | 1.009239534  | 0.000544 |
| ENSG00000070190 | DAPP1   | 1.090292558  | 2.4E-05  |
| ENSG00000006634 | DBF4    | 1.022218328  | 1.63E-05 |
| ENSG00000155368 | DBI     | 1.178540536  | 1.55E-07 |

|                 |          |              |          |
|-----------------|----------|--------------|----------|
| ENSG00000113758 | DBN1     | -1.415785922 | 3.27E-09 |
| ENSG00000198354 | DCAF12L2 | -3.969192599 | 9.31E-05 |
| ENSG00000164934 | DCAF13   | 1.015531803  | 4.1E-06  |
| ENSG00000161634 | DCD      | -4.583251364 | 2.67E-10 |
| ENSG00000170959 | DCDC1    | -4.041142044 | 9.42E-05 |
| ENSG00000166341 | DCHS1    | -1.093733054 | 0.015707 |
| ENSG00000133083 | DCLK1    | -1.816973301 | 1.39E-06 |
| ENSG00000170390 | DCLK2    | -1.4184275   | 0.007151 |
| ENSG00000011465 | DCN      | -1.257724426 | 0.000206 |
| ENSG00000163357 | DCST1    | -1.854597905 | 0.008388 |
| ENSG00000163354 | DCST2    | -2.185447101 | 5.36E-06 |
| ENSG00000080166 | DCT      | -1.115382444 | 0.006807 |
| ENSG00000137692 | DCUN1D5  | 1.33031782   | 3.99E-06 |
| ENSG00000077279 | DCX      | -3.252083991 | 5.97E-06 |
| ENSG00000153904 | DDAH1    | -1.681050707 | 4.54E-10 |
| ENSG00000165490 | DDIAS    | 1.716153719  | 4.44E-05 |
| ENSG00000145358 | DDIT4L   | -2.389228774 | 5.68E-12 |
| ENSG00000181418 | DDN      | 2.710310143  | 0.001944 |
| ENSG00000203797 | DDO      | -2.235836015 | 0.000113 |
| ENSG00000162733 | DDR2     | -2.260125064 | 1.18E-12 |
| ENSG00000107201 | DDX58    | 1.527619705  | 3.24E-09 |
| ENSG00000137628 | DDX60    | 1.051964748  | 0.001372 |
| ENSG00000164825 | DEFB1    | 1.124806613  | 0.00054  |
| ENSG00000180383 | DEFB124  | -3.246446858 | 0.000859 |
| ENSG00000186458 | DEFB132  | -4.146103943 | 0.008396 |
| ENSG00000171711 | DEFB4A   | 8.956750104  | 7.64E-08 |
| ENSG00000143753 | DEGS1    | 1.03369257   | 2.89E-07 |
| ENSG00000168350 | DEGS2    | 1.864335182  | 4.32E-09 |
| ENSG00000146966 | DENND2A  | -2.788817713 | 1.15E-10 |
| ENSG00000175984 | DENND2C  | 1.44811355   | 3.21E-14 |
| ENSG00000162777 | DENND2D  | 1.395938466  | 1.54E-12 |
| ENSG00000105339 | DENND3   | -1.344078508 | 5.13E-05 |
| ENSG00000170456 | DENND5B  | -1.337607155 | 4.5E-07  |
| ENSG00000024526 | DEPDC1   | 1.399090457  | 4.5E-05  |
| ENSG00000035499 | DEPDC1B  | 2.709350678  | 4E-11    |
| ENSG00000121690 | DEPDC7   | 1.112733626  | 1.54E-07 |
| ENSG00000165507 | DEPP1    | -2.062315734 | 3.89E-13 |
| ENSG00000175084 | DES      | -3.14519535  | 1.92E-05 |
| ENSG00000140543 | DET1     | -1.285218551 | 1.96E-07 |
| ENSG00000136267 | DGKB     | -2.680270862 | 0.008658 |
| ENSG00000077044 | DGKD     | -1.010435645 | 0.000136 |
| ENSG00000058866 | DGKG     | -2.17240475  | 1.3E-11  |
| ENSG00000157680 | DGKI     | -1.667024852 | 0.000234 |
| ENSG00000157379 | DHRS1    | 1.204347936  | 3.45E-06 |
| ENSG00000102796 | DHRS12   | -1.171402956 | 0.000903 |
| ENSG00000089876 | DHX32    | 1.157986109  | 1.73E-07 |
| ENSG00000197406 | DIO3     | -3.446443328 | 3.69E-06 |
| ENSG00000151240 | DIP2C    | -1.435685435 | 1.23E-10 |

|                 |          |              |          |
|-----------------|----------|--------------|----------|
| ENSG00000154309 | DISP1    | -1.143833105 | 1.83E-05 |
| ENSG00000150764 | DIXDC1   | -1.603216154 | 1.43E-13 |
| ENSG00000107984 | DKK1     | -2.267019128 | 0.000164 |
| ENSG00000155011 | DKK2     | -3.172026064 | 3.51E-09 |
| ENSG00000164741 | DLC1     | -1.867405506 | 2.69E-08 |
| ENSG00000008226 | DLEC1    | -2.329521082 | 0.000125 |
| ENSG00000126787 | DLGAP5   | 2.679226434  | 1.76E-12 |
| ENSG00000171462 | DLK2     | -1.274564344 | 0.000615 |
| ENSG00000128917 | DLL4     | -1.189741504 | 0.009199 |
| ENSG00000115844 | DLX2     | 2.289279246  | 0.000727 |
| ENSG00000105880 | DLX5     | 2.039163507  | 3.47E-15 |
| ENSG00000006377 | DLX6     | 1.922760194  | 0.003731 |
| ENSG00000198947 | DMD      | -1.573908353 | 9.71E-18 |
| ENSG00000132837 | DMGDH    | -1.667560008 | 0.007251 |
| ENSG00000161249 | DMKN     | 1.53233356   | 9.72E-16 |
| ENSG00000173253 | DMRT2    | -2.203468205 | 0.046041 |
| ENSG00000176399 | DMRTA1   | 1.456454596  | 0.007954 |
| ENSG00000165506 | DNAAF2   | 1.046093624  | 0.035223 |
| ENSG00000167646 | DNAAF3   | 1.698768423  | 0.032934 |
| ENSG00000114841 | DNAH1    | -1.354090218 | 8.65E-05 |
| ENSG00000250091 | DNAH10OS | -1.288261618 | 0.020044 |
| ENSG00000105877 | DNAH11   | -2.277679066 | 0.00035  |
| ENSG00000115423 | DNAH6    | -1.45242719  | 0.023967 |
| ENSG00000118997 | DNAH7    | -1.41897573  | 0.021716 |
| ENSG00000132002 | DNAJB1   | 1.035233221  | 0.000173 |
| ENSG00000105993 | DNAJB6   | 1.462095012  | 1.26E-09 |
| ENSG00000178401 | DNAJC22  | -1.909475488 | 2.23E-06 |
| ENSG00000163879 | DNALI1   | -2.035883641 | 2.25E-07 |
| ENSG00000167968 | DNASE1L2 | 1.924037598  | 1.48E-05 |
| ENSG00000163687 | DNASE1L3 | 1.394313683  | 1.13E-08 |
| ENSG00000187957 | DNER     | -2.134594504 | 1.87E-07 |
| ENSG00000179532 | DNHD1    | -1.031927361 | 0.002091 |
| ENSG00000106976 | DNM1     | -1.348582168 | 0.000342 |
| ENSG00000088305 | DNMT3B   | 1.696607819  | 1.64E-16 |
| ENSG00000115325 | DOK1     | -1.312538251 | 0.000271 |
| ENSG00000147443 | DOK2     | -1.098206382 | 0.03957  |
| ENSG00000146094 | DOK3     | 1.326411678  | 0.001142 |
| ENSG00000125170 | DOK4     | 1.150545226  | 8.59E-08 |
| ENSG00000101134 | DOK5     | -1.389489645 | 0.000454 |
| ENSG00000206052 | DOK6     | -2.73579884  | 7.72E-08 |
| ENSG00000175920 | DOK7     | -2.750723505 | 0.006077 |
| ENSG00000166171 | DPCD     | 1.094527233  | 1.66E-05 |
| ENSG00000011332 | DPF1     | 2.711590575  | 1.17E-06 |
| ENSG00000197635 | DPP4     | 1.57085253   | 4.72E-08 |
| ENSG00000130226 | DPP6     | -2.704315484 | 1.64E-09 |
| ENSG00000143196 | DPT      | -2.693538529 | 3.19E-11 |
| ENSG00000177990 | DPY19L2  | -1.174868965 | 0.007477 |
| ENSG00000092964 | DPYSL2   | -1.129754302 | 4.54E-06 |



|                 |          |              |          |
|-----------------|----------|--------------|----------|
| ENSG00000113657 | DPYSL3   | -1.64062719  | 4.22E-08 |
| ENSG00000175550 | DRAP1    | 1.362077578  | 1.29E-06 |
| ENSG00000162490 | DRAXIN   | -2.296980283 | 1.62E-05 |
| ENSG00000171962 | DRC3     | -1.380004686 | 0.000125 |
| ENSG00000184845 | DRD1     | -2.410993969 | 0.002054 |
| ENSG00000069696 | DRD4     | -4.530659368 | 1.01E-09 |
| ENSG00000189269 | DRICH1   | -1.557758822 | 0.043686 |
| ENSG00000134765 | DSC1     | 2.994950303  | 6.56E-21 |
| ENSG00000134755 | DSC2     | 3.117872862  | 4.45E-17 |
| ENSG00000134762 | DSC3     | 1.184648749  | 4.03E-10 |
| ENSG00000177103 | DSCAML1  | -2.273015586 | 0.00076  |
| ENSG00000171451 | DSEL     | -1.528154512 | 2.31E-07 |
| ENSG00000134760 | DSG1     | 2.720387546  | 5.11E-20 |
| ENSG00000046604 | DSG2     | -1.473466681 | 2.81E-12 |
| ENSG00000134757 | DSG3     | 2.351347511  | 1.89E-17 |
| ENSG00000175065 | DSG4     | 2.22034973   | 0.044628 |
| ENSG00000096696 | DSP      | 1.191148595  | 4.53E-12 |
| ENSG00000143476 | DTL      | 1.058423253  | 0.000808 |
| ENSG00000134769 | DTNA     | -2.294323595 | 2.77E-13 |
| ENSG00000135144 | DTX1     | -2.843101321 | 4.71E-10 |
| ENSG00000110042 | DTX4     | -1.635238911 | 1.86E-07 |
| ENSG00000137857 | DUOX1    | 1.415381694  | 2.99E-11 |
| ENSG00000140254 | DUOXA1   | 1.615281384  | 3.16E-14 |
| ENSG00000144048 | DUSP11   | 1.129358457  | 3.77E-06 |
| ENSG00000276023 | DUSP14   | 2.332999756  | 2.18E-13 |
| ENSG00000158050 | DUSP2    | 1.159820489  | 0.000408 |
| ENSG00000198842 | DUSP27   | -2.622934065 | 0.027523 |
| ENSG00000138166 | DUSP5    | 1.241103978  | 3.48E-05 |
| ENSG00000164086 | DUSP7    | 1.170349866  | 1.74E-07 |
| ENSG00000130829 | DUSP9    | 5.434074278  | 1.82E-08 |
| ENSG00000178690 | DYNAP    | 3.460950959  | 0.003548 |
| ENSG00000158560 | DYNC111  | -1.893103749 | 5.16E-10 |
| ENSG00000187240 | DYNC2H1  | -1.097092622 | 0.000537 |
| ENSG00000088986 | DYNLL1   | 2.200110893  | 4.41E-19 |
| ENSG00000168589 | DYNLRB2  | -1.10746988  | 0.000343 |
| ENSG00000165169 | DYNLT3   | 1.294002899  | 0.000112 |
| ENSG00000158163 | DZIP1L   | -1.883220442 | 5.68E-06 |
| ENSG00000198919 | DZIP3    | -1.413116155 | 3.51E-06 |
| ENSG00000007968 | E2F2     | 1.037981766  | 1.03E-05 |
| ENSG00000165891 | E2F7     | 1.975898875  | 4.84E-08 |
| ENSG00000129173 | E2F8     | 1.385598656  | 9.59E-07 |
| ENSG00000144597 | EAF1     | 1.143826282  | 1.53E-06 |
| ENSG00000164330 | EBF1     | -2.231883731 | 6.71E-09 |
| ENSG00000221818 | EBF2     | -2.033319721 | 2.05E-06 |
| ENSG00000108001 | EBF3     | -1.805918812 | 1.45E-06 |
| ENSG00000117395 | EBNA1BP2 | 1.013556593  | 4.39E-05 |
| ENSG00000143369 | ECM1     | 2.105667429  | 5.45E-11 |
| ENSG00000106823 | ECM2     | -2.450786333 | 3.18E-13 |



|                 |           |              |          |
|-----------------|-----------|--------------|----------|
| ENSG00000114346 | ECT2      | 1.651049419  | 3.52E-05 |
| ENSG00000203734 | ECT2L     | -2.757624284 | 0.001037 |
| ENSG00000158813 | EDA       | -1.543557323 | 1.42E-12 |
| ENSG00000135960 | EDAR      | -2.434889458 | 8.55E-08 |
| ENSG00000124205 | EDN3      | -3.995389259 | 1.53E-08 |
| ENSG00000101210 | EEF1A2    | 1.257543459  | 0.002995 |
| ENSG00000284753 | EEF1AKMT4 | 2.127357897  | 1.68E-05 |
| ENSG00000114942 | EEF1B2    | 1.112870438  | 1.43E-06 |
| ENSG00000172771 | EFCAB12   | -2.652047815 | 0.02067  |
| ENSG00000178852 | EFCAB13   | -1.804351888 | 4.11E-06 |
| ENSG00000186976 | EFCAB6    | -1.330418562 | 0.00039  |
| ENSG00000114654 | EFCC1     | -1.16251181  | 0.031494 |
| ENSG00000115380 | EFEMP1    | -1.302683997 | 1.02E-07 |
| ENSG00000172638 | EFEMP2    | -1.287453678 | 7.49E-05 |
| ENSG00000115468 | EFHD1     | -2.688318043 | 5.57E-11 |
| ENSG00000084710 | EFR3B     | 1.411605125  | 9.62E-06 |
| ENSG00000138798 | EGF       | -2.038513178 | 5.16E-08 |
| ENSG00000198759 | EGFL6     | -2.351002001 | 0.000425 |
| ENSG00000172889 | EGFL7     | -1.355863047 | 7.09E-05 |
| ENSG00000241404 | EGFL8     | -1.011690876 | 0.035931 |
| ENSG00000179388 | EGR3      | 1.102206261  | 6.09E-07 |
| ENSG00000176401 | EID2B     | -1.944394955 | 0.001109 |
| ENSG00000119718 | EIF2B2    | 1.001845681  | 0.000339 |
| ENSG00000141543 | EIF4A3    | 1.404054926  | 3.42E-09 |
| ENSG00000151247 | EIF4E     | 1.178035349  | 1.6E-06  |
| ENSG00000187840 | EIF4EBP1  | 2.309476615  | 1.85E-14 |
| ENSG00000110321 | EIF4G2    | 1.10622569   | 5.18E-05 |
| ENSG00000132507 | EIF5A     | 1.586854332  | 3.07E-11 |
| ENSG00000253626 | EIF5AL1   | 1.37531249   | 0.000409 |
| ENSG00000242372 | EIF6      | 1.902512036  | 4.21E-11 |
| ENSG00000197561 | ELANE     | -2.059004034 | 0.017229 |
| ENSG00000196361 | ELAVL3    | 4.795180838  | 3.68E-06 |
| ENSG00000163435 | ELF3      | -1.523509483 | 3.88E-06 |
| ENSG00000135374 | ELF5      | -1.529401065 | 2.13E-05 |
| ENSG00000166897 | ELFN2     | -1.840962521 | 0.014076 |
| ENSG00000118985 | ELL2      | 2.043197286  | 3.9E-13  |
| ENSG00000128886 | ELL3      | 2.255168938  | 0.018593 |
| ENSG00000155849 | ELMO1     | -1.190856131 | 6.17E-05 |
| ENSG00000110675 | ELMOD1    | 2.18647641   | 8.36E-15 |
| ENSG00000049540 | ELN       | -2.003451092 | 2.59E-06 |
| ENSG00000066322 | ELOVL1    | 1.583933674  | 4.23E-06 |
| ENSG00000197977 | ELOVL2    | -4.09994366  | 1.25E-08 |
| ENSG00000118402 | ELOVL4    | 2.568836147  | 7E-20    |
| ENSG00000012660 | ELOVL5    | -1.757397233 | 3.84E-07 |
| ENSG00000164181 | ELOVL7    | 2.337981579  | 1.99E-15 |
| ENSG00000164035 | EMCN      | -1.384332625 | 0.000196 |
| ENSG00000186998 | EMID1     | -1.047864704 | 0.019374 |
| ENSG00000138080 | EMILIN1   | -1.381234428 | 0.000401 |

|                 |         |              |          |
|-----------------|---------|--------------|----------|
| ENSG00000183798 | EMILIN3 | -3.315256744 | 1.27E-12 |
| ENSG00000066629 | EML1    | 1.743741472  | 2.28E-11 |
| ENSG00000214595 | EML6    | 1.143587145  | 1.98E-11 |
| ENSG00000135638 | EMX1    | 3.004850306  | 0.040186 |
| ENSG00000170370 | EMX2    | -1.994946496 | 1.72E-14 |
| ENSG00000163064 | EN1     | -1.192826342 | 0.000129 |
| ENSG00000164778 | EN2     | 2.907934652  | 0.007084 |
| ENSG00000154380 | ENAH    | 1.231968576  | 2.37E-07 |
| ENSG00000149218 | ENDOD1  | 1.022773046  | 0.000391 |
| ENSG00000111405 | ENDOU   | 2.008917255  | 1.11E-10 |
| ENSG00000168913 | ENHO    | -3.438920412 | 4.38E-09 |
| ENSG00000151023 | ENKUR   | 1.494557159  | 0.007672 |
| ENSG00000074800 | ENO1    | 1.296597567  | 5.82E-06 |
| ENSG00000197594 | ENPP1   | -2.579647722 | 6.22E-09 |
| ENSG00000136960 | ENPP2   | -1.984405626 | 1.28E-10 |
| ENSG00000154269 | ENPP3   | -2.050258781 | 2.46E-07 |
| ENSG00000001561 | ENPP4   | -2.988633045 | 6.16E-25 |
| ENSG00000112796 | ENPP5   | -2.704358424 | 5.76E-08 |
| ENSG00000168032 | ENTPD3  | 1.033544553  | 2E-05    |
| ENSG00000198018 | ENTPD7  | 1.388335206  | 2.64E-07 |
| ENSG00000088367 | EPB41L1 | -1.661170711 | 1.27E-11 |
| ENSG00000079819 | EPB41L2 | -1.972273488 | 8.46E-13 |
| ENSG00000166947 | EPB42   | -5.394738603 | 2.84E-08 |
| ENSG00000119888 | EPCAM   | -1.469996985 | 5.23E-07 |
| ENSG00000086289 | EPDR1   | -2.645402622 | 2.66E-24 |
| ENSG00000182585 | EPGN    | 9.089336471  | 2.26E-20 |
| ENSG00000146904 | EPHA1   | 1.600393885  | 5.6E-10  |
| ENSG00000044524 | EPHA3   | -1.487707558 | 0.005695 |
| ENSG00000135333 | EPHA7   | -2.144413354 | 4.54E-05 |
| ENSG00000070886 | EPHA8   | 3.891944195  | 0.040964 |
| ENSG00000154928 | EPHB1   | -2.119912448 | 7.39E-23 |
| ENSG00000143819 | EPHX1   | -1.655520475 | 7.57E-17 |
| ENSG00000105131 | EPHX3   | 3.116235157  | 5.71E-25 |
| ENSG00000172031 | EPHX4   | -1.985091311 | 0.003676 |
| ENSG00000112425 | EPM2A   | -1.035023713 | 6.95E-06 |
| ENSG00000063245 | EPN1    | 1.009974019  | 0.000213 |
| ENSG00000049283 | EPN3    | 2.041396192  | 8.85E-11 |
| ENSG00000130427 | EPO     | 5.206020649  | 1.65E-06 |
| ENSG00000273604 | EPOP    | 1.788620663  | 6.01E-07 |
| ENSG00000187266 | EPOR    | -1.075421181 | 0.017766 |
| ENSG00000151491 | EPS8    | -1.644088105 | 3.14E-12 |
| ENSG00000131037 | EPS8L1  | 1.242628867  | 3.81E-06 |
| ENSG00000133106 | EPSTI1  | 1.67268519   | 6.15E-05 |
| ENSG00000178568 | ERBB4   | -3.372605179 | 3.66E-15 |
| ENSG00000186871 | ERCC6L  | 2.181081062  | 7.32E-06 |
| ENSG00000124882 | EREG    | 4.674662743  | 5.14E-27 |
| ENSG00000178752 | ERFE    | 3.878182178  | 1.56E-05 |
| ENSG00000204334 | ERICH2  | -2.711916078 | 0.005455 |

|                 |            |              |          |
|-----------------|------------|--------------|----------|
| ENSG00000178965 | ERICH3     | -2.347302177 | 0.025605 |
| ENSG00000134398 | ERN2       | -2.454052708 | 0.020088 |
| ENSG00000197930 | ERO1A      | 1.242395302  | 5.49E-07 |
| ENSG00000086619 | ERO1B      | -1.298893275 | 0.000164 |
| ENSG00000244476 | ERVFRD-1   | -3.216145134 | 0.004702 |
| ENSG00000226887 | ERVMER34-1 | 3.631223983  | 4.28E-09 |
| ENSG00000242950 | ERVW-1     | 3.902837264  | 0.005344 |
| ENSG00000171320 | ESCO2      | 1.325744883  | 0.000482 |
| ENSG00000135476 | ESPL1      | 1.260994288  | 0.00019  |
| ENSG00000187017 | ESPN       | -1.020370737 | 0.017457 |
| ENSG00000091831 | ESR1       | -1.097044152 | 0.009805 |
| ENSG00000104413 | ESRP1      | 1.634154904  | 3.59E-12 |
| ENSG00000103067 | ESRP2      | 1.513082524  | 2.71E-12 |
| ENSG00000196482 | ESRRG      | -3.170494199 | 8.48E-09 |
| ENSG00000158220 | ESYT3      | 1.672061263  | 2.06E-11 |
| ENSG00000143845 | ETNK2      | -1.224143212 | 0.000239 |
| ENSG00000006468 | ETV1       | -1.620215961 | 5.42E-07 |
| ENSG00000214860 | EVPLL      | 1.155308956  | 0.02362  |
| ENSG00000174371 | EXO1       | 1.768016686  | 0.000124 |
| ENSG00000250821 | EXOC1L     | -3.837448548 | 0.008836 |
| ENSG00000178896 | EXOSC4     | 1.126453562  | 9.14E-06 |
| ENSG00000158008 | EXTL1      | -3.11523584  | 3.1E-09  |
| ENSG00000112319 | EYA4       | -3.52874539  | 0.000102 |
| ENSG00000188107 | EYS        | -2.524687491 | 0.005149 |
| ENSG00000106462 | EZH2       | 1.003815745  | 1.47E-07 |
| ENSG00000126218 | F10        | -2.104143355 | 2.63E-05 |
| ENSG00000131187 | F12        | 3.019333102  | 2.06E-13 |
| ENSG00000124491 | F13A1      | -1.421451858 | 0.000793 |
| ENSG00000164251 | F2RL1      | 1.938096622  | 2.89E-11 |
| ENSG00000198734 | F5         | -2.292960023 | 1.49E-06 |
| ENSG00000057593 | F7         | -2.384297968 | 0.004819 |
| ENSG00000185010 | F8         | -1.827228323 | 6.51E-16 |
| ENSG00000103089 | FA2H       | -1.779712918 | 0.005934 |
| ENSG00000165591 | FAAH2      | 1.253930386  | 2.68E-06 |
| ENSG00000121769 | FABP3      | -1.806581059 | 0.002956 |
| ENSG00000170323 | FABP4      | -3.399264095 | 7.16E-10 |
| ENSG00000164687 | FABP5      | 4.702082575  | 8.56E-74 |
| ENSG00000164434 | FABP7      | -3.042961433 | 0.000126 |
| ENSG00000205186 | FABP9      | 3.468499771  | 0.036594 |
| ENSG00000149485 | FADS1      | -1.664310927 | 0.010544 |
| ENSG00000134824 | FADS2      | -1.825022458 | 0.023726 |
| ENSG00000221968 | FADS3      | -1.724586153 | 6.81E-05 |
| ENSG00000172782 | FADS6      | 1.115271845  | 0.00265  |
| ENSG00000144199 | FAHD2B     | -1.09125157  | 9.15E-09 |
| ENSG00000135472 | FAIM2      | 1.814731415  | 2.24E-06 |
| ENSG00000168309 | FAM107A    | -2.411105772 | 1.24E-12 |
| ENSG00000125898 | FAM110A    | 1.651953267  | 3.62E-08 |
| ENSG00000169122 | FAM110B    | -1.661540201 | 1.95E-07 |

|                 |          |              |          |
|-----------------|----------|--------------|----------|
| ENSG00000184731 | FAM110C  | 2.226108553  | 9.67E-20 |
| ENSG00000197245 | FAM110D  | -1.611494434 | 7.05E-05 |
| ENSG00000189057 | FAM111B  | 1.641930036  | 3.34E-06 |
| ENSG00000121104 | FAM117A  | -1.687618672 | 9.96E-14 |
| ENSG00000136830 | FAM129B  | 1.156558382  | 2.97E-06 |
| ENSG00000179083 | FAM133A  | -3.037996431 | 1.25E-06 |
| ENSG00000082269 | FAM135A  | 1.067894092  | 1.09E-09 |
| ENSG00000147724 | FAM135B  | -2.253387975 | 0.004611 |
| ENSG00000138640 | FAM13A   | -1.699269342 | 4.42E-11 |
| ENSG00000148541 | FAM13C   | -1.189722167 | 5.93E-06 |
| ENSG00000109794 | FAM149A  | -2.077031502 | 4.2E-07  |
| ENSG00000152380 | FAM151B  | 1.203183413  | 0.00231  |
| ENSG00000170074 | FAM153A  | -1.184790073 | 0.03085  |
| ENSG00000204677 | FAM153C  | -1.780039144 | 0.048071 |
| ENSG00000164142 | FAM160A1 | 1.051613978  | 3.98E-09 |
| ENSG00000156050 | FAM161B  | -1.040289017 | 7.88E-05 |
| ENSG00000114023 | FAM162A  | 1.66598006   | 4.16E-12 |
| ENSG00000183807 | FAM162B  | -1.330259036 | 0.002959 |
| ENSG00000188163 | FAM166A  | -1.532083166 | 0.010252 |
| ENSG00000215187 | FAM166B  | -3.356132979 | 2.17E-11 |
| ENSG00000148468 | FAM171A1 | -1.228211665 | 2.09E-06 |
| ENSG00000185442 | FAM174B  | -1.499520954 | 2.67E-08 |
| ENSG00000189320 | FAM180A  | -1.26921413  | 0.003871 |
| ENSG00000196666 | FAM180B  | -3.692728894 | 4.54E-12 |
| ENSG00000111879 | FAM184A  | -2.276445961 | 4.69E-11 |
| ENSG00000047662 | FAM184B  | -1.135451412 | 0.029397 |
| ENSG00000104059 | FAM189A1 | -2.335773976 | 1.73E-05 |
| ENSG00000135063 | FAM189A2 | -2.666807473 | 7.53E-19 |
| ENSG00000204767 | FAM196B  | -1.927365002 | 0.047308 |
| ENSG00000164125 | FAM198B  | -1.571791098 | 3.53E-09 |
| ENSG00000198673 | FAM19A2  | -1.929742389 | 0.000414 |
| ENSG00000219438 | FAM19A5  | -1.879156803 | 6.33E-06 |
| ENSG00000250486 | FAM218A  | -2.120361175 | 0.015302 |
| ENSG00000188732 | FAM221A  | -2.012903352 | 3.49E-09 |
| ENSG00000184949 | FAM227A  | -1.444753149 | 0.000269 |
| ENSG00000219626 | FAM228B  | -1.644743695 | 1.44E-08 |
| ENSG00000203778 | FAM229B  | -1.479003015 | 9.96E-08 |
| ENSG00000171224 | FAM241B  | -1.316615553 | 0.000568 |
| ENSG00000188100 | FAM25A   | 3.947241175  | 3.71E-16 |
| ENSG00000276430 | FAM25C   | 2.227953273  | 0.004183 |
| ENSG00000183844 | FAM3B    | -2.703396491 | 0.000668 |
| ENSG00000198643 | FAM3D    | -2.589832987 | 5.17E-09 |
| ENSG00000185112 | FAM43A   | 1.693793057  | 2.91E-09 |
| ENSG00000183114 | FAM43B   | 2.314507484  | 0.002736 |
| ENSG00000189157 | FAM47E   | -2.640452512 | 0.000547 |
| ENSG00000149926 | FAM57B   | -1.95444027  | 0.016951 |
| ENSG00000165716 | FAM69B   | -1.840965219 | 5.82E-09 |
| ENSG00000205085 | FAM71F2  | -1.161051126 | 0.006398 |

|                 |        |              |          |
|-----------------|--------|--------------|----------|
| ENSG00000263513 | FAM72C | 3.190205417  | 0.00524  |
| ENSG00000215784 | FAM72D | 1.984002713  | 0.040393 |
| ENSG00000157470 | FAM81A | -1.038756219 | 0.030176 |
| ENSG00000147689 | FAM83A | 3.805041157  | 3.22E-17 |
| ENSG00000168143 | FAM83B | 1.734527667  | 7.7E-16  |
| ENSG00000125998 | FAM83C | 2.210445297  | 3.91E-21 |
| ENSG00000101447 | FAM83D | 2.628764759  | 3.19E-10 |
| ENSG00000105523 | FAM83E | -2.190710065 | 4.27E-07 |
| ENSG00000188522 | FAM83G | 1.792512392  | 1.14E-11 |
| ENSG00000180921 | FAM83H | 1.489986417  | 3.22E-10 |
| ENSG00000162981 | FAM84A | 1.192601862  | 6.24E-07 |
| ENSG00000182118 | FAM89A | 1.329999568  | 4.73E-07 |
| ENSG00000188343 | FAM92A | -1.187133406 | 3.12E-05 |
| ENSG00000283486 | FAM95C | -2.185767058 | 0.020122 |
| ENSG00000181544 | FANCB  | 1.606259157  | 0.004954 |
| ENSG00000064763 | FAR2   | -1.635694487 | 0.006424 |
| ENSG00000152767 | FARP1  | -1.409155112 | 1.22E-06 |
| ENSG00000169710 | FASN   | -1.13665615  | 0.021864 |
| ENSG00000165323 | FAT3   | -1.990785435 | 1.01E-08 |
| ENSG00000196159 | FAT4   | -1.32836141  | 6.57E-05 |
| ENSG00000170271 | FAXDC2 | -2.116917156 | 1.1E-15  |
| ENSG00000162458 | FBLIM1 | 1.536638208  | 2.63E-08 |
| ENSG00000077942 | FBLN1  | -1.867327119 | 1.13E-09 |
| ENSG00000163520 | FBLN2  | -2.138212215 | 1.02E-09 |
| ENSG00000140092 | FBLN5  | -2.545251417 | 4.25E-14 |
| ENSG00000138829 | FBN2   | 1.341350249  | 0.022134 |
| ENSG00000165140 | FBP1   | -2.212134679 | 7.85E-12 |
| ENSG00000099364 | FBXL19 | 1.173635613  | 1.22E-06 |
| ENSG00000197361 | FBXL22 | -1.282557399 | 0.00047  |
| ENSG00000183580 | FBXL7  | -1.693573005 | 2.28E-07 |
| ENSG00000147912 | FBXO10 | 1.238524445  | 6.75E-06 |
| ENSG00000143756 | FBXO28 | 1.010487819  | 1.19E-05 |
| ENSG00000156804 | FBXO32 | -1.900280002 | 1.94E-09 |
| ENSG00000174013 | FBXO45 | 2.409339514  | 4.18E-14 |
| ENSG00000112029 | FBXO5  | 1.285934753  | 1.82E-05 |
| ENSG00000171931 | FBXW10 | 2.751002274  | 0.011902 |
| ENSG00000104921 | FCER2  | -3.539794866 | 0.00039  |
| ENSG00000275395 | FCGBP  | -1.073433356 | 0.008722 |
| ENSG00000162747 | FCGR3B | 5.096605336  | 9.59E-08 |
| ENSG00000104870 | FCGRT  | -1.298985066 | 1.54E-09 |
| ENSG00000130475 | FCHO1  | 1.284006469  | 2.51E-05 |
| ENSG00000197948 | FCHSD1 | 1.540556537  | 1.49E-08 |
| ENSG00000132185 | FCRLA  | 1.799896486  | 0.001778 |
| ENSG00000162746 | FCRLB  | 2.078356534  | 0.003148 |
| ENSG00000161513 | FDXR   | 1.17991153   | 5.84E-07 |
| ENSG00000101311 | FERMT1 | 1.166898855  | 1.66E-07 |
| ENSG00000073712 | FERMT2 | -1.985824498 | 3.12E-14 |
| ENSG00000090512 | FETUB  | 3.296784821  | 1.04E-08 |

|                 |        |              |          |
|-----------------|--------|--------------|----------|
| ENSG00000126262 | FFAR2  | 1.077996211  | 0.044261 |
| ENSG00000186188 | FFAR4  | -2.313554151 | 8.27E-10 |
| ENSG00000146192 | FGD2   | 1.793101871  | 1.06E-09 |
| ENSG00000154783 | FGD5   | -1.616839995 | 1.12E-06 |
| ENSG00000113578 | FGF1   | -2.241547505 | 4.82E-08 |
| ENSG00000070193 | FGF10  | -1.766729483 | 5.27E-05 |
| ENSG00000161958 | FGF11  | 1.103536035  | 5.46E-10 |
| ENSG00000114279 | FGF12  | -1.216564933 | 0.011984 |
| ENSG00000129682 | FGF13  | -2.905103994 | 1.03E-15 |
| ENSG00000102466 | FGF14  | -2.036674501 | 0.035348 |
| ENSG00000156427 | FGF18  | -1.107047756 | 0.00386  |
| ENSG00000138685 | FGF2   | -2.446786707 | 4.23E-15 |
| ENSG00000140285 | FGF7   | -1.623097257 | 1.99E-06 |
| ENSG00000102678 | FGF9   | -3.77192173  | 2.57E-05 |
| ENSG00000137440 | FGFBP1 | 3.850579109  | 4.13E-20 |
| ENSG00000137441 | FGFBP2 | -2.89472361  | 1.58E-06 |
| ENSG00000077782 | FGFR1  | -1.777281442 | 1.65E-09 |
| ENSG00000127418 | FGFRL1 | -1.789115919 | 3.1E-11  |
| ENSG00000127951 | FGL2   | -1.45137876  | 3.88E-06 |
| ENSG00000137460 | FHDC1  | 1.791784098  | 4.7E-14  |
| ENSG00000022267 | FHL1   | -3.07634062  | 3.85E-16 |
| ENSG00000112214 | FHL5   | -1.641596121 | 0.002037 |
| ENSG00000134775 | FHOD3  | -1.795000504 | 1.82E-05 |
| ENSG00000176971 | FIBIN  | -1.634001998 | 4.23E-05 |
| ENSG00000182263 | FIGN   | -1.052091481 | 0.000749 |
| ENSG00000118407 | FILIP1 | -2.461925772 | 3.98E-12 |
| ENSG00000119782 | FKBP1B | 1.250417299  | 0.005307 |
| ENSG00000079150 | FKBP7  | -1.137823758 | 0.000194 |
| ENSG00000204315 | FKBPL  | 2.031699187  | 2.05E-14 |
| ENSG00000143631 | FLG    | 1.913866714  | 2.41E-08 |
| ENSG00000143520 | FLG2   | 1.779917014  | 1.24E-06 |
| ENSG00000151702 | FLI1   | -1.19652959  | 0.000364 |
| ENSG00000128591 | FLNC   | -1.796817172 | 1.41E-06 |
| ENSG00000126500 | FLRT1  | -3.620430911 | 0.00015  |
| ENSG00000125848 | FLRT3  | 2.065150231  | 8.03E-09 |
| ENSG00000037280 | FLT4   | -1.138110159 | 0.015933 |
| ENSG00000119686 | FLVCR2 | 1.344149211  | 0.004463 |
| ENSG00000155816 | FMN2   | -2.432823047 | 0.04847  |
| ENSG00000010932 | FMO1   | -1.593302941 | 4.74E-05 |
| ENSG00000007933 | FMO3   | -1.291032752 | 1.49E-05 |
| ENSG00000131781 | FMO5   | -1.844274146 | 1.55E-06 |
| ENSG00000122176 | FMOD   | -2.176428752 | 2.71E-12 |
| ENSG00000167363 | FN3K   | -2.057577024 | 6.23E-13 |
| ENSG00000137942 | FNBP1L | -1.056771925 | 5.62E-06 |
| ENSG00000228594 | FNDC10 | 1.638782178  | 3.49E-10 |
| ENSG00000160097 | FNDC5  | -3.215726237 | 1.15E-13 |
| ENSG00000110195 | FOLR1  | -3.48853341  | 3.06E-09 |
| ENSG00000165457 | FOLR2  | -1.835749697 | 9.68E-05 |

|                 |             |              |          |
|-----------------|-------------|--------------|----------|
| ENSG00000170345 | FOS         | 1.131257284  | 0.001699 |
| ENSG00000125740 | FOSB        | 1.188927202  | 0.015357 |
| ENSG00000175592 | FOSL1       | 6.203485013  | 2.14E-15 |
| ENSG00000129514 | FOXA1       | -3.619722686 | 1.05E-08 |
| ENSG00000054598 | FOXC1       | -1.678276485 | 8.22E-11 |
| ENSG00000251493 | FOXD1       | -1.296599539 | 0.023302 |
| ENSG00000186564 | FOXD2       | -1.853050527 | 0.046839 |
| ENSG00000187140 | FOXD3       | -1.970713579 | 0.014873 |
| ENSG00000178919 | FOX E1      | 2.632603921  | 3.59E-07 |
| ENSG00000168269 | FOXI1       | -2.96332705  | 4.77E-08 |
| ENSG00000186766 | FOXI2       | -2.790814528 | 4.62E-06 |
| ENSG00000183770 | FOXL2       | 2.547283054  | 0.038949 |
| ENSG00000111206 | FOX M1      | 1.674555172  | 4.22E-08 |
| ENSG00000109101 | FOX N1      | 1.573308645  | 9.05E-08 |
| ENSG00000204060 | FOX O6      | -1.197311085 | 0.036654 |
| ENSG00000164379 | FOX Q1      | -1.31480641  | 2.07E-11 |
| ENSG00000179772 | FOX S1      | -1.085628277 | 0.006918 |
| ENSG00000259030 | FPGT-TNNI3K | -2.90081052  | 8.48E-07 |
| ENSG00000171049 | FPR2        | 3.849747568  | 0.00059  |
| ENSG00000164946 | FREM1       | -2.566649521 | 1.29E-13 |
| ENSG00000153303 | FRMD1       | -3.455813693 | 0.00023  |
| ENSG00000165694 | FRMD7       | -4.080882354 | 0.000241 |
| ENSG00000126391 | FRMD8       | 1.444118892  | 1.15E-11 |
| ENSG00000070601 | FRMPD1      | 1.943957966  | 1.05E-06 |
| ENSG00000260230 | FRRS1L      | -3.069219377 | 5.05E-05 |
| ENSG00000162998 | FRZB        | -2.826048662 | 3E-18    |
| ENSG00000075618 | FSCN1       | 1.72427714   | 3.24E-09 |
| ENSG00000186628 | FSD2        | -3.069722759 | 0.03657  |
| ENSG00000188738 | FSIP2       | -2.284967644 | 0.000468 |
| ENSG00000134363 | FST         | -1.878046682 | 4.73E-07 |
| ENSG00000163430 | FSTL1       | -1.037088548 | 0.003434 |
| ENSG00000179163 | FUCA1       | -1.167700728 | 1.02E-09 |
| ENSG00000174951 | FUT1        | 1.588469542  | 1.28E-07 |
| ENSG00000176920 | FUT2        | 2.216904658  | 1.29E-14 |
| ENSG00000171124 | FUT3        | 2.893015665  | 7.45E-19 |
| ENSG00000172461 | FUT9        | -3.862352361 | 1.09E-06 |
| ENSG00000266964 | FX YD1      | -3.440054847 | 3.21E-05 |
| ENSG00000089356 | FX YD3      | 1.085768758  | 2.74E-05 |
| ENSG00000137726 | FX YD6      | -1.749562813 | 4.19E-07 |
| ENSG00000221946 | FX YD7      | -2.54028803  | 0.015462 |
| ENSG00000010810 | FYN         | -1.180277234 | 2.33E-06 |
| ENSG00000157240 | FZD1        | -1.535701054 | 1.1E-07  |
| ENSG00000174804 | FZD4        | -2.751691363 | 8.58E-15 |
| ENSG00000155760 | FZD7        | -1.441229129 | 5.66E-08 |
| ENSG00000177283 | FZD8        | -1.431665067 | 1.2E-06  |
| ENSG00000123689 | GOS2        | -3.369847427 | 6.88E-05 |
| ENSG00000131482 | G6PC        | 3.760761305  | 0.029105 |
| ENSG00000139112 | GABARAPL1   | -1.614560689 | 7.84E-16 |



|                 |         |              |          |
|-----------------|---------|--------------|----------|
| ENSG00000151834 | GABRA2  | -3.951184419 | 4.78E-06 |
| ENSG00000145864 | GABRB2  | -2.764085923 | 2.33E-05 |
| ENSG00000182256 | GABRG3  | -2.020241765 | 0.001056 |
| ENSG00000094755 | GABRP   | -2.296609113 | 0.000214 |
| ENSG00000268089 | GABRQ   | 1.990957751  | 2.33E-07 |
| ENSG00000128242 | GAL3ST1 | -3.481611716 | 0.00728  |
| ENSG00000108479 | GALK1   | 1.210829595  | 3.03E-07 |
| ENSG00000143891 | GALM    | -1.286987214 | 9.94E-06 |
| ENSG00000119514 | GALNT12 | -1.65918052  | 8.65E-08 |
| ENSG00000131386 | GALNT15 | -2.289891169 | 2.01E-07 |
| ENSG00000100626 | GALNT16 | -2.810253291 | 1.03E-15 |
| ENSG00000185274 | GALNT17 | -2.633214411 | 3.45E-12 |
| ENSG00000139629 | GALNT6  | 3.492156056  | 4.07E-64 |
| ENSG00000130035 | GALNT8  | -2.338273093 | 2.91E-06 |
| ENSG00000166573 | GALR1   | -3.152211167 | 0.000152 |
| ENSG00000213930 | GALT    | -1.084807338 | 0.000595 |
| ENSG00000172020 | GAP43   | -2.132033077 | 0.000452 |
| ENSG00000141441 | GAREM1  | 1.003589283  | 0.000115 |
| ENSG00000157833 | GAREM2  | -1.46916908  | 0.000523 |
| ENSG00000106105 | GARS    | 1.974640928  | 5.01E-17 |
| ENSG00000184502 | GAST    | 4.154029682  | 0.011818 |
| ENSG00000179348 | GATA2   | -1.600640993 | 4.06E-07 |
| ENSG00000141448 | GATA6   | -1.873255582 | 0.000253 |
| ENSG00000059691 | GATB    | 1.116036537  | 6.66E-06 |
| ENSG00000177628 | GBA     | 1.416231177  | 6.84E-06 |
| ENSG00000162654 | GBP4    | -1.608173044 | 1.92E-07 |
| ENSG00000183347 | GBP6    | 2.582577156  | 1.73E-12 |
| ENSG00000215644 | GCGR    | -2.168697017 | 0.006193 |
| ENSG00000131979 | GCH1    | 1.143704343  | 3.84E-05 |
| ENSG00000137880 | GCHFR   | -1.65923421  | 9.33E-13 |
| ENSG00000111846 | GCNT2   | -1.496399744 | 7.82E-09 |
| ENSG00000140297 | GCNT3   | 2.5456803    | 0.037894 |
| ENSG00000176928 | GCNT4   | 2.564081436  | 9.15E-15 |
| ENSG00000137878 | GCOM1   | 2.44276163   | 3.65E-05 |
| ENSG00000169224 | GCSAML  | -1.721812476 | 0.04323  |
| ENSG00000119125 | GDA     | 2.879514377  | 0.001463 |
| ENSG00000266524 | GDF10   | -2.82959801  | 3.01E-07 |
| ENSG00000125965 | GDF5    | -2.809445692 | 0.000226 |
| ENSG00000143869 | GDF7    | 1.113389118  | 0.046727 |
| ENSG00000168621 | GDNF    | 2.554854753  | 1.25E-10 |
| ENSG00000102886 | GDPD3   | 2.260808629  | 2.01E-18 |
| ENSG00000158555 | GDPD5   | -2.070887567 | 2.8E-10  |
| ENSG00000131095 | GFAP    | -2.534391836 | 1.24E-06 |
| ENSG00000141098 | GFOD2   | 1.564932356  | 1.78E-17 |
| ENSG00000151892 | GFRA1   | -3.033053363 | 4.83E-17 |
| ENSG00000168546 | GFRA2   | -1.780208189 | 0.0011   |
| ENSG00000146013 | GFRA3   | -2.465580097 | 9.77E-06 |
| ENSG00000006625 | GGCT    | 1.916102299  | 1.12E-26 |



|                 |          |              |          |
|-----------------|----------|--------------|----------|
| ENSG00000137563 | GGH      | 3.196883661  | 2.33E-26 |
| ENSG00000133475 | GGT2     | -2.895357675 | 0.002204 |
| ENSG00000099998 | GGT5     | -1.603849761 | 1.23E-05 |
| ENSG00000112964 | GHR      | -2.43168725  | 5.85E-17 |
| ENSG00000157017 | GHRL     | -2.582364026 | 4.59E-09 |
| ENSG00000101193 | GID8     | 1.241784542  | 1.95E-06 |
| ENSG00000213203 | GIMAP1   | -1.891705767 | 1.34E-06 |
| ENSG00000133574 | GIMAP4   | -1.471513571 | 1.16E-05 |
| ENSG00000133561 | GIMAP6   | -1.527061533 | 4.22E-09 |
| ENSG00000179144 | GIMAP7   | -1.44679169  | 3.35E-06 |
| ENSG00000171115 | GIMAP8   | -1.728015623 | 6.32E-09 |
| ENSG00000101003 | GINS1    | 1.611689713  | 6.64E-08 |
| ENSG00000131153 | GINS2    | 1.360160612  | 0.00012  |
| ENSG00000181938 | GINS3    | 1.588665969  | 7.23E-24 |
| ENSG00000123159 | GIPC1    | 1.364795403  | 6.03E-08 |
| ENSG00000179855 | GIPC3    | -1.387461872 | 0.002291 |
| ENSG00000152661 | GJA1     | 2.111809693  | 3.79E-12 |
| ENSG00000121743 | GJA3     | 1.883483307  | 0.002415 |
| ENSG00000165474 | GJB2     | 4.037542131  | 1.42E-29 |
| ENSG00000188910 | GJB3     | 1.701536576  | 6.34E-09 |
| ENSG00000189280 | GJB5     | 1.828440862  | 1.4E-08  |
| ENSG00000121742 | GJB6     | 2.71688625   | 2.71E-15 |
| ENSG00000198835 | GJC2     | -1.972142815 | 0.000574 |
| ENSG00000198814 | GK       | 1.258826506  | 0.000232 |
| ENSG00000165113 | GKAP1    | -1.629045697 | 4.7E-05  |
| ENSG00000166105 | GLB1L3   | 1.881359993  | 4E-06    |
| ENSG00000186417 | GLDN     | -1.459020344 | 1.27E-06 |
| ENSG00000111087 | GLI1     | -1.353905791 | 0.001111 |
| ENSG00000074047 | GLI2     | -1.49328234  | 3.08E-05 |
| ENSG00000180481 | GLIPR1L2 | -2.003428003 | 8.67E-09 |
| ENSG00000126603 | GLIS2    | -1.430480867 | 1.27E-07 |
| ENSG00000124767 | GLO1     | 1.297623005  | 1.23E-06 |
| ENSG00000065325 | GLP2R    | -2.809247734 | 0.031235 |
| ENSG00000109738 | GLRB     | -3.189732274 | 1.12E-14 |
| ENSG00000108010 | GLRX3    | 1.558255041  | 5.62E-08 |
| ENSG00000139433 | GLTP     | 2.608290982  | 2.05E-41 |
| ENSG00000182327 | GLTPD2   | 4.896620695  | 0.010797 |
| ENSG00000149124 | GLYAT    | -2.961152656 | 3.18E-09 |
| ENSG00000156689 | GLYATL2  | -1.27668429  | 0.007875 |
| ENSG00000196743 | GM2A     | 1.313988573  | 8.21E-08 |
| ENSG00000060558 | GNA15    | 2.741948834  | 2.25E-18 |
| ENSG00000065135 | GNAI3    | 1.411035776  | 9.29E-08 |
| ENSG00000128266 | GNAZ     | -2.041174426 | 2.67E-09 |
| ENSG00000159921 | GNE      | -1.261344104 | 7.73E-08 |
| ENSG00000127920 | GNG11    | -1.153230122 | 2.36E-05 |
| ENSG00000186469 | GNG2     | -1.7131869   | 7.13E-07 |
| ENSG00000168243 | GNG4     | 4.930480568  | 1.59E-10 |
| ENSG00000176533 | GNG7     | -2.482440338 | 1.4E-13  |

|                 |         |              |          |
|-----------------|---------|--------------|----------|
| ENSG00000167083 | GNGT2   | 2.096220126  | 0.003683 |
| ENSG00000124713 | GNMT    | -2.381059735 | 0.048787 |
| ENSG00000155265 | GOLGA7B | 1.440472432  | 1.56E-07 |
| ENSG00000232653 | GOLGA8N | -1.140308452 | 0.007284 |
| ENSG00000186399 | GOLGA8R | -1.870466696 | 0.034593 |
| ENSG00000135052 | GOLM1   | -1.048012858 | 0.000188 |
| ENSG00000119927 | GPAM    | -2.811867044 | 1.81E-07 |
| ENSG00000179921 | GPBAR1  | -1.683927766 | 0.048729 |
| ENSG00000213420 | GPC2    | -1.438284613 | 0.001594 |
| ENSG00000147257 | GPC3    | -3.279686841 | 1.75E-12 |
| ENSG00000076716 | GPC4    | -1.862401591 | 6.08E-09 |
| ENSG00000183098 | GPC6    | -2.421904562 | 9.95E-15 |
| ENSG00000167588 | GPD1    | -4.090528663 | 1.28E-09 |
| ENSG00000152642 | GPD1L   | -1.105514701 | 1.83E-08 |
| ENSG00000164850 | GPER1   | -1.637010207 | 7.79E-05 |
| ENSG00000277494 | GPIHBP1 | -2.948310393 | 6.69E-09 |
| ENSG00000150625 | GPM6A   | -2.696511089 | 0.00217  |
| ENSG00000183671 | GPR1    | 2.608399484  | 1.51E-11 |
| ENSG00000132975 | GPR12   | -3.546970813 | 6.34E-08 |
| ENSG00000164849 | GPR146  | -2.220697604 | 6.38E-21 |
| ENSG00000158292 | GPR153  | 1.048529963  | 6.47E-09 |
| ENSG00000180758 | GPR157  | 1.232348579  | 2.97E-07 |
| ENSG00000151025 | GPR158  | 2.460864302  | 0.011271 |
| ENSG00000173890 | GPR160  | -2.297377821 | 5.78E-12 |
| ENSG00000184194 | GPR173  | -1.277708619 | 0.009516 |
| ENSG00000277399 | GPR179  | -3.596273203 | 0.030831 |
| ENSG00000166856 | GPR182  | -2.724870355 | 0.008295 |
| ENSG00000181773 | GPR3    | 4.313154972  | 5.05E-05 |
| ENSG00000171659 | GPR34   | -2.307241964 | 3.66E-05 |
| ENSG00000178623 | GPR35   | -1.943343344 | 0.000966 |
| ENSG00000170075 | GPR37L1 | -3.109224313 | 0.010695 |
| ENSG00000140030 | GPR65   | 2.144511152  | 0.004149 |
| ENSG00000119714 | GPR68   | 1.904626163  | 2.03E-13 |
| ENSG00000155269 | GPR78   | 2.598758528  | 0.018725 |
| ENSG00000171657 | GPR82   | -1.45590079  | 0.035255 |
| ENSG00000138271 | GPR87   | 1.989941618  | 3.58E-13 |
| ENSG00000198932 | GPRASP1 | -2.485439346 | 2.77E-11 |
| ENSG00000158301 | GPRASP2 | -1.155800501 | 4.65E-08 |
| ENSG00000167191 | GPRC5B  | -1.940290603 | 6.48E-11 |
| ENSG00000170412 | GPRC5C  | -1.195121456 | 1.96E-05 |
| ENSG00000111291 | GPRC5D  | 3.908418082  | 0.020655 |
| ENSG00000169258 | GPRIN1  | 3.776953213  | 5.1E-16  |
| ENSG00000204175 | GPRIN2  | 1.91706438   | 0.000646 |
| ENSG00000167701 | GPT     | -1.0852467   | 0.003992 |
| ENSG00000176153 | GPX2    | 2.329317333  | 4.26E-12 |
| ENSG00000100351 | GRAP2   | -1.455076593 | 0.001227 |
| ENSG00000161835 | GRASP   | -1.122178274 | 0.001012 |
| ENSG00000115290 | GRB14   | -2.08772142  | 8.26E-08 |

|                 |           |              |          |
|-----------------|-----------|--------------|----------|
| ENSG00000141738 | GRB7      | 1.074603364  | 3.39E-05 |
| ENSG00000141449 | GREB1L    | -3.194866565 | 5.91E-12 |
| ENSG00000180875 | GREM2     | -2.912961333 | 5.03E-07 |
| ENSG00000134317 | GRHL1     | 1.364042479  | 2.53E-12 |
| ENSG00000158055 | GRHL3     | 3.221624471  | 4.26E-29 |
| ENSG00000155511 | GRIA1     | -1.632503584 | 0.026163 |
| ENSG00000120251 | GRIA2     | -2.734362368 | 7.6E-06  |
| ENSG00000152578 | GRIA4     | -2.924414653 | 1.58E-07 |
| ENSG00000182771 | GRID1     | -1.234517534 | 0.002369 |
| ENSG00000171189 | GRIK1     | -2.351320502 | 0.000412 |
| ENSG00000163873 | GRIK3     | -3.153352747 | 2.02E-08 |
| ENSG00000149403 | GRIK4     | -1.389584505 | 0.044288 |
| ENSG00000183454 | GRIN2A    | -1.365182065 | 0.00477  |
| ENSG00000273079 | GRIN2B    | -2.711220736 | 6.64E-05 |
| ENSG00000198785 | GRIN3A    | -4.515403445 | 1.6E-07  |
| ENSG00000116032 | GRIN3B    | 1.922724952  | 0.019849 |
| ENSG00000100077 | GRK3      | -1.205224677 | 1.08E-05 |
| ENSG00000124493 | GRM4      | 4.223277577  | 2.88E-05 |
| ENSG00000030582 | GRN       | 1.115611601  | 3.8E-05  |
| ENSG00000164284 | GRPEL2    | 1.114564416  | 0.000163 |
| ENSG00000186088 | GSAP      | -1.26338805  | 8.57E-08 |
| ENSG00000167914 | GSDMA     | 3.530353945  | 6.35E-22 |
| ENSG00000073605 | GSDMB     | -1.214484932 | 0.006424 |
| ENSG00000147697 | GSDMC     | 1.661235611  | 4.11E-16 |
| ENSG00000105928 | GSDME     | 2.114176372  | 4.39E-06 |
| ENSG00000100744 | GSKIP     | 1.264031392  | 0.000199 |
| ENSG00000148180 | GSN       | -1.456899205 | 1.42E-11 |
| ENSG00000189369 | GSPT2     | -1.159481669 | 1.24E-08 |
| ENSG00000243955 | GSTA1     | -2.705840027 | 0.000672 |
| ENSG00000170899 | GSTA4     | 1.551426485  | 6.63E-15 |
| ENSG00000213366 | GSTM2     | -1.899760509 | 5.69E-06 |
| ENSG00000134202 | GSTM3     | -1.14102517  | 0.000226 |
| ENSG00000134201 | GSTM5     | -3.43312507  | 1.16E-19 |
| ENSG00000148834 | GSTO1     | 1.223105958  | 1.26E-05 |
| ENSG00000084207 | GSTP1     | 2.089209186  | 4.15E-16 |
| ENSG00000196275 | GTF2IRD2  | -1.328076184 | 0.000117 |
| ENSG00000174428 | GTF2IRD2B | -1.497284179 | 1.39E-06 |
| ENSG00000155115 | GTF3C6    | 1.402922724  | 5.97E-10 |
| ENSG00000075218 | GTSE1     | 1.188047457  | 8.11E-05 |
| ENSG00000112599 | GUCA1B    | -1.892134738 | 6.48E-05 |
| ENSG00000164116 | GUCY1A1   | -1.229744988 | 0.003618 |
| ENSG00000061918 | GUCY1B1   | -1.05203242  | 0.001447 |
| ENSG00000179240 | GVQW3     | -2.140606304 | 5.15E-05 |
| ENSG00000172986 | GXYLT2    | -1.137727121 | 0.002594 |
| ENSG00000056998 | GYG2      | -2.833294431 | 1.26E-09 |
| ENSG00000136732 | GYPC      | -1.992933198 | 1.38E-12 |
| ENSG00000188486 | H2AFX     | 1.358316032  | 6.6E-05  |
| ENSG00000113648 | H2AFY     | 1.314512632  | 2.77E-15 |

|                 |           |              |          |
|-----------------|-----------|--------------|----------|
| ENSG00000099284 | H2AFY2    | 1.031286141  | 0.000296 |
| ENSG00000164032 | H2AFZ     | 1.357144772  | 4.96E-10 |
| ENSG00000162882 | HAAO      | -1.347351658 | 0.00022  |
| ENSG00000148702 | HABP2     | 5.966490804  | 7.28E-07 |
| ENSG00000130956 | HABP4     | -1.231649997 | 9.01E-10 |
| ENSG00000084110 | HAL       | 4.336510477  | 4.38E-51 |
| ENSG00000164107 | HAND2     | -2.158894212 | 0.008121 |
| ENSG00000116882 | HAO2      | -3.854884781 | 0.005257 |
| ENSG00000180423 | HARBI1    | 1.273394848  | 7.77E-08 |
| ENSG00000105509 | HAS1      | -1.809692551 | 0.00733  |
| ENSG00000103044 | HAS3      | 3.050807964  | 5.95E-17 |
| ENSG00000177602 | HASPIN    | 2.54337937   | 2.43E-06 |
| ENSG00000213397 | HAUS7     | -1.803402347 | 0.00025  |
| ENSG00000206172 | HBA1      | -2.172580374 | 0.008309 |
| ENSG00000188536 | HBA2      | -2.402448832 | 0.003515 |
| ENSG00000113070 | HBEGF     | 1.869290287  | 9.61E-06 |
| ENSG00000196917 | HCAR1     | -2.718559922 | 0.000134 |
| ENSG00000182782 | HCAR2     | 1.884600172  | 1.67E-05 |
| ENSG00000255398 | HCAR3     | 2.567912946  | 0.00033  |
| ENSG00000048052 | HDAC9     | -1.19457281  | 0.001185 |
| ENSG00000140287 | HDC       | -1.976679352 | 4.79E-05 |
| ENSG00000165259 | HDX       | -1.17450589  | 0.024435 |
| ENSG00000155393 | HEATR3    | 1.01525946   | 5.97E-09 |
| ENSG00000187105 | HEATR4    | -2.423522688 | 0.000212 |
| ENSG00000002746 | HECW1     | -1.563937593 | 0.008087 |
| ENSG00000130589 | HELZ2     | 1.150700269  | 1.02E-09 |
| ENSG00000136929 | HEMGN     | -3.834784947 | 0.002504 |
| ENSG00000165478 | HEPACAM   | -4.361737376 | 0.000233 |
| ENSG00000181333 | HEPHL1    | 6.183124372  | 6.89E-17 |
| ENSG00000138642 | HERC6     | 1.814943146  | 1.22E-07 |
| ENSG00000069812 | HES2      | 1.393876577  | 9.42E-13 |
| ENSG00000197921 | HES5      | 2.003494669  | 0.000515 |
| ENSG00000162669 | HFM1      | -3.544690692 | 0.002542 |
| ENSG00000113924 | HGD       | -2.559984084 | 0.007465 |
| ENSG00000019991 | HGF       | -1.094679387 | 0.029856 |
| ENSG00000010282 | HHATL     | -4.905682908 | 6.31E-05 |
| ENSG00000152804 | HHEX      | -1.110187034 | 0.000113 |
| ENSG00000164161 | HHIP      | -2.118023428 | 0.015814 |
| ENSG00000182218 | HHIPL1    | -1.404117098 | 0.004515 |
| ENSG00000106049 | HIBADH    | -1.405980095 | 1.22E-17 |
| ENSG00000177374 | HIC1      | -1.825722695 | 5.84E-07 |
| ENSG00000167861 | HID1      | -2.014189909 | 3.31E-12 |
| ENSG00000124440 | HIF3A     | -3.475424592 | 3.65E-13 |
| ENSG00000181061 | HIGD1A    | 1.54885498   | 6.5E-08  |
| ENSG00000184357 | HIST1H1B  | 2.268888101  | 0.014064 |
| ENSG00000124575 | HIST1H1D  | 1.381731699  | 0.041565 |
| ENSG00000180573 | HIST1H2AC | 1.784709323  | 2.75E-05 |
| ENSG00000196787 | HIST1H2AG | 2.051138435  | 0.007015 |

|                 |           |              |          |
|-----------------|-----------|--------------|----------|
| ENSG00000196747 | HIST1H2AI | 2.365980421  | 0.020654 |
| ENSG00000276410 | HIST1H2BB | 3.458278277  | 0.00853  |
| ENSG00000180596 | HIST1H2BC | 1.194263525  | 0.047864 |
| ENSG00000158373 | HIST1H2BD | 1.461620948  | 1.23E-06 |
| ENSG00000274290 | HIST1H2BE | 1.689269541  | 0.042147 |
| ENSG00000277224 | HIST1H2BF | 4.416352577  | 4.2E-06  |
| ENSG00000273802 | HIST1H2BG | 1.44133187   | 0.000331 |
| ENSG00000275713 | HIST1H2BH | 2.853787544  | 9.83E-07 |
| ENSG00000278588 | HIST1H2BI | 3.042144383  | 0.00358  |
| ENSG00000124635 | HIST1H2BJ | 3.190553588  | 2.33E-06 |
| ENSG00000185130 | HIST1H2BL | 3.857533351  | 0.001015 |
| ENSG00000275714 | HIST1H3A  | 3.179579898  | 0.016864 |
| ENSG00000274267 | HIST1H3B  | 2.811095108  | 0.003719 |
| ENSG00000274750 | HIST1H3E  | 1.936917197  | 0.00182  |
| ENSG00000277775 | HIST1H3F  | 2.652931438  | 0.043898 |
| ENSG00000273983 | HIST1H3G  | 4.053920415  | 0.000684 |
| ENSG00000278828 | HIST1H3H  | 2.273801085  | 0.001626 |
| ENSG00000197061 | HIST1H4C  | 1.703708444  | 0.00737  |
| ENSG00000197238 | HIST1H4J  | 3.566155833  | 0.019343 |
| ENSG00000184260 | HIST2H2AC | 2.059175963  | 0.014521 |
| ENSG00000203814 | HIST2H2BF | 1.650469053  | 0.013657 |
| ENSG00000196890 | HIST3H2BB | 3.418615209  | 0.000102 |
| ENSG00000197837 | HIST4H4   | 1.674494922  | 0.02321  |
| ENSG00000127124 | HIVEP3    | -1.031609018 | 0.000504 |
| ENSG00000123485 | HJURP     | 1.396633978  | 0.000116 |
| ENSG00000159399 | HK2       | 1.687716878  | 3.27E-05 |
| ENSG00000204257 | HLA-DMA   | -1.227582143 | 3.42E-07 |
| ENSG00000204252 | HLA-DOA   | -1.186279593 | 9.82E-05 |
| ENSG00000179344 | HLA-DQB1  | -1.105933378 | 0.0098   |
| ENSG00000108924 | HLF       | -1.161248968 | 0.000553 |
| ENSG00000256269 | HMBS      | 1.051273221  | 1.06E-05 |
| ENSG00000148357 | HMCN2     | -3.037355021 | 1.49E-11 |
| ENSG00000137309 | HMGA1     | 1.317080914  | 1.82E-05 |
| ENSG00000149948 | HMGA2     | 7.545451048  | 9.89E-34 |
| ENSG00000029993 | HMGB3     | 1.390165396  | 6.22E-09 |
| ENSG00000146151 | HMGCLL1   | -2.308874779 | 0.02857  |
| ENSG00000113161 | HMGCR     | 1.252849307  | 0.001052 |
| ENSG00000134240 | HMGCS2    | -4.30597709  | 5.29E-11 |
| ENSG00000072571 | HMMR      | 1.028205693  | 0.001815 |
| ENSG00000100292 | HMOX1     | 2.565059863  | 3.58E-10 |
| ENSG00000103415 | HMOX2     | 1.428476817  | 2.78E-05 |
| ENSG00000221887 | HMSD      | 3.109808865  | 0.000105 |
| ENSG00000150540 | HNMT      | -1.524284689 | 8.12E-11 |
| ENSG00000197451 | HNRNPAB   | 1.165186569  | 3.79E-10 |
| ENSG00000241935 | HOGA1     | -1.185022526 | 0.008424 |
| ENSG00000152413 | HOMER1    | 1.703385758  | 3.76E-12 |
| ENSG00000051128 | HOMER3    | 1.428644426  | 1.49E-08 |
| ENSG00000134709 | HOOK1     | 1.760776489  | 3.62E-15 |

|                 |          |              |          |
|-----------------|----------|--------------|----------|
| ENSG00000171476 | HOPX     | 1.634615201  | 2.89E-10 |
| ENSG00000253293 | HOXA10   | -2.252743659 | 2.42E-17 |
| ENSG00000005073 | HOXA11   | -2.219909541 | 2.3E-05  |
| ENSG00000106031 | HOXA13   | -2.905681241 | 9.47E-06 |
| ENSG00000105997 | HOXA3    | -1.078435524 | 0.000573 |
| ENSG00000120093 | HOXB3    | -1.441457848 | 2.99E-05 |
| ENSG00000182742 | HOXB4    | -1.049432477 | 0.008849 |
| ENSG00000120075 | HOXB5    | -1.641653057 | 0.001496 |
| ENSG00000108511 | HOXB6    | -1.23898491  | 0.035567 |
| ENSG00000120068 | HOXB8    | -1.941539224 | 0.004094 |
| ENSG00000123407 | HOXC12   | -1.52622314  | 0.001054 |
| ENSG00000037965 | HOXC8    | -1.073638992 | 0.000535 |
| ENSG00000128645 | HOXD1    | -1.509567044 | 0.042142 |
| ENSG00000128652 | HOXD3    | -2.37721301  | 0.001508 |
| ENSG00000158104 | HPD      | -3.500270013 | 8.64E-05 |
| ENSG00000186603 | HPDL     | 1.636993176  | 0.000684 |
| ENSG00000164120 | HPGD     | 1.776409652  | 7.5E-08  |
| ENSG00000163106 | HPGDS    | -1.793473848 | 5.14E-08 |
| ENSG00000173083 | HPSE     | 3.809519535  | 2.52E-19 |
| ENSG00000172987 | HPSE2    | -3.456072092 | 2.75E-14 |
| ENSG00000127252 | HRASLS   | 1.104501456  | 0.00738  |
| ENSG00000133328 | HRASLS2  | 3.27325264   | 0.013172 |
| ENSG00000168004 | HRASLS5  | -4.322578571 | 3.93E-08 |
| ENSG00000130528 | HRC      | -2.401715085 | 3.23E-09 |
| ENSG00000196196 | HRCT1    | -3.296522614 | 3.37E-09 |
| ENSG00000101180 | HRH3     | 6.154364062  | 6.09E-12 |
| ENSG00000197915 | HRNR     | 13.64314413  | 1.6E-166 |
| ENSG00000153976 | HS3ST3A1 | 3.493880053  | 1.14E-09 |
| ENSG00000182601 | HS3ST4   | -2.459795014 | 1.47E-05 |
| ENSG00000162040 | HS3ST6   | 1.283180221  | 0.001132 |
| ENSG00000185352 | HS6ST3   | -2.735016763 | 0.001466 |
| ENSG00000117594 | HSD11B1  | -2.471907749 | 3.59E-08 |
| ENSG00000176387 | HSD11B2  | -1.650702144 | 2.27E-05 |
| ENSG00000108786 | HSD17B1  | 2.379425654  | 1.33E-06 |
| ENSG00000072506 | HSD17B10 | 1.012904648  | 8.36E-06 |
| ENSG00000198189 | HSD17B11 | -1.000105637 | 2.29E-05 |
| ENSG00000170509 | HSD17B13 | -4.574607544 | 1.91E-09 |
| ENSG00000087076 | HSD17B14 | -1.043710551 | 0.026834 |
| ENSG00000025423 | HSD17B6  | -1.14676948  | 0.011854 |
| ENSG00000102878 | HSF4     | -1.239727153 | 0.005672 |
| ENSG00000165868 | HSPA12A  | -1.096730818 | 6.58E-05 |
| ENSG00000132622 | HSPA12B  | -1.768870113 | 1.16E-07 |
| ENSG00000164070 | HSPA4L   | 1.348405312  | 6.93E-13 |
| ENSG00000173110 | HSPA6    | 3.106227056  | 1.29E-10 |
| ENSG00000109971 | HSPA8    | 1.07842888   | 0.002599 |
| ENSG00000106211 | HSPB1    | 1.174213013  | 9.13E-06 |
| ENSG00000004776 | HSPB6    | -3.701612384 | 9.84E-17 |
| ENSG00000173641 | HSPB7    | -3.813886327 | 9.16E-18 |

|                 |         |              |          |
|-----------------|---------|--------------|----------|
| ENSG00000142798 | HSPG2   | -1.155892876 | 0.000442 |
| ENSG00000120694 | HSPH1   | 1.405633515  | 1.9E-07  |
| ENSG00000109854 | HTATIP2 | 1.819122477  | 7.47E-11 |
| ENSG00000166736 | HTR3A   | 4.95143826   | 3.73E-09 |
| ENSG00000148680 | HTR7    | 3.473170233  | 1.37E-18 |
| ENSG00000122986 | HVCN1   | -1.42803728  | 0.00121  |
| ENSG00000186792 | HYAL3   | 2.523604658  | 1.86E-05 |
| ENSG00000178922 | HYI     | -1.566092875 | 1.89E-08 |
| ENSG00000188266 | HYKK    | -1.013759661 | 0.004666 |
| ENSG00000242028 | HYPK    | -1.859537122 | 2.84E-05 |
| ENSG00000003147 | ICA1    | -1.827833972 | 4.56E-14 |
| ENSG00000163596 | ICA1L   | -1.467521252 | 1.55E-05 |
| ENSG00000105376 | ICAM5   | 2.252040566  | 0.015123 |
| ENSG00000172201 | ID4     | -1.690700297 | 7.75E-11 |
| ENSG00000119912 | IDE     | 2.541790361  | 1.25E-20 |
| ENSG00000127415 | IDUA    | -1.655982794 | 2.15E-06 |
| ENSG00000160888 | IER2    | 1.417985052  | 6.35E-09 |
| ENSG00000137331 | IER3    | 1.14087831   | 0.000101 |
| ENSG00000162783 | IER5    | 1.443827538  | 8.16E-09 |
| ENSG00000010295 | IFFO1   | -1.231899465 | 1.38E-05 |
| ENSG00000169991 | IFFO2   | 1.219479851  | 5.54E-06 |
| ENSG00000165949 | IFI27   | 3.317751592  | 8.97E-21 |
| ENSG00000119632 | IFI27L2 | 1.118128879  | 2.35E-06 |
| ENSG00000137965 | IFI44   | 1.657660273  | 0.000365 |
| ENSG00000126709 | IFI6    | 2.511526026  | 5.91E-09 |
| ENSG00000185745 | IFIT1   | 1.058019424  | 0.007425 |
| ENSG00000185885 | IFITM1  | 1.133661461  | 3.8E-05  |
| ENSG00000142089 | IFITM3  | 1.152550816  | 9.7E-08  |
| ENSG00000184995 | IFNE    | 7.430915268  | 2.58E-19 |
| ENSG00000147896 | IFNK    | 4.593418016  | 0.00302  |
| ENSG00000214706 | IFRD2   | 1.081074499  | 0.000126 |
| ENSG00000138002 | IFT172  | -1.022218698 | 2.24E-05 |
| ENSG00000103742 | IGDCC4  | -1.472638109 | 0.007175 |
| ENSG00000017427 | IGF1    | -1.665068385 | 7.25E-06 |
| ENSG00000167244 | IGF2    | -2.355676732 | 7.67E-07 |
| ENSG00000136231 | IGF2BP3 | 2.097922464  | 0.009386 |
| ENSG00000115461 | IGFBP5  | -1.843311856 | 2.28E-08 |
| ENSG00000188293 | IGFL1   | 11.70799674  | 1.83E-26 |
| ENSG00000204866 | IGFL2   | 3.169352719  | 3.27E-15 |
| ENSG00000188624 | IGFL3   | 2.442295629  | 7.73E-15 |
| ENSG00000147255 | IGSF1   | -4.045090355 | 1.12E-08 |
| ENSG00000152580 | IGSF10  | -3.006811027 | 1.09E-12 |
| ENSG00000144847 | IGSF11  | -1.125451357 | 0.029233 |
| ENSG00000117154 | IGSF21  | -2.31047003  | 0.001967 |
| ENSG00000143061 | IGSF3   | 1.384834766  | 9.48E-12 |
| ENSG00000080854 | IGSF9B  | 1.338373621  | 0.044354 |
| ENSG00000263528 | IKBKE   | 1.099847583  | 1.39E-08 |
| ENSG00000137070 | IL11RA  | -1.808725197 | 1.38E-06 |



|                 |          |              |          |
|-----------------|----------|--------------|----------|
| ENSG00000168811 | IL12A    | -3.967856944 | 0.000323 |
| ENSG00000081985 | IL12RB2  | 2.262637481  | 4.66E-13 |
| ENSG00000172349 | IL16     | -1.131935129 | 2.24E-05 |
| ENSG00000172458 | IL17D    | -2.425932604 | 1.19E-05 |
| ENSG00000056736 | IL17RB   | -1.219295985 | 0.018337 |
| ENSG00000150782 | IL18     | 1.0956849    | 1.67E-07 |
| ENSG00000115607 | IL18RAP  | 1.448665564  | 0.037989 |
| ENSG00000115008 | IL1A     | 6.483062292  | 2.37E-10 |
| ENSG00000125538 | IL1B     | 4.048802473  | 5.29E-05 |
| ENSG00000136697 | IL1F10   | 5.05426328   | 2.96E-08 |
| ENSG00000115590 | IL1R2    | 1.037413115  | 0.007952 |
| ENSG00000169306 | IL1RAPL1 | -3.279611015 | 0.000733 |
| ENSG00000115602 | IL1RL1   | 2.744271556  | 6.11E-05 |
| ENSG00000136689 | IL1RN    | 2.149480538  | 1.98E-08 |
| ENSG00000162891 | IL20     | 4.416186276  | 3.3E-05  |
| ENSG00000142677 | IL22RA1  | 1.943778166  | 6.7E-13  |
| ENSG00000164485 | IL22RA2  | 2.664337149  | 0.004472 |
| ENSG00000157368 | IL34     | -1.285773275 | 5.27E-06 |
| ENSG00000136696 | IL36B    | 5.176124478  | 1.33E-18 |
| ENSG00000136688 | IL36G    | 5.805985822  | 7.83E-20 |
| ENSG00000136695 | IL36RN   | 5.22166463   | 1.95E-34 |
| ENSG00000125571 | IL37     | 1.521931509  | 0.001864 |
| ENSG00000104951 | IL4I1    | 1.864968642  | 0.010104 |
| ENSG00000077238 | IL4R     | 1.656133381  | 2.61E-14 |
| ENSG00000134352 | IL6ST    | -1.010795501 | 8.33E-06 |
| ENSG00000145103 | ILDR1    | -1.527231416 | 9.17E-07 |
| ENSG00000184903 | IMMP2L   | -1.057809266 | 2.97E-05 |
| ENSG00000141401 | IMPA2    | 1.289572507  | 1.03E-09 |
| ENSG00000106348 | IMPDH1   | 1.409033537  | 7.12E-08 |
| ENSG00000148798 | INA      | 6.780060848  | 2.12E-31 |
| ENSG00000163362 | INAVA    | 1.072549257  | 5.84E-07 |
| ENSG00000149503 | INCENP   | 1.099069261  | 7.37E-07 |
| ENSG00000163083 | INHBB    | -2.203744683 | 2.39E-09 |
| ENSG00000185614 | INKA1    | 1.12825671   | 4.22E-07 |
| ENSG00000241644 | INMT     | -2.260092977 | 1.09E-11 |
| ENSG00000186480 | INSIG1   | -1.248861475 | 8.05E-05 |
| ENSG00000173404 | INSM1    | -2.95197577  | 0.040831 |
| ENSG00000127080 | IPPK     | 1.592174473  | 2.15E-12 |
| ENSG00000203499 | IQANK1   | 1.162601467  | 2.51E-06 |
| ENSG00000130518 | IQCN     | -2.626693224 | 1.53E-13 |
| ENSG00000145703 | IQGAP2   | -2.105607262 | 9.54E-10 |
| ENSG00000183856 | IQGAP3   | 1.065527129  | 0.002352 |
| ENSG00000120645 | IQSEC3   | -3.570088502 | 2.09E-06 |
| ENSG00000184216 | IRAK1    | 1.11232485   | 4.12E-06 |
| ENSG00000134070 | IRAK2    | 1.394799254  | 0.000763 |
| ENSG00000090376 | IRAK3    | -1.06559302  | 0.000215 |
| ENSG00000185507 | IRF7     | 2.068453671  | 1.67E-18 |
| ENSG00000170549 | IRX1     | -1.277999852 | 2.08E-08 |



|                 |         |              |          |
|-----------------|---------|--------------|----------|
| ENSG00000159387 | IRX6    | -2.322001996 | 2.84E-09 |
| ENSG00000187608 | ISG15   | 1.936277735  | 5.86E-06 |
| ENSG00000172183 | ISG20   | 1.534509363  | 5.45E-05 |
| ENSG00000129009 | ISLR    | -1.867078718 | 1.25E-06 |
| ENSG00000167178 | ISLR2   | -2.368251073 | 8.9E-06  |
| ENSG00000101230 | ISM1    | -2.064093429 | 4.63E-14 |
| ENSG00000105655 | ISYNA1  | -1.74588268  | 6.84E-08 |
| ENSG00000213949 | ITGA1   | -1.273336299 | 0.000179 |
| ENSG00000137809 | ITGA11  | -2.086530471 | 2.54E-06 |
| ENSG00000091409 | ITGA6   | 1.008146414  | 5.15E-07 |
| ENSG00000135424 | ITGA7   | -2.26935382  | 2.51E-09 |
| ENSG00000077943 | ITGA8   | -1.681918603 | 5.2E-05  |
| ENSG00000144668 | ITGA9   | -1.215028082 | 0.000952 |
| ENSG00000160255 | ITGB2   | -1.056984506 | 0.00076  |
| ENSG00000259207 | ITGB3   | -1.506646237 | 0.000603 |
| ENSG00000115221 | ITGB6   | 1.498422926  | 3.79E-05 |
| ENSG00000198542 | ITGBL1  | -1.975353983 | 1.17E-06 |
| ENSG00000162267 | ITIH3   | -1.608631605 | 0.014482 |
| ENSG00000123243 | ITIH5   | -2.452596145 | 3.08E-09 |
| ENSG00000078596 | ITM2A   | -1.872843459 | 1.43E-12 |
| ENSG00000125877 | ITPA    | 1.042034654  | 2.97E-09 |
| ENSG00000150995 | ITPR1   | -1.800473354 | 4.57E-16 |
| ENSG00000148841 | ITPRIP  | 1.389098066  | 3.07E-09 |
| ENSG00000205726 | ITSN1   | -1.429005032 | 9.87E-11 |
| ENSG00000128928 | IVD     | -1.188532705 | 3.25E-09 |
| ENSG00000163207 | IVL     | 5.174198603  | 3.18E-23 |
| ENSG00000009765 | IYD     | -2.689801217 | 2.36E-05 |
| ENSG00000182264 | IZUMO1  | 2.366668859  | 0.001116 |
| ENSG00000077684 | JADE1   | -1.579595441 | 1.1E-14  |
| ENSG00000043143 | JADE2   | -1.160392913 | 1.27E-06 |
| ENSG00000188385 | JAKMIP3 | -2.441292453 | 4.84E-06 |
| ENSG00000154721 | JAM2    | -1.50704877  | 2.48E-07 |
| ENSG00000165757 | JCAD    | -1.533667419 | 2.18E-05 |
| ENSG00000152409 | JMY     | 1.476091211  | 1.74E-18 |
| ENSG00000161677 | JOSD2   | 1.023657976  | 0.001919 |
| ENSG00000149596 | JPH2    | -2.610670502 | 1.46E-13 |
| ENSG00000189159 | JPT1    | 2.170517967  | 1.69E-12 |
| ENSG00000171223 | JUNB    | 1.780117127  | 6.27E-09 |
| ENSG00000173801 | JUP     | 2.191055896  | 1.66E-14 |
| ENSG00000197256 | KANK2   | -1.870553915 | 3.03E-14 |
| ENSG00000186994 | KANK3   | -1.51294361  | 1.25E-06 |
| ENSG00000132854 | KANK4   | -2.53563957  | 6.75E-07 |
| ENSG00000144445 | KANSL1L | -1.029879297 | 0.000274 |
| ENSG00000232593 | KANTR   | -1.074244271 | 0.003117 |
| ENSG00000167216 | KATNAL2 | -1.195311533 | 0.000621 |
| ENSG00000107821 | KAZALD1 | 1.057907916  | 0.047794 |
| ENSG00000187715 | KBTBD12 | -2.075755832 | 0.002893 |
| ENSG00000163376 | KBTBD8  | 2.769426515  | 4.42E-06 |

|                 |           |              |          |
|-----------------|-----------|--------------|----------|
| ENSG00000111262 | KCNA1     | -3.012123952 | 0.026085 |
| ENSG00000177301 | KCNA2     | -2.612754381 | 6.39E-06 |
| ENSG00000182255 | KCNA4     | -3.493875469 | 0.011818 |
| ENSG00000104848 | KCNA7     | 3.828498914  | 1.63E-05 |
| ENSG00000169282 | KCNAB1    | -3.233784146 | 3.38E-17 |
| ENSG00000158445 | KCNB1     | -4.143468105 | 6.69E-17 |
| ENSG00000166006 | KCNC2     | -4.56319168  | 0.001938 |
| ENSG00000184408 | KCND2     | -2.402373782 | 0.008597 |
| ENSG00000175538 | KCNE3     | -1.933739511 | 2.01E-06 |
| ENSG00000171126 | KCNG3     | 3.372622348  | 0.000537 |
| ENSG00000143473 | KCNH1     | 4.374700792  | 1.25E-05 |
| ENSG00000120049 | KCNIP2    | -3.181341248 | 8.75E-11 |
| ENSG00000151704 | KCNJ1     | -2.094868253 | 0.00414  |
| ENSG00000182324 | KCNJ14    | -1.083570156 | 0.002472 |
| ENSG00000157551 | KCNJ15    | 2.749684889  | 1.76E-14 |
| ENSG00000260458 | KCNJ18    | 2.291690664  | 2.91E-06 |
| ENSG00000162989 | KCNJ3     | -4.385046336 | 6.06E-07 |
| ENSG00000120457 | KCNJ5     | -1.349976221 | 0.008027 |
| ENSG00000121361 | KCNJ8     | -1.289648124 | 0.001482 |
| ENSG00000135750 | KCNK1     | 2.235652822  | 1.53E-18 |
| ENSG00000100433 | KCNK10    | 4.712852719  | 1.74E-17 |
| ENSG00000184261 | KCNK12    | 3.156469756  | 0.022518 |
| ENSG00000124249 | KCNK15    | -1.694862436 | 0.002428 |
| ENSG00000164626 | KCNK5     | -2.236137182 | 6.57E-10 |
| ENSG00000099337 | KCNK6     | 1.561232236  | 4.88E-19 |
| ENSG00000173338 | KCNK7     | 1.843683369  | 1.22E-10 |
| ENSG00000145936 | KCNMB1    | -2.404454479 | 2.93E-09 |
| ENSG00000104783 | KCNN4     | -2.147017207 | 2.02E-06 |
| ENSG00000117013 | KCNQ4     | -1.061391151 | 0.024544 |
| ENSG00000162687 | KCNT2     | -2.218621242 | 0.000112 |
| ENSG00000213859 | KCTD11    | 2.149072352  | 1.97E-12 |
| ENSG00000178695 | KCTD12    | -1.535289984 | 1.08E-06 |
| ENSG00000151364 | KCTD14    | -1.153195722 | 0.000726 |
| ENSG00000183775 | KCTD16    | -3.401744226 | 0.003642 |
| ENSG00000180332 | KCTD4     | 2.150819328  | 4.34E-06 |
| ENSG00000167977 | KCTD5     | 1.173556426  | 4.3E-07  |
| ENSG00000128052 | KDR       | -1.01012917  | 0.001614 |
| ENSG00000131773 | KHDRBS3   | -1.319936034 | 2.87E-08 |
| ENSG00000135709 | KIAA0513  | 1.639415383  | 2.2E-09  |
| ENSG00000114656 | KIAA1257  | 1.651269722  | 0.001116 |
| ENSG00000116299 | KIAA1324  | -2.828477432 | 6.06E-12 |
| ENSG00000164659 | KIAA1324L | -1.566767503 | 1.47E-09 |
| ENSG00000122778 | KIAA1549  | -1.716537997 | 8.13E-08 |
| ENSG00000135835 | KIAA1614  | -1.16126806  | 0.000666 |
| ENSG00000149633 | KIAA1755  | -2.199043517 | 0.000506 |
| ENSG00000138160 | KIF11     | 1.231842473  | 2.73E-07 |
| ENSG00000136883 | KIF12     | -1.387412324 | 0.002428 |
| ENSG00000118193 | KIF14     | 1.311058291  | 5.68E-05 |

|                 |         |              |          |
|-----------------|---------|--------------|----------|
| ENSG00000121621 | KIF18A  | 1.566306883  | 1.78E-06 |
| ENSG00000186185 | KIF18B  | 1.14255233   | 0.00026  |
| ENSG00000112984 | KIF20A  | 2.205498055  | 2.14E-05 |
| ENSG00000137807 | KIF23   | 1.472987471  | 2.61E-06 |
| ENSG00000066735 | KIF26A  | -1.399362276 | 0.00061  |
| ENSG00000165115 | KIF27   | -1.317523885 | 1.42E-05 |
| ENSG00000142945 | KIF2C   | 1.80916325   | 3.38E-09 |
| ENSG00000090889 | KIF4A   | 1.657138919  | 1.2E-06  |
| ENSG00000164627 | KIF6    | -3.098225891 | 1.55E-07 |
| ENSG00000237649 | KIFC1   | 1.063044457  | 0.004892 |
| ENSG00000157404 | KIT     | -1.943489312 | 3.85E-09 |
| ENSG00000133116 | KL      | -1.610781701 | 5.82E-06 |
| ENSG00000134962 | KLB     | -2.445283557 | 3.76E-08 |
| ENSG00000266265 | KLF14   | -2.821662735 | 0.003217 |
| ENSG00000163884 | KLF15   | -3.829064772 | 4.59E-18 |
| ENSG00000129911 | KLF16   | 1.077616193  | 2.49E-08 |
| ENSG00000127528 | KLF2    | -1.297956566 | 0.000309 |
| ENSG00000119138 | KLF9    | -1.576667322 | 3.45E-06 |
| ENSG00000197776 | KLHDC1  | -1.228614098 | 9.09E-05 |
| ENSG00000179023 | KLHDC7A | -1.753185591 | 0.03357  |
| ENSG00000130487 | KLHDC7B | 2.137573058  | 0.002938 |
| ENSG00000162755 | KLHDC9  | -1.819572731 | 5.32E-06 |
| ENSG00000003096 | KLHL13  | -1.128869445 | 5.84E-05 |
| ENSG00000114648 | KLHL18  | 1.259215292  | 2.66E-14 |
| ENSG00000114796 | KLHL24  | -1.052619432 | 0.000841 |
| ENSG00000168427 | KLHL30  | -2.338402964 | 2.91E-09 |
| ENSG00000124743 | KLHL31  | -2.008753278 | 2.39E-06 |
| ENSG00000185271 | KLHL33  | -3.338931267 | 0.000927 |
| ENSG00000129451 | KLK10   | 2.370269585  | 3.46E-12 |
| ENSG00000167757 | KLK11   | 1.279021375  | 1.59E-10 |
| ENSG00000186474 | KLK12   | 5.375170539  | 5.09E-08 |
| ENSG00000167759 | KLK13   | 2.91430593   | 1.71E-15 |
| ENSG00000167754 | KLK5    | 3.06758051   | 2.01E-16 |
| ENSG00000167755 | KLK6    | 4.604593291  | 2.99E-12 |
| ENSG00000169035 | KLK7    | 4.035778945  | 5.4E-39  |
| ENSG00000129455 | KLK8    | 3.470057017  | 2.06E-28 |
| ENSG00000164344 | KLKB1   | -1.977495013 | 0.034561 |
| ENSG00000137812 | KNL1    | 1.222493658  | 2.89E-05 |
| ENSG00000182481 | KPNA2   | 2.101359398  | 2.44E-13 |
| ENSG00000203786 | KPRP    | 3.372043959  | 1.69E-14 |
| ENSG00000133619 | KRBA1   | 1.228958173  | 6.19E-07 |
| ENSG00000167768 | KRT1    | 2.694844439  | 0.000524 |
| ENSG00000186395 | KRT10   | 2.351332577  | 0.002978 |
| ENSG00000171401 | KRT13   | 2.811792803  | 0.001017 |
| ENSG00000186847 | KRT14   | 2.366096659  | 0.000897 |
| ENSG00000171346 | KRT15   | -2.41311771  | 9.33E-11 |
| ENSG00000186832 | KRT16   | 7.176907819  | 3.11E-14 |
| ENSG00000128422 | KRT17   | 4.047403531  | 2.17E-10 |

|                 |           |              |          |
|-----------------|-----------|--------------|----------|
| ENSG00000111057 | KRT18     | -1.804279262 | 2.86E-06 |
| ENSG00000171345 | KRT19     | -3.084160211 | 1.1E-06  |
| ENSG00000172867 | KRT2      | 2.517010186  | 0.001544 |
| ENSG00000167916 | KRT24     | 5.156321966  | 1.03E-11 |
| ENSG00000204897 | KRT25     | 4.255482417  | 0.000944 |
| ENSG00000186442 | KRT3      | 11.33765271  | 1.24E-40 |
| ENSG00000131738 | KRT33B    | 4.773120094  | 0.008794 |
| ENSG00000131737 | KRT34     | 5.64031597   | 1.18E-09 |
| ENSG00000197079 | KRT35     | 5.141550961  | 0.023588 |
| ENSG00000108417 | KRT37     | 6.620276673  | 1.83E-26 |
| ENSG00000196859 | KRT39     | 5.560262429  | 0.010105 |
| ENSG00000186081 | KRT5      | 2.039714068  | 5.15E-18 |
| ENSG00000205420 | KRT6A     | 6.068639322  | 1.45E-32 |
| ENSG00000185479 | KRT6B     | 5.417709338  | 4.8E-23  |
| ENSG00000170465 | KRT6C     | 12.02541116  | 8.13E-35 |
| ENSG00000135480 | KRT7      | -2.760429602 | 9.95E-07 |
| ENSG00000170454 | KRT75     | 2.25758913   | 0.032086 |
| ENSG00000189182 | KRT77     | -2.423138824 | 2.34E-10 |
| ENSG00000170423 | KRT78     | 3.673191719  | 3.05E-29 |
| ENSG00000170421 | KRT8      | -2.698691273 | 1.64E-09 |
| ENSG00000167767 | KRT80     | 2.640677532  | 1.6E-13  |
| ENSG00000161850 | KRT82     | 3.502254354  | 0.02597  |
| ENSG00000161849 | KRT84     | 4.579193206  | 1.27E-05 |
| ENSG00000171403 | KRT9      | 4.381291692  | 7.4E-31  |
| ENSG00000188581 | KRTAP1-1  | 12.40509758  | 0.00022  |
| ENSG00000212657 | KRTAP16-1 | 11.12314086  | 0.001061 |
| ENSG00000212900 | KRTAP3-2  | 8.133242269  | 0.000879 |
| ENSG00000188508 | KRTDAP    | 3.731822829  | 6.61E-26 |
| ENSG00000171435 | KSR2      | -2.105033257 | 0.001257 |
| ENSG00000174611 | KY        | -2.344420558 | 1.45E-06 |
| ENSG00000115919 | KYNU      | 1.72142778   | 7.51E-05 |
| ENSG00000159166 | LAD1      | 2.925473391  | 2.45E-21 |
| ENSG00000167613 | LAIR1     | -2.141603942 | 2.54E-07 |
| ENSG00000101680 | LAMA1     | -1.011566813 | 0.018717 |
| ENSG00000196569 | LAMA2     | -1.648128073 | 1.62E-05 |
| ENSG00000112769 | LAMA4     | -1.678429347 | 5.2E-08  |
| ENSG00000172037 | LAMB2     | -1.006322789 | 0.00021  |
| ENSG00000091128 | LAMB4     | -1.095536114 | 0.0098   |
| ENSG00000050555 | LAMC3     | -2.098479308 | 2.41E-06 |
| ENSG00000078081 | LAMP3     | 1.773692682  | 1.25E-05 |
| ENSG00000125869 | LAMP5     | 1.076550546  | 0.048726 |
| ENSG00000147036 | LANCL3    | 1.351162417  | 0.002305 |
| ENSG00000166173 | LARP6     | -1.676977051 | 1.63E-07 |
| ENSG00000086730 | LAT2      | 1.276998312  | 0.000255 |
| ENSG00000122188 | LAX1      | -1.405211639 | 0.000761 |
| ENSG00000179528 | LBX2      | 3.663991245  | 8.07E-05 |
| ENSG00000135338 | LCA5      | -1.687805533 | 1.15E-06 |
| ENSG00000186844 | LCE1A     | 2.681294485  | 8.38E-06 |

|                 |          |              |          |
|-----------------|----------|--------------|----------|
| ENSG00000196734 | LCE1B    | 2.76917869   | 3.42E-07 |
| ENSG00000197084 | LCE1C    | 2.957010478  | 4.61E-07 |
| ENSG00000172155 | LCE1D    | 1.957073255  | 7.34E-06 |
| ENSG00000186226 | LCE1E    | 3.099854688  | 1.15E-06 |
| ENSG00000240386 | LCE1F    | 3.692604478  | 7.45E-10 |
| ENSG00000187173 | LCE2A    | 3.15718796   | 1.76E-11 |
| ENSG00000159455 | LCE2B    | 2.388815572  | 2.9E-05  |
| ENSG00000187180 | LCE2C    | 3.051570581  | 1.09E-06 |
| ENSG00000187223 | LCE2D    | 3.500420561  | 2.21E-07 |
| ENSG00000185962 | LCE3A    | 11.92778857  | 1.02E-19 |
| ENSG00000244057 | LCE3C    | 9.293489245  | 1.87E-10 |
| ENSG00000163202 | LCE3D    | 9.188368041  | 2.51E-32 |
| ENSG00000185966 | LCE3E    | 10.30230559  | 7.34E-28 |
| ENSG00000187170 | LCE4A    | 3.65020685   | 2.45E-06 |
| ENSG00000235942 | LCE6A    | 3.49925002   | 1.14E-08 |
| ENSG00000205629 | LCMT1    | 1.166398032  | 3.25E-06 |
| ENSG00000148346 | LCN2     | 3.344017214  | 1.03E-15 |
| ENSG00000169744 | LDB2     | -1.567982289 | 3.02E-06 |
| ENSG00000122367 | LDB3     | -2.17582976  | 7.78E-07 |
| ENSG00000134333 | LDHA     | 1.340697145  | 4.2E-06  |
| ENSG00000166816 | LDHD     | -1.570945863 | 0.000116 |
| ENSG00000130164 | LDLR     | 1.580387291  | 6.18E-10 |
| ENSG00000187942 | LDLRAD2  | -1.237872361 | 0.02541  |
| ENSG00000168675 | LDLRAD4  | -1.949368411 | 1.54E-10 |
| ENSG00000186007 | LEMD1    | 4.174062432  | 1.25E-09 |
| ENSG00000166477 | LEO1     | 1.187986283  | 1.29E-15 |
| ENSG00000174697 | LEP      | -5.465991651 | 1.12E-10 |
| ENSG00000116678 | LEPR     | -1.823455803 | 4.82E-14 |
| ENSG00000104660 | LEPROTL1 | 1.057968259  | 2.04E-05 |
| ENSG00000162398 | LEXM     | 3.731011367  | 4.8E-08  |
| ENSG00000106003 | LFNG     | -1.504459481 | 1.71E-12 |
| ENSG00000133317 | LGALS12  | -4.463947507 | 2.46E-06 |
| ENSG00000171747 | LGALS4   | -1.574489748 | 0.001472 |
| ENSG00000178934 | LGALS7B  | 1.659385278  | 0.000172 |
| ENSG00000170298 | LGALS9B  | 4.02033139   | 1.02E-08 |
| ENSG00000171916 | LGALS9C  | 7.438154832  | 1.76E-14 |
| ENSG00000119862 | LGALSL   | 1.620338202  | 5.09E-09 |
| ENSG00000108231 | LGI1     | -4.697878215 | 1.26E-07 |
| ENSG00000153902 | LGI4     | -2.345990264 | 3.58E-08 |
| ENSG00000139292 | LGR5     | -2.565425164 | 6.83E-07 |
| ENSG00000138039 | LHCGR    | -3.948051538 | 6.01E-05 |
| ENSG00000183722 | LHFPL6   | -1.791795479 | 2.93E-12 |
| ENSG00000106852 | LHX6     | -1.577030386 | 2.53E-06 |
| ENSG00000128342 | LIF      | -2.743959057 | 2.76E-10 |
| ENSG00000113594 | LIFR     | -2.850733462 | 7.15E-19 |
| ENSG00000187116 | LILRA5   | 3.540343181  | 0.000334 |
| ENSG00000104972 | LILRB1   | -1.016889515 | 0.04658  |
| ENSG00000105609 | LILRB5   | -1.371288026 | 0.016196 |

|                 |           |              |          |
|-----------------|-----------|--------------|----------|
| ENSG00000072163 | LIMS2     | -1.927581254 | 2.34E-10 |
| ENSG00000111052 | LIN7A     | -1.600948209 | 0.009391 |
| ENSG00000263874 | LINC00672 | -1.584014203 | 0.000136 |
| ENSG00000169783 | LINGO1    | -1.095361048 | 0.003606 |
| ENSG00000166035 | LIPC      | -1.372123446 | 0.009937 |
| ENSG00000079435 | LIPE      | -3.316554393 | 1.86E-13 |
| ENSG00000101670 | LIPG      | 3.104002122  | 3.16E-05 |
| ENSG00000163898 | LIPH      | -1.21888089  | 3.87E-06 |
| ENSG00000204021 | LIPK      | 1.426410741  | 1.72E-05 |
| ENSG00000173239 | LIPM      | 2.392554289  | 1.63E-10 |
| ENSG00000204020 | LIPN      | 2.922808373  | 4.03E-21 |
| ENSG00000271601 | LIX1L     | -1.104804929 | 2.23E-05 |
| ENSG00000071282 | LMCD1     | -1.836175018 | 1.35E-12 |
| ENSG00000113368 | LMNB1     | 1.336460044  | 4.23E-05 |
| ENSG00000176619 | LMNB2     | 1.359810952  | 7.37E-06 |
| ENSG00000048540 | LMO3      | -2.755097377 | 1.68E-12 |
| ENSG00000163431 | LMOD1     | -2.940457336 | 1.35E-22 |
| ENSG00000163380 | LMOD3     | -2.423452149 | 0.000717 |
| ENSG00000142235 | LMTK3     | 1.458608362  | 1.05E-06 |
| ENSG00000170500 | LONRF2    | -2.701230247 | 3.85E-07 |
| ENSG00000175556 | LONRF3    | -2.138499392 | 0.00014  |
| ENSG00000203782 | LOR       | 3.738525155  | 2.25E-10 |
| ENSG00000138131 | LOXL4     | -2.837307134 | 4.17E-20 |
| ENSG00000198121 | LPAR1     | -1.685216527 | 4.38E-08 |
| ENSG00000171517 | LPAR3     | 1.256713984  | 5.89E-07 |
| ENSG00000134324 | LPIN1     | -1.172965462 | 6.63E-07 |
| ENSG00000175445 | LPL       | -3.861421939 | 2.96E-11 |
| ENSG00000145012 | LPP       | -1.027004735 | 7.93E-06 |
| ENSG00000121207 | LRAT      | 1.537502006  | 0.001626 |
| ENSG00000130224 | LRCH2     | -1.56903069  | 0.014462 |
| ENSG00000128011 | LRFN1     | -1.184555204 | 0.003913 |
| ENSG00000156564 | LRFN2     | 4.392263586  | 9.78E-05 |
| ENSG00000165379 | LRFN5     | -3.635240577 | 5.91E-08 |
| ENSG00000144749 | LRIG1     | -1.931697383 | 2.27E-16 |
| ENSG00000148655 | LRMDA     | -1.312560943 | 0.000352 |
| ENSG00000123384 | LRP1      | -1.045204773 | 0.003163 |
| ENSG00000168702 | LRP1B     | -3.252536851 | 6.79E-07 |
| ENSG00000162337 | LRP5      | -1.050477576 | 1.16E-08 |
| ENSG00000070018 | LRP6      | -1.012550553 | 6.62E-05 |
| ENSG00000157193 | LRP8      | 1.704597891  | 1.14E-08 |
| ENSG00000165501 | LRR1      | 1.07772887   | 0.001033 |
| ENSG00000128606 | LRRC17    | -1.524410432 | 0.002019 |
| ENSG00000165383 | LRRC18    | -2.885531091 | 0.033205 |
| ENSG00000163827 | LRRC2     | -2.231954919 | 1.43E-06 |
| ENSG00000172731 | LRRC20    | 1.738719332  | 1.43E-06 |
| ENSG00000137507 | LRRC32    | -1.455564541 | 1.5E-06  |
| ENSG00000171757 | LRRC34    | -1.86857483  | 9.88E-06 |
| ENSG00000159708 | LRRC36    | -3.109145954 | 0.000118 |

|                 |           |              |          |
|-----------------|-----------|--------------|----------|
| ENSG00000176809 | LRRRC37A3 | -1.44296054  | 1.99E-09 |
| ENSG00000128594 | LRRRC4    | 3.080554751  | 1.28E-08 |
| ENSG00000148948 | LRRRC4C   | -2.385573583 | 0.000477 |
| ENSG00000108829 | LRRRC59   | 1.445236798  | 2.1E-06  |
| ENSG00000127399 | LRRRC61   | 1.60371538   | 1.64E-11 |
| ENSG00000181350 | LRRRC75A  | -1.361159349 | 0.000365 |
| ENSG00000171017 | LRRRC8E   | 1.079634276  | 5.08E-08 |
| ENSG00000133739 | LRRCC1    | -1.097706829 | 0.000763 |
| ENSG00000133640 | LRRRIQ1   | -1.792789269 | 0.00041  |
| ENSG00000175928 | LRRN1     | -1.791263378 | 1.03E-05 |
| ENSG00000170382 | LRRN2     | -1.869066693 | 0.049255 |
| ENSG00000173114 | LRRN3     | -2.116657548 | 6.02E-06 |
| ENSG00000177363 | LRRN4CL   | -1.957130201 | 5.13E-08 |
| ENSG00000162951 | LRRTM1    | -2.450181629 | 0.02974  |
| ENSG00000146006 | LRRTM2    | -2.889677099 | 1.44E-05 |
| ENSG00000176204 | LRRTM4    | -2.887077883 | 0.013778 |
| ENSG00000185565 | LSAMP     | -1.222386525 | 0.001296 |
| ENSG00000130332 | LSM7      | 1.012780334  | 4.55E-07 |
| ENSG00000179564 | LSMEM2    | -3.097740837 | 0.045723 |
| ENSG00000213903 | LTB4R     | 1.180389508  | 4.25E-07 |
| ENSG00000213906 | LTB4R2    | 1.893926873  | 4.22E-09 |
| ENSG00000168056 | LTBP3     | -1.406220591 | 3.15E-08 |
| ENSG00000090006 | LTBP4     | -1.203312446 | 3.44E-07 |
| ENSG00000213316 | LTC4S     | -1.503844945 | 0.002395 |
| ENSG00000062524 | LTK       | -1.188968718 | 0.048797 |
| ENSG00000108848 | LUC7L3    | -1.168218446 | 0.000366 |
| ENSG00000187398 | LUZP2     | -2.229726585 | 0.00157  |
| ENSG00000172901 | LVRN      | -3.392236352 | 1.33E-10 |
| ENSG00000167656 | LY6D      | 2.820551885  | 1.63E-20 |
| ENSG00000204421 | LY6G6C    | 3.470834567  | 2.12E-24 |
| ENSG00000054219 | LY75      | -1.572334356 | 3.11E-06 |
| ENSG00000185674 | LYG2      | 6.621722095  | 0.004005 |
| ENSG00000104903 | LYL1      | -1.07974127  | 0.009965 |
| ENSG00000150551 | LYPD1     | 3.019620557  | 2.26E-05 |
| ENSG00000197353 | LYPD2     | 2.823194876  | 0.000332 |
| ENSG00000124466 | LYPD3     | 2.960574955  | 2.87E-17 |
| ENSG00000159871 | LYPD5     | 3.680381315  | 2.1E-20  |
| ENSG00000120992 | LYPLA1    | 1.525043761  | 1.57E-06 |
| ENSG00000232859 | LYRM9     | -1.684300902 | 2.49E-11 |
| ENSG00000133800 | LYVE1     | -1.448786132 | 0.000947 |
| ENSG00000088899 | LZTS3     | -1.428544522 | 6.96E-09 |
| ENSG00000159374 | M1AP      | -2.359196612 | 0.000731 |
| ENSG00000183833 | MAATS1    | -3.305975945 | 4.86E-10 |
| ENSG00000180660 | MAB21L1   | -4.375995702 | 6.49E-06 |
| ENSG00000172264 | MACROD2   | -2.121031112 | 1.91E-13 |
| ENSG00000164109 | MAD2L1    | 1.882467104  | 3.89E-07 |
| ENSG00000099866 | MADCAM1   | -2.035418018 | 0.002289 |
| ENSG00000178573 | MAF       | 1.031030785  | 1.59E-05 |



|                 |          |              |          |
|-----------------|----------|--------------|----------|
| ENSG00000204103 | MAFB     | 1.368214921  | 1.32E-09 |
| ENSG00000185022 | MAFF     | 1.029333525  | 0.000374 |
| ENSG00000187391 | MAGI2    | -1.88590791  | 7.45E-10 |
| ENSG00000172005 | MAL      | -1.067755703 | 0.000634 |
| ENSG00000147676 | MAL2     | 1.868461993  | 9.76E-08 |
| ENSG00000144063 | MALL     | 2.709136486  | 3.2E-10  |
| ENSG00000165072 | MAMDC2   | -1.790150521 | 1.51E-08 |
| ENSG00000184384 | MAML2    | -1.082851166 | 1.87E-05 |
| ENSG00000117643 | MAN1C1   | -1.333965896 | 0.000417 |
| ENSG00000196547 | MAN2A2   | -1.369802512 | 1.33E-07 |
| ENSG00000145050 | MANF     | 1.447478556  | 1.02E-11 |
| ENSG00000189221 | MAOA     | -1.925277643 | 1.7E-08  |
| ENSG00000069535 | MAOB     | -1.061128437 | 3.66E-05 |
| ENSG00000166963 | MAP1A    | -1.953187167 | 1.38E-06 |
| ENSG00000131711 | MAP1B    | -1.769713174 | 8.17E-08 |
| ENSG00000078018 | MAP2     | 1.220979345  | 8.01E-06 |
| ENSG00000107968 | MAP3K8   | 1.353275853  | 6.7E-09  |
| ENSG00000006432 | MAP3K9   | 2.117639069  | 4.05E-19 |
| ENSG00000171533 | MAP6     | -2.844357121 | 3.04E-11 |
| ENSG00000135525 | MAP7     | 1.138295509  | 2.34E-07 |
| ENSG00000116871 | MAP7D1   | 1.199758608  | 0.000596 |
| ENSG00000164114 | MAP9     | -1.237351652 | 1.79E-05 |
| ENSG00000109339 | MAPK10   | -2.030810057 | 3.2E-07  |
| ENSG00000156711 | MAPK13   | 1.823037248  | 2.99E-10 |
| ENSG00000181085 | MAPK15   | -1.351153085 | 0.005088 |
| ENSG00000141639 | MAPK4    | -3.019646666 | 1.24E-10 |
| ENSG00000069956 | MAPK6    | 1.94246451   | 1.24E-14 |
| ENSG00000121653 | MAPK8IP1 | -1.287593113 | 9.76E-07 |
| ENSG00000114738 | MAPKAPK3 | 1.612984513  | 1.8E-07  |
| ENSG00000186868 | MAPT     | -1.517745518 | 7.61E-05 |
| ENSG00000186205 | MARC1    | -2.964120046 | 3.37E-14 |
| ENSG00000117791 | MARC2    | -2.447968211 | 3.38E-17 |
| ENSG00000173926 | MARCH3   | 1.417747161  | 9.1E-06  |
| ENSG00000019169 | MARCO    | -1.437690546 | 0.004313 |
| ENSG00000166986 | MARS     | 1.077391223  | 3.13E-09 |
| ENSG00000204687 | MAS1L    | -3.469251274 | 0.00156  |
| ENSG00000151224 | MAT1A    | -3.830758842 | 2.43E-09 |
| ENSG00000132561 | MATN2    | -1.695487084 | 3.27E-11 |
| ENSG00000132031 | MATN3    | -1.541926113 | 0.006467 |
| ENSG00000124159 | MATN4    | -2.728548887 | 3.63E-05 |
| ENSG00000198125 | MB       | -2.425089777 | 2.08E-07 |
| ENSG00000143797 | MBOAT2   | 1.611331566  | 3.99E-10 |
| ENSG00000076706 | MCAM     | -1.085144412 | 0.000196 |
| ENSG00000126217 | MCF2L    | -1.612751454 | 1.75E-07 |
| ENSG00000053524 | MCF2L2   | -1.069485344 | 0.035952 |
| ENSG00000128285 | MCHR1    | 2.88344714   | 4.5E-07  |
| ENSG00000065328 | MCM10    | 2.059331369  | 4.71E-06 |
| ENSG00000055732 | MCOLN3   | -1.321407909 | 0.000205 |



|                 |         |              |          |
|-----------------|---------|--------------|----------|
| ENSG00000005059 | MCUB    | 1.339949349  | 2.17E-06 |
| ENSG00000112559 | MDFI    | 1.809519535  | 3.13E-08 |
| ENSG00000110492 | MDK     | -1.253809986 | 2.36E-05 |
| ENSG00000151376 | ME3     | -1.325108703 | 3.46E-07 |
| ENSG00000159479 | MED8    | 1.542966306  | 6.71E-07 |
| ENSG00000081189 | MEF2C   | -1.286503745 | 0.000214 |
| ENSG00000103313 | MEFV    | 3.040575277  | 0.00051  |
| ENSG00000145794 | MEGF10  | -1.782167213 | 8.08E-07 |
| ENSG00000162591 | MEGF6   | -1.946362558 | 3.42E-08 |
| ENSG00000165304 | MELK    | 2.288235632  | 5.39E-14 |
| ENSG00000163975 | MELTF   | -2.592586795 | 2.1E-08  |
| ENSG00000005102 | MEOX1   | -1.557212717 | 2.53E-06 |
| ENSG00000106511 | MEOX2   | -1.945411829 | 6.01E-07 |
| ENSG00000153208 | MERTK   | -2.159549222 | 2.59E-13 |
| ENSG00000166823 | MESP1   | -1.892130142 | 0.000918 |
| ENSG00000188095 | MESP2   | 2.476028791  | 0.002226 |
| ENSG00000106484 | MEST    | -1.921057329 | 3.48E-08 |
| ENSG00000164024 | METAP1  | 1.026208585  | 3.4E-06  |
| ENSG00000176845 | METRNL  | 1.847341565  | 6.41E-10 |
| ENSG00000053328 | METTL24 | -2.137391158 | 0.018034 |
| ENSG00000170439 | METTL7B | -3.209841099 | 0.006544 |
| ENSG00000166482 | MFAP4   | -2.643616654 | 6.7E-14  |
| ENSG00000197614 | MFAP5   | -2.042443644 | 4.64E-07 |
| ENSG00000147324 | MFHAS1  | 1.902517466  | 9.25E-27 |
| ENSG00000138111 | MFSD13A | 1.031751128  | 0.000356 |
| ENSG00000205639 | MFSD2B  | 2.475999643  | 1.2E-06  |
| ENSG00000174514 | MFSD4A  | -3.24280462  | 2.24E-15 |
| ENSG00000182544 | MFSD5   | 1.506700545  | 4.93E-10 |
| ENSG00000128268 | MGAT3   | -2.090410409 | 7.36E-13 |
| ENSG00000071073 | MGAT4A  | -1.07794226  | 8.9E-11  |
| ENSG00000182050 | MGAT4C  | -3.433932328 | 0.003513 |
| ENSG00000074416 | MGLL    | -1.086077554 | 8.85E-05 |
| ENSG00000111341 | MGP     | -1.864280207 | 8.99E-08 |
| ENSG00000008394 | MGST1   | -1.207053976 | 0.002037 |
| ENSG00000100139 | MICALL1 | 1.839493862  | 3.03E-17 |
| ENSG00000155970 | MICU3   | -2.335944877 | 1.61E-07 |
| ENSG00000080561 | MID2    | 1.185429305  | 0.004041 |
| ENSG00000271605 | MILR1   | -1.092855552 | 0.037255 |
| ENSG00000107789 | MINPP1  | 1.081528639  | 0.000111 |
| ENSG00000151338 | MIPOL1  | -1.309055139 | 1.22E-07 |
| ENSG00000187098 | MITF    | -1.199479729 | 7.12E-05 |
| ENSG00000148773 | MKI67   | 1.237602118  | 9.28E-05 |
| ENSG00000150051 | MKX     | -2.203294819 | 0.000162 |
| ENSG00000100427 | MLC1    | -1.444206248 | 0.000304 |
| ENSG00000213190 | MLLT11  | 1.623557686  | 2.59E-05 |
| ENSG00000115648 | MLPH    | -1.733834017 | 1.7E-10  |
| ENSG00000009950 | MLXIPL  | -3.495552825 | 1.32E-07 |
| ENSG00000168288 | MMADHC  | 1.173081504  | 8.74E-07 |

|                 |         |              |          |
|-----------------|---------|--------------|----------|
| ENSG00000108960 | MMD     | -1.38559108  | 2.49E-05 |
| ENSG00000196549 | MME     | -1.942272993 | 0.007055 |
| ENSG00000142606 | MMEL1   | -2.792764526 | 0.010954 |
| ENSG00000196611 | MMP1    | 10.18599388  | 8.51E-20 |
| ENSG00000166670 | MMP10   | 8.268263823  | 1.87E-12 |
| ENSG00000262406 | MMP12   | 3.310180864  | 0.005465 |
| ENSG00000137745 | MMP13   | 2.797385076  | 1.67E-05 |
| ENSG00000149968 | MMP3    | 2.479028211  | 0.009962 |
| ENSG00000137673 | MMP7    | -2.362109441 | 2.27E-07 |
| ENSG00000138722 | MMRN1   | -1.091273978 | 0.042755 |
| ENSG00000173269 | MMRN2   | -1.07383968  | 5.4E-05  |
| ENSG00000124615 | MOCS1   | -1.029931184 | 0.001035 |
| ENSG00000124003 | MOGAT1  | -2.533636428 | 0.01305  |
| ENSG00000166391 | MOGAT2  | -1.928080548 | 0.039219 |
| ENSG00000139714 | MORN3   | -1.039859316 | 0.004001 |
| ENSG00000101928 | MOSPD1  | 1.125988502  | 8.26E-06 |
| ENSG00000107186 | MPDZ    | -1.659340681 | 2.15E-09 |
| ENSG00000117400 | MPL     | 3.950919783  | 4.79E-05 |
| ENSG00000108852 | MPP2    | -1.116040901 | 0.015978 |
| ENSG00000150054 | MPP7    | 1.306830972  | 5.34E-07 |
| ENSG00000186732 | MPPED1  | -3.561663719 | 4.15E-07 |
| ENSG00000066382 | MPPED2  | -2.771309993 | 3.32E-09 |
| ENSG00000156968 | MPV17L  | -1.763029883 | 2.53E-07 |
| ENSG00000158887 | MPZ     | -3.011525999 | 7.24E-15 |
| ENSG00000149573 | MPZL2   | 2.692453178  | 3.93E-21 |
| ENSG00000160588 | MPZL3   | 2.595815803  | 6.48E-25 |
| ENSG00000170262 | MRAP    | -3.675052191 | 3.99E-10 |
| ENSG00000158186 | MRAS    | -2.611872625 | 7.37E-17 |
| ENSG00000260314 | MRC1    | -1.173875945 | 0.009689 |
| ENSG00000118242 | MREG    | 2.246559606  | 1.26E-15 |
| ENSG00000172935 | MRGPRF  | -1.299436642 | 0.00014  |
| ENSG00000134042 | MRO     | -3.842302695 | 1.69E-10 |
| ENSG00000184313 | MROH7   | -2.019234784 | 1.65E-05 |
| ENSG00000172172 | MRPL13  | 1.144134159  | 4.78E-05 |
| ENSG00000180992 | MRPL14  | 1.006995226  | 4.9E-05  |
| ENSG00000158042 | MRPL17  | 1.029369949  | 1.33E-05 |
| ENSG00000108826 | MRPL27  | 1.046121143  | 9.59E-06 |
| ENSG00000111639 | MRPL51  | 1.150990353  | 3.58E-07 |
| ENSG00000128626 | MRPS12  | 1.024705451  | 0.000192 |
| ENSG00000072952 | MRVI1   | -1.277181684 | 1.93E-05 |
| ENSG00000149534 | MS4A2   | -2.080904323 | 1.65E-05 |
| ENSG00000110079 | MS4A4A  | -1.612680856 | 0.002085 |
| ENSG00000066697 | MSANTD3 | 1.072920808  | 3.34E-06 |
| ENSG00000057468 | MSH4    | -3.391147962 | 0.01328  |
| ENSG00000135097 | MSI1    | -1.706765501 | 0.008189 |
| ENSG00000102854 | MSLN    | -2.689956684 | 0.000352 |
| ENSG00000215183 | MSMP    | 2.365301579  | 0.012422 |
| ENSG00000174099 | MSRB3   | -1.878307675 | 3.43E-13 |

|                 |         |              |          |
|-----------------|---------|--------------|----------|
| ENSG00000173531 | MST1    | -1.076135414 | 0.014176 |
| ENSG00000163132 | MSX1    | -1.373695527 | 0.00044  |
| ENSG00000125144 | MT1G    | 1.094467717  | 0.009749 |
| ENSG00000125148 | MT2A    | 1.465603048  | 0.000123 |
| ENSG00000168502 | MTCL1   | 1.655336258  | 1.44E-06 |
| ENSG00000242114 | MTFP1   | 2.219945309  | 0.034188 |
| ENSG00000146410 | MTFR2   | 1.196623506  | 0.003651 |
| ENSG00000120254 | MTHFD1L | 1.273636249  | 0.000453 |
| ENSG00000065911 | MTHFD2  | 1.326700998  | 1.6E-07  |
| ENSG00000003987 | MTMR7   | -2.602010495 | 1.18E-08 |
| ENSG00000116984 | MTR     | -1.05223147  | 5.91E-05 |
| ENSG00000180354 | MTURN   | -1.558332762 | 6.58E-14 |
| ENSG00000132938 | MTUS2   | -2.055539304 | 0.01732  |
| ENSG00000181143 | MUC16   | -2.42270257  | 1.83E-05 |
| ENSG00000176945 | MUC20   | -1.955893457 | 1.52E-06 |
| ENSG00000117983 | MUC5B   | -2.38369689  | 0.00541  |
| ENSG00000184956 | MUC6    | -2.186317203 | 0.013842 |
| ENSG00000171195 | MUC7    | -3.342747647 | 6.66E-05 |
| ENSG00000172551 | MUCL1   | -2.929533744 | 5.07E-15 |
| ENSG00000157601 | MX1     | 1.737091064  | 2.62E-07 |
| ENSG00000059728 | MXD1    | 2.612464546  | 2.01E-14 |
| ENSG00000182534 | MXRA7   | -1.115251304 | 2.45E-07 |
| ENSG00000162576 | MXRA8   | -1.52877295  | 2.7E-05  |
| ENSG00000179820 | MYADM   | -1.177540078 | 0.000515 |
| ENSG00000101057 | MYBL2   | 2.257915975  | 2.7E-09  |
| ENSG00000196091 | MYBPC1  | -2.993040957 | 7.82E-07 |
| ENSG00000136997 | MYC     | 1.559117211  | 4.05E-12 |
| ENSG00000116990 | MYCL    | 1.185236948  | 3.13E-06 |
| ENSG00000120279 | MYCT1   | -1.487827862 | 1.2E-05  |
| ENSG00000172936 | MYD88   | 1.423045141  | 8.15E-10 |
| ENSG00000104177 | MYEF2   | -2.07921557  | 8.85E-12 |
| ENSG00000172927 | MYEOV   | -2.982251483 | 1.61E-14 |
| ENSG00000109061 | MYH1    | -3.997956206 | 0.012794 |
| ENSG00000133392 | MYH11   | -3.170163135 | 2.2E-14  |
| ENSG00000006788 | MYH13   | 5.745733704  | 4.94E-06 |
| ENSG00000105357 | MYH14   | -1.562027799 | 2.89E-06 |
| ENSG00000144821 | MYH15   | 1.223773877  | 0.017745 |
| ENSG00000109063 | MYH3    | -1.496732249 | 4.05E-06 |
| ENSG00000078814 | MYH7B   | -2.263028231 | 0.001371 |
| ENSG00000118680 | MYL12B  | 1.058469676  | 1.15E-06 |
| ENSG00000101335 | MYL9    | -2.459290167 | 3.23E-18 |
| ENSG00000065534 | MYLK    | -2.099862861 | 1.85E-11 |
| ENSG00000180209 | MYLPF   | -1.664358614 | 0.027272 |
| ENSG00000262179 | MYMX    | -3.873965516 | 7.47E-09 |
| ENSG00000091536 | MYO15A  | -1.881629118 | 0.002845 |
| ENSG00000266714 | MYO15B  | -1.454837934 | 5.62E-05 |
| ENSG00000128641 | MYO1B   | 1.629694395  | 1.03E-11 |
| ENSG00000174527 | MYO1H   | 2.93820051   | 3.98E-09 |

|                 |          |              |          |
|-----------------|----------|--------------|----------|
| ENSG00000095777 | MYO3A    | -3.936598128 | 6.71E-09 |
| ENSG00000197535 | MYO5A    | 1.123710297  | 2.76E-06 |
| ENSG00000167306 | MYO5B    | 1.18625299   | 0.001406 |
| ENSG00000128833 | MYO5C    | -1.627273548 | 8.94E-28 |
| ENSG00000137474 | MYO7A    | -1.496698685 | 0.002929 |
| ENSG00000034971 | MYOC     | -4.43666486  | 5.86E-16 |
| ENSG00000141052 | MYOCD    | -2.867689716 | 1.24E-10 |
| ENSG00000101605 | MYOM1    | -2.761101243 | 5.13E-14 |
| ENSG00000036448 | MYOM2    | -1.754110267 | 1.26E-09 |
| ENSG00000142661 | MYOM3    | 1.550059212  | 3.3E-05  |
| ENSG00000120729 | MYOT     | -2.111691331 | 0.002786 |
| ENSG00000164591 | MYOZ3    | -1.012065216 | 0.041704 |
| ENSG00000138347 | MYPN     | 2.622609395  | 0.024004 |
| ENSG00000124920 | MYRF     | -2.955679426 | 4.47E-08 |
| ENSG00000170011 | MYRIP    | -2.368154007 | 4.88E-08 |
| ENSG00000139597 | N4BP2L1  | -1.923933725 | 3.2E-11  |
| ENSG00000173418 | NAA20    | 1.008796808  | 9.09E-05 |
| ENSG00000077616 | NAALAD2  | -2.524580462 | 1.97E-14 |
| ENSG00000177694 | NAALADL2 | -2.060340742 | 1.83E-12 |
| ENSG00000173559 | NABP1    | 1.225096491  | 0.000291 |
| ENSG00000136274 | NACAD    | -2.290861323 | 5.25E-08 |
| ENSG00000161653 | NAGS     | 2.173291641  | 0.000319 |
| ENSG00000102452 | NALCN    | -2.95297281  | 4.77E-06 |
| ENSG00000186462 | NAP1L2   | -1.797913277 | 2.88E-12 |
| ENSG00000186310 | NAP1L3   | -2.390781747 | 4.82E-07 |
| ENSG00000185818 | NAT8L    | -2.683858586 | 1.97E-07 |
| ENSG00000172915 | NBEA     | -2.598098138 | 1.01E-11 |
| ENSG00000160796 | NBEAL2   | 1.153458336  | 5.25E-05 |
| ENSG00000263956 | NBPF11   | -1.105963364 | 0.0009   |
| ENSG00000268043 | NBPF12   | -1.033689535 | 0.001826 |
| ENSG00000104490 | NCALD    | -2.564054511 | 5.39E-14 |
| ENSG00000149294 | NCAM1    | -2.35649809  | 1.19E-10 |
| ENSG00000154654 | NCAM2    | -2.236707751 | 3.04E-05 |
| ENSG00000109805 | NCAPG    | 1.799087378  | 6.78E-09 |
| ENSG00000121152 | NCAPH    | 1.860582634  | 2.76E-10 |
| ENSG00000188505 | NCCRP1   | 4.108431057  | 5.66E-24 |
| ENSG00000020129 | NCDN     | 1.308448901  | 2.4E-07  |
| ENSG00000158517 | NCF1     | 2.215325245  | 0.004689 |
| ENSG00000184454 | NCMAP    | -2.108094486 | 0.005752 |
| ENSG00000080986 | NDC80    | 1.309153973  | 2.34E-06 |
| ENSG00000166579 | NDEL1    | 1.444160878  | 1.26E-07 |
| ENSG00000182636 | NDN      | -1.429223259 | 1.09E-08 |
| ENSG00000173376 | NDNF     | -3.806824687 | 2.23E-13 |
| ENSG00000104419 | NDRG1    | 1.22080821   | 2.73E-06 |
| ENSG00000165795 | NDRG2    | -1.035116577 | 1.69E-07 |
| ENSG00000103034 | NDRG4    | 2.046444127  | 4.85E-15 |
| ENSG00000166507 | NDST2    | -1.240294447 | 0.033506 |
| ENSG00000185633 | NDUFA4L2 | 2.201168725  | 9.26E-17 |

|                 |           |              |          |
|-----------------|-----------|--------------|----------|
| ENSG00000123119 | NECAB1    | -4.761810778 | 1.07E-15 |
| ENSG00000110400 | NECTIN1   | 1.70382684   | 3.42E-09 |
| ENSG00000177707 | NECTIN3   | -1.450140347 | 2.01E-06 |
| ENSG00000143217 | NECTIN4   | 1.395426504  | 1.54E-10 |
| ENSG00000049759 | NEDD4L    | -1.231627084 | 1.89E-07 |
| ENSG00000111859 | NEDD9     | -1.525081757 | 6.57E-05 |
| ENSG00000277586 | NEFL      | 2.767305848  | 9.04E-07 |
| ENSG00000104722 | NEFM      | 2.260973605  | 8.35E-06 |
| ENSG00000172260 | NEGR1     | -2.188513547 | 2.74E-08 |
| ENSG00000140398 | NEIL1     | -1.225882065 | 0.00537  |
| ENSG00000109674 | NEIL3     | 1.443712271  | 0.003428 |
| ENSG00000117650 | NEK2      | 1.945593266  | 2.2E-08  |
| ENSG00000119408 | NEK6      | -1.028483764 | 2.09E-07 |
| ENSG00000165973 | NELL1     | -3.513522716 | 2.66E-05 |
| ENSG00000184613 | NELL2     | 4.107338645  | 5.37E-14 |
| ENSG00000132688 | NES       | -1.208086307 | 0.000137 |
| ENSG00000171208 | NETO2     | 3.137714256  | 2.89E-15 |
| ENSG00000115488 | NEU2      | 6.886372148  | 7.42E-24 |
| ENSG00000171532 | NEUROD2   | -2.115042466 | 0.042172 |
| ENSG00000050030 | NEXMIF    | -2.055468369 | 4.22E-07 |
| ENSG00000162614 | NEXN      | -2.238525423 | 1.68E-14 |
| ENSG00000123405 | NFE2      | 2.079518892  | 7.45E-06 |
| ENSG00000050344 | NFE2L3    | 1.435857926  | 1.29E-11 |
| ENSG00000162599 | NFIA      | -1.048138172 | 0.000251 |
| ENSG00000147862 | NFIB      | -1.420626856 | 7.23E-06 |
| ENSG00000008441 | NFIX      | -1.097261432 | 1.39E-05 |
| ENSG00000134259 | NGF       | 3.730124878  | 4.87E-10 |
| ENSG00000064300 | NGFR      | -2.075648706 | 3.18E-08 |
| ENSG00000257108 | NHLRC4    | -1.812837052 | 0.037325 |
| ENSG00000145912 | NHP2      | 1.126424277  | 6.23E-06 |
| ENSG00000204131 | NHSL2     | -1.33296188  | 9.92E-05 |
| ENSG00000131669 | NINJ1     | -1.47998224  | 3.79E-08 |
| ENSG00000101004 | NINL      | -1.44438093  | 3.32E-07 |
| ENSG00000132603 | NIP7      | 1.177285382  | 9.88E-08 |
| ENSG00000163293 | NIPAL1    | 1.516341477  | 1.84E-09 |
| ENSG00000104361 | NIPAL2    | 1.087057279  | 9.31E-06 |
| ENSG00000172548 | NIPAL4    | 2.497599654  | 1.85E-16 |
| ENSG00000165028 | NIPSNAP3B | -1.70348367  | 6.85E-06 |
| ENSG00000084628 | NKAIN1    | 2.555142884  | 1.83E-06 |
| ENSG00000189134 | NKAPL     | -1.447528888 | 5.83E-06 |
| ENSG00000179846 | NKPD1     | 1.479364891  | 3.13E-13 |
| ENSG00000114857 | NKTR      | -1.091234851 | 0.001191 |
| ENSG00000169760 | NLGN1     | -2.389655301 | 8.68E-09 |
| ENSG00000196338 | NLGN3     | -1.588580311 | 0.001024 |
| ENSG00000146938 | NLGN4X    | 1.580303623  | 6.47E-06 |
| ENSG00000182261 | NLRP10    | 2.596594848  | 1.26E-15 |
| ENSG00000142405 | NLRP12    | -1.754852947 | 0.023459 |
| ENSG00000022556 | NLRP2     | 2.316433705  | 1E-07    |

|                 |         |              |          |
|-----------------|---------|--------------|----------|
| ENSG00000160703 | NLRX1   | 1.586104814  | 4.11E-10 |
| ENSG00000112981 | NME5    | -1.634999869 | 0.013662 |
| ENSG00000181322 | NME9    | -2.319364816 | 0.013177 |
| ENSG00000123609 | NMI     | 1.535922136  | 1.23E-09 |
| ENSG00000157064 | NMNAT2  | -1.89555779  | 6.47E-06 |
| ENSG00000109255 | NMU     | 3.073560461  | 1.32E-19 |
| ENSG00000171596 | NMUR1   | -3.264596645 | 1.5E-07  |
| ENSG00000053438 | NNAT    | -3.832165472 | 1.14E-19 |
| ENSG00000151014 | NOCT    | 2.483840161  | 3.5E-08  |
| ENSG00000167207 | NOD2    | 2.021831236  | 8.8E-18  |
| ENSG00000156574 | NODAL   | 3.602126819  | 0.005201 |
| ENSG00000183691 | NOG     | -2.199554021 | 0.035501 |
| ENSG00000197183 | NOL4L   | -1.16682975  | 0.000706 |
| ENSG00000182117 | NOP10   | 1.466853904  | 2.53E-07 |
| ENSG00000048162 | NOP16   | 1.285075405  | 4.37E-09 |
| ENSG00000198929 | NOS1AP  | -1.894861245 | 4.28E-06 |
| ENSG00000007171 | NOS2    | -4.410898118 | 7.59E-05 |
| ENSG00000163072 | NOSTRIN | -1.993435358 | 1.86E-15 |
| ENSG00000204301 | NOTCH4  | -1.260549468 | 7.72E-05 |
| ENSG00000185269 | NOTUM   | -1.120169329 | 0.021213 |
| ENSG00000136999 | NOV     | -1.436360924 | 2.11E-05 |
| ENSG00000139910 | NOVA1   | -3.246832856 | 7.26E-13 |
| ENSG00000104967 | NOVA2   | -1.178909769 | 0.007911 |
| ENSG00000255346 | NOX5    | 1.241113848  | 0.023899 |
| ENSG00000151322 | NPAS3   | -2.702849403 | 1.98E-07 |
| ENSG00000174576 | NPAS4   | -2.870661608 | 0.008286 |
| ENSG00000107281 | NPDC1   | -1.184412543 | 2.54E-05 |
| ENSG00000144061 | NPHP1   | -1.433628817 | 1.39E-05 |
| ENSG00000183426 | NPIPA1  | -1.166587964 | 0.005198 |
| ENSG00000198156 | NPIPB6  | -2.118426996 | 0.003301 |
| ENSG00000107833 | NPM3    | 1.190648329  | 0.000212 |
| ENSG00000169418 | NPR1    | -1.680840478 | 8.61E-09 |
| ENSG00000171246 | NPTX1   | 2.417994281  | 0.011245 |
| ENSG00000221890 | NPTXR   | -2.254232004 | 5.91E-11 |
| ENSG00000164128 | NPY1R   | -2.5328658   | 9.11E-10 |
| ENSG00000164129 | NPY5R   | -3.703413629 | 2.69E-10 |
| ENSG00000025434 | NR1H3   | -1.330792358 | 3.73E-09 |
| ENSG00000175745 | NR2F1   | -2.234242563 | 5.05E-06 |
| ENSG00000185551 | NR2F2   | -1.663658645 | 6.07E-08 |
| ENSG00000151623 | NR3C2   | -3.145089527 | 1.93E-16 |
| ENSG00000123358 | NR4A1   | -1.268519537 | 0.000283 |
| ENSG00000116833 | NR5A2   | -1.22248748  | 0.001327 |
| ENSG00000198435 | NRARP   | 1.004929307  | 4.32E-05 |
| ENSG00000213281 | NRAS    | 1.135402764  | 4.06E-06 |
| ENSG00000148572 | NRBF2   | 1.444922883  | 9.89E-09 |
| ENSG00000134986 | NREP    | 1.092069549  | 3.31E-05 |
| ENSG00000157168 | NRG1    | 1.304407421  | 1.54E-07 |
| ENSG00000158458 | NRG2    | -1.451405914 | 1.66E-05 |

|                 |        |              |          |
|-----------------|--------|--------------|----------|
| ENSG00000185737 | NRG3   | -3.039434442 | 1.06E-05 |
| ENSG00000053702 | NRIP2  | -1.973084039 | 1.6E-06  |
| ENSG00000175352 | NRIP3  | 1.704582492  | 6.71E-07 |
| ENSG00000123572 | NRK    | -3.003568181 | 1.43E-07 |
| ENSG00000124785 | NRN1   | -2.04958831  | 7.77E-20 |
| ENSG00000099250 | NRP1   | -1.330379916 | 3.28E-07 |
| ENSG00000174004 | NRROS  | -1.298704212 | 1.99E-05 |
| ENSG00000179915 | NRXN1  | -3.052807456 | 3.5E-12  |
| ENSG00000110076 | NRXN2  | -1.796540424 | 6.01E-05 |
| ENSG00000021645 | NRXN3  | -2.681677739 | 6.88E-15 |
| ENSG00000168824 | NSG1   | 1.869760498  | 1.01E-17 |
| ENSG00000179299 | NSUN7  | -1.641269571 | 0.000275 |
| ENSG00000122643 | NT5C3A | 1.228708773  | 1.59E-05 |
| ENSG00000185652 | NTF3   | -1.00707253  | 0.004982 |
| ENSG00000225950 | NTF4   | -1.078019978 | 0.001957 |
| ENSG00000182667 | NTM    | -1.975797209 | 1.94E-07 |
| ENSG00000065320 | NTN1   | -1.4393886   | 0.000237 |
| ENSG00000074527 | NTN4   | -2.241708052 | 2.86E-18 |
| ENSG00000142233 | NTN5   | -1.833141215 | 0.015906 |
| ENSG00000162631 | NTNG1  | -1.546482559 | 0.009698 |
| ENSG00000148053 | NTRK2  | -1.484087388 | 3.22E-07 |
| ENSG00000140538 | NTRK3  | -2.974073089 | 2.97E-14 |
| ENSG00000101188 | NTSR1  | 6.108243727  | 1.87E-10 |
| ENSG00000163545 | NUAK2  | 2.656750392  | 3.39E-12 |
| ENSG00000122824 | NUDT10 | -2.215064972 | 0.00327  |
| ENSG00000136159 | NUDT15 | 1.255941929  | 7.08E-09 |
| ENSG00000198585 | NUDT16 | -1.206729417 | 3.99E-07 |
| ENSG00000165609 | NUDT5  | 1.047674093  | 1.11E-06 |
| ENSG00000167799 | NUDT8  | 1.719029662  | 1.09E-09 |
| ENSG00000108559 | NUP88  | 1.072855876  | 7.5E-06  |
| ENSG00000137804 | NUSAP1 | 1.141339876  | 5.2E-05  |
| ENSG00000214562 | NUTM2D | -1.376975592 | 0.000112 |
| ENSG00000188039 | NWD1   | -2.209493631 | 2.56E-06 |
| ENSG00000174145 | NWD2   | 3.696322847  | 3.2E-06  |
| ENSG00000130045 | NXNL2  | -2.198638091 | 0.015781 |
| ENSG00000182575 | NXPH3  | -2.684669124 | 5.29E-07 |
| ENSG00000089127 | OAS1   | 2.329362334  | 2.74E-17 |
| ENSG00000111335 | OAS2   | 2.287919487  | 4.08E-12 |
| ENSG00000111331 | OAS3   | 2.041077918  | 1.16E-20 |
| ENSG00000135114 | OASL   | 5.083988928  | 4.22E-44 |
| ENSG00000122136 | OBP2A  | -3.043812109 | 1.01E-07 |
| ENSG00000171102 | OBP2B  | -3.089351228 | 3.13E-08 |
| ENSG00000124006 | OBSL1  | -1.03217437  | 3.76E-06 |
| ENSG00000145247 | OCIAD2 | 1.227175028  | 7.83E-08 |
| ENSG00000135175 | OCM2   | 4.802511394  | 0.00633  |
| ENSG00000115758 | ODC1   | 1.515528689  | 0.01712  |
| ENSG00000182950 | ODF3L1 | -1.886272656 | 0.005566 |
| ENSG00000106809 | OGN    | -2.828180703 | 2.76E-08 |



|                 |        |              |          |
|-----------------|--------|--------------|----------|
| ENSG00000104147 | OIP5   | 1.79440963   | 0.00276  |
| ENSG00000152463 | OLAH   | -1.990353746 | 0.029517 |
| ENSG00000183801 | OLFML1 | -1.951306907 | 1.2E-06  |
| ENSG00000116774 | OLFML3 | -1.831524851 | 3.64E-06 |
| ENSG00000184221 | OLIG1  | -2.250013054 | 0.01097  |
| ENSG00000173391 | OLR1   | 2.610064244  | 0.007491 |
| ENSG00000127083 | OMD    | -2.089855626 | 0.000388 |
| ENSG00000171199 | OPRPN  | -3.981867526 | 0.003857 |
| ENSG00000238243 | OR2W3  | 3.03139239   | 0.005782 |
| ENSG00000181074 | OR52N4 | -3.639053378 | 0.011771 |
| ENSG00000085840 | ORC1   | 1.791152881  | 2.65E-11 |
| ENSG00000091651 | ORC6   | 1.18385349   | 0.000693 |
| ENSG00000123353 | ORMDL2 | 1.685786181  | 3.83E-08 |
| ENSG00000184792 | OSBP2  | 1.087058438  | 4.92E-06 |
| ENSG00000006025 | OSBPL7 | -1.091098879 | 0.013244 |
| ENSG00000164823 | OSGIN2 | -1.207927902 | 9.64E-08 |
| ENSG00000099985 | OSM    | 4.519729269  | 0.003464 |
| ENSG00000143867 | OSR1   | -3.738122279 | 6.32E-18 |
| ENSG00000164920 | OSR2   | -2.851719732 | 3.44E-09 |
| ENSG00000165899 | OTOGL  | -2.289507218 | 0.003516 |
| ENSG00000163982 | OTOP1  | -1.656414962 | 0.045037 |
| ENSG00000183034 | OTOP2  | 4.192303141  | 9.26E-08 |
| ENSG00000182938 | OTOP3  | 5.345105288  | 1.43E-10 |
| ENSG00000089723 | OTUB2  | 2.674241605  | 2.26E-14 |
| ENSG00000183378 | OVCH2  | -1.80206796  | 0.023839 |
| ENSG00000085465 | OVGP1  | -1.095130194 | 0.010395 |
| ENSG00000172818 | OVOL1  | 2.572867403  | 4.17E-20 |
| ENSG00000162881 | OXER1  | -1.536382186 | 0.001346 |
| ENSG00000165621 | OXGR1  | -2.080944002 | 5.68E-06 |
| ENSG00000101405 | OXT    | -2.938585856 | 0.0142   |
| ENSG00000108405 | P2RX1  | -2.597507543 | 1.71E-10 |
| ENSG00000099957 | P2RX6  | -2.274373663 | 0.000968 |
| ENSG00000169860 | P2RY1  | 1.725819718  | 6.98E-17 |
| ENSG00000169313 | P2RY12 | -2.074185007 | 0.000562 |
| ENSG00000175591 | P2RY2  | 2.437438755  | 1.33E-10 |
| ENSG00000110811 | P3H3   | -1.126748513 | 0.003123 |
| ENSG00000149380 | P4HA3  | 1.561440615  | 0.000328 |
| ENSG00000178467 | P4HTM  | -1.209100288 | 4.67E-05 |
| ENSG00000174740 | PABPC5 | -2.114482671 | 0.0001   |
| ENSG00000142623 | PADI1  | 3.228532461  | 1.64E-14 |
| ENSG00000117115 | PADI2  | -2.693458209 | 4.93E-10 |
| ENSG00000077264 | PAK3   | -3.490485871 | 8E-12    |
| ENSG00000107719 | PALD1  | 1.370882747  | 1.85E-09 |
| ENSG00000099864 | PALM   | -2.534494595 | 5.94E-15 |
| ENSG00000149090 | PAMR1  | -2.756877438 | 7.02E-19 |
| ENSG00000110218 | PANX1  | 1.582584384  | 9.76E-08 |
| ENSG00000116183 | PAPPA2 | -2.408185824 | 4.87E-05 |
| ENSG00000137819 | PAQR5  | 2.026602656  | 6.75E-12 |



|                 |         |              |          |
|-----------------|---------|--------------|----------|
| ENSG00000182749 | PAQR7   | 1.278040801  | 4.1E-11  |
| ENSG00000116117 | PARD3B  | -1.674206176 | 3.45E-06 |
| ENSG00000178184 | PARD6G  | 1.321598134  | 4.83E-11 |
| ENSG00000169116 | PARM1   | -1.121036284 | 2.49E-06 |
| ENSG00000138496 | PARP9   | 1.340608255  | 1.57E-08 |
| ENSG00000185480 | PARPBP  | 1.272066126  | 4.63E-07 |
| ENSG00000229474 | PATL2   | -1.263894922 | 0.013529 |
| ENSG00000100105 | PATZ1   | -1.52707512  | 4.45E-12 |
| ENSG00000007372 | PAX6    | -1.70230738  | 0.033522 |
| ENSG00000125618 | PAX8    | 1.927928936  | 0.003066 |
| ENSG00000168078 | PBK     | 1.906123912  | 1.74E-07 |
| ENSG00000108187 | PBLD    | -1.05648394  | 7.92E-05 |
| ENSG00000163346 | PBXIP1  | -1.17429114  | 1.63E-09 |
| ENSG00000138650 | PCDH10  | -2.838742647 | 0.005558 |
| ENSG00000102290 | PCDH11X | -2.300336932 | 0.000706 |
| ENSG00000189184 | PCDH18  | -1.777706789 | 1.06E-08 |
| ENSG00000165194 | PCDH19  | -2.161358882 | 8.9E-05  |
| ENSG00000184226 | PCDH9   | -3.488591889 | 3.25E-14 |
| ENSG00000248383 | PCDHAC1 | -3.458509598 | 0.00112  |
| ENSG00000197479 | PCDHB11 | -1.376200852 | 0.004666 |
| ENSG00000272674 | PCDHB16 | -1.682885054 | 1.95E-09 |
| ENSG00000112852 | PCDHB2  | -1.397942125 | 9.79E-05 |
| ENSG00000113205 | PCDHB3  | -1.600383545 | 0.029778 |
| ENSG00000081818 | PCDHB4  | -1.819045863 | 1.41E-07 |
| ENSG00000113209 | PCDHB5  | -1.853719422 | 0.00438  |
| ENSG00000113211 | PCDHB6  | -1.612090425 | 0.00994  |
| ENSG00000113212 | PCDHB7  | -1.956837241 | 9.85E-10 |
| ENSG00000120322 | PCDHB8  | -2.981847469 | 0.033932 |
| ENSG00000177839 | PCDHB9  | -1.125273696 | 0.005092 |
| ENSG00000081853 | PCDHGA2 | -1.052465782 | 0.015963 |
| ENSG00000254245 | PCDHGA3 | -1.938131087 | 0.046957 |
| ENSG00000262576 | PCDHGA4 | -2.115049534 | 0.016679 |
| ENSG00000253485 | PCDHGA5 | -2.428426343 | 0.000448 |
| ENSG00000253537 | PCDHGA7 | -1.15381463  | 0.046085 |
| ENSG00000253910 | PCDHGB2 | -2.008668252 | 9.74E-06 |
| ENSG00000124253 | PCK1    | -4.355396237 | 1.46E-07 |
| ENSG00000166803 | PCLAF   | 1.004829915  | 0.01188  |
| ENSG00000186472 | PCLO    | -1.66621839  | 3.19E-07 |
| ENSG00000132646 | PCNA    | 1.086395108  | 1E-05    |
| ENSG00000163710 | PCOLCE2 | -2.863405928 | 3.08E-11 |
| ENSG00000174788 | PCP2    | -2.002380887 | 0.003376 |
| ENSG00000183036 | PCP4    | -3.045230685 | 3.38E-06 |
| ENSG00000175426 | PCSK1   | 4.680339507  | 1.21E-09 |
| ENSG00000102109 | PCSK1N  | -1.511999078 | 0.041093 |
| ENSG00000125851 | PCSK2   | -1.623721898 | 9.24E-06 |
| ENSG00000099139 | PCSK5   | -1.797010451 | 4.45E-08 |
| ENSG00000140479 | PCSK6   | 2.206386837  | 1.1E-09  |
| ENSG00000169174 | PCSK9   | 2.53075255   | 3E-20    |

|                 |          |              |          |
|-----------------|----------|--------------|----------|
| ENSG00000197646 | PDCD1LG2 | -1.075631324 | 0.012424 |
| ENSG00000163440 | PDCL2    | 2.759862996  | 0.00429  |
| ENSG00000115539 | PDCL3    | 1.017887219  | 3.55E-06 |
| ENSG00000128655 | PDE11A   | -3.193008943 | 1.75E-08 |
| ENSG00000115252 | PDE1A    | -1.15035831  | 0.034835 |
| ENSG00000123360 | PDE1B    | -1.584442037 | 3.69E-07 |
| ENSG00000154678 | PDE1C    | -1.70043705  | 0.004253 |
| ENSG00000186642 | PDE2A    | -1.729404593 | 1.59E-07 |
| ENSG00000172572 | PDE3A    | -1.095352798 | 0.00281  |
| ENSG00000152270 | PDE3B    | -2.823718026 | 1.51E-09 |
| ENSG00000065989 | PDE4A    | -1.407533322 | 1.26E-07 |
| ENSG00000178104 | PDE4DIP  | -1.124236587 | 2.21E-08 |
| ENSG00000138735 | PDE5A    | -1.784335899 | 3.06E-09 |
| ENSG00000132915 | PDE6A    | -3.608286877 | 0.005052 |
| ENSG00000113231 | PDE8B    | -2.417341141 | 2.65E-06 |
| ENSG00000160191 | PDE9A    | -2.668986122 | 8.61E-12 |
| ENSG00000100311 | PDGFB    | -1.397590756 | 2.4E-05  |
| ENSG00000170962 | PDGFD    | -2.67194848  | 7.45E-13 |
| ENSG00000134853 | PDGFRA   | -1.172911729 | 0.000733 |
| ENSG00000113721 | PDGFRB   | -1.011367622 | 0.016556 |
| ENSG00000104213 | PDGFRL   | -2.214725445 | 5.37E-10 |
| ENSG00000004799 | PDK4     | -2.770035436 | 1.98E-13 |
| ENSG00000154553 | PDLIM3   | -2.065372673 | 3.33E-10 |
| ENSG00000162493 | PDPN     | 1.170243297  | 0.001064 |
| ENSG00000148459 | PDSS1    | 1.129625186  | 6.78E-05 |
| ENSG00000172367 | PDZD3    | -2.418859676 | 0.001485 |
| ENSG00000067840 | PDZD4    | -1.347634753 | 9.08E-06 |
| ENSG00000162366 | PDZK1IP1 | 2.866974075  | 4.18E-14 |
| ENSG00000121440 | PDZRN3   | -1.887223105 | 6.07E-09 |
| ENSG00000165966 | PDZRN4   | -1.618844124 | 0.033358 |
| ENSG00000187800 | PEAR1    | -1.254885894 | 0.000227 |
| ENSG00000134020 | PEBP4    | -3.789051627 | 5.89E-08 |
| ENSG00000261371 | PECAM1   | -1.13003767  | 4.82E-05 |
| ENSG00000115425 | PECR     | -1.97665633  | 3.14E-12 |
| ENSG00000242265 | PEG10    | -2.199499464 | 2.95E-13 |
| ENSG00000198300 | PEG3     | -2.293295282 | 1.3E-09  |
| ENSG00000139946 | PELI2    | -1.837127945 | 1.74E-07 |
| ENSG00000179094 | PER1     | -1.275735284 | 7.22E-07 |
| ENSG00000049246 | PER3     | -1.007273807 | 0.001244 |
| ENSG00000187642 | PERM1    | -1.984023507 | 2.9E-05  |
| ENSG00000112378 | PERP     | 2.081256429  | 2.08E-13 |
| ENSG00000166821 | PEX11A   | -1.478616364 | 6.48E-12 |
| ENSG00000163737 | PF4      | -2.737201258 | 0.010921 |
| ENSG00000158571 | PFKFB1   | -2.188253303 | 0.000381 |
| ENSG00000123836 | PFKFB2   | 1.633981622  | 1.17E-09 |
| ENSG00000114268 | PFKFB4   | 1.548512246  | 2.33E-06 |
| ENSG00000108518 | PFN1     | 1.231675144  | 5.11E-07 |
| ENSG00000171314 | PGAM1    | 1.573103019  | 2.74E-06 |

|                 |         |              |          |
|-----------------|---------|--------------|----------|
| ENSG00000164708 | PGAM2   | -3.775663882 | 6.47E-05 |
| ENSG00000247077 | PGAM5   | 1.324819952  | 3.29E-10 |
| ENSG00000177614 | PGBD5   | 2.57950613   | 9.82E-10 |
| ENSG00000119630 | PGF     | 2.164134042  | 1.24E-14 |
| ENSG00000102144 | PGK1    | 1.022092722  | 0.000313 |
| ENSG00000161031 | PGLYRP2 | 4.326837741  | 2.11E-05 |
| ENSG00000159527 | PGLYRP3 | 1.842415622  | 8.49E-11 |
| ENSG00000163218 | PGLYRP4 | 1.673058772  | 1.11E-06 |
| ENSG00000169299 | PGM2    | 2.481624674  | 1.01E-17 |
| ENSG00000154330 | PGM5    | -2.637781462 | 2.09E-18 |
| ENSG00000130517 | PGPEP1  | -1.636394601 | 4.57E-07 |
| ENSG00000082175 | PGR     | -2.79713538  | 5.85E-12 |
| ENSG00000087495 | PHACTR3 | -2.72220896  | 1.26E-05 |
| ENSG00000198324 | PHETA1  | 1.434943517  | 7.13E-09 |
| ENSG00000102174 | PHEX    | 1.886299631  | 3.79E-05 |
| ENSG00000112511 | PHF1    | -1.298671585 | 4.29E-09 |
| ENSG00000118482 | PHF3    | -1.081921022 | 0.000133 |
| ENSG00000092621 | PHGDH   | 1.02530961   | 3.38E-07 |
| ENSG00000164776 | PHKG1   | -2.307481556 | 7.57E-09 |
| ENSG00000181649 | PHLDA2  | 2.388640679  | 1.8E-07  |
| ENSG00000019144 | PHLDB1  | -1.78622808  | 9.06E-10 |
| ENSG00000107537 | PHYH    | -1.242407173 | 8.5E-11  |
| ENSG00000175287 | PHYHD1  | -1.086425073 | 9.69E-06 |
| ENSG00000168490 | PHYHIP  | -3.521523664 | 3.24E-24 |
| ENSG00000165443 | PHYHIPL | -2.948092336 | 6.71E-05 |
| ENSG00000164530 | PI16    | -2.351270799 | 2.16E-07 |
| ENSG00000124102 | PI3     | 9.77801952   | 1.28E-32 |
| ENSG00000153823 | PID1    | -1.390109027 | 5.37E-11 |
| ENSG00000154864 | PIEZO2  | -2.73899362  | 1.28E-10 |
| ENSG00000140451 | PIF1    | 1.268688911  | 0.000982 |
| ENSG00000173947 | PIFO    | -2.549378161 | 5.22E-13 |
| ENSG00000165195 | PIGA    | 1.112130736  | 2.53E-07 |
| ENSG00000155629 | PIK3AP1 | -1.250491884 | 0.000856 |
| ENSG00000171608 | PIK3CD  | 1.27336202   | 6.65E-06 |
| ENSG00000145675 | PIK3R1  | -1.433109169 | 1.02E-09 |
| ENSG00000117461 | PIK3R3  | -1.134173215 | 3.4E-06  |
| ENSG00000276231 | PIK3R6  | -1.539443136 | 0.000865 |
| ENSG00000137193 | PIM1    | 2.221997854  | 1.79E-15 |
| ENSG00000159763 | PIP     | -5.88913832  | 4.67E-14 |
| ENSG00000107242 | PIP5K1B | -2.647332007 | 1.76E-12 |
| ENSG00000167103 | PIP5KL1 | 1.72314155   | 4.24E-10 |
| ENSG00000179761 | PIPOX   | -1.870784647 | 0.003683 |
| ENSG00000174238 | PITPNA  | 1.029881159  | 2.9E-06  |
| ENSG00000069011 | PITX1   | 3.330793033  | 5.31E-13 |
| ENSG00000197181 | PIWIL2  | -2.38209282  | 0.00072  |
| ENSG00000008710 | PKD1    | -1.176877066 | 1.15E-05 |
| ENSG00000166473 | PKD1L2  | -2.531451534 | 6.45E-07 |
| ENSG00000277481 | PKD1L3  | -2.280205664 | 0.004504 |

|                 |         |              |          |
|-----------------|---------|--------------|----------|
| ENSG00000162878 | PKDCC   | -2.249336151 | 5.04E-06 |
| ENSG00000170927 | PKHD1   | -2.632512961 | 1.65E-07 |
| ENSG00000205038 | PKHD1L1 | -1.880242689 | 0.005573 |
| ENSG00000135549 | PKIB    | -1.115448598 | 0.000482 |
| ENSG00000067225 | PKM     | 1.371921415  | 3.69E-07 |
| ENSG00000127564 | PKMYT1  | 2.036643906  | 0.000486 |
| ENSG00000123143 | PKN1    | -1.484753155 | 1.78E-07 |
| ENSG00000081277 | PKP1    | 2.201874889  | 1.82E-13 |
| ENSG00000184363 | PKP3    | 2.138996797  | 2.25E-18 |
| ENSG00000176485 | PLA2G16 | -3.022484786 | 5.74E-14 |
| ENSG00000188257 | PLA2G2A | -1.611886927 | 0.028346 |
| ENSG00000158786 | PLA2G2F | 2.681611741  | 1.94E-12 |
| ENSG00000100078 | PLA2G3  | 2.617499067  | 2.09E-16 |
| ENSG00000105499 | PLA2G4C | -1.713233091 | 1.16E-06 |
| ENSG00000159337 | PLA2G4D | 4.843133049  | 1.55E-39 |
| ENSG00000188089 | PLA2G4E | 1.952052429  | 7.21E-18 |
| ENSG00000127472 | PLA2G5  | -1.932081509 | 0.001064 |
| ENSG00000153246 | PLA2R1  | -1.512961161 | 2.08E-12 |
| ENSG00000170965 | PLAC1   | 3.074819921  | 0.000942 |
| ENSG00000189129 | PLAC9   | -2.405978013 | 5.32E-11 |
| ENSG00000104368 | PLAT    | -1.814147008 | 5.71E-14 |
| ENSG00000122861 | PLAU    | 2.032642417  | 1.59E-13 |
| ENSG00000011422 | PLAUR   | 1.305386016  | 0.00687  |
| ENSG00000121316 | PLBD1   | 2.426110984  | 5.2E-18  |
| ENSG00000182621 | PLCB1   | -1.697861064 | 1.88E-07 |
| ENSG00000149782 | PLCB3   | 1.401102385  | 5.35E-09 |
| ENSG00000101333 | PLCB4   | -2.975918562 | 1.69E-14 |
| ENSG00000187091 | PLCD1   | 1.129620501  | 2.5E-05  |
| ENSG00000115556 | PLCD4   | 1.723099507  | 1.38E-10 |
| ENSG00000138193 | PLCE1   | -2.798602809 | 4.53E-13 |
| ENSG00000114805 | PLCH1   | -1.914890526 | 0.00016  |
| ENSG00000115896 | PLCL1   | -1.734639331 | 8.37E-07 |
| ENSG00000154822 | PLCL2   | -2.045278583 | 1.53E-07 |
| ENSG00000182378 | PLCXD1  | 2.032341543  | 4.05E-14 |
| ENSG00000240891 | PLCXD2  | 1.8131105    | 0.015608 |
| ENSG00000182836 | PLCXD3  | -2.813275762 | 9.07E-08 |
| ENSG00000129219 | PLD2    | 1.084916686  | 1.43E-07 |
| ENSG00000180287 | PLD5    | -2.81714001  | 0.004052 |
| ENSG00000179598 | PLD6    | -1.584138187 | 6.98E-06 |
| ENSG00000100558 | PLEK2   | 1.727396794  | 3.87E-08 |
| ENSG00000105559 | PLEKHA4 | -1.016007102 | 0.000595 |
| ENSG00000143850 | PLEKHA6 | -2.851518988 | 1.31E-11 |
| ENSG00000021300 | PLEKHB1 | -3.002573045 | 1.24E-11 |
| ENSG00000175985 | PLEKHD1 | -2.319506007 | 1.69E-05 |
| ENSG00000054690 | PLEKHH1 | -1.294230862 | 1.92E-05 |
| ENSG00000152527 | PLEKHH2 | -1.232341743 | 3.78E-05 |
| ENSG00000116786 | PLEKHM2 | 1.000365035  | 1.93E-05 |
| ENSG00000148735 | PLEKHS1 | -1.343213364 | 0.02848  |

|                 |         |              |          |
|-----------------|---------|--------------|----------|
| ENSG00000166819 | PLIN1   | -5.016102457 | 1.65E-11 |
| ENSG00000105355 | PLIN3   | 1.511657024  | 5.36E-11 |
| ENSG00000167676 | PLIN4   | -4.302282885 | 4.21E-09 |
| ENSG00000214456 | PLIN5   | -1.662722135 | 0.000482 |
| ENSG00000166851 | PLK1    | 1.913403277  | 2.34E-08 |
| ENSG00000145632 | PLK2    | 1.039221122  | 2.46E-05 |
| ENSG00000173846 | PLK3    | 1.28121885   | 1.26E-07 |
| ENSG00000142731 | PLK4    | 1.050455472  | 6.11E-06 |
| ENSG00000102934 | PLLP    | -1.002204648 | 0.001509 |
| ENSG00000198523 | PLN     | -2.468849342 | 3.03E-11 |
| ENSG00000123560 | PLP1    | -1.251437938 | 0.000467 |
| ENSG00000102007 | PLP2    | 1.360074194  | 5.06E-10 |
| ENSG00000067113 | PLPP1   | -1.044021322 | 1.61E-06 |
| ENSG00000162407 | PLPP3   | -1.676220576 | 3.4E-08  |
| ENSG00000160539 | PLPP7   | -2.085948856 | 2.31E-05 |
| ENSG00000148123 | PLPPR1  | -3.469685908 | 0.002385 |
| ENSG00000114698 | PLSCR4  | -1.671802235 | 6.89E-09 |
| ENSG00000130827 | PLXNA3  | -1.315088882 | 0.000138 |
| ENSG00000221866 | PLXNA4  | -2.421072294 | 2.24E-15 |
| ENSG00000004399 | PLXND1  | -1.107665127 | 0.001154 |
| ENSG00000185664 | PMEL    | 1.663055947  | 4.38E-07 |
| ENSG00000147588 | PMP2    | -2.264935853 | 4.36E-05 |
| ENSG00000109099 | PMP22   | -1.162919997 | 4.43E-08 |
| ENSG00000130822 | PNCK    | -2.866288716 | 2.29E-08 |
| ENSG00000132424 | PNISR   | -1.179531479 | 0.000536 |
| ENSG00000204851 | PNMA8B  | -1.79296122  | 1.04E-07 |
| ENSG00000141744 | PNMT    | -3.611310979 | 0.001064 |
| ENSG00000198805 | PNP     | 2.219544743  | 1.95E-11 |
| ENSG00000180316 | PNPLA1  | 2.467831622  | 3.62E-14 |
| ENSG00000177666 | PNPLA2  | -1.346482989 | 6.37E-05 |
| ENSG00000130653 | PNPLA7  | -1.559258945 | 0.000207 |
| ENSG00000164087 | POC1A   | 1.892229349  | 5.47E-07 |
| ENSG00000174348 | PODN    | -2.287512924 | 6.45E-10 |
| ENSG00000132000 | PODNL1  | 1.701238188  | 1.56E-05 |
| ENSG00000114631 | PODXL2  | -1.100966044 | 5.18E-07 |
| ENSG00000124429 | POF1B   | 2.536768648  | 2.17E-16 |
| ENSG00000070501 | POLB    | 1.171620428  | 4.3E-05  |
| ENSG00000100479 | POLE2   | 1.444914991  | 1.58E-07 |
| ENSG00000051341 | POLQ    | 1.007791811  | 0.001022 |
| ENSG00000168255 | POLR2J3 | 1.182248137  | 0.002486 |
| ENSG00000285437 | POLR2J3 | -1.19556836  | 0.006563 |
| ENSG00000177700 | POLR2L  | 1.022780225  | 0.000132 |
| ENSG00000013503 | POLR3B  | 1.094390877  | 1.82E-07 |
| ENSG00000113356 | POLR3G  | 2.632101386  | 4.14E-15 |
| ENSG00000121851 | POLR3GL | -1.052205504 | 3.83E-05 |
| ENSG00000132963 | POMP    | 1.00944302   | 1.22E-05 |
| ENSG00000105852 | PON3    | -1.010412467 | 0.033522 |
| ENSG00000172336 | POP7    | 1.056672565  | 8.35E-07 |

|                 |          |              |          |
|-----------------|----------|--------------|----------|
| ENSG00000121577 | POPDC2   | -1.705695033 | 2.85E-08 |
| ENSG00000133110 | POSTN    | -1.004571748 | 0.000314 |
| ENSG00000028277 | POU2F2   | -1.449830897 | 5.21E-06 |
| ENSG00000198914 | POU3F3   | -3.242456209 | 1.61E-06 |
| ENSG00000152192 | POU4F1   | 2.14928121   | 0.027618 |
| ENSG00000212993 | POU5F1B  | -1.484896039 | 9.46E-05 |
| ENSG00000184271 | POU6F1   | -1.837751979 | 8.47E-11 |
| ENSG00000112033 | PPARD    | 1.599118439  | 4.86E-10 |
| ENSG00000132170 | PPARG    | -1.674826983 | 2.91E-06 |
| ENSG00000109819 | PPARGC1A | -2.955395422 | 3.61E-12 |
| ENSG00000163736 | PPBP     | -1.829071631 | 0.030581 |
| ENSG00000168333 | PPDPFL   | -3.464772493 | 0.002976 |
| ENSG00000139220 | PPFIA2   | -1.65006834  | 0.000408 |
| ENSG00000196262 | PPIA     | 1.051312255  | 7.12E-08 |
| ENSG00000108179 | PPIF     | 1.945692239  | 4.51E-08 |
| ENSG00000137168 | PPIL1    | 1.226926226  | 4.07E-05 |
| ENSG00000118898 | PPL      | 1.001084768  | 2.96E-05 |
| ENSG00000111110 | PPM1H    | -1.622692439 | 1.2E-07  |
| ENSG00000163644 | PPM1K    | -1.663749752 | 1.6E-06  |
| ENSG00000164088 | PPM1M    | -1.10261197  | 5.03E-07 |
| ENSG00000172531 | PPP1CA   | 1.291784758  | 5.17E-08 |
| ENSG00000077157 | PPP1R12B | -1.650432399 | 6.8E-11  |
| ENSG00000167641 | PPP1R14A | -2.528661663 | 4.01E-13 |
| ENSG00000198729 | PPP1R14C | 1.84400277   | 3.72E-14 |
| ENSG00000101445 | PPP1R16B | -1.699749717 | 8.38E-10 |
| ENSG00000135447 | PPP1R1A  | -4.28334378  | 1.11E-10 |
| ENSG00000131771 | PPP1R1B  | -3.391911497 | 1.18E-15 |
| ENSG00000231989 | PPP1R2B  | 2.907412846  | 0.028891 |
| ENSG00000162148 | PPP1R32  | -1.289026815 | 0.002358 |
| ENSG00000219607 | PPP1R3G  | -2.1774013   | 1.5E-09  |
| ENSG00000158528 | PPP1R9A  | -3.029079106 | 3.17E-12 |
| ENSG00000113575 | PPP2CA   | 1.027141041  | 1.85E-05 |
| ENSG00000074211 | PPP2R2C  | 1.929291283  | 3.66E-22 |
| ENSG00000073711 | PPP2R3A  | 1.134320273  | 1.07E-07 |
| ENSG00000149923 | PPP4C    | 1.165213209  | 6.78E-08 |
| ENSG00000154845 | PPP4R1   | 1.663264643  | 1.39E-10 |
| ENSG00000230510 | PPP5D1   | -1.766058367 | 3.52E-06 |
| ENSG00000221988 | PPT2     | 1.084832402  | 4.53E-05 |
| ENSG00000174899 | PQLC2L   | -2.379342667 | 1.56E-05 |
| ENSG00000275342 | PRAG1    | 1.569582324  | 4.54E-06 |
| ENSG00000133246 | PRAM1    | -1.988799005 | 0.000299 |
| ENSG00000251655 | PRB1     | -4.188561723 | 1.28E-05 |
| ENSG00000121335 | PRB2     | -4.610513319 | 1.46E-11 |
| ENSG00000197870 | PRB3     | -2.499195067 | 0.011365 |
| ENSG00000214140 | PRCD     | -2.061451081 | 0.001498 |
| ENSG00000057657 | PRDM1    | 2.497689201  | 3.76E-31 |
| ENSG00000142611 | PRDM16   | -1.817380586 | 0.020155 |
| ENSG00000126856 | PRDM7    | 5.370020609  | 8.53E-05 |

|                 |          |              |          |
|-----------------|----------|--------------|----------|
| ENSG00000152784 | PRDM8    | -2.039978698 | 0.000223 |
| ENSG00000117450 | PRDX1    | 1.049830082  | 3.39E-07 |
| ENSG00000169230 | PRELID1  | 1.667808118  | 7.9E-08  |
| ENSG00000101166 | PRELID3B | 1.208361279  | 1.49E-05 |
| ENSG00000188783 | PRELP    | -2.651659104 | 6.8E-13  |
| ENSG00000085377 | PREP     | 1.037036777  | 1.62E-06 |
| ENSG00000046889 | PREX2    | -1.204813656 | 0.000236 |
| ENSG00000116690 | PRG4     | -1.648218739 | 0.021802 |
| ENSG00000231887 | PRH1     | -1.215625729 | 0.007978 |
| ENSG00000139174 | PRICKLE1 | -1.234835469 | 7.82E-08 |
| ENSG00000175785 | PRIMA1   | -1.658579963 | 1.61E-08 |
| ENSG00000162409 | PRKAA2   | -2.714298587 | 5.7E-13  |
| ENSG00000142875 | PRKACB   | -1.00758913  | 5.74E-05 |
| ENSG00000106617 | PRKAG2   | -1.003325805 | 5.39E-08 |
| ENSG00000005249 | PRKAR2B  | -3.028351958 | 2.23E-17 |
| ENSG00000166501 | PRKCB    | -1.562297353 | 8.65E-17 |
| ENSG00000065675 | PRKCQ    | 4.106535957  | 1.14E-14 |
| ENSG00000184304 | PRKD1    | -2.010101853 | 2.67E-09 |
| ENSG00000185532 | PRKG1    | -1.719242375 | 7.22E-07 |
| ENSG00000138669 | PRKG2    | -1.810608943 | 5.39E-06 |
| ENSG00000185345 | PRKN     | -1.814452437 | 1.94E-09 |
| ENSG00000185238 | PRMT3    | 1.159988473  | 1.31E-06 |
| ENSG00000111218 | PRMT8    | 3.296761327  | 0.03545  |
| ENSG00000228672 | PROB1    | 2.43291836   | 1.14E-08 |
| ENSG00000115718 | PROC     | 3.372765524  | 8.36E-05 |
| ENSG00000167525 | PROCA1   | -1.618639638 | 2.14E-05 |
| ENSG00000101000 | PROCR    | 1.136638144  | 9.18E-07 |
| ENSG00000007062 | PROM1    | -1.537485435 | 0.002189 |
| ENSG00000155066 | PROM2    | 1.409805046  | 3.58E-09 |
| ENSG00000135406 | PRPH     | -2.464788768 | 1.89E-05 |
| ENSG00000068489 | PRR11    | 1.728265948  | 1.07E-09 |
| ENSG00000167183 | PRR15L   | -3.046560148 | 2.01E-09 |
| ENSG00000180525 | PRR26    | -1.876002826 | 0.007197 |
| ENSG00000183248 | PRR36    | -1.092237657 | 0.037651 |
| ENSG00000203783 | PRR9     | 5.331278072  | 2.58E-09 |
| ENSG00000130032 | PRRG3    | -2.419463444 | 1.98E-08 |
| ENSG00000135378 | PRRG4    | 1.534685818  | 6.11E-14 |
| ENSG00000204314 | PRRT1    | -1.210999508 | 0.012714 |
| ENSG00000167371 | PRRT2    | -2.130138812 | 0.000275 |
| ENSG00000116132 | PRRX1    | -1.125325541 | 0.002648 |
| ENSG00000005001 | PRSS22   | 1.903575343  | 1.44E-05 |
| ENSG00000172382 | PRSS27   | 2.828972183  | 4.56E-20 |
| ENSG00000010438 | PRSS3    | 3.868241965  | 1.34E-23 |
| ENSG00000178226 | PRSS36   | 1.035045821  | 0.002227 |
| ENSG00000151006 | PRSS53   | 1.646758941  | 0.02834  |
| ENSG00000052344 | PRSS8    | 1.834945364  | 3.36E-10 |
| ENSG00000106772 | PRUNE2   | -2.516286607 | 4.11E-12 |
| ENSG00000105227 | PRX      | -1.638370942 | 1.4E-07  |



|                 |          |              |          |
|-----------------|----------|--------------|----------|
| ENSG00000178597 | PSAPL1   | 1.534169494  | 0.031372 |
| ENSG00000135069 | PSAT1    | 1.134525572  | 2.88E-11 |
| ENSG00000125637 | PSD4     | 1.012660183  | 7.21E-05 |
| ENSG00000205155 | PSEENEN  | 1.03931561   | 5.57E-06 |
| ENSG00000164985 | PSIP1    | -1.124106945 | 0.000105 |
| ENSG00000143106 | PSMA5    | 1.258040506  | 5.02E-06 |
| ENSG00000126067 | PSMB2    | 1.028021132  | 1.44E-08 |
| ENSG00000100804 | PSMB5    | 1.217958433  | 1.89E-06 |
| ENSG00000142507 | PSMB6    | 1.268420865  | 1.58E-06 |
| ENSG00000165916 | PSMC3    | 1.09271611   | 3.19E-07 |
| ENSG00000013275 | PSMC4    | 1.170290817  | 1.3E-10  |
| ENSG00000115233 | PSMD14   | 1.098733428  | 1.32E-06 |
| ENSG00000175166 | PSMD2    | 1.021743511  | 3.34E-07 |
| ENSG00000131467 | PSME3    | 1.209213665  | 4.59E-06 |
| ENSG00000183527 | PSMG1    | 1.098438606  | 6.75E-10 |
| ENSG00000204538 | PSORS1C2 | 2.926608442  | 0.000122 |
| ENSG00000146733 | PSPH     | 1.499410354  | 3.08E-09 |
| ENSG00000140368 | PSTPIP1  | 1.002809083  | 0.044611 |
| ENSG00000169403 | PTAFR    | 1.42540206   | 1.44E-06 |
| ENSG00000119314 | PTBP3    | 1.15351704   | 7.88E-07 |
| ENSG00000185920 | PTCH1    | -1.477141342 | 1.78E-06 |
| ENSG00000117425 | PTCH2    | -1.857075958 | 3.65E-05 |
| ENSG00000165186 | PTCHD1   | -4.150165912 | 1.58E-09 |
| ENSG00000244694 | PTCHD4   | 2.031657182  | 0.024243 |
| ENSG00000168229 | PTGDR    | -3.043533279 | 0.000549 |
| ENSG00000125384 | PTGER2   | -1.555673964 | 0.001086 |
| ENSG00000148344 | PTGES    | 1.078535626  | 1.37E-05 |
| ENSG00000122420 | PTGFR    | -2.21336292  | 6.29E-10 |
| ENSG00000134247 | PTGFRN   | 1.176672052  | 2.38E-07 |
| ENSG00000124212 | PTGIS    | -2.0709814   | 7.56E-08 |
| ENSG00000095303 | PTGS1    | 1.677937332  | 7.44E-13 |
| ENSG00000073756 | PTGS2    | 2.950925835  | 3.95E-06 |
| ENSG00000160801 | PTH1R    | -2.438434884 | 5.51E-10 |
| ENSG00000087494 | PTHLH    | 3.426185163  | 4.67E-08 |
| ENSG00000101213 | PTK6     | 1.276508601  | 1.76E-12 |
| ENSG00000105894 | PTN      | -1.146687181 | 0.000721 |
| ENSG00000112245 | PTP4A1   | 1.35610958   | 1.73E-08 |
| ENSG00000184489 | PTP4A3   | -1.403867912 | 2.52E-06 |
| ENSG00000127329 | PTPRB    | -1.13506647  | 0.000261 |
| ENSG00000149177 | PTPRJ    | -1.154120687 | 0.000124 |
| ENSG00000173482 | PTPRM    | -1.570046699 | 3.82E-09 |
| ENSG00000139304 | PTPRQ    | -3.799171619 | 3.97E-06 |
| ENSG00000105426 | PTPRS    | -1.436693962 | 4.57E-07 |
| ENSG00000196090 | PTPRT    | -2.55136385  | 1.02E-07 |
| ENSG00000060656 | PTPRU    | -1.392493708 | 2.4E-08  |
| ENSG00000106278 | PTPRZ1   | 1.174308303  | 7.88E-11 |
| ENSG00000150787 | PTS      | 1.109733684  | 9.48E-06 |
| ENSG00000164611 | PTTG1    | 1.9856269    | 1.06E-11 |



|                 |         |              |          |
|-----------------|---------|--------------|----------|
| ENSG00000130021 | PUDP    | 1.262196632  | 7.04E-07 |
| ENSG00000169972 | PUSL1   | 1.387401501  | 3.09E-05 |
| ENSG00000147485 | PXDNL   | 1.769925177  | 0.01222  |
| ENSG00000103490 | PYCARD  | 2.028430288  | 2.03E-17 |
| ENSG00000183010 | PYCR1   | 1.103213263  | 3.44E-06 |
| ENSG00000169900 | PYDC1   | 5.12309436   | 6.66E-10 |
| ENSG00000068976 | PYGM    | -2.638305282 | 8.42E-17 |
| ENSG00000163564 | PYHIN1  | -1.5634485   | 0.025202 |
| ENSG00000119943 | PYROXD2 | -2.580066817 | 1.59E-07 |
| ENSG00000186867 | QRFPR   | 5.395710656  | 2.06E-09 |
| ENSG00000129646 | QRICH2  | -1.012341185 | 0.004178 |
| ENSG00000116260 | QSOX1   | 1.226410325  | 1.67E-06 |
| ENSG00000198858 | R3HDM4  | 1.036548523  | 1.07E-06 |
| ENSG00000084733 | RAB10   | 1.509736025  | 4.6E-08  |
| ENSG00000103769 | RAB11A  | 1.043884811  | 9.85E-06 |
| ENSG00000169228 | RAB24   | 1.607445149  | 8.55E-05 |
| ENSG00000132698 | RAB25   | 2.202225834  | 4.11E-15 |
| ENSG00000167964 | RAB26   | -1.935471431 | 0.000106 |
| ENSG00000041353 | RAB27B  | 1.347435943  | 1.2E-06  |
| ENSG00000168461 | RAB31   | 1.78152154   | 3.84E-15 |
| ENSG00000123892 | RAB38   | 2.153805891  | 2.26E-10 |
| ENSG00000105649 | RAB3A   | -1.123908637 | 0.000668 |
| ENSG00000169213 | RAB3B   | -2.287964513 | 3.03E-13 |
| ENSG00000152932 | RAB3C   | -1.780140778 | 0.000152 |
| ENSG00000105514 | RAB3D   | 1.542319508  | 3.18E-12 |
| ENSG00000167994 | RAB3IL1 | -2.017340327 | 2.09E-07 |
| ENSG00000147127 | RAB41   | -2.760906277 | 0.033077 |
| ENSG00000144566 | RAB5A   | 1.001643566  | 0.000237 |
| ENSG00000154917 | RAB6B   | -1.408944972 | 2.64E-07 |
| ENSG00000123570 | RAB9B   | -1.890925962 | 7.79E-05 |
| ENSG00000154710 | RABGEF1 | 1.408479118  | 3.51E-10 |
| ENSG00000183155 | RABIF   | 1.430174895  | 3.29E-07 |
| ENSG00000144134 | RABL2A  | -1.186087943 | 0.000284 |
| ENSG00000161800 | RACGAP1 | 1.39606925   | 3.58E-08 |
| ENSG00000085999 | RAD54L  | 1.356885271  | 1.32E-05 |
| ENSG00000151164 | RAD9B   | 2.069095233  | 0.020456 |
| ENSG00000157927 | RADIL   | -2.207572259 | 7.5E-08  |
| ENSG00000101146 | RAE1    | 1.093565706  | 1.88E-06 |
| ENSG00000164520 | RAET1E  | 2.43578723   | 1.11E-24 |
| ENSG00000203722 | RAET1G  | 3.285806816  | 5.93E-20 |
| ENSG00000155918 | RAET1L  | 2.948487616  | 4.02E-07 |
| ENSG00000039560 | RAI14   | -1.14246376  | 0.000103 |
| ENSG00000131831 | RAI2    | -2.571826141 | 1.2E-18  |
| ENSG00000116191 | RALGPS2 | 1.809816355  | 2.87E-19 |
| ENSG00000131477 | RAMP2   | -1.199192554 | 6.26E-05 |
| ENSG00000132341 | RAN     | 1.608086439  | 6.68E-09 |
| ENSG00000204764 | RANBP17 | -1.906676771 | 1.37E-05 |
| ENSG00000164188 | RANBP3L | -3.862137025 | 5.51E-13 |

|                 |          |              |          |
|-----------------|----------|--------------|----------|
| ENSG00000100401 | RANGAP1  | 1.058108519  | 7.26E-10 |
| ENSG00000181467 | RAP2B    | 1.411856467  | 2.2E-11  |
| ENSG00000079337 | RAPGEF3  | -1.648535226 | 2.58E-06 |
| ENSG00000077092 | RARB     | -2.401518168 | 5.29E-11 |
| ENSG00000106538 | RARRES2  | -2.51739701  | 5.59E-14 |
| ENSG00000133321 | RARRES3  | -1.069891613 | 0.000161 |
| ENSG00000185989 | RASA3    | -1.481263793 | 1.14E-05 |
| ENSG00000108551 | RASD1    | -1.746386482 | 1.94E-09 |
| ENSG00000100302 | RASD2    | -2.32657302  | 6.08E-09 |
| ENSG00000198915 | RASGEF1A | -1.2579572   | 0.003378 |
| ENSG00000146090 | RASGEF1C | -1.940330856 | 0.001631 |
| ENSG00000113319 | RASGRF2  | -1.384772749 | 9.12E-05 |
| ENSG00000172575 | RASGRP1  | 1.746769644  | 1.4E-11  |
| ENSG00000103710 | RASL12   | -1.839608098 | 9.91E-10 |
| ENSG00000107551 | RASSF4   | -1.518632538 | 7.98E-06 |
| ENSG00000169435 | RASSF6   | -1.295230911 | 1.34E-07 |
| ENSG00000123094 | RASSF8   | -1.045550292 | 4.73E-05 |
| ENSG00000185272 | RBM11    | -2.361310254 | 0.000583 |
| ENSG00000203867 | RBM20    | -2.167734125 | 1.17E-07 |
| ENSG00000112183 | RBM24    | -1.862496403 | 4.49E-06 |
| ENSG00000144642 | RBMS3    | -2.170073525 | 1.67E-12 |
| ENSG00000114115 | RBP1     | 1.630113299  | 1.28E-06 |
| ENSG00000138207 | RBP4     | -5.116316045 | 1.25E-09 |
| ENSG00000139194 | RBP5     | -1.487541262 | 0.004214 |
| ENSG00000162444 | RBP7     | -1.007896194 | 0.000697 |
| ENSG00000157110 | RBPMS    | -1.645384744 | 1.16E-14 |
| ENSG00000166831 | RBPMS2   | -2.330835095 | 2.18E-13 |
| ENSG00000159200 | RCAN1    | 1.37392489   | 2.77E-07 |
| ENSG00000172348 | RCAN2    | -2.512625871 | 1.68E-15 |
| ENSG00000180198 | RCC1     | 1.353296959  | 5.86E-07 |
| ENSG00000198771 | RCSD1    | -1.434652673 | 0.000305 |
| ENSG00000139988 | RDH12    | 3.158850789  | 1.93E-20 |
| ENSG00000139547 | RDH16    | 3.224272708  | 4.2E-22  |
| ENSG00000135437 | RDH5     | -1.979879727 | 1.14E-05 |
| ENSG00000122707 | RECK     | -1.78721005  | 1E-08    |
| ENSG00000250673 | REELD1   | -2.74007539  | 0.001523 |
| ENSG00000132563 | REEP2    | -2.016533788 | 2.5E-06  |
| ENSG00000164620 | RELL2    | 2.02275423   | 2.96E-07 |
| ENSG00000189056 | RELN     | -3.335621145 | 1.02E-12 |
| ENSG00000054967 | RELT     | 1.628925464  | 7.73E-10 |
| ENSG00000088320 | REM1     | -1.791582159 | 2.76E-06 |
| ENSG00000143839 | REN      | 6.545737514  | 1.74E-10 |
| ENSG00000102032 | RENBP    | -1.593327189 | 9.84E-08 |
| ENSG00000169891 | REPS2    | -1.107270799 | 0.002867 |
| ENSG00000134533 | RERG     | -1.583896772 | 7.53E-07 |
| ENSG00000111404 | RERGL    | -2.978713971 | 3.19E-15 |
| ENSG00000154153 | RETREG1  | -1.798348234 | 2.66E-09 |
| ENSG00000162944 | RFTN2    | -1.028907017 | 0.003508 |

|                 |         |              |          |
|-----------------|---------|--------------|----------|
| ENSG00000087903 | RFX2    | -1.073469095 | 2.84E-05 |
| ENSG00000102760 | RGCC    | -1.664385311 | 4.24E-10 |
| ENSG00000205517 | RGL3    | -2.567264949 | 2.69E-05 |
| ENSG00000182175 | RGMA    | -1.540753232 | 4.28E-12 |
| ENSG00000130988 | RGN     | -2.438937319 | 1.61E-08 |
| ENSG00000090104 | RGS1    | 2.048497854  | 0.011373 |
| ENSG00000127074 | RGS13   | -2.647488148 | 6.73E-06 |
| ENSG00000169220 | RGS14   | 1.387716501  | 2.54E-08 |
| ENSG00000147509 | RGS20   | 4.918892864  | 2.43E-26 |
| ENSG00000132554 | RGS22   | -2.770394671 | 1.23E-05 |
| ENSG00000143248 | RGS5    | -1.094106968 | 0.000183 |
| ENSG00000182732 | RGS6    | -4.043159335 | 6.23E-13 |
| ENSG00000186479 | RGS7BP  | -2.886505099 | 1.03E-07 |
| ENSG00000108370 | RGS9    | -2.394982133 | 1.36E-17 |
| ENSG00000158315 | RHBDL2  | 1.073762685  | 3.54E-07 |
| ENSG00000132677 | RHBG    | 1.440214787  | 0.000829 |
| ENSG00000140519 | RHCG    | 1.827870382  | 0.002736 |
| ENSG00000263961 | RHEX    | -1.996378843 | 0.001236 |
| ENSG00000164292 | RHOBTB3 | -1.598484453 | 1.09E-07 |
| ENSG00000173156 | RHOD    | 2.534154852  | 1.65E-17 |
| ENSG00000139725 | RHOF    | 1.344028771  | 0.012469 |
| ENSG00000177105 | RHOG    | 1.053379789  | 0.000152 |
| ENSG00000116574 | RHOU    | -1.523376197 | 1.02E-10 |
| ENSG00000101883 | RHOXF1  | -3.346976535 | 2.09E-05 |
| ENSG00000158106 | RHPN1   | -1.373577702 | 0.001064 |
| ENSG00000131941 | RHPN2   | -3.043127342 | 6.48E-12 |
| ENSG00000166405 | RIC3    | -1.019092839 | 0.005634 |
| ENSG00000177181 | RIMKLA  | -1.293077104 | 0.000111 |
| ENSG00000079841 | RIMS1   | -4.276427171 | 4.85E-09 |
| ENSG00000117016 | RIMS3   | 1.91781911   | 1.9E-07  |
| ENSG00000101098 | RIMS4   | -2.569592389 | 0.022645 |
| ENSG00000132669 | RIN2    | 1.001148069  | 1.44E-06 |
| ENSG00000111913 | RIPOR2  | -1.155515704 | 0.00029  |
| ENSG00000042062 | RIPOR3  | 1.820761627  | 1.59E-06 |
| ENSG00000129538 | RNASE1  | -1.252802836 | 0.000396 |
| ENSG00000165799 | RNASE7  | 3.04113818   | 3.53E-13 |
| ENSG00000026297 | RNASET2 | -1.311703661 | 2.31E-07 |
| ENSG00000115963 | RND3    | 1.137609628  | 7.98E-06 |
| ENSG00000128482 | RNF112  | -2.131151113 | 1.1E-05  |
| ENSG00000113269 | RNF130  | -1.353611943 | 6.35E-17 |
| ENSG00000163162 | RNF149  | 1.433909144  | 4.63E-25 |
| ENSG00000170153 | RNF150  | -3.264721309 | 3.06E-21 |
| ENSG00000176641 | RNF152  | -1.3232818   | 1.06E-05 |
| ENSG00000141576 | RNF157  | -2.053300652 | 1.33E-06 |
| ENSG00000141622 | RNF165  | -2.475003601 | 8.23E-09 |
| ENSG00000145428 | RNF175  | -1.997549241 | 0.043152 |
| ENSG00000164197 | RNF180  | -1.043767403 | 2.16E-05 |
| ENSG00000116514 | RNF19B  | 1.063752181  | 8.82E-05 |

|                 |         |              |          |
|-----------------|---------|--------------|----------|
| ENSG00000158286 | RNF207  | -1.449919234 | 0.000424 |
| ENSG00000178222 | RNF212  | -1.226515715 | 0.000879 |
| ENSG00000189051 | RNF222  | 3.612944764  | 3.17E-29 |
| ENSG00000237330 | RNF223  | 4.032321549  | 1.57E-11 |
| ENSG00000233198 | RNF224  | 3.026657721  | 0.002594 |
| ENSG00000269855 | RNF225  | 2.350976737  | 0.001944 |
| ENSG00000204618 | RNF39   | 2.026601161  | 9.39E-15 |
| ENSG00000023191 | RNH1    | 1.121443392  | 1.96E-07 |
| ENSG00000185946 | RNPC3   | -1.071990237 | 8.41E-05 |
| ENSG00000154133 | ROBO4   | -1.289817262 | 0.000259 |
| ENSG00000065371 | ROPN1   | -2.481756418 | 4.77E-06 |
| ENSG00000114547 | ROPN1B  | -2.518101559 | 1.09E-09 |
| ENSG00000198963 | RORB    | -3.704119119 | 1.54E-12 |
| ENSG00000143365 | RORC    | -1.361101298 | 1.07E-07 |
| ENSG00000104237 | RP1     | -1.587601834 | 0.029787 |
| ENSG00000116745 | RPE65   | -3.285845866 | 0.000143 |
| ENSG00000092200 | RPGRIP1 | -1.663528969 | 0.026498 |
| ENSG00000181031 | RPH3AL  | -1.50871551  | 5.11E-05 |
| ENSG00000163584 | RPL22L1 | 2.040814473  | 4.23E-13 |
| ENSG00000037241 | RPL26L1 | 1.051618232  | 7.43E-05 |
| ENSG00000140986 | RPL3L   | 2.915028016  | 0.00247  |
| ENSG00000124787 | RPP40   | 1.538199178  | 2.65E-07 |
| ENSG00000162302 | RPS6KA4 | 1.643207521  | 3.18E-09 |
| ENSG00000175634 | RPS6KB2 | 1.822577777  | 2.6E-13  |
| ENSG00000198208 | RPS6KL1 | -1.067276256 | 0.008836 |
| ENSG00000215853 | RPTN    | 1.323243011  | 0.000375 |
| ENSG00000025039 | RRAGD   | -1.031128583 | 0.000147 |
| ENSG00000126458 | RRAS    | -1.089475736 | 2.74E-08 |
| ENSG00000180245 | RRH     | -2.319332058 | 0.014324 |
| ENSG00000171848 | RRM2    | 2.544492785  | 1.39E-10 |
| ENSG00000160188 | RSPH1   | -1.309940093 | 4.13E-05 |
| ENSG00000100218 | RSPH14  | -1.715867765 | 0.010092 |
| ENSG00000111834 | RSPH4A  | -1.370037408 | 0.009247 |
| ENSG00000169218 | RSPO1   | -1.805386231 | 0.000208 |
| ENSG00000146374 | RSPO3   | -1.924795067 | 2.44E-08 |
| ENSG00000242732 | RTL5    | -2.265520777 | 1.81E-09 |
| ENSG00000139970 | RTN1    | -1.77157815  | 0.001293 |
| ENSG00000136514 | RTP4    | 1.088011781  | 0.002854 |
| ENSG00000108309 | RUNDC3A | 3.075726104  | 1.33E-12 |
| ENSG00000079102 | RUNX1T1 | -2.258209034 | 8.96E-09 |
| ENSG00000020633 | RUNX3   | -1.254287189 | 0.000104 |
| ENSG00000175792 | RUVBL1  | 1.022004816  | 5.82E-06 |
| ENSG00000143171 | RXRG    | -2.171681813 | 1.25E-07 |
| ENSG00000198626 | RYR2    | -2.277147675 | 4.44E-08 |
| ENSG00000198838 | RYR3    | -2.019073745 | 3.26E-12 |
| ENSG00000160678 | S100A1  | -2.303241747 | 2.14E-13 |
| ENSG00000197747 | S100A10 | 1.242860495  | 1.03E-05 |
| ENSG00000163191 | S100A11 | 1.777651859  | 2.43E-09 |

|                 |         |              |          |
|-----------------|---------|--------------|----------|
| ENSG00000163221 | S100A12 | 7.753422592  | 1.73E-13 |
| ENSG00000189334 | S100A14 | 2.362155178  | 6.71E-18 |
| ENSG00000188643 | S100A16 | 2.550842337  | 1.81E-15 |
| ENSG00000196754 | S100A2  | 3.792335877  | 8.32E-25 |
| ENSG00000188015 | S100A3  | 1.112782043  | 0.002116 |
| ENSG00000143556 | S100A7  | 9.095197328  | 1.55E-25 |
| ENSG00000184330 | S100A7A | 9.540327102  | 6.86E-20 |
| ENSG00000143546 | S100A8  | 8.773178826  | 2.12E-33 |
| ENSG00000163220 | S100A9  | 9.121613439  | 7.41E-34 |
| ENSG00000160307 | S100B   | -1.894192867 | 4.98E-07 |
| ENSG00000170989 | S1PR1   | -1.400578576 | 9E-07    |
| ENSG00000173432 | SAA1    | -1.355178366 | 0.023983 |
| ENSG00000168061 | SAC3D1  | 1.235639212  | 7.48E-05 |
| ENSG00000165821 | SALL2   | -1.648890791 | 2.01E-08 |
| ENSG00000177570 | SAMD12  | -1.499565679 | 2.12E-06 |
| ENSG00000100583 | SAMD15  | 1.646737879  | 0.000621 |
| ENSG00000020577 | SAMD4A  | -1.903273443 | 6.11E-12 |
| ENSG00000205413 | SAMD9   | 1.747830859  | 6.83E-09 |
| ENSG00000155307 | SAMSN1  | 1.637775956  | 0.002925 |
| ENSG00000228727 | SAPCD1  | -1.962069943 | 0.000322 |
| ENSG00000123453 | SARDH   | -2.600850901 | 0.000606 |
| ENSG00000004139 | SARM1   | -1.502578893 | 4E-07    |
| ENSG00000119042 | SATB2   | -1.054042621 | 0.009886 |
| ENSG00000188322 | SBK1    | -1.612641568 | 1.42E-05 |
| ENSG00000189001 | SBSN    | 3.268574693  | 2.11E-08 |
| ENSG00000164764 | SBSPON  | -2.122095901 | 1.77E-09 |
| ENSG00000198794 | SCAMP5  | -1.575088973 | 0.000332 |
| ENSG00000168077 | SCARA3  | -1.050841206 | 4.89E-05 |
| ENSG00000168079 | SCARA5  | -2.792625098 | 5.04E-07 |
| ENSG00000073060 | SCARB1  | -1.057251424 | 6.85E-09 |
| ENSG00000143653 | SCCPDH  | -1.07733662  | 3.18E-06 |
| ENSG00000145284 | SCD5    | -2.199997834 | 1.14E-10 |
| ENSG00000171951 | SCG2    | 2.056443271  | 0.010364 |
| ENSG00000124935 | SCGB1D2 | -4.584987793 | 1.83E-12 |
| ENSG00000124939 | SCGB2A1 | -4.266149389 | 2.3E-10  |
| ENSG00000110484 | SCGB2A2 | -4.093641217 | 1.76E-12 |
| ENSG00000205209 | SCGB2B2 | -2.867600256 | 3.11E-09 |
| ENSG00000161055 | SCGB3A1 | -4.800558505 | 9.35E-06 |
| ENSG00000161929 | SCIMP   | -1.60590491  | 0.003354 |
| ENSG00000006747 | SCIN    | -2.438589436 | 3.08E-13 |
| ENSG00000146285 | SCML4   | -1.349727157 | 0.016964 |
| ENSG00000168356 | SCN11A  | -1.644598422 | 0.007472 |
| ENSG00000149575 | SCN2B   | -1.570787147 | 0.0022   |
| ENSG00000153253 | SCN3A   | -2.264372468 | 7.21E-05 |
| ENSG00000007314 | SCN4A   | -3.12794066  | 3.12E-06 |
| ENSG00000183873 | SCN5A   | -2.191792893 | 9.61E-06 |
| ENSG00000136546 | SCN7A   | -3.568763095 | 6.42E-09 |
| ENSG00000169432 | SCN9A   | -2.115539783 | 3.45E-06 |

|                 |           |              |          |
|-----------------|-----------|--------------|----------|
| ENSG00000130489 | SCO2      | 4.465312493  | 0.002517 |
| ENSG00000159307 | SCUBE1    | -2.380693331 | 0.002742 |
| ENSG00000146197 | SCUBE3    | -2.677491932 | 9.07E-09 |
| ENSG00000115884 | SDC1      | 1.643121881  | 1.94E-06 |
| ENSG00000169439 | SDC2      | -1.776033766 | 4.43E-15 |
| ENSG00000125775 | SDCBP2    | 2.477779669  | 7.82E-13 |
| ENSG00000170786 | SDR16C5   | 2.729774343  | 1.4E-35  |
| ENSG00000184860 | SDR42E1   | 1.051938753  | 8.37E-07 |
| ENSG00000170426 | SDR9C7    | 5.126805674  | 1.32E-15 |
| ENSG00000135094 | SDS       | 3.137324205  | 0.000535 |
| ENSG00000100003 | SEC14L2   | 1.45365227   | 1.19E-09 |
| ENSG00000103184 | SEC14L5   | -1.255113222 | 0.001675 |
| ENSG00000132432 | SEC61G    | 1.266612904  | 4.3E-07  |
| ENSG00000007908 | SELE      | 2.371600554  | 1E-06    |
| ENSG00000143416 | SELENBP1  | -2.011353169 | 1.02E-10 |
| ENSG00000138018 | SELENOI   | 1.213812717  | 2.97E-10 |
| ENSG00000198832 | SELENOM   | -1.449983521 | 2.9E-07  |
| ENSG00000250722 | SELENOP   | -1.091658264 | 3.24E-05 |
| ENSG00000127922 | SEM1      | 1.05971667   | 1.98E-07 |
| ENSG00000075213 | SEMA3A    | -2.265432308 | 2.6E-05  |
| ENSG00000012171 | SEMA3B    | -2.434581454 | 5.39E-14 |
| ENSG00000153993 | SEMA3D    | -3.387332436 | 7.22E-11 |
| ENSG00000170381 | SEMA3E    | -3.108109672 | 2.47E-12 |
| ENSG00000010319 | SEMA3G    | -2.612095616 | 2.41E-18 |
| ENSG00000185033 | SEMA4B    | 1.562292855  | 3.9E-17  |
| ENSG00000187764 | SEMA4D    | 1.506569519  | 4.53E-16 |
| ENSG00000112902 | SEMA5A    | -1.369742897 | 2.53E-06 |
| ENSG00000138623 | SEMA7A    | 1.842502269  | 4.62E-08 |
| ENSG00000138758 | SEPT11    | -1.64939644  | 3.99E-08 |
| ENSG00000184702 | SEPT5     | 1.752684354  | 0.044835 |
| ENSG00000125354 | SEPT6     | -1.316144309 | 6.15E-06 |
| ENSG00000164402 | SEPT8     | 1.276345043  | 2.3E-10  |
| ENSG00000142864 | SERBP1    | 1.169887102  | 5.46E-12 |
| ENSG00000183569 | SERHL2    | -2.829473598 | 2.66E-07 |
| ENSG00000168528 | SERINC2   | 1.322408797  | 2.24E-06 |
| ENSG00000151778 | SERP2     | -1.735867373 | 3.27E-05 |
| ENSG00000197249 | SERPINA1  | 1.75767465   | 0.001372 |
| ENSG00000165953 | SERPINA12 | 1.36596861   | 0.000793 |
| ENSG00000188488 | SERPINA5  | -3.253441009 | 1.52E-10 |
| ENSG00000170054 | SERPINA9  | -1.422318103 | 0.017781 |
| ENSG00000021355 | SERPINB1  | 1.358280293  | 0.003265 |
| ENSG00000242550 | SERPINB10 | 2.692823221  | 3.87E-06 |
| ENSG00000206072 | SERPINB11 | 4.507686442  | 3.11E-06 |
| ENSG00000166634 | SERPINB12 | 2.950433641  | 1.69E-06 |
| ENSG00000197641 | SERPINB13 | 3.387524438  | 3.28E-26 |
| ENSG00000197632 | SERPINB2  | 2.0869001    | 5.2E-07  |
| ENSG00000057149 | SERPINB3  | 7.227862307  | 5.07E-35 |
| ENSG00000206073 | SERPINB4  | 11.24570145  | 3.06E-31 |

|                 |          |              |          |
|-----------------|----------|--------------|----------|
| ENSG00000206075 | SERPINB5 | 2.628405863  | 6.99E-15 |
| ENSG00000166396 | SERPINB7 | 3.237285235  | 6.75E-09 |
| ENSG00000166401 | SERPINB8 | 2.114675661  | 1.09E-13 |
| ENSG00000106366 | SERPINE1 | 2.490398307  | 2.94E-05 |
| ENSG00000135919 | SERPINE2 | 1.07608352   | 0.003047 |
| ENSG00000132386 | SERPINF1 | -1.366807034 | 5.84E-07 |
| ENSG00000149131 | SERPING1 | -1.762653352 | 1.19E-10 |
| ENSG00000163536 | SERPINI1 | -1.243562289 | 4.11E-06 |
| ENSG00000197019 | SERTAD1  | 1.441616827  | 3.36E-09 |
| ENSG00000130766 | SESN2    | 1.379447353  | 4.01E-05 |
| ENSG00000187231 | SESTD1   | -1.249765642 | 2.3E-06  |
| ENSG00000169976 | SF3B5    | 1.014500997  | 1.43E-05 |
| ENSG00000175793 | SFN      | 3.278992381  | 3.64E-22 |
| ENSG00000104332 | SFRP1    | -1.209214465 | 1.48E-05 |
| ENSG00000106483 | SFRP4    | -1.32876986  | 0.005272 |
| ENSG00000120057 | SFRP5    | -4.112774526 | 9.6E-07  |
| ENSG00000168484 | SFTPC    | -2.817852463 | 0.009596 |
| ENSG00000133661 | SFTPD    | 1.919581514  | 6.26E-10 |
| ENSG00000108823 | SGCA     | -3.203147208 | 2.54E-08 |
| ENSG00000163069 | SGCB     | -1.029253047 | 4.36E-06 |
| ENSG00000170624 | SGCD     | -1.099367568 | 0.000385 |
| ENSG00000127990 | SGCE     | -1.897323313 | 8.33E-11 |
| ENSG00000102683 | SGCG     | -2.231746061 | 1.52E-08 |
| ENSG00000101049 | SGK2     | -1.080712216 | 0.007494 |
| ENSG00000163082 | SGPP2    | 1.308876171  | 0.000639 |
| ENSG00000167037 | SGSM1    | -2.699086041 | 2.82E-13 |
| ENSG00000027869 | SH2D2A   | 2.040747056  | 0.028595 |
| ENSG00000189410 | SH2D5    | 8.329007672  | 1.26E-18 |
| ENSG00000185437 | SH3BGR   | -1.873274718 | 4.56E-10 |
| ENSG00000198478 | SH3BGRL2 | -1.772207433 | 1.78E-11 |
| ENSG00000142669 | SH3BGRL3 | 1.727065112  | 2.83E-16 |
| ENSG00000131370 | SH3BP5   | -1.122943738 | 2.23E-06 |
| ENSG00000141985 | SH3GL1   | 1.21739774   | 1.33E-06 |
| ENSG00000140600 | SH3GL3   | 3.114743286  | 3.39E-07 |
| ENSG00000162105 | SHANK2   | -1.350541776 | 5.34E-07 |
| ENSG00000251322 | SHANK3   | -1.023608071 | 0.001324 |
| ENSG00000107338 | SHB      | 1.596579376  | 1.52E-09 |
| ENSG00000129946 | SHC2     | -1.274908142 | 0.00137  |
| ENSG00000148082 | SHC3     | -1.731732587 | 2.15E-07 |
| ENSG00000185634 | SHC4     | -1.160445906 | 0.002412 |
| ENSG00000169291 | SHE      | -1.300239455 | 6.81E-05 |
| ENSG00000138606 | SHF      | -1.021254245 | 0.001837 |
| ENSG00000178343 | SHISA3   | -3.969714001 | 2.24E-05 |
| ENSG00000138944 | SHISAL1  | 1.419515663  | 0.003787 |
| ENSG00000182199 | SHMT2    | 1.228699713  | 6.27E-09 |
| ENSG00000168779 | SHOX2    | -1.538532545 | 5.41E-05 |
| ENSG00000197417 | SHPK     | 1.009664441  | 1.04E-05 |
| ENSG00000146950 | SHROOM2  | 1.050864526  | 5.81E-06 |



|                 |          |              |          |
|-----------------|----------|--------------|----------|
| ENSG00000138771 | SHROOM3  | -1.786089571 | 2.28E-08 |
| ENSG00000158352 | SHROOM4  | -1.228696174 | 0.000844 |
| ENSG00000181788 | SIAH2    | 1.345166363  | 4.43E-09 |
| ENSG00000072858 | SIDT1    | -1.566666192 | 3.63E-06 |
| ENSG00000142512 | SIGLEC10 | 1.10907941   | 0.049036 |
| ENSG00000197046 | SIGLEC15 | -1.710323291 | 0.002467 |
| ENSG00000105492 | SIGLEC6  | -1.633444275 | 0.023595 |
| ENSG00000170145 | SIK2     | -1.304520578 | 1.56E-06 |
| ENSG00000112246 | SIM1     | -1.766622844 | 0.000141 |
| ENSG00000137078 | SIT1     | -1.395462321 | 0.031886 |
| ENSG00000126778 | SIX1     | -3.18009769  | 2.63E-05 |
| ENSG00000100625 | SIX4     | -1.556572259 | 0.002771 |
| ENSG00000154839 | SKA1     | 2.068158272  | 2.47E-05 |
| ENSG00000165480 | SKA3     | 1.968657799  | 0.000114 |
| ENSG00000141293 | SKAP1    | -1.691278684 | 6.8E-05  |
| ENSG00000136603 | SKIL     | 1.188907757  | 4.49E-09 |
| ENSG00000101082 | SLA2     | -1.43016962  | 0.016864 |
| ENSG00000139737 | SLAIN1   | -1.919065555 | 0.002338 |
| ENSG00000026751 | SLAMF7   | 3.585037515  | 5.49E-09 |
| ENSG00000145283 | SLC10A6  | 2.067902365  | 4.49E-07 |
| ENSG00000018280 | SLC11A1  | 1.504908475  | 0.007724 |
| ENSG00000064651 | SLC12A2  | -2.195455602 | 5.92E-10 |
| ENSG00000113504 | SLC12A7  | -1.885766154 | 3.99E-09 |
| ENSG00000221955 | SLC12A8  | 1.257184861  | 0.009391 |
| ENSG00000007216 | SLC13A2  | -3.282366888 | 9.91E-06 |
| ENSG00000158296 | SLC13A3  | -1.006973367 | 0.00013  |
| ENSG00000141485 | SLC13A5  | 3.277875287  | 9.88E-07 |
| ENSG00000141469 | SLC14A1  | -4.032598668 | 5.29E-12 |
| ENSG00000132874 | SLC14A2  | -4.043695532 | 2.58E-06 |
| ENSG00000088386 | SLC15A1  | 1.911320302  | 2.19E-10 |
| ENSG00000163406 | SLC15A2  | -1.019486137 | 0.001016 |
| ENSG00000155380 | SLC16A1  | 1.922617288  | 4.2E-12  |
| ENSG00000174326 | SLC16A11 | -1.207289232 | 0.000401 |
| ENSG00000152779 | SLC16A12 | -2.081321483 | 0.005167 |
| ENSG00000163053 | SLC16A14 | 1.206041284  | 0.000634 |
| ENSG00000147100 | SLC16A2  | -1.30784001  | 1.6E-06  |
| ENSG00000108932 | SLC16A6  | 2.642546495  | 3.3E-07  |
| ENSG00000165449 | SLC16A9  | 2.198551371  | 9.78E-07 |
| ENSG00000104888 | SLC17A7  | -2.284435699 | 1.53E-07 |
| ENSG00000179520 | SLC17A8  | -3.041628558 | 0.045825 |
| ENSG00000165646 | SLC18A2  | -2.267781753 | 6.58E-08 |
| ENSG00000117479 | SLC19A2  | 1.454700443  | 8.39E-11 |
| ENSG00000106688 | SLC1A1   | -1.54175839  | 2.56E-05 |
| ENSG00000110436 | SLC1A2   | -2.316754372 | 4.75E-06 |
| ENSG00000175003 | SLC22A1  | -1.370833713 | 0.024435 |
| ENSG00000197891 | SLC22A12 | -3.297702394 | 0.045955 |
| ENSG00000172940 | SLC22A13 | 2.769511874  | 0.032123 |
| ENSG00000092096 | SLC22A17 | -2.151987863 | 1.93E-07 |



|                 |            |              |          |
|-----------------|------------|--------------|----------|
| ENSG00000254827 | SLC22A18AS | 1.748831398  | 0.022345 |
| ENSG00000137266 | SLC22A23   | 1.581011353  | 6.78E-18 |
| ENSG00000170482 | SLC23A1    | 2.227561891  | 4.36E-06 |
| ENSG00000102743 | SLC25A15   | 1.184569479  | 0.001445 |
| ENSG00000182902 | SLC25A18   | -3.936402307 | 1.2E-06  |
| ENSG00000183032 | SLC25A21   | -2.384482732 | 3.99E-07 |
| ENSG00000153291 | SLC25A27   | -1.371679808 | 0.000659 |
| ENSG00000197119 | SLC25A29   | -1.191689995 | 0.000513 |
| ENSG00000125434 | SLC25A35   | -1.17465047  | 6.93E-06 |
| ENSG00000013306 | SLC25A39   | 1.062647853  | 2.71E-06 |
| ENSG00000151729 | SLC25A4    | -1.538370052 | 6.41E-17 |
| ENSG00000181035 | SLC25A42   | -1.179265027 | 3.11E-05 |
| ENSG00000077713 | SLC25A43   | 1.154180358  | 1.45E-06 |
| ENSG00000162241 | SLC25A45   | -1.034558953 | 0.000242 |
| ENSG00000145832 | SLC25A48   | -1.370891068 | 0.000108 |
| ENSG00000005022 | SLC25A5    | 1.023442709  | 5.07E-05 |
| ENSG00000135502 | SLC26A10   | -2.091407015 | 0.005353 |
| ENSG00000155850 | SLC26A2    | -1.68276533  | 6.56E-08 |
| ENSG00000170615 | SLC26A5    | -2.64695354  | 0.004284 |
| ENSG00000147606 | SLC26A7    | -1.922709303 | 0.003223 |
| ENSG00000174502 | SLC26A9    | 1.72755745   | 6.44E-05 |
| ENSG00000130304 | SLC27A1    | -1.404151424 | 2.76E-06 |
| ENSG00000140284 | SLC27A2    | -1.711268482 | 0.010402 |
| ENSG00000167114 | SLC27A4    | 1.859428543  | 9.16E-11 |
| ENSG00000113396 | SLC27A6    | -3.075955433 | 1.45E-06 |
| ENSG00000197506 | SLC28A3    | 2.892485683  | 1.03E-14 |
| ENSG00000112759 | SLC29A1    | -1.245457927 | 2.68E-07 |
| ENSG00000174669 | SLC29A2    | -1.656055841 | 2.3E-05  |
| ENSG00000164638 | SLC29A4    | -1.279348732 | 0.006825 |
| ENSG00000117394 | SLC2A1     | 1.768998052  | 5.76E-13 |
| ENSG00000197496 | SLC2A10    | -1.528783077 | 5.35E-05 |
| ENSG00000133460 | SLC2A11    | -1.791145987 | 1.34E-08 |
| ENSG00000146411 | SLC2A12    | -1.232311336 | 0.002581 |
| ENSG00000181856 | SLC2A4     | -3.781395484 | 1.56E-19 |
| ENSG00000170385 | SLC30A1    | 1.097562391  | 7.75E-05 |
| ENSG00000136868 | SLC31A1    | 1.088490523  | 7.03E-06 |
| ENSG00000131183 | SLC34A1    | 2.924874812  | 8.92E-05 |
| ENSG00000157765 | SLC34A2    | -2.35231733  | 3.09E-06 |
| ENSG00000100036 | SLC35E4    | 1.275476711  | 5.87E-07 |
| ENSG00000196376 | SLC35F1    | -2.748254715 | 4.92E-06 |
| ENSG00000123643 | SLC36A1    | 1.121274806  | 3.53E-07 |
| ENSG00000160190 | SLC37A1    | -1.048240844 | 2.55E-06 |
| ENSG00000134955 | SLC37A2    | 2.685981078  | 2.02E-19 |
| ENSG00000169507 | SLC38A11   | -1.783795137 | 0.001376 |
| ENSG00000139209 | SLC38A4    | 1.428481627  | 0.002497 |
| ENSG00000017483 | SLC38A5    | 2.069730877  | 5.08E-26 |
| ENSG00000165794 | SLC39A2    | 2.73681486   | 2.04E-19 |
| ENSG00000141424 | SLC39A6    | 1.172359618  | 7.71E-08 |

|                 |          |              |          |
|-----------------|----------|--------------|----------|
| ENSG00000138821 | SLC39A8  | -1.301730506 | 2.2E-06  |
| ENSG00000168003 | SLC3A2   | 1.000445252  | 1.29E-11 |
| ENSG00000138449 | SLC40A1  | -1.146436133 | 3.43E-05 |
| ENSG00000136052 | SLC41A2  | -1.310035077 | 0.00403  |
| ENSG00000204385 | SLC44A4  | -1.868222228 | 1.55E-05 |
| ENSG00000162426 | SLC45A1  | -2.171206544 | 0.001775 |
| ENSG00000076351 | SLC46A1  | -1.544941843 | 4.44E-05 |
| ENSG00000119457 | SLC46A2  | 3.393639822  | 2.85E-10 |
| ENSG00000139508 | SLC46A3  | -1.786001019 | 2.08E-13 |
| ENSG00000180638 | SLC47A2  | 1.448005658  | 5.88E-05 |
| ENSG00000004939 | SLC4A1   | -2.356621187 | 0.001446 |
| ENSG00000080493 | SLC4A4   | -4.292539682 | 6.7E-11  |
| ENSG00000188687 | SLC4A5   | -1.437130326 | 0.002616 |
| ENSG00000050438 | SLC4A8   | 1.79924593   | 8.61E-10 |
| ENSG00000132517 | SLC52A1  | -1.276354294 | 0.006163 |
| ENSG00000100170 | SLC5A1   | 2.592499094  | 8.3E-12  |
| ENSG00000154025 | SLC5A10  | 2.022738947  | 1.43E-06 |
| ENSG00000105641 | SLC5A5   | 4.400387841  | 0.000104 |
| ENSG00000132164 | SLC6A11  | 3.546314973  | 1.59E-23 |
| ENSG00000268104 | SLC6A14  | 1.051660346  | 0.024664 |
| ENSG00000072041 | SLC6A15  | 1.827267861  | 0.000145 |
| ENSG00000063127 | SLC6A16  | -1.914095743 | 0.002428 |
| ENSG00000196517 | SLC6A9   | 1.457376756  | 5.41E-16 |
| ENSG00000139514 | SLC7A1   | 1.404138067  | 1.58E-10 |
| ENSG00000130876 | SLC7A10  | -3.160906489 | 0.006726 |
| ENSG00000151012 | SLC7A11  | 4.040563023  | 7.94E-24 |
| ENSG00000003989 | SLC7A2   | -1.833934319 | 2.72E-09 |
| ENSG00000103257 | SLC7A5   | 2.233169612  | 6.15E-11 |
| ENSG00000155465 | SLC7A7   | -1.029000043 | 0.021231 |
| ENSG00000092068 | SLC7A8   | 1.679885203  | 5.24E-18 |
| ENSG00000183023 | SLC8A1   | -1.627680988 | 1.18E-05 |
| ENSG00000100678 | SLC8A3   | -2.304079443 | 0.001387 |
| ENSG00000115616 | SLC9A2   | -3.278011204 | 6.05E-13 |
| ENSG00000109062 | SLC9A3R1 | 1.041909101  | 0.00021  |
| ENSG00000065054 | SLC9A3R2 | -1.317175236 | 1.71E-06 |
| ENSG00000180251 | SLC9A4   | -2.808472365 | 4.26E-10 |
| ENSG00000164037 | SLC9B1   | -1.446475308 | 0.011818 |
| ENSG00000101187 | SLCO4A1  | 1.070407902  | 0.001086 |
| ENSG00000145147 | SLIT2    | -1.848369309 | 2.64E-10 |
| ENSG00000184347 | SLIT3    | -2.284499973 | 3.58E-08 |
| ENSG00000185985 | SLITRK2  | -1.303991602 | 0.011304 |
| ENSG00000179542 | SLITRK4  | -1.642937941 | 5.31E-06 |
| ENSG00000165300 | SLITRK5  | -3.813527155 | 7.48E-12 |
| ENSG00000184564 | SLITRK6  | -1.001183722 | 0.002362 |
| ENSG00000124107 | SLPI     | 3.177789858  | 7.74E-16 |
| ENSG00000126233 | SLURP1   | 4.464826838  | 5.48E-13 |
| ENSG00000283992 | SLURP2   | 5.494850787  | 4.56E-10 |
| ENSG00000120693 | SMAD9    | -1.292162786 | 0.000137 |

|                 |           |              |          |
|-----------------|-----------|--------------|----------|
| ENSG00000170545 | SMAGP     | 1.325035568  | 2.21E-07 |
| ENSG00000102038 | SMARCA1   | -1.142333769 | 2.08E-06 |
| ENSG00000082014 | SMARCD3   | -1.535350261 | 3.47E-08 |
| ENSG00000165935 | SMCO2     | 4.904525447  | 1.36E-08 |
| ENSG00000184785 | SMIM10    | -2.004791032 | 7.48E-10 |
| ENSG00000178947 | SMIM10L2A | -2.365805093 | 4.92E-15 |
| ENSG00000196972 | SMIM10L2B | -1.457546858 | 8.43E-05 |
| ENSG00000267795 | SMIM22    | -1.60570009  | 0.022643 |
| ENSG00000204323 | SMIM5     | 2.062215358  | 1.16E-13 |
| ENSG00000198732 | SMOC1     | -2.362234364 | 8.22E-08 |
| ENSG00000112562 | SMOC2     | -1.285821038 | 4.1E-06  |
| ENSG00000088826 | SMOX      | 3.354049564  | 7.97E-18 |
| ENSG00000135587 | SMPD2     | 1.62597935   | 3.96E-13 |
| ENSG00000103056 | SMPD3     | 3.352868301  | 5.39E-26 |
| ENSG00000145335 | SNCA      | -1.22723876  | 1.36E-07 |
| ENSG00000064692 | SNCAIP    | -1.003761899 | 0.00189  |
| ENSG00000074317 | SNCB      | 4.898577018  | 3.43E-10 |
| ENSG00000173267 | SNCG      | -2.460039028 | 1.53E-13 |
| ENSG00000162804 | SNED1     | -1.392248919 | 0.000189 |
| ENSG00000182600 | SNORC     | -1.799739542 | 1.69E-05 |
| ENSG00000125835 | SNRPB     | 1.0562985    | 1.69E-08 |
| ENSG00000143977 | SNRPG     | 1.202331042  | 1.23E-05 |
| ENSG00000172164 | SNTB1     | -1.34065631  | 7E-06    |
| ENSG00000157734 | SNX22     | -1.010353389 | 0.006355 |
| ENSG00000112320 | SOBP      | -2.11420123  | 6.69E-14 |
| ENSG00000185338 | SOCS1     | 1.259307519  | 0.04292  |
| ENSG00000184557 | SOCS3     | 2.022446685  | 9.36E-07 |
| ENSG00000109610 | SOD3      | -2.972485249 | 6E-28    |
| ENSG00000095637 | SORBS1    | -3.002908929 | 2.57E-19 |
| ENSG00000154556 | SORBS2    | -2.271489865 | 1.26E-15 |
| ENSG00000108018 | SORCS1    | -1.539228961 | 0.001503 |
| ENSG00000184985 | SORCS2    | 1.203017133  | 2.66E-05 |
| ENSG00000156395 | SORCS3    | -3.330881    | 0.007909 |
| ENSG00000137642 | SORL1     | -1.07849873  | 4.39E-05 |
| ENSG00000198944 | SOWAHA    | -3.426447135 | 2.48E-09 |
| ENSG00000100146 | SOX10     | -2.155405664 | 6.18E-10 |
| ENSG00000143842 | SOX13     | -1.933755696 | 1.23E-15 |
| ENSG00000129194 | SOX15     | 1.720812708  | 1.45E-09 |
| ENSG00000203883 | SOX18     | -1.056816789 | 0.006089 |
| ENSG00000125285 | SOX21     | 1.536082653  | 4.83E-08 |
| ENSG00000134532 | SOX5      | -2.273279614 | 1E-11    |
| ENSG00000110693 | SOX6      | -1.09161605  | 0.005272 |
| ENSG00000171056 | SOX7      | 1.23959978   | 1.48E-06 |
| ENSG00000005513 | SOX8      | -2.926969111 | 4.98E-09 |
| ENSG00000125398 | SOX9      | -1.37964846  | 1.76E-09 |
| ENSG00000079263 | SP140     | -1.678140047 | 5.41E-06 |
| ENSG00000189120 | SP6       | 1.782586385  | 6.16E-08 |
| ENSG00000235387 | SPAAR     | -2.434277847 | 0.00011  |

|                 |         |              |          |
|-----------------|---------|--------------|----------|
| ENSG00000177202 | SPACA4  | 2.853751972  | 0.010213 |
| ENSG00000165698 | SPACA9  | 1.039744311  | 1.54E-07 |
| ENSG00000104450 | SPAG1   | 1.300506367  | 2.01E-05 |
| ENSG00000076382 | SPAG5   | 1.029023145  | 0.000292 |
| ENSG00000077327 | SPAG6   | -3.573545409 | 1.75E-06 |
| ENSG00000137098 | SPAG8   | -2.284079183 | 0.001854 |
| ENSG00000152583 | SPARCL1 | -1.825128042 | 7.91E-14 |
| ENSG00000186451 | SPATA12 | 2.314394818  | 0.025727 |
| ENSG00000006282 | SPATA20 | -1.12113613  | 5.41E-06 |
| ENSG00000150628 | SPATA4  | -2.642740803 | 0.028085 |
| ENSG00000132122 | SPATA6  | -1.192923191 | 2.47E-07 |
| ENSG00000161888 | SPC24   | 1.172188652  | 0.00121  |
| ENSG00000152253 | SPC25   | 1.489799373  | 3.98E-05 |
| ENSG00000124664 | SPDEF   | -3.433469395 | 4.05E-06 |
| ENSG00000163806 | SPDYA   | 1.858858525  | 0.030692 |
| ENSG00000152582 | SPEF2   | -2.22104516  | 6.82E-11 |
| ENSG00000072195 | SPEG    | -1.459992225 | 1.18E-06 |
| ENSG00000147059 | SPIN2A  | -2.471246956 | 0.039521 |
| ENSG00000214510 | SPINK13 | 4.52870512   | 2.77E-06 |
| ENSG00000178172 | SPINK6  | 6.990479239  | 1.39E-17 |
| ENSG00000145879 | SPINK7  | 6.414139304  | 3.32E-16 |
| ENSG00000204909 | SPINK9  | 9.813184956  | 1.66E-56 |
| ENSG00000183018 | SPNS2   | 1.365695435  | 8.51E-07 |
| ENSG00000152377 | SPOCK1  | -1.411809526 | 0.001503 |
| ENSG00000262655 | SPON1   | -1.004431673 | 0.00446  |
| ENSG00000169474 | SPRR1A  | 9.948241195  | 4.4E-38  |
| ENSG00000169469 | SPRR1B  | 8.957382345  | 6.31E-44 |
| ENSG00000241794 | SPRR2A  | 13.87315519  | 1.72E-31 |
| ENSG00000196805 | SPRR2B  | 9.962900231  | 7.94E-24 |
| ENSG00000163216 | SPRR2D  | 7.840705215  | 3.89E-15 |
| ENSG00000203785 | SPRR2E  | 6.259508987  | 1.14E-19 |
| ENSG00000244094 | SPRR2F  | 7.337552893  | 2.18E-07 |
| ENSG00000159516 | SPRR2G  | 6.609560108  | 7.35E-19 |
| ENSG00000163209 | SPRR3   | 8.937340888  | 3.58E-40 |
| ENSG00000184148 | SPRR4   | 3.114477761  | 0.003563 |
| ENSG00000283227 | SPRR5   | 2.029410426  | 0.008243 |
| ENSG00000164056 | SPRY1   | -1.097424119 | 2.07E-05 |
| ENSG00000070182 | SPTB    | -2.856752058 | 1.04E-10 |
| ENSG00000115306 | SPTBN1  | -1.546561146 | 1.52E-09 |
| ENSG00000160460 | SPTBN4  | -2.640554433 | 3.53E-11 |
| ENSG00000172296 | SPTLC3  | 1.356849204  | 9.22E-13 |
| ENSG00000165389 | SPTSSA  | 1.043515838  | 0.000319 |
| ENSG00000134548 | SPX     | -5.441982394 | 4.37E-08 |
| ENSG00000104549 | SQLE    | 1.935572152  | 1.48E-14 |
| ENSG00000137767 | SQOR    | 1.450533848  | 1.83E-07 |
| ENSG00000196220 | SRGAP3  | -1.168306294 | 0.00039  |
| ENSG00000185739 | SRL     | -2.405651201 | 1.49E-06 |
| ENSG00000125508 | SRMS    | 3.445149544  | 0.004328 |

|                 |            |              |          |
|-----------------|------------|--------------|----------|
| ENSG00000096063 | SRPK1      | 1.607892623  | 3.24E-17 |
| ENSG00000184343 | SRPK3      | -3.817230979 | 7.02E-06 |
| ENSG00000101955 | SRPX       | -1.015629969 | 0.004751 |
| ENSG00000102359 | SRPX2      | -1.670763429 | 1.17E-05 |
| ENSG00000139767 | SRRM4      | -4.767699005 | 0.000356 |
| ENSG00000111786 | SRSF9      | 1.222811653  | 1.43E-08 |
| ENSG00000179954 | SSC5D      | -1.860378515 | 0.000129 |
| ENSG00000123096 | SSPN       | -2.553447923 | 3.23E-18 |
| ENSG00000197558 | SSPO       | -1.95039843  | 0.002201 |
| ENSG00000139874 | SSTR1      | -2.19844993  | 0.003401 |
| ENSG00000180616 | SSTR2      | -1.249537463 | 0.027846 |
| ENSG00000149418 | ST14       | 1.453742713  | 4.72E-08 |
| ENSG00000008513 | ST3GAL1    | -1.354044951 | 2.17E-06 |
| ENSG00000126091 | ST3GAL3    | -1.003757571 | 0.017619 |
| ENSG00000110080 | ST3GAL4    | -1.070043798 | 2.85E-05 |
| ENSG00000073849 | ST6GAL1    | -1.589204775 | 5.24E-09 |
| ENSG00000144057 | ST6GAL2    | -2.714730956 | 1.91E-06 |
| ENSG00000117069 | ST6GALNAC5 | -2.55152875  | 2.88E-07 |
| ENSG00000140557 | ST8SIA2    | 4.934946354  | 1.01E-11 |
| ENSG00000148488 | ST8SIA6    | -1.133447849 | 0.01025  |
| ENSG00000010327 | STAB1      | -1.075750885 | 0.016658 |
| ENSG00000136011 | STAB2      | -3.496630928 | 1.16E-05 |
| ENSG00000144681 | STAC       | -2.182856745 | 1.27E-09 |
| ENSG00000141750 | STAC2      | -2.080846762 | 1.2E-06  |
| ENSG00000136738 | STAM       | 1.136539741  | 2.6E-05  |
| ENSG00000178078 | STAP2      | 1.082208446  | 1.23E-07 |
| ENSG00000214530 | STARD10    | 1.038917534  | 2.15E-06 |
| ENSG00000133121 | STARD13    | -1.278420902 | 3.57E-06 |
| ENSG00000164211 | STARD4     | 1.491371753  | 9.54E-05 |
| ENSG00000159433 | STARD9     | -1.633746263 | 2.04E-06 |
| ENSG00000115415 | STAT1      | 1.031773131  | 4.57E-05 |
| ENSG00000138378 | STAT4      | -1.270578743 | 8.1E-05  |
| ENSG00000126561 | STAT5A     | -1.213858006 | 2.79E-06 |
| ENSG00000105889 | STEAP1B    | 2.739965616  | 4.85E-05 |
| ENSG00000157214 | STEAP2     | -2.025656287 | 1.29E-15 |
| ENSG00000123473 | STIL       | 1.169485207  | 0.000761 |
| ENSG00000164543 | STK17A     | 1.097020565  | 0.001143 |
| ENSG00000196335 | STK31      | -2.485451368 | 7.77E-06 |
| ENSG00000169302 | STK32A     | -2.158153636 | 6.48E-11 |
| ENSG00000152953 | STK32B     | -1.045164992 | 0.016373 |
| ENSG00000130413 | STK33      | -2.182591245 | 0.003104 |
| ENSG00000104435 | STMN2      | -1.464787801 | 5.14E-05 |
| ENSG00000230873 | STMND1     | -2.213075145 | 0.035797 |
| ENSG00000243317 | STMP1      | 1.05011167   | 4.32E-07 |
| ENSG00000140022 | STON2      | 1.453769515  | 1.08E-10 |
| ENSG00000242866 | STRC       | -2.500226427 | 0.016195 |
| ENSG00000128578 | STRIP2     | 1.980262746  | 1.64E-10 |
| ENSG00000203685 | STUM       | -2.853694508 | 2.17E-10 |

|                 |          |              |          |
|-----------------|----------|--------------|----------|
| ENSG00000178750 | STX19    | 1.051514835  | 0.000267 |
| ENSG00000168952 | STXBP6   | -1.121434677 | 1.11E-05 |
| ENSG00000113387 | SUB1     | 1.009396331  | 0.000524 |
| ENSG00000196562 | SULF2    | 1.533283837  | 1.07E-21 |
| ENSG00000196502 | SULT1A1  | -2.330840394 | 3.41E-12 |
| ENSG00000197165 | SULT1A2  | -4.403141245 | 0.00016  |
| ENSG00000198075 | SULT1C4  | -2.011222549 | 0.005893 |
| ENSG00000088002 | SULT2B1  | 3.196302904  | 7.08E-15 |
| ENSG00000130540 | SULT4A1  | -2.011603769 | 0.014462 |
| ENSG00000139531 | SUOX     | -1.325056828 | 3.1E-11  |
| ENSG00000099994 | SUSD2    | -1.652209168 | 2.67E-05 |
| ENSG00000173705 | SUSD5    | -1.097848319 | 0.0101   |
| ENSG00000152455 | SUV39H2  | 1.340505888  | 0.001754 |
| ENSG00000185518 | SV2B     | -1.731596134 | 1.6E-07  |
| ENSG00000165124 | SVEP1    | -3.041471117 | 5.48E-11 |
| ENSG00000198168 | SVIP     | -1.450351623 | 4.22E-07 |
| ENSG00000157703 | SVOPL    | -1.845778469 | 0.046427 |
| ENSG00000147642 | SYBU     | -1.79088034  | 1.3E-15  |
| ENSG00000217442 | SYCE3    | 3.189442755  | 0.022679 |
| ENSG00000198765 | SYCP1    | -3.583283084 | 0.004307 |
| ENSG00000196074 | SYCP2    | -1.325081366 | 0.000784 |
| ENSG00000097096 | SYDE2    | -2.375430241 | 1.07E-08 |
| ENSG00000165025 | SYK      | 1.158493691  | 9.23E-16 |
| ENSG00000157152 | SYN2     | -2.367020298 | 1.98E-10 |
| ENSG00000185666 | SYN3     | -2.844157816 | 0.01998  |
| ENSG00000162520 | SYNC     | -1.151458994 | 2.46E-07 |
| ENSG00000101463 | SYNDIG1  | -2.162005161 | 0.03128  |
| ENSG00000183379 | SYNDIG1L | -3.699142349 | 0.011113 |
| ENSG00000131018 | SYNE1    | -2.047682139 | 1.3E-12  |
| ENSG00000176438 | SYNE3    | -1.705101792 | 4.68E-07 |
| ENSG00000182253 | SYNM     | -2.693467434 | 1.45E-16 |
| ENSG00000171992 | SYNPO    | -1.024845932 | 0.002973 |
| ENSG00000172403 | SYNPO2   | -2.3393678   | 1.27E-18 |
| ENSG00000166317 | SYNPO2L  | 4.510877154  | 3.95E-11 |
| ENSG00000102003 | SYP      | -1.332114384 | 1.48E-05 |
| ENSG00000067715 | SYT1     | -2.138399781 | 2.06E-06 |
| ENSG00000204176 | SYT15    | -1.415093392 | 0.02443  |
| ENSG00000103528 | SYT17    | -1.939964293 | 4.94E-06 |
| ENSG00000129990 | SYT5     | 2.339991311  | 0.007693 |
| ENSG00000149043 | SYT8     | -1.28509011  | 0.005315 |
| ENSG00000170743 | SYT9     | -5.471719865 | 3.9E-08  |
| ENSG00000147526 | TACC1    | -1.467247484 | 1.03E-08 |
| ENSG00000013810 | TACC3    | 1.273987532  | 6.93E-06 |
| ENSG00000115353 | TACR1    | -1.790553368 | 6.78E-05 |
| ENSG00000075073 | TACR2    | -2.966276953 | 8.75E-06 |
| ENSG00000149591 | TAGLN    | -2.093386628 | 1.99E-11 |
| ENSG00000158710 | TAGLN2   | 1.237281827  | 2.16E-06 |
| ENSG00000144834 | TAGLN3   | 3.935005505  | 4.47E-05 |

|                 |         |              |          |
|-----------------|---------|--------------|----------|
| ENSG00000113407 | TARS    | 1.153762181  | 1.86E-06 |
| ENSG00000127364 | TAS2R4  | -1.817333359 | 9.11E-05 |
| ENSG00000166220 | TBATA   | -2.403463631 | 0.016195 |
| ENSG00000167291 | TBC1D16 | -1.059139564 | 0.00011  |
| ENSG00000095383 | TBC1D2  | 1.270758044  | 2.88E-06 |
| ENSG00000162065 | TBC1D24 | -1.461752285 | 1.62E-08 |
| ENSG00000274808 | TBC1D3B | 3.201921403  | 0.002615 |
| ENSG00000145979 | TBC1D7  | 1.139865817  | 3.03E-07 |
| ENSG00000109436 | TBC1D9  | -1.242306944 | 1.44E-08 |
| ENSG00000092607 | TBX15   | -2.518046911 | 6.28E-14 |
| ENSG00000112837 | TBX18   | -2.647239822 | 7.61E-15 |
| ENSG00000122145 | TBX22   | -3.313359182 | 0.001234 |
| ENSG00000135111 | TBX3    | -1.712238066 | 1.93E-11 |
| ENSG00000089225 | TBX5    | -2.012727129 | 0.007149 |
| ENSG00000059377 | TBXAS1  | 1.099925375  | 0.000956 |
| ENSG00000170379 | TCAF2   | 1.685418805  | 9.63E-08 |
| ENSG00000204219 | TCEA3   | -1.008419245 | 0.001944 |
| ENSG00000184905 | TCEAL2  | -3.3689979   | 1.09E-09 |
| ENSG00000196507 | TCEAL3  | -1.393764237 | 1.44E-09 |
| ENSG00000204065 | TCEAL5  | -2.385731854 | 0.005801 |
| ENSG00000204071 | TCEAL6  | -4.646325402 | 0.000631 |
| ENSG00000152284 | TCF7L1  | -1.538501852 | 3.51E-10 |
| ENSG00000148737 | TCF7L2  | -1.309667635 | 6.2E-07  |
| ENSG00000159450 | TCHH    | 2.539978894  | 0.002807 |
| ENSG00000134827 | TCN1    | 4.146963532  | 9.16E-11 |
| ENSG00000146221 | TCTE1   | -2.708004329 | 0.002369 |
| ENSG00000151790 | TDO2    | 2.737361903  | 3.86E-05 |
| ENSG00000162782 | TDRD5   | -2.48321167  | 0.002968 |
| ENSG00000197905 | TEAD4   | 1.670400078  | 1.27E-09 |
| ENSG00000109927 | TECTA   | -1.795903768 | 0.008265 |
| ENSG00000162062 | TEDC2   | 1.83568644   | 0.004345 |
| ENSG00000120156 | TEK     | -1.131382123 | 0.001196 |
| ENSG00000009694 | TENM1   | -3.329703229 | 1E-10    |
| ENSG00000145934 | TENM2   | 1.107774992  | 3.39E-07 |
| ENSG00000158246 | TENT5B  | 1.764205992  | 9.03E-10 |
| ENSG00000183508 | TENT5C  | -1.988537183 | 1.83E-08 |
| ENSG00000088992 | TESC    | -2.422086832 | 1.03E-06 |
| ENSG00000135426 | TESPA1  | -1.050562658 | 0.027524 |
| ENSG00000138336 | TET1    | -1.710357525 | 3.56E-06 |
| ENSG00000131126 | TEX101  | 4.720043483  | 2.76E-08 |
| ENSG00000133863 | TEX15   | 3.899178843  | 0.002865 |
| ENSG00000226174 | TEX22   | -2.052071146 | 0.047732 |
| ENSG00000153495 | TEX29   | 2.047138191  | 0.027523 |
| ENSG00000091513 | TF      | -2.377621783 | 5.59E-10 |
| ENSG00000008196 | TFAP2B  | -1.619352552 | 9.65E-08 |
| ENSG00000115112 | TFCP2L1 | -1.260976727 | 0.000389 |
| ENSG00000198176 | TFDP1   | 1.171346408  | 9.2E-11  |
| ENSG00000003436 | TFPI    | -1.271348545 | 0.00048  |



|                 |         |              |          |
|-----------------|---------|--------------|----------|
| ENSG00000105825 | TFPI2   | -2.74237768  | 5.13E-07 |
| ENSG00000042832 | TG      | -3.26762375  | 2.44E-13 |
| ENSG00000163235 | TGFA    | 1.241029197  | 0.000238 |
| ENSG00000105329 | TGFB1   | 1.009084476  | 0.000123 |
| ENSG00000140682 | TGFB11  | -1.102127664 | 5.98E-06 |
| ENSG00000163513 | TGFB2   | -1.152939528 | 4.21E-05 |
| ENSG00000069702 | TGFB3   | -2.02190659  | 4.06E-10 |
| ENSG00000092295 | TGM1    | 4.461982773  | 2.17E-26 |
| ENSG00000125780 | TGM3    | 3.53085275   | 3.82E-17 |
| ENSG00000163810 | TGM4    | 4.779473778  | 5.92E-08 |
| ENSG00000104055 | TGM5    | 1.827620356  | 1.14E-10 |
| ENSG00000166948 | TGM6    | 4.401834678  | 0.042282 |
| ENSG00000180176 | TH      | 5.326539404  | 2.61E-11 |
| ENSG00000173451 | THAP2   | 1.114986194  | 0.000227 |
| ENSG00000178726 | THBD    | 1.58394404   | 2.82E-14 |
| ENSG00000186340 | THBS2   | 1.014002512  | 0.000376 |
| ENSG00000113296 | THBS4   | -1.474532456 | 0.002844 |
| ENSG00000196407 | THEM5   | 3.554235237  | 5.28E-22 |
| ENSG00000126351 | THRA    | -1.385272577 | 5.48E-12 |
| ENSG00000151365 | THRSP   | -4.137597003 | 1.07E-09 |
| ENSG00000005108 | THSD7A  | -1.431064091 | 0.000152 |
| ENSG00000144229 | THSD7B  | -2.495127395 | 0.000179 |
| ENSG00000156299 | TIAM1   | 1.261608065  | 3.88E-13 |
| ENSG00000140534 | TICRR   | 2.236287039  | 4.55E-10 |
| ENSG00000078237 | TIGAR   | 1.768269455  | 5.21E-08 |
| ENSG00000140993 | TIGD7   | -1.559711325 | 3.42E-10 |
| ENSG00000099800 | TIMM13  | 1.336047856  | 1.35E-06 |
| ENSG00000126953 | TIMM8A  | 1.111576674  | 2.66E-05 |
| ENSG00000150779 | TIMM8B  | 1.121609816  | 1.4E-05  |
| ENSG00000035862 | TIMP2   | -1.440332711 | 5.98E-07 |
| ENSG00000100234 | TIMP3   | -2.812571117 | 5.46E-17 |
| ENSG00000157150 | TIMP4   | -2.9173904   | 8.54E-19 |
| ENSG00000142910 | TINAGL1 | -1.900246347 | 9.26E-15 |
| ENSG00000167900 | TK1     | 1.65634667   | 8.68E-07 |
| ENSG00000166548 | TK2     | -1.34747136  | 7.5E-08  |
| ENSG00000007350 | TKTL1   | 2.750751388  | 0.007172 |
| ENSG00000140950 | TLDC1   | 1.417612894  | 1.97E-10 |
| ENSG00000065717 | TLE2    | -2.442949267 | 1.97E-19 |
| ENSG00000140332 | TLE3    | 1.073593706  | 2.41E-06 |
| ENSG00000104953 | TLE6    | -2.395977261 | 0.005801 |
| ENSG00000038295 | TLL1    | -1.297002934 | 0.000289 |
| ENSG00000095587 | TLL2    | 3.863701187  | 0.000139 |
| ENSG00000171914 | TLN2    | -2.141926983 | 1.02E-11 |
| ENSG00000163762 | TM4SF18 | -1.012223682 | 0.006398 |
| ENSG00000145107 | TM4SF19 | 4.412886639  | 1.66E-10 |
| ENSG00000149809 | TM7SF2  | 1.032709627  | 0.000116 |
| ENSG00000149488 | TMC2    | -3.546079492 | 0.015386 |
| ENSG00000167608 | TMC4    | -1.920507053 | 9.36E-06 |



|                 |          |              |          |
|-----------------|----------|--------------|----------|
| ENSG00000162542 | TMCO4    | -1.177628106 | 9.45E-08 |
| ENSG00000166292 | TMEM100  | -1.390740593 | 0.00019  |
| ENSG00000185332 | TMEM105  | 2.609129163  | 1.93E-06 |
| ENSG00000184988 | TMEM106A | -1.269558117 | 0.00021  |
| ENSG00000144868 | TMEM108  | -2.98380803  | 1.1E-08  |
| ENSG00000139173 | TMEM117  | 1.941080264  | 5.1E-13  |
| ENSG00000179178 | TMEM125  | 1.501708373  | 1.67E-05 |
| ENSG00000166448 | TMEM130  | -3.144616379 | 1.4E-07  |
| ENSG00000139364 | TMEM132B | -1.038488172 | 0.015788 |
| ENSG00000181234 | TMEM132C | -4.167009217 | 2.71E-15 |
| ENSG00000151952 | TMEM132D | 2.805534461  | 0.0258   |
| ENSG00000181291 | TMEM132E | -2.809850938 | 0.031894 |
| ENSG00000181264 | TMEM136  | -1.058810521 | 0.006058 |
| ENSG00000178826 | TMEM139  | -2.021043962 | 4.43E-14 |
| ENSG00000146859 | TMEM140  | -1.091130795 | 0.002825 |
| ENSG00000249242 | TMEM150C | -1.798284817 | 4.86E-07 |
| ENSG00000170006 | TMEM154  | 1.613573505  | 3.04E-11 |
| ENSG00000134851 | TMEM165  | 1.091292884  | 4.56E-06 |
| ENSG00000163449 | TMEM169  | -1.175874876 | 0.000825 |
| ENSG00000205269 | TMEM170B | -1.196310868 | 0.002912 |
| ENSG00000002933 | TMEM176A | -1.355409908 | 0.011227 |
| ENSG00000106565 | TMEM176B | -1.689383376 | 1.73E-06 |
| ENSG00000152154 | TMEM178A | -2.218064936 | 6.53E-07 |
| ENSG00000261115 | TMEM178B | -2.364059261 | 5.29E-07 |
| ENSG00000164855 | TMEM184A | 1.130657896  | 1.78E-06 |
| ENSG00000206432 | TMEM200C | -3.075165634 | 8.18E-08 |
| ENSG00000065600 | TMEM206  | 1.814903207  | 6.18E-05 |
| ENSG00000168701 | TMEM208  | 1.004421433  | 6.04E-06 |
| ENSG00000206069 | TMEM211  | -2.154174728 | 0.01716  |
| ENSG00000214128 | TMEM213  | -2.664555237 | 0.000439 |
| ENSG00000187824 | TMEM220  | -1.077459212 | 8.42E-05 |
| ENSG00000263429 | TMEM238L | 3.483436131  | 0.023082 |
| ENSG00000134490 | TMEM241  | 1.445971258  | 4.53E-07 |
| ENSG00000149582 | TMEM25   | -1.466081403 | 1.04E-07 |
| ENSG00000125355 | TMEM255A | -1.18482661  | 0.009304 |
| ENSG00000169758 | TMEM266  | -1.627747609 | 9.24E-05 |
| ENSG00000204161 | TMEM273  | -1.052289648 | 0.000577 |
| ENSG00000126950 | TMEM35A  | -2.543525347 | 0.001125 |
| ENSG00000171227 | TMEM37   | -1.315240942 | 0.000649 |
| ENSG00000072954 | TMEM38A  | -1.377034047 | 2.91E-05 |
| ENSG00000088726 | TMEM40   | 2.558691876  | 2.99E-20 |
| ENSG00000181458 | TMEM45A  | 2.478602142  | 5.22E-18 |
| ENSG00000151715 | TMEM45B  | 2.955916083  | 1.59E-23 |
| ENSG00000147027 | TMEM47   | -2.255532249 | 8.1E-15  |
| ENSG00000121900 | TMEM54   | 2.421742211  | 2.12E-15 |
| ENSG00000152078 | TMEM56   | -2.619272882 | 2.54E-12 |
| ENSG00000163472 | TMEM79   | 2.416137296  | 1.96E-20 |
| ENSG00000151117 | TMEM86A  | 2.82726455   | 9.67E-20 |

|                 |           |              |          |
|-----------------|-----------|--------------|----------|
| ENSG00000137103 | TMEM8B    | -2.281337195 | 6.52E-17 |
| ENSG00000121933 | TMIGD3    | 2.515534433  | 0.00212  |
| ENSG00000136842 | TMOD1     | -2.723907657 | 6.54E-19 |
| ENSG00000187054 | TMPRSS11A | 5.094826518  | 0.002648 |
| ENSG00000153802 | TMPRSS11D | 7.097023852  | 1.87E-17 |
| ENSG00000198092 | TMPRSS11F | 1.569390618  | 0.00029  |
| ENSG00000186452 | TMPRSS12  | 1.971020149  | 0.048486 |
| ENSG00000137747 | TMPRSS13  | 2.24094214   | 1.92E-12 |
| ENSG00000184012 | TMPRSS2   | -3.263738985 | 1.61E-06 |
| ENSG00000160183 | TMPRSS3   | -2.614171071 | 5.19E-07 |
| ENSG00000137648 | TMPRSS4   | 4.497066241  | 6.74E-11 |
| ENSG00000187045 | TMPRSS6   | -3.735858569 | 5.52E-11 |
| ENSG00000133687 | TMTC1     | -1.707656709 | 6.72E-18 |
| ENSG00000125827 | TMX4      | -1.138010195 | 2.53E-09 |
| ENSG00000109079 | TNFAIP1   | 1.115714798  | 1.21E-06 |
| ENSG00000185215 | TNFAIP2   | -1.086451893 | 0.000227 |
| ENSG00000183578 | TNFAIP8L3 | 1.921556645  | 1.38E-08 |
| ENSG00000173535 | TNFRSF10C | 2.349710185  | 0.014428 |
| ENSG00000164761 | TNFRSF11B | -1.306650875 | 0.008051 |
| ENSG00000006327 | TNFRSF12A | 1.536894529  | 7.05E-07 |
| ENSG00000157873 | TNFRSF14  | -1.052628801 | 0.000589 |
| ENSG00000146072 | TNFRSF21  | 1.841102456  | 5.18E-06 |
| ENSG00000120949 | TNFRSF8   | -1.036506908 | 0.048976 |
| ENSG00000049249 | TNFRSF9   | 2.420098163  | 0.008688 |
| ENSG00000239697 | TNFSF12   | -2.018292103 | 9.98E-16 |
| ENSG00000125657 | TNFSF9    | 1.808778974  | 0.004245 |
| ENSG00000154310 | TNIK      | -1.334392728 | 0.000535 |
| ENSG00000050730 | TNIP3     | 1.99821195   | 0.016678 |
| ENSG00000000005 | TNMD      | -4.877569687 | 2.5E-21  |
| ENSG00000120332 | TNN       | -2.262074455 | 0.000335 |
| ENSG00000114854 | TNNC1     | -1.739879759 | 0.008037 |
| ENSG00000130598 | TNNI2     | -1.811765689 | 0.004048 |
| ENSG00000105048 | TNNT1     | 1.343672943  | 3.87E-06 |
| ENSG00000130595 | TNNT3     | -1.591236271 | 0.000269 |
| ENSG00000078687 | TNRC6C    | -1.504479281 | 3.03E-07 |
| ENSG00000079308 | TNS1      | -2.418148456 | 3.63E-15 |
| ENSG00000111077 | TNS2      | -2.242808566 | 1.76E-16 |
| ENSG00000136205 | TNS3      | -1.819043216 | 3.44E-12 |
| ENSG00000168477 | TNXB      | -2.447151214 | 2.47E-08 |
| ENSG00000189350 | TOGARAM2  | -2.15481529  | 3.67E-05 |
| ENSG00000078902 | TOLLIP    | 1.092892009  | 5.32E-05 |
| ENSG00000198113 | TOR4A     | 1.77213068   | 1.32E-05 |
| ENSG00000124191 | TOX2      | -1.153659456 | 0.04658  |
| ENSG00000103460 | TOX3      | -3.218040907 | 8.82E-07 |
| ENSG00000115129 | TP53I3    | 1.56749445   | 1.32E-10 |
| ENSG00000124251 | TP53TG5   | -2.462883663 | 0.019498 |
| ENSG00000073282 | TP63      | 1.307422002  | 1.02E-08 |
| ENSG00000146242 | TPBG      | 2.064056624  | 4.1E-43  |

|                 |          |              |          |
|-----------------|----------|--------------|----------|
| ENSG00000129167 | TPH1     | -1.574101093 | 0.000148 |
| ENSG00000111669 | TPI1     | 1.467421192  | 8.1E-10  |
| ENSG00000140416 | TPM1     | -1.308827026 | 7.02E-08 |
| ENSG00000198467 | TPM2     | -2.103863368 | 1.31E-11 |
| ENSG00000167460 | TPM4     | 1.207642071  | 3.47E-06 |
| ENSG00000115705 | TPO      | -1.436250001 | 0.034684 |
| ENSG00000171368 | TPPP     | -2.197319368 | 8.33E-08 |
| ENSG00000172236 | TPSAB1   | -1.737124235 | 8.56E-06 |
| ENSG00000197253 | TPSB2    | -1.961235289 | 5.19E-06 |
| ENSG00000088325 | TPX2     | 1.862529805  | 1.33E-09 |
| ENSG00000186854 | TRABD2A  | -1.360719353 | 0.000701 |
| ENSG00000056972 | TRAF3IP2 | 1.047461073  | 2.39E-06 |
| ENSG00000009790 | TRAF3IP3 | -1.035413776 | 0.011247 |
| ENSG00000211870 | TRAJ19   | -1.569742916 | 0.018054 |
| ENSG00000211858 | TRAJ31   | -2.885072797 | 2.45E-07 |
| ENSG00000115993 | TRAK2    | -1.06884104  | 4.05E-09 |
| ENSG00000184811 | TRARG1   | -5.44225754  | 3.76E-08 |
| ENSG00000211829 | TRDC     | -1.773548056 | 0.01473  |
| ENSG00000186439 | TRDN     | -4.765588415 | 2.01E-07 |
| ENSG00000124731 | TREM1    | 2.255207743  | 0.0472   |
| ENSG00000112195 | TREML2   | 4.18021071   | 2.07E-05 |
| ENSG00000183479 | TREX2    | 2.653448481  | 1.82E-12 |
| ENSG00000072657 | TRHDE    | -1.925196423 | 3.04E-06 |
| ENSG00000101255 | TRIB3    | 1.305241788  | 3.7E-07  |
| ENSG00000255690 | TRIL     | -1.269784887 | 0.000133 |
| ENSG00000204613 | TRIM10   | 1.985146515  | 0.001296 |
| ENSG00000106785 | TRIM14   | 1.099227136  | 1.42E-05 |
| ENSG00000204610 | TRIM15   | 3.827840575  | 0.000302 |
| ENSG00000221926 | TRIM16   | 1.32625688   | 2E-07    |
| ENSG00000109654 | TRIM2    | -1.379420969 | 1.79E-06 |
| ENSG00000137699 | TRIM29   | 1.266717734  | 1.41E-07 |
| ENSG00000134253 | TRIM45   | -1.233832826 | 0.000113 |
| ENSG00000183718 | TRIM52   | -1.284872133 | 1.22E-06 |
| ENSG00000147573 | TRIM55   | -3.186113816 | 0.001707 |
| ENSG00000213186 | TRIM59   | 1.180979242  | 1.39E-07 |
| ENSG00000116525 | TRIM62   | 1.538970476  | 2.19E-11 |
| ENSG00000146054 | TRIM7    | 1.062336325  | 4.19E-07 |
| ENSG00000177238 | TRIM72   | 2.38237358   | 2.98E-06 |
| ENSG00000171206 | TRIM8    | -1.229788521 | 6.45E-08 |
| ENSG00000100505 | TRIM9    | -1.794001463 | 0.001075 |
| ENSG00000179046 | TRIML2   | 3.409186641  | 0.004041 |
| ENSG00000071539 | TRIP13   | 1.628958193  | 4.78E-06 |
| ENSG00000250305 | TRMT9B   | -1.805762719 | 5.89E-06 |
| ENSG00000135451 | TROAP    | 1.25672557   | 8.84E-05 |
| ENSG00000144935 | TRPC1    | -1.557400149 | 1.34E-06 |
| ENSG00000142185 | TRPM2    | -1.196214504 | 0.034093 |
| ENSG00000083067 | TRPM3    | -3.616998254 | 3.99E-06 |
| ENSG00000167723 | TRPV3    | 1.991257843  | 3.9E-20  |

|                 |         |              |          |
|-----------------|---------|--------------|----------|
| ENSG00000165125 | TRPV6   | -1.440953792 | 0.000482 |
| ENSG00000163467 | TSACC   | 2.430387197  | 0.027896 |
| ENSG00000157514 | TSC22D3 | -1.695229844 | 1E-10    |
| ENSG00000117472 | TSPAN1  | -1.917494447 | 1E-06    |
| ENSG00000106025 | TSPAN12 | -1.664598629 | 2.17E-08 |
| ENSG00000099282 | TSPAN15 | -1.705929562 | 2.52E-11 |
| ENSG00000048140 | TSPAN17 | 1.089447707  | 7.32E-05 |
| ENSG00000157570 | TSPAN18 | -1.542771713 | 6.02E-07 |
| ENSG00000134198 | TSPAN2  | -1.398121394 | 5.82E-09 |
| ENSG00000064201 | TSPAN32 | -2.042068375 | 0.015039 |
| ENSG00000214063 | TSPAN4  | -1.196625059 | 8.04E-09 |
| ENSG00000168785 | TSPAN5  | 1.423843314  | 8.11E-13 |
| ENSG00000156298 | TSPAN7  | -2.222441244 | 2.17E-12 |
| ENSG00000127324 | TSPAN8  | -3.54722246  | 4.5E-13  |
| ENSG00000175894 | TSPEAR  | -2.741315816 | 2.66E-05 |
| ENSG00000005379 | TSPOAP1 | -1.803249091 | 6.56E-07 |
| ENSG00000184205 | TSPYL2  | -1.628516406 | 8.15E-10 |
| ENSG00000180543 | TSPYL5  | -1.517390786 | 1.59E-13 |
| ENSG00000104522 | TSTA3   | 1.499180251  | 1.47E-08 |
| ENSG00000128881 | TTBK2   | -1.041787838 | 9.87E-07 |
| ENSG00000163728 | TTC14   | -1.115797296 | 0.000653 |
| ENSG00000123607 | TTC21B  | -1.036017255 | 6.7E-05  |
| ENSG00000006555 | TTC22   | 2.09316333   | 1.51E-17 |
| ENSG00000205838 | TTC23L  | -1.719270658 | 0.03246  |
| ENSG00000204815 | TTC25   | -1.383433991 | 0.017937 |
| ENSG00000100154 | TTC28   | -1.677323047 | 6.68E-09 |
| ENSG00000215912 | TTC34   | -2.309223948 | 0.00036  |
| ENSG00000172425 | TTC36   | -2.677355802 | 0.03593  |
| ENSG00000085831 | TTC39A  | 2.663004768  | 4.21E-25 |
| ENSG00000155158 | TTC39B  | 1.147437619  | 8.86E-08 |
| ENSG00000139865 | TTC6    | -3.410768223 | 4.22E-05 |
| ENSG00000133985 | TTC9    | 1.64993292   | 6.13E-06 |
| ENSG00000112742 | TTK     | 1.842017575  | 1.31E-07 |
| ENSG00000100304 | TTLL12  | 1.148420905  | 2.6E-11  |
| ENSG00000214021 | TTLL3   | -1.130594221 | 0.002147 |
| ENSG00000137941 | TTLL7   | -1.216546041 | 1.02E-05 |
| ENSG00000155657 | TTN     | -1.867293573 | 9.62E-05 |
| ENSG00000137561 | TTPA    | -3.395172102 | 2.3E-08  |
| ENSG00000124120 | TTPAL   | 1.018855511  | 2.79E-09 |
| ENSG00000167614 | TTYH1   | -3.00465312  | 1.06E-13 |
| ENSG00000166402 | TUB     | -1.245240229 | 9.31E-05 |
| ENSG00000167553 | TUBA1C  | 2.720772426  | 1.15E-15 |
| ENSG00000127824 | TUBA4A  | 2.552569301  | 3.84E-15 |
| ENSG00000101162 | TUBB1   | -2.709000236 | 0.001075 |
| ENSG00000137267 | TUBB2A  | 2.350975997  | 1.67E-08 |
| ENSG00000258947 | TUBB3   | 3.881211561  | 0.000354 |
| ENSG00000188229 | TUBB4B  | 1.075538774  | 0.000595 |
| ENSG00000176014 | TUBB6   | 1.060497461  | 0.001103 |

|                 |         |              |          |
|-----------------|---------|--------------|----------|
| ENSG00000131462 | TUBG1   | 1.443231218  | 4.63E-07 |
| ENSG00000143367 | TUFT1   | 1.051069976  | 5.68E-07 |
| ENSG00000151239 | TWF1    | 1.645712505  | 3.83E-08 |
| ENSG00000136810 | TXN     | 2.24488315   | 9.16E-19 |
| ENSG00000129235 | TXNDC17 | 1.877202827  | 7.3E-11  |
| ENSG00000115514 | TXNDC9  | 1.222704101  | 7.9E-06  |
| ENSG00000265972 | TXNIP   | -1.910196073 | 8.79E-18 |
| ENSG00000025708 | TYMP    | 2.169689946  | 8.39E-16 |
| ENSG00000176890 | TYMS    | 1.096689399  | 0.00022  |
| ENSG00000077498 | TYR     | 1.403688355  | 0.000413 |
| ENSG00000107165 | TYRP1   | 1.043598594  | 0.01007  |
| ENSG00000185262 | UBALD2  | 1.361020855  | 1.04E-09 |
| ENSG00000246922 | UBAP1L  | -1.447440537 | 0.000353 |
| ENSG00000154127 | UBASH3B | 2.300391408  | 4.92E-16 |
| ENSG00000175063 | UBE2C   | 1.775958013  | 7.18E-07 |
| ENSG00000132388 | UBE2G1  | 1.099128754  | 2.96E-05 |
| ENSG00000177889 | UBE2N   | 1.089371724  | 0.000173 |
| ENSG00000108106 | UBE2S   | 1.391203591  | 0.000228 |
| ENSG00000077152 | UBE2T   | 1.128147256  | 0.003764 |
| ENSG00000154277 | UCHL1   | -1.6091106   | 0.000136 |
| ENSG00000118939 | UCHL3   | 1.675150053  | 7.24E-14 |
| ENSG00000143179 | UCK2    | 1.162140244  | 1.55E-07 |
| ENSG00000148154 | UGCG    | 1.453847336  | 2.66E-09 |
| ENSG00000244122 | UGT1A7  | 3.313080929  | 2.88E-10 |
| ENSG00000173610 | UGT2A1  | -2.143095657 | 0.023954 |
| ENSG00000171234 | UGT2B7  | -3.446743836 | 0.000455 |
| ENSG00000168671 | UGT3A2  | -2.463443552 | 0.001534 |
| ENSG00000174607 | UGT8    | -2.122728044 | 1.66E-06 |
| ENSG00000276043 | UHRF1   | 1.83180526   | 2.48E-08 |
| ENSG00000111981 | ULBP1   | 4.502804561  | 4.72E-08 |
| ENSG00000131015 | ULBP2   | 6.048579071  | 4.24E-19 |
| ENSG00000131019 | ULBP3   | 3.298586958  | 6.38E-06 |
| ENSG00000177398 | UMODL1  | -2.996542809 | 0.019392 |
| ENSG00000137766 | UNC13C  | -3.339462629 | 1.12E-08 |
| ENSG00000107731 | UNC5B   | 1.108864287  | 1.63E-08 |
| ENSG00000182168 | UNC5C   | -2.217291526 | 2.43E-09 |
| ENSG00000144406 | UNC80   | -2.329442735 | 0.00346  |
| ENSG00000112494 | UNC93A  | 4.071738425  | 4.61E-11 |
| ENSG00000100024 | UPB1    | -2.071785585 | 0.000342 |
| ENSG00000105668 | UPK1A   | 1.92650659   | 0.02106  |
| ENSG00000243566 | UPK3B   | -1.684530901 | 0.000139 |
| ENSG00000183696 | UPP1    | 2.411964955  | 1.01E-07 |
| ENSG00000103005 | USB1    | 1.075502349  | 7.32E-06 |
| ENSG00000182040 | USH1G   | 2.321606422  | 7.8E-11  |
| ENSG00000130307 | USHBP1  | -1.21092354  | 0.00503  |
| ENSG00000058056 | USP13   | -1.27071897  | 3.1E-07  |
| ENSG00000036672 | USP2    | 2.513769838  | 1.02E-10 |
| ENSG00000170185 | USP38   | 1.026341029  | 0.000505 |

|                 |         |              |          |
|-----------------|---------|--------------|----------|
| ENSG00000136014 | USP44   | -1.986802648 | 7.98E-09 |
| ENSG00000247746 | USP51   | -1.551268958 | 4.97E-06 |
| ENSG00000129204 | USP6    | -2.033646283 | 0.044324 |
| ENSG00000183520 | UTP11   | 1.20341904   | 1.57E-07 |
| ENSG00000118640 | VAMP8   | 1.206915085  | 2.53E-05 |
| ENSG00000171724 | VAT1L   | -1.751219555 | 2.12E-05 |
| ENSG00000116035 | VAX2    | -1.645466853 | 0.007023 |
| ENSG00000162692 | VCAM1   | -1.401532856 | 4.25E-07 |
| ENSG00000165280 | VCP     | 1.046527682  | 9.33E-05 |
| ENSG00000165197 | VEGFD   | -2.808750127 | 0.001532 |
| ENSG00000128564 | VGf     | 4.435763864  | 5.32E-05 |
| ENSG00000206538 | VGLL3   | -2.243870085 | 2.33E-12 |
| ENSG00000026025 | VIM     | -1.306191609 | 7.35E-06 |
| ENSG00000106018 | VIPR2   | -1.760316636 | 0.003015 |
| ENSG00000167397 | VKORC1  | 1.019070493  | 0.001198 |
| ENSG00000062716 | VMP1    | 1.288319718  | 2.38E-09 |
| ENSG00000178201 | VN1R1   | -1.230627321 | 0.035269 |
| ENSG00000093134 | VNN3    | 6.457205902  | 4.33E-07 |
| ENSG00000129003 | VPS13C  | -1.005850804 | 7.36E-07 |
| ENSG00000176428 | VPS37D  | -1.059535404 | 0.049239 |
| ENSG00000101842 | VSIG1   | 2.808204718  | 2.02E-06 |
| ENSG00000186806 | VSIG10L | 1.787076089  | 1.39E-08 |
| ENSG00000019102 | VSIG2   | -1.124561007 | 0.011056 |
| ENSG00000163032 | VSNL1   | 1.750697218  | 6.18E-10 |
| ENSG00000132821 | VSTM2L  | -1.08496858  | 0.047941 |
| ENSG00000134258 | VTCN1   | -2.640112592 | 1.28E-07 |
| ENSG00000165816 | VWA2    | -1.010913132 | 0.000109 |
| ENSG00000175267 | VWA3A   | 3.726066158  | 3.63E-10 |
| ENSG00000188730 | VWC2    | 1.010465288  | 0.0122   |
| ENSG00000146530 | VWDE    | -1.805275989 | 0.036952 |
| ENSG00000110799 | VWF     | -1.33985571  | 3.89E-07 |
| ENSG00000169085 | VXN     | -2.098157615 | 0.026163 |
| ENSG00000132970 | WASF3   | -1.638535446 | 2.8E-10  |
| ENSG00000183066 | WBP2NL  | -1.768021951 | 5.34E-07 |
| ENSG00000143951 | WDPCP   | -1.306678434 | 4.1E-07  |
| ENSG00000150627 | WDR17   | -2.248520881 | 9.89E-05 |
| ENSG00000118965 | WDR35   | -1.021559496 | 3.58E-07 |
| ENSG00000160193 | WDR4    | 1.091318333  | 1.46E-07 |
| ENSG00000185798 | WDR53   | 1.747021828  | 5.34E-13 |
| ENSG00000126870 | WDR60   | -1.241602113 | 9.27E-06 |
| ENSG00000075702 | WDR62   | 2.063688218  | 1.76E-10 |
| ENSG00000158023 | WDR66   | 2.236127708  | 3.18E-09 |
| ENSG00000166415 | WDR72   | -2.918234882 | 5.5E-11  |
| ENSG00000116455 | WDR77   | 1.106793917  | 0.000335 |
| ENSG00000152763 | WDR78   | -1.289268718 | 3.12E-05 |
| ENSG00000187260 | WDR86   | -2.292542072 | 0.006916 |
| ENSG00000182931 | WFDC10B | -3.654970084 | 4.31E-05 |
| ENSG00000168703 | WFDC12  | 6.226022809  | 8.07E-19 |

|                 |          |              |          |
|-----------------|----------|--------------|----------|
| ENSG00000101443 | WFDC2    | -1.717940304 | 0.002147 |
| ENSG00000124116 | WFDC3    | -2.586875537 | 4.03E-07 |
| ENSG00000175121 | WFDC5    | 1.417071323  | 1.67E-06 |
| ENSG00000127578 | WFIKKN1  | -2.009064997 | 5.05E-05 |
| ENSG00000173714 | WFIKKN2  | -4.696031932 | 1.16E-11 |
| ENSG00000109501 | WFS1     | -1.475336271 | 2.06E-09 |
| ENSG00000095397 | WHRN     | -1.469019306 | 4.67E-07 |
| ENSG00000156076 | WIF1     | -4.257704996 | 1.1E-10  |
| ENSG00000122574 | WIPF3    | -1.236391366 | 7.13E-06 |
| ENSG00000064205 | WISP2    | -2.715703467 | 5.37E-09 |
| ENSG00000165238 | WNK2     | -3.144534316 | 7.13E-11 |
| ENSG00000085741 | WNT11    | -1.817106599 | 3.47E-08 |
| ENSG00000105989 | WNT2     | -1.359046311 | 0.020434 |
| ENSG00000114251 | WNT5A    | 2.580572715  | 3.83E-22 |
| ENSG00000111186 | WNT5B    | -1.271646535 | 0.000609 |
| ENSG00000115596 | WNT6     | -2.223683718 | 0.002084 |
| ENSG00000154764 | WNT7A    | 2.860761822  | 1.42E-12 |
| ENSG00000179314 | WSCD1    | -2.837829977 | 1.33E-14 |
| ENSG00000075035 | WSCD2    | -1.805040576 | 0.000605 |
| ENSG00000142279 | WTIP     | -1.456298575 | 4.31E-07 |
| ENSG00000173578 | XCR1     | 1.275051005  | 0.023235 |
| ENSG00000124343 | XG       | 1.098768024  | 3.41E-06 |
| ENSG00000047597 | XK       | 1.20343351   | 0.022608 |
| ENSG00000206579 | XKR4     | -3.417447629 | 1.69E-08 |
| ENSG00000182489 | XKRX     | 2.93192363   | 2.62E-11 |
| ENSG00000154767 | XPC      | -1.121019487 | 2.6E-06  |
| ENSG00000122121 | XPNPEP2  | -1.766883132 | 9.08E-05 |
| ENSG00000134684 | YARS     | 1.299527817  | 3.43E-10 |
| ENSG00000006047 | YBX2     | -2.912362269 | 3.77E-13 |
| ENSG00000250067 | YJEFN3   | -1.266547088 | 0.01511  |
| ENSG00000106636 | YKT6     | 1.073474561  | 1.48E-05 |
| ENSG00000180667 | YOD1     | 2.693676301  | 1.18E-14 |
| ENSG00000100027 | YPEL1    | -2.081560528 | 2.22E-09 |
| ENSG00000166793 | YPEL4    | -1.032916092 | 0.018793 |
| ENSG00000134308 | YWHAQ    | 1.265844221  | 7.36E-05 |
| ENSG00000164924 | YWHAZ    | 1.733198337  | 1.14E-09 |
| ENSG00000225528 | Z82206.1 | -1.089597312 | 0.028323 |
| ENSG00000146839 | ZAN      | 2.817793625  | 0.000173 |
| ENSG00000115085 | ZAP70    | -1.326719811 | 0.002196 |
| ENSG00000177494 | ZBED2    | 3.195725299  | 8.34E-20 |
| ENSG00000132846 | ZBED3    | -1.627826426 | 8.64E-09 |
| ENSG00000100426 | ZBED4    | 1.029568292  | 7.75E-07 |
| ENSG00000188707 | ZBED6CL  | 2.186597971  | 1.85E-07 |
| ENSG00000205189 | ZBTB10   | -2.201888399 | 1.05E-08 |
| ENSG00000109906 | ZBTB16   | -3.935788436 | 1.96E-17 |
| ENSG00000181722 | ZBTB20   | -1.818155626 | 1.65E-07 |
| ENSG00000114853 | ZBTB47   | -1.203833431 | 1.77E-07 |
| ENSG00000163874 | ZC3H12A  | 1.478949614  | 2.52E-07 |



|                 |          |              |          |
|-----------------|----------|--------------|----------|
| ENSG00000102053 | ZC3H12B  | -2.790628831 | 3.18E-05 |
| ENSG00000188177 | ZC3H6    | -1.857936194 | 7.5E-09  |
| ENSG00000165424 | ZCCHC24  | -1.376533607 | 1.03E-07 |
| ENSG00000078487 | ZCWPW1   | -1.89583269  | 1.93E-09 |
| ENSG00000188818 | ZDHHC11  | -2.95064013  | 7.24E-14 |
| ENSG00000206077 | ZDHHC11B | -3.600559169 | 3.08E-09 |
| ENSG00000102383 | ZDHHC15  | -2.089803178 | 4.7E-11  |
| ENSG00000104219 | ZDHHC2   | -1.643452336 | 7.99E-14 |
| ENSG00000180776 | ZDHHC20  | 1.066674913  | 2.07E-05 |
| ENSG00000175893 | ZDHHC21  | 1.32192202   | 5.47E-07 |
| ENSG00000156599 | ZDHHC5   | 1.008668721  | 1.43E-06 |
| ENSG00000148516 | ZEB1     | -1.510192506 | 1.01E-05 |
| ENSG00000169554 | ZEB2     | -1.536894401 | 1.72E-06 |
| ENSG00000140836 | ZFH3     | -1.106598953 | 3.39E-05 |
| ENSG00000091656 | ZFH4     | -2.246113706 | 2.65E-08 |
| ENSG00000142065 | ZFP14    | -1.58853027  | 1.46E-06 |
| ENSG00000198939 | ZFP2     | -1.804770962 | 3.26E-06 |
| ENSG00000196867 | ZFP28    | -1.668164507 | 4.56E-20 |
| ENSG00000128016 | ZFP36    | 1.589662751  | 2.32E-08 |
| ENSG00000136866 | ZFP37    | -1.145949169 | 0.010233 |
| ENSG00000179059 | ZFP42    | 4.283882399  | 0.000227 |
| ENSG00000181007 | ZFP82    | -1.346687636 | 6.86E-05 |
| ENSG00000169946 | ZFPM2    | -1.879766582 | 9.22E-05 |
| ENSG00000152977 | ZIC1     | -2.009646732 | 0.000196 |
| ENSG00000174963 | ZIC4     | -2.389638032 | 1.67E-06 |
| ENSG00000171649 | ZIK1     | -1.604330871 | 1.59E-07 |
| ENSG00000166432 | ZMAT1    | -2.91485723  | 1.14E-12 |
| ENSG00000066185 | ZMYND12  | -1.582258278 | 0.000501 |
| ENSG00000256223 | ZNF10    | -1.027892879 | 0.002315 |
| ENSG00000176293 | ZNF135   | -2.563018898 | 1.82E-11 |
| ENSG00000196646 | ZNF136   | -1.062015696 | 4.98E-06 |
| ENSG00000105708 | ZNF14    | -1.022165676 | 1.45E-05 |
| ENSG00000179909 | ZNF154   | -1.164224531 | 0.021016 |
| ENSG00000197279 | ZNF165   | 1.265787616  | 4.57E-05 |
| ENSG00000147394 | ZNF185   | 1.850759493  | 8.87E-07 |
| ENSG00000149050 | ZNF214   | -1.374862147 | 0.009074 |
| ENSG00000149054 | ZNF215   | 1.700217349  | 0.003748 |
| ENSG00000196793 | ZNF239   | -1.145969427 | 0.028664 |
| ENSG00000175395 | ZNF25    | -1.301926502 | 7.68E-11 |
| ENSG00000198039 | ZNF273   | -1.362065931 | 0.000813 |
| ENSG00000063587 | ZNF275   | -1.125660861 | 8.23E-07 |
| ENSG00000089335 | ZNF302   | -1.13394927  | 4.25E-05 |
| ENSG00000171467 | ZNF318   | -1.012592769 | 0.000397 |
| ENSG00000130844 | ZNF331   | -1.101432031 | 3.38E-07 |
| ENSG00000198185 | ZNF334   | -1.073327333 | 0.032444 |
| ENSG00000197937 | ZNF347   | -1.251751411 | 2.36E-11 |
| ENSG00000177932 | ZNF354C  | -1.168408704 | 3.82E-05 |
| ENSG00000198816 | ZNF358   | -1.273765215 | 2.55E-06 |

|                 |         |              |          |
|-----------------|---------|--------------|----------|
| ENSG00000161298 | ZNF382  | -1.451192103 | 5.94E-05 |
| ENSG00000144331 | ZNF385B | -1.469398448 | 0.005207 |
| ENSG00000187595 | ZNF385C | -1.873233806 | 0.000178 |
| ENSG00000151789 | ZNF385D | -2.0707419   | 3.19E-08 |
| ENSG00000124613 | ZNF391  | -1.027618805 | 0.000931 |
| ENSG00000186496 | ZNF396  | -1.262386443 | 0.0089   |
| ENSG00000170954 | ZNF415  | -1.727607478 | 9.02E-14 |
| ENSG00000196724 | ZNF418  | -1.547010577 | 2.87E-07 |
| ENSG00000102935 | ZNF423  | -1.882915574 | 2.06E-08 |
| ENSG00000197013 | ZNF429  | -1.088267466 | 1.16E-05 |
| ENSG00000198521 | ZNF43   | -1.672670984 | 5.85E-10 |
| ENSG00000197044 | ZNF441  | -1.001470942 | 1.29E-07 |
| ENSG00000196263 | ZNF471  | -1.969701142 | 7.75E-12 |
| ENSG00000173258 | ZNF483  | -1.666589229 | 0.002398 |
| ENSG00000186446 | ZNF501  | -1.011550054 | 0.000163 |
| ENSG00000081665 | ZNF506  | -1.027722847 | 4.22E-05 |
| ENSG00000175322 | ZNF519  | -1.443272262 | 7.96E-07 |
| ENSG00000198795 | ZNF521  | -1.339777515 | 2.53E-05 |
| ENSG00000167555 | ZNF528  | -1.608982452 | 1.84E-10 |
| ENSG00000171817 | ZNF540  | -1.506221536 | 3.36E-05 |
| ENSG00000118156 | ZNF541  | -2.218309588 | 2.35E-06 |
| ENSG00000187187 | ZNF546  | -2.074094048 | 5.03E-07 |
| ENSG00000188321 | ZNF559  | -1.42652871  | 3.34E-10 |
| ENSG00000198453 | ZNF568  | -1.234220549 | 3.07E-10 |
| ENSG00000196437 | ZNF569  | -1.080743467 | 3.19E-06 |
| ENSG00000171970 | ZNF57   | 1.119461418  | 6.3E-06  |
| ENSG00000180938 | ZNF572  | -1.113153577 | 0.011976 |
| ENSG00000189144 | ZNF573  | -1.124313521 | 0.000648 |
| ENSG00000161551 | ZNF577  | -2.070725257 | 4.34E-12 |
| ENSG00000258405 | ZNF578  | -1.768663613 | 0.041134 |
| ENSG00000198440 | ZNF583  | -1.136282738 | 0.00092  |
| ENSG00000142684 | ZNF593  | 1.295233342  | 2.78E-05 |
| ENSG00000196458 | ZNF605  | -1.169576328 | 0.000436 |
| ENSG00000166704 | ZNF606  | -1.041474879 | 7.78E-06 |
| ENSG00000168916 | ZNF608  | -1.167880455 | 0.000468 |
| ENSG00000167554 | ZNF610  | -1.912450366 | 0.00017  |
| ENSG00000157657 | ZNF618  | -1.259904374 | 0.000315 |
| ENSG00000177842 | ZNF620  | -1.195727759 | 0.024669 |
| ENSG00000188171 | ZNF626  | -1.132495918 | 3.63E-05 |
| ENSG00000144792 | ZNF660  | -1.364240489 | 0.005845 |
| ENSG00000182983 | ZNF662  | 1.196941473  | 2.6E-13  |
| ENSG00000197497 | ZNF665  | -2.151767344 | 6.79E-10 |
| ENSG00000198046 | ZNF667  | -2.14070097  | 2.51E-07 |
| ENSG00000196109 | ZNF676  | -2.744113348 | 0.001207 |
| ENSG00000197928 | ZNF677  | -1.882955297 | 6.77E-16 |
| ENSG00000198429 | ZNF69   | -1.708064907 | 3.22E-05 |
| ENSG00000164684 | ZNF704  | -1.566026216 | 3.07E-06 |
| ENSG00000120963 | ZNF706  | 1.239220874  | 5.45E-13 |

|                 |         |              |          |
|-----------------|---------|--------------|----------|
| ENSG00000140548 | ZNF710  | 1.417608676  | 3.65E-12 |
| ENSG00000141579 | ZNF750  | 1.88679973   | 6.03E-10 |
| ENSG00000198146 | ZNF770  | 1.251140583  | 2.7E-09  |
| ENSG00000196381 | ZNF781  | -1.512309076 | 0.017931 |
| ENSG00000188227 | ZNF793  | -1.10323913  | 0.00082  |
| ENSG00000185869 | ZNF829  | -1.01177839  | 0.000336 |
| ENSG00000167766 | ZNF83   | -1.47896609  | 4.34E-09 |
| ENSG00000127903 | ZNF835  | -2.031001889 | 0.000691 |
| ENSG00000223547 | ZNF844  | -1.003418775 | 0.000196 |
| ENSG00000236609 | ZNF853  | -2.341450482 | 1.05E-10 |
| ENSG00000106479 | ZNF862  | -1.00755274  | 0.000537 |
| ENSG00000257446 | ZNF878  | 3.333548656  | 0.000275 |
| ENSG00000221923 | ZNF880  | -1.063221268 | 0.000593 |
| ENSG00000213988 | ZNF90   | -1.286689398 | 0.002162 |
| ENSG00000167232 | ZNF91   | -1.375644316 | 1.15E-08 |
| ENSG00000066379 | ZNRD1   | 1.091565556  | 3.74E-07 |
| ENSG00000180233 | ZNRF2   | 1.416142079  | 0.002111 |
| ENSG00000121413 | ZSCAN18 | -2.528092218 | 8.47E-15 |
| ENSG00000235109 | ZSCAN31 | 1.115230699  | 1.17E-06 |
| ENSG00000132003 | ZSWIM4  | 1.36177892   | 4.08E-09 |
| ENSG00000162415 | ZSWIM5  | -1.426213781 | 0.000116 |
| ENSG00000174442 | ZWILCH  | 1.107480747  | 2.82E-08 |
| ENSG00000122952 | ZWINT   | 1.717316395  | 4.56E-12 |
| ENSG00000203995 | ZYG11A  | 2.333163776  | 0.000317 |



Table S6: Full list of DEGs (adjusted P<0.05) in non-lesional PN (n=13) vs. matched healthy skin (n=13)

| GeneID          | GeneName | logFC (PN_Nonlesional / Healthy_Control) | padj   |
|-----------------|----------|------------------------------------------|--------|
| ENSG00000147614 | ATP6V0D2 | 4.256276934                              | 0.0006 |
| ENSG00000178789 | CD300LB  | 4.176017856                              | 0.0019 |
| ENSG00000133063 | CHIT1    | 3.947603422                              | 0.0064 |
| ENSG00000160883 | HK3      | 2.150003849                              | 0.0485 |
| ENSG00000243466 | IGKV1-5  | -6.05167934                              | 0.0019 |
| ENSG00000188581 | KRTAP1-1 | 12.37797291                              | 0.0456 |
| ENSG00000100985 | MMP9     | 2.767089015                              | 0.0049 |
| ENSG00000135094 | SDS      | 4.202139644                              | 0.0005 |
| ENSG00000165646 | SLC18A2  | -1.097278894                             | 0.001  |
| ENSG00000118785 | SPP1     | 3.749495416                              | 0.0099 |
| ENSG00000136011 | STAB2    | -3.421817801                             | 0.0001 |
| ENSG00000145107 | TM4SF19  | 3.669966075                              | 0.0005 |
| ENSG00000095970 | TREM2    | 2.725696691                              | 0.0001 |



Table S7: Full list of DEGs (adjusted P<0.05) in African American (n=10) compared to European American (n=3) PN lesional skin. Select immune genes (IL4, IL5, IL13, IL31) are also shown.

| <b>Gene</b> | <b>log2FC</b> | <b>P-value</b> | <b>Adjusted P-value</b> |
|-------------|---------------|----------------|-------------------------|
| AL928921.1  | 21.08062577   | 6.4E-18        | 2E-13                   |
| MTND1P23    | 8.416607267   | 3.1E-17        | 5E-13                   |
| PLPPR5      | 20.79151872   | 2.3E-10        | 2.4E-06                 |
| MTCO1P40    | 4.861051078   | 8.9E-10        | 7.1E-06                 |
| AC233755.1  | 23.2987727    | 1.7E-08        | 0.00011                 |
| MTCO1P12    | 3.908318794   | 4E-08          | 0.00021                 |
| CYP1A1      | 10.35776133   | 3E-07          | 0.00137                 |
| AC233755.2  | 23.98687336   | 4E-07          | 0.00157                 |
| MIR6723     | 10.07815427   | 5.7E-07        | 0.00203                 |
| CT83        | 21.87264078   | 3.8E-06        | 0.01111                 |
| IGHV1-69D   | 21.85605214   | 3.8E-06        | 0.01111                 |
| IGHV5-10-1  | 21.75424261   | 4.3E-06        | 0.01129                 |
| IGHV3-43    | 21.51515426   | 5.4E-06        | 0.01328                 |
| IGKV1-16    | 21.14512804   | 7.8E-06        | 0.01708                 |
| MTCO1P53    | 5.622433145   | 8E-06          | 0.01708                 |
| IGHV2-70    | 20.78332434   | 1.1E-05        | 0.02183                 |
| ANGPTL5     | 6.143201662   | 1.2E-05        | 0.02183                 |
| NPIPB2      | 3.728486561   | 1.4E-05        | 0.02503                 |
| CFAP61      | 6.198673742   | 1.5E-05        | 0.02503                 |
| WASHC1      | -1.565362268  | 2E-05          | 0.03167                 |
| CXorf57     | 1.433443939   | 2.1E-05        | 0.03167                 |
| IL4         | -3.594439035  | 0.4177         | 0.99985                 |
| IL5         | -4.987569857  | 0.04358        | 0.99985                 |
| IL13        | -3.300233034  | 0.05036        | 0.99985                 |
| IL31        | -5.172837444  | 0.26567        | 0.99985                 |





Table S8: Full list of DEGs (adjusted  $P < 0.05$ ) in African American (n=10) compared to European American (n=3) non-lesional PN skin.

| <b>Gene</b> | <b>log2FC</b> | <b>P-value</b> | <b>Adjusted P-value</b> |
|-------------|---------------|----------------|-------------------------|
| MTND1P23    | 8.823431825   | 3.6E-19        | 1.1E-14                 |
| MTCO1P40    | 5.119252291   | 1E-10          | 1.6E-06                 |
| MCEMP1      | 17.59924557   | 1.5E-10        | 1.6E-06                 |
| MTCO1P12    | 4.064941458   | 1.1E-08        | 7.7E-05                 |
| NELL1       | 6.728940634   | 1.2E-08        | 7.7E-05                 |
| AC084871.2  | 20.01200709   | 6.2E-08        | 0.00033                 |
| FCAR        | 18.87276485   | 1.4E-07        | 0.00065                 |
| KRTAP10-1   | 21.0442747    | 1.8E-07        | 0.00072                 |
| MMP10       | 14.84217501   | 2.2E-07        | 0.00078                 |
| AC123912.2  | 17.87852516   | 3.6E-07        | 0.00116                 |
| MIR6723     | 10.18998831   | 4.3E-07        | 0.00125                 |
| MTND4P24    | 4.191677255   | 1.1E-06        | 0.00297                 |
| AC091946.1  | 7.59272826    | 1.3E-06        | 0.0031                  |
| CHRNA9      | 8.87590683    | 1.4E-06        | 0.0031                  |
| ARG1        | 5.116522432   | 3.6E-06        | 0.0076                  |
| SERPINA12   | 4.556508793   | 4.5E-06        | 0.00891                 |
| CYP1A1      | 7.631498667   | 5.1E-06        | 0.00948                 |
| SPINK7      | 6.390691866   | 9.3E-06        | 0.01569                 |
| CT83        | 20.96761676   | 9.4E-06        | 0.01569                 |
| MUC16       | 2.913390205   | 1.4E-05        | 0.02162                 |
| AC005255.1  | 5.089548252   | 1.4E-05        | 0.02162                 |
| C6orf10     | -7.981238264  | 1.7E-05        | 0.02403                 |
| MUC21       | 19.77155631   | 1.9E-05        | 0.02542                 |
| SPRR2C      | 17.55152722   | 2E-05          | 0.02542                 |
| SLC47A2     | 2.985166103   | 2E-05          | 0.02542                 |
| AC010776.3  | 7.317391684   | 2.5E-05        | 0.03041                 |
| MTCO1P53    | 5.175105766   | 2.9E-05        | 0.03376                 |
| IGHM        | -5.376963806  | 3.4E-05        | 0.03847                 |
